# Supplementary material for: Comparative hologenomics of two Ixodes scapularis tick populations in New Jersey
Source: PeerJ. 2021 Nov 9;9:e12313. doi: 10.7717/peerj.12313 (PMC8588856; doi:10.7717/peerj.12313)
Supplement: Supplemental Information 4 — Homology searches were performed against the NCBI ’nr’ protein databases using raw reads (left) and assembled scaffolds (right). The corresponding top-hit accession numbers were annotated with assigned NCBI taxonomy using taxonomizr and summed for each genus in the “count” column. [file peerj-09-12313-s004.xlsx]

## Sheet: Sheet1
NWSE (reads)				PVIL (reads)				NWSE (scaffolds)				PVIL (scaffolds)
Phylum	Genus	count		Phylum	Genus	count		Phylum	Genus	count		Phylum	Genus	count
Arthropoda	Ixodes	2245393		Arthropoda	Ixodes	2448307		Arthropoda	Ixodes	126833		Arthropoda	Ixodes	132828
Proteobacteria	Rickettsia	365340		Proteobacteria	Rickettsia	500792		Proteobacteria	Anaplasma	15733		Proteobacteria	Anaplasma	16137
Proteobacteria	Anaplasma	361535		Proteobacteria	Anaplasma	388807		Arthropoda	Araneus	4086		Arthropoda	Araneus	4319
Arthropoda	Araneus	130891		Proteobacteria	Ehrlichia	142294		Proteobacteria	Ehrlichia	3675		Proteobacteria	Ehrlichia	3882
Proteobacteria	Ehrlichia	129403		Arthropoda	Araneus	142172		Proteobacteria	Rickettsia	3525		Proteobacteria	Rickettsia	3688
Arthropoda	Nuttalliella	36367		Arthropoda	Nuttalliella	39032		Arthropoda	Cryptotermes	1251		Arthropoda	Cryptotermes	1368
Echinodermata	Apostichopus	24459		Echinodermata	Apostichopus	27163		Arthropoda	Nuttalliella	1059		Echinodermata	Apostichopus	1116
Arthropoda	Cryptotermes	18915		Arthropoda	Cryptotermes	20746		Echinodermata	Apostichopus	1057		Arthropoda	Nuttalliella	1099
Cnidaria	Exaiptasia	18724		Cnidaria	Exaiptasia	20660		Arthropoda	Amblyomma	585		Arthropoda	Amblyomma	660
Arthropoda	Amblyomma	16613		Arthropoda	Amblyomma	18594		Cnidaria	Exaiptasia	562		Cnidaria	Exaiptasia	616
Nematoda	Trichuris	15057		Nematoda	Trichuris	15843		Nematoda	Trichuris	462		NA	NA	516
Arthropoda	Centruroides	11297		Arthropoda	Centruroides	12896		NA	NA	460		Arthropoda	Centruroides	488
Arthropoda	Stegodyphus	10159		Arthropoda	Daphnia	10354		Arthropoda	Centruroides	453		Nematoda	Trichuris	484
Arthropoda	Daphnia	10109		Arthropoda	Stegodyphus	10193		Cnidaria	Acropora	393		Cnidaria	Acropora	436
Cnidaria	Acropora	8945		Cnidaria	Acropora	9918		Arthropoda	Rhipicephalus	348		Chordata	Oryzias	360
Arthropoda	Rhipicephalus	8716		Proteobacteria	NA	9769		Chordata	Oryzias	345		Arthropoda	Rhipicephalus	341
NA	NA	8612		NA	NA	9468		Arthropoda	Stegodyphus	309		Echinodermata	Strongylocentrotus	300
Proteobacteria	NA	8461		Arthropoda	Rhipicephalus	9386		Echinodermata	Strongylocentrotus	283		Nematoda	Trichinella	291
Arthropoda	Lasius	7776		Echinodermata	Strongylocentrotus	8020		Nematoda	Trichinella	249		Arthropoda	Stegodyphus	270
Echinodermata	Strongylocentrotus	7289		Arthropoda	Lasius	8015		Arthropoda	Galendromus	244		Arthropoda	Galendromus	255
Nematoda	Trichinella	7183		Chordata	Oryzias	7360		Arthropoda	Lasius	233		Arthropoda	Lasius	249
Chordata	Oryzias	6678		Nematoda	Trichinella	7255		Cnidaria	Stylophora	222		Spirochaetes	Borreliella	238
Cnidaria	Stylophora	6487		Cnidaria	Stylophora	7136		Arthropoda	Daphnia	201		Cnidaria	Stylophora	238
Arthropoda	Galendromus	6335		Arthropoda	Galendromus	7072		Chordata	Labeo	196		Arthropoda	Dinothrombium	215
Chordata	Labeo	5633		Chordata	Labeo	6161		Arthropoda	Dinothrombium	196		Chordata	Labeo	194
Chordata	Xenopus	5038		Chordata	Xenopus	5610		Chordata	Anabarilius	175		Arthropoda	Daphnia	185
Firmicutes	NA	4864		Arthropoda	Dinothrombium	4944		Chordata	Xenopus	174		Chordata	Xenopus	167
Arthropoda	Dinothrombium	4434		Firmicutes	NA	4233		Proteobacteria	NA	146		Chordata	Anabarilius	158
Arthropoda	Eumeta	3760		Cnidaria	Dendronephthya	4079		Arthropoda	Limulus	146		Cnidaria	Dendronephthya	154
Chordata	Astatotilapia	3691		Arthropoda	Myzus	3928		Platyhelminthes	Schistosoma	142		Arthropoda	Limulus	150
Cnidaria	Dendronephthya	3594		Chordata	Astatotilapia	3806		Arthropoda	Myzus	135		Arthropoda	Leptotrombidium	145
Arthropoda	Myzus	3512		Arthropoda	Eumeta	3546		Priapulida	Priapulus	132		Proteobacteria	NA	141
Platyhelminthes	Schistosoma	3247		Porifera	Amphimedon	3520		Arthropoda	Leptotrombidium	132		Arthropoda	Myzus	141
Porifera	Amphimedon	3061		Spirochaetes	Borreliella	3479		Porifera	Amphimedon	127		Chordata	Astatotilapia	135
Proteobacteria	Candidatus+Thioglobus	2946		Platyhelminthes	Schistosoma	3477		Cnidaria	Dendronephthya	125		Proteobacteria	Candidatus	126
Ciliophora	Oxytricha	2859		Proteobacteria	Candidatus+Thioglobus	3353		Arthropoda	Tribolium	125		Arthropoda	Tribolium	126
Arthropoda	Leptotrombidium	2771		Arthropoda	Leptotrombidium	3141		Proteobacteria	Candidatus	121		Priapulida	Priapulus	121
Cnidaria	Orbicella	2693		Cnidaria	Orbicella	2968		Chordata	Astatotilapia	112		Arthropoda	Acyrthosiphon	118
Arthropoda	Tribolium	2557		Priapulida	Priapulus	2912		Spirochaetes	Borreliella	107		Porifera	Amphimedon	112
Mollusca	Elysia	2545		Arthropoda	Tribolium	2841		Arthropoda	Folsomia	105		Chordata	Carassius	111
Priapulida	Priapulus	2527		Arthropoda	Rhagoletis	2813		Chordata	Oreochromis	104		Platyhelminthes	Schistosoma	109
Arthropoda	Rhagoletis	2527		Mollusca	Mizuhopecten	2744		Arthropoda	Chilo	104		Arthropoda	Rhagoletis	109
Platyhelminthes	Hymenolepis	2505		Platyhelminthes	Hymenolepis	2590		Arthropoda	Trachymyrmex	99		Chordata	Oreochromis	107
Mollusca	Mizuhopecten	2501		Mollusca	Elysia	2587		Chordata	Erpetoichthys	94		Arthropoda	Chilo	107
Arthropoda	Penaeus	2365		Arthropoda	Diaphorina	2557		Arthropoda	Penaeus	94		Mollusca	Mizuhopecten	100
Arthropoda	Diaphorina	2357		Arthropoda	Penaeus	2540		Arthropoda	Acyrthosiphon	92		Arthropoda	Folsomia	99
Mollusca	Crassostrea	2288		Ciliophora	Oxytricha	2535		Arthropoda	Diaphorina	91		Arthropoda	Parasteatoda	97
Ciliophora	Stylonychia	2284		Arthropoda	Acyrthosiphon	2369		Mollusca	Octopus	89		Platyhelminthes	Clonorchis	94
Arthropoda	Acyrthosiphon	2144		Chordata	Oreochromis	2322		Chordata	Carassius	87		Arthropoda	Diaphorina	94
Arthropoda	Folsomia	2141		Arthropoda	Folsomia	2305		Arthropoda	Parasteatoda	87		Chordata	Cyprinus	89
Mollusca	Octopus	2123		Mollusca	Octopus	2286		Mollusca	Mizuhopecten	86		Arthropoda	Zootermopsis	78
Arthropoda	Chilo	2113		Mollusca	Crassostrea	2284		Chordata	Cyprinus	86		Mollusca	Crassostrea	74
Arthropoda	Aedes	2003		Arthropoda	Chilo	2237		Arthropoda	Rhagoletis	86		Chordata	Archocentrus	74
Chordata	Oreochromis	2002		Arthropoda	Aedes	2187		Mollusca	Crassostrea	85		Mollusca	Octopus	73
Arthropoda	Parasteatoda	1991		Ciliophora	Stylonychia	2105		Chordata	Archocentrus	84		Arthropoda	Trachymyrmex	72
Cnidaria	Nematostella	1921		Arthropoda	Parasteatoda	2087		Arthropoda	Hyposmocoma	83		Chordata	Austrofundulus	71
Spirochaetes	Borreliella	1902		Platyhelminthes	Clonorchis	2037		Arthropoda	Dufourea	83		Chordata	Erpetoichthys	70
Platyhelminthes	Clonorchis	1816		Chordata	Carassius	1976		Platyhelminthes	Clonorchis	82		Arthropoda	Dufourea	70
Chordata	Branchiostoma	1815		Chordata	Branchiostoma	1968		Arthropoda	Aedes	79		Arthropoda	Onthophagus	67
Chordata	Xiphophorus	1788		Mollusca	Biomphalaria	1955		Arthropoda	Melanaphis	75		Mollusca	Elysia	66
Actinobacteria	Arthrobacter	1771		Nematoda	Brugia	1885		Chordata	Xiphophorus	74		Chordata	Branchiostoma	66
Chordata	Carassius	1753		Platyhelminthes	Opisthorchis	1881		Chordata	Austrofundulus	70		Arthropoda	Blattella	66
Platyhelminthes	Opisthorchis	1747		Chordata	Xiphophorus	1845		Arthropoda	Blattella	68		Chordata	Xiphophorus	65
Mollusca	Biomphalaria	1734		Arthropoda	Trachymyrmex	1805		Arthropoda	Onthophagus	67		Arthropoda	Penaeus	63
Proteobacteria	Acinetobacter	1730		Chordata	Austrofundulus	1793		Arthropoda	Eumeta	65		Arthropoda	Melanaphis	63
Chordata	Austrofundulus	1672		Chordata	Erpetoichthys	1770		Mollusca	Elysia	64		Arthropoda	Hyposmocoma	63
Arthropoda	Trachymyrmex	1654		Cnidaria	Nematostella	1730		Cnidaria	Orbicella	63		Arthropoda	Aedes	63
Chordata	Erpetoichthys	1632		Chordata	Archocentrus	1720		Arthropoda	Temnothorax	61		Platyhelminthes	Hymenolepis	60
Chordata	Archocentrus	1569		Proteobacteria	Acinetobacter	1697		Chordata	Branchiostoma	60		Nematoda	Acanthocheilonema	60
Platyhelminthes	Macrostomum	1568		Chordata	Cyprinus	1673		Arthropoda	Cyphomyrmex	58		Arthropoda	Sipha	59
Chordata	Anabarilius	1469		Arthropoda	Papilio	1621		Arthropoda	Zootermopsis	57		Chordata	Clupea	58
Chordata	Cyprinus	1439		Chordata	Anabarilius	1584		Arthropoda	Papilio	57		Cnidaria	Orbicella	56
Arthropoda	Papilio	1431		Arthropoda	Ooceraea	1583		Arthropoda	Camponotus	57		Arthropoda	Papilio	54
Chordata	Poecilia	1413		Platyhelminthes	Macrostomum	1549		Cnidaria	Hydra	56		Arthropoda	Heliothis	54
Cnidaria	Hydra	1383		Actinobacteria	Arthrobacter	1526		Chordata	Clupea	56		Platyhelminthes	Macrostomum	53
Nematoda	Brugia	1352		Chordata	Poecilia	1460		Platyhelminthes	Hymenolepis	54		Nematoda	Ancylostoma	52
Arthropoda	Ooceraea	1339		Arthropoda	Onthophagus	1453		Arthropoda	Ooceraea	54		Chordata	Salmo	52
Arthropoda	Argas	1334		Chordata	Takifugu	1420		Chordata	Nothobranchius	52		Chordata	Paramormyrops	52
Chordata	Takifugu	1320		Arthropoda	Hyposmocoma	1410		Platyhelminthes	Macrostomum	50		Arthropoda	Eumeta	52
Arthropoda	Camponotus	1319		Cnidaria	Hydra	1372		Arthropoda	Sipha	50		Nematoda	Brugia	51
Arthropoda	Latrodectus	1317		Arthropoda	Ostrinia	1346		Chordata	Salmo	49		Negarnaviricota	NA	51
Arthropoda	Hyposmocoma	1302		Nematoda	Caenorhabditis	1331		Chordata	Danio	49		Arthropoda	Vollenhovia	51
Arthropoda	Apis	1298		Arthropoda	Camponotus	1327		Chordata	Gadus	47		Cnidaria	Hydra	50
Mucoromycota	Rhizophagus	1286		Chordata	Salmo	1306		Platyhelminthes	Opisthorchis	45		Chordata	Danio	49
Arthropoda	Onthophagus	1277		Chordata	Clupea	1299		Chordata	Pseudonaja	45		Arthropoda	Diabrotica	49
Chordata	Clupea	1238		Arthropoda	Limulus	1288		Arthropoda	Drosophila	45		Arthropoda	Amyelois	48
Chordata	Esox	1214		Chordata	Nothobranchius	1278		Hemichordata	Saccoglossus	44		Arthropoda	Ooceraea	47
Arthropoda	Ostrinia	1213		Chordata	Esox	1271		Chordata	Takifugu	44		Arthropoda	Camponotus	47
Chordata	Nothobranchius	1196		Arthropoda	Argas	1251		Arthropoda	Aphis	44		Hemichordata	Saccoglossus	46
Chordata	Monodelphis	1163		Arthropoda	Apis	1228		Nematoda	Ancylostoma	43		Arthropoda	Temnothorax	45
Arthropoda	Limulus	1163		Mucoromycota	Rhizophagus	1223		Arthropoda	Heliothis	43		Arthropoda	Nilaparvata	45
Nematoda	Caenorhabditis	1157		Arthropoda	Blattella	1208		Arthropoda	Nilaparvata	42		Chordata	Gadus	44
Chordata	Salmo	1144		Arthropoda	Latrodectus	1190		Arthropoda	Diabrotica	42		Chordata	Nothobranchius	43
Arthropoda	Diabrotica	1144		Arthropoda	Diabrotica	1189		Chordata	Paramormyrops	41		Chordata	Gekko	41
Arthropoda	Temnothorax	1101		Arthropoda	Temnothorax	1138		Arthropoda	Amyelois	40		Arthropoda	Ostrinia	41
Arthropoda	Agrilus	1100		Hemichordata	Saccoglossus	1136		Chordata	Latimeria	39		Platyhelminthes	Opisthorchis	40
Arthropoda	Melanaphis	1052		Arthropoda	Melanaphis	1119		Arthropoda	Ostrinia	39		Mucoromycota	Rhizophagus	40
Arthropoda	Vollenhovia	1047		Arthropoda	Cyphomyrmex	1097		Negarnaviricota	NA	37		Chordata	Takifugu	40
Arthropoda	Cyphomyrmex	1022		Arthropoda	Vollenhovia	1088		Mucoromycota	Rhizophagus	35		Chordata	Latimeria	39
Arthropoda	Cephus	1019		Nematoda	Acanthocheilonema	1085		Arthropoda	Vollenhovia	35		Arthropoda	Drosophila	39
Firmicutes	Staphylococcus	1003		Chordata	Gekko	1061		Nematoda	Caenorhabditis	33		Mollusca	Biomphalaria	37
Arthropoda	Blattella	1002		Arthropoda	Amyelois	1037		Mollusca	Biomphalaria	33		Arthropoda	Cyphomyrmex	37
Chordata	Podarcis	1001		Arthropoda	Solenopsis	986		Apicomplexa	Babesia	33		Arthropoda	Bicyclus	36
Hemichordata	Saccoglossus	996		Nematoda	Ancylostoma	983		Chordata	Poecilia	32		Nematoda	Caenorhabditis	35
Arthropoda	Solenopsis	976		Arthropoda	Heliothis	982		Mollusca	Aplysia	31		Chordata	Poecilia	34
Arthropoda	Coptotermes	961		Arthropoda	Agrilus	948		Chordata	Gekko	31		Arthropoda	Aphis	33
Chordata	Gekko	956		Chordata	Podarcis	947		Arthropoda	Nylanderia	31		Nematoda	Wuchereria	31
Arthropoda	Amyelois	950		Chordata	Monodelphis	929		Arthropoda	Leptinotarsa	31		Arthropoda	Nylanderia	31
Arthropoda	Nilaparvata	948		Arthropoda	Nilaparvata	927		Arthropoda	Diuraphis	31		Nematoda	Onchocerca	30
Nematoda	Ancylostoma	897		Mollusca	Aplysia	904		Chordata	Mastacembelus	29		Chordata	Triplophysa	30
Arthropoda	Heliothis	886		Chordata	Paramormyrops	886		Arthropoda	Trichonephila	29		Arthropoda	Varroa	30
Ascomycota	Colletotrichum	878		Chordata	Pseudonaja	883		Arthropoda	Harpegnathos	29		Arthropoda	Harpegnathos	30
Arthropoda	Drosophila	828		Chordata	Danio	881		Chordata	Boleophthalmus	27		Arthropoda	Diuraphis	30
Proteobacteria	Enterobacter	827		Arthropoda	Sipha	877		Arthropoda	Varroa	27		Proteobacteria	Acinetobacter	29
Chordata	Paramormyrops	827		Proteobacteria	Enterobacter	861		Arthropoda	Tropilaelaps	27		Chordata	Oncorhynchus	29
Arthropoda	Dufourea	827		Arthropoda	Cephus	858		Chordata	Esox	26		Chordata	Esox	29
Chordata	Pygocentrus	825		Arthropoda	Dufourea	844		Arthropoda	Trichoplusia	26		Arthropoda	Trichoplusia	29
Platyhelminthes	Schistocephalus	808		Brachiopoda	Lingula	837		Arthropoda	Anoplophora	25		Arthropoda	Copidosoma	29
Platyhelminthes	Echinococcus	805		Firmicutes	Staphylococcus	828		Arthropoda	Solenopsis	24		Arthropoda	Tropilaelaps	28
Chordata	Pseudonaja	788		Chordata	Pygocentrus	825		Arthropoda	Operophtera	24		Chordata	Boleophthalmus	27
Annelida	Capitella	777		Arthropoda	Anoplophora	820		Chordata	Podarcis	23		Chordata	Amphiprion	27
Mollusca	Aplysia	776		Arthropoda	Drosophila	800		Chordata	Acanthochromis	23		Arthropoda	Trichonephila	27
Arthropoda	Sipha	773		Chordata	Gadus	795		Arthropoda	Rhopalosiphum	23		Arthropoda	Anoplophora	27
Chordata	Danio	741		Arthropoda	Helicoverpa	795		Arthropoda	Habropoda	23		Arthropoda	Manduca	26
Arthropoda	Habropoda	740		Annelida	Capitella	792		Arthropoda	Dermatophagoides	23		Mollusca	Pomacea	25
Arthropoda	Scylla	735		Arthropoda	Harpegnathos	790		Proteobacteria	Acinetobacter	22		Arthropoda	Rhopalosiphum	25
Chordata	Gadus	722		Platyhelminthes	Echinococcus	788		Chordata	Triplophysa	21		Nematoda	Loa	24
Mollusca	Conus	705		Ascomycota	Colletotrichum	758		Arthropoda	Helicoverpa	21		Cnidaria	Pocillopora	23
Brachiopoda	Lingula	694		Arthropoda	Diuraphis	742		Chordata	Notechis	20		Arthropoda	Plutella	23
Arthropoda	Anoplophora	687		Chordata	Oncorhynchus	735		Chordata	Chrysemys	20		Arthropoda	Orchesella	23
Chordata	Mastacembelus	682		Arthropoda	Habropoda	731		Arthropoda	Hyalella	20		Arthropoda	Habropoda	23
Arthropoda	Harpegnathos	680		Arthropoda	Bicyclus	706		Arthropoda	Ctenocephalides	20		Chordata	Sinocyclocheilus	22
Apicomplexa	Babesia	674		Arthropoda	Zootermopsis	704		Chordata	Tachysurus	19		Chordata	Pygocentrus	22
Chordata	Oncorhynchus	647		Platyhelminthes	Schistocephalus	693		Chordata	Oncorhynchus	19		Arthropoda	Dermatophagoides	22
Arthropoda	Helicoverpa	641		Arthropoda	Coptotermes	689		Brachiopoda	Lingula	19		Nematoda	Litomosoides	21
Arthropoda	Diuraphis	632		Candidatus+Tectomicrobia	Candidatus+Entotheonella	662		Chordata	Pygocentrus	18		Chordata	Tachysurus	21
Chordata	Marmota	614		Arthropoda	Scylla	660		Arthropoda	Copidosoma	18		Chordata	Mastacembelus	21
Candidatus+Tectomicrobia	Candidatus+Entotheonella	614		Mollusca	Pomacea	644		Mollusca	Pomacea	17		Arthropoda	Spodoptera	21
Mollusca	Pomacea	600		Mollusca	Lottia	640		Chordata	Sinocyclocheilus	17		Proteobacteria	Enterobacter	20
Arthropoda	Zootermopsis	596		Cnidaria	Pocillopora	638		Arthropoda	Plutella	17		Mollusca	Aplysia	20
Arthropoda	Bicyclus	596		Chordata	Mastacembelus	619		Arthropoda	Megachile	17		Chordata	Stegastes	20
Arthropoda	Aphis	565		Arthropoda	Eyprepocnemis	614		Arthropoda	Linepithema	17		Chordata	Pseudonaja	20
Arthropoda	Trichoplusia	562		Chordata	Protobothrops	609		Microsporidia	Enterospora	16		Chordata	Larimichthys	19
Chordata	Protobothrops	544		Mollusca	Conus	586		Chordata	Stegastes	16		Chordata	Acanthochromis	19
Cnidaria	Pocillopora	538		Arthropoda	Trichoplusia	586		Chordata	Scleropages	16		Arthropoda	Portunus	19
Arthropoda	Wasmannia	538		Chordata	Amphiprion	573		Chordata	Protobothrops	16		Arthropoda	Ctenocephalides	19
Arthropoda	Nylanderia	527		Arthropoda	Plutella	569		Chordata	Larimichthys	16		Chordata	Podarcis	18
Chordata	Amphiprion	516		Arthropoda	Aphis	560		Chordata	Gouania	16		Arthropoda	Solenopsis	18
Arthropoda	Spodoptera	507		Chordata	Tachysurus	558		Arthropoda	Spodoptera	16		Platyhelminthes	Schistocephalus	17
Chordata	Astyanax	500		Arthropoda	Nylanderia	557		Arthropoda	Osmia	16		Chordata	Tetraodon	17
Mollusca	Lottia	490		Arthropoda	Spodoptera	554		Arthropoda	Bicyclus	16		Candidatus	NA	17
Arthropoda	Plutella	488		Arthropoda	Wasmannia	549		Aquificae	Aquifex	16		Chordata	Astyanax	16
Arthropoda	Eyprepocnemis	487		Chordata	Sinocyclocheilus	543		Platyhelminthes	Schistocephalus	15		Brachiopoda	Lingula	16
Chordata	Sinocyclocheilus	486		Chordata	Astyanax	536		Chordata	Hirundo	15		Arthropoda	Wasmannia	16
Rhodophyta	Chondrus	482		Chordata	Larimichthys	532		Chordata	Amphiprion	15		Arthropoda	Operophtera	16
Chordata	Larimichthys	482		Chordata	Lates	519		Arthropoda	Tetranychus	15		Arthropoda	Leptinotarsa	16
Echinodermata	Acanthaster	480		Arthropoda	Leptinotarsa	507		Arthropoda	Portunus	15		Negarnaviricota	Phlebovirus	15
Apicomplexa	Plasmodium	475		Echinodermata	Acanthaster	500		Arthropoda	Manduca	15		Chordata	Scleropages	15
Chordata	Boleophthalmus	467		Chordata	Marmota	494		Proteobacteria	Enterobacter	14		Chordata	Lates	15
Aquificae	Aquifex	462		Chordata	Latimeria	473		Chordata	Sparus	14		Arthropoda	Pseudomyrmex	15
Chordata	Lates	451		Aquificae	Aquifex	465		Chordata	Homo	14		Arthropoda	Osmia	15
Arthropoda	Pediculus	451		Chordata	Boleophthalmus	462		Chordata	Astyanax	14		Arthropoda	Eriphia	15
Arthropoda	Leptinotarsa	451		Chordata	Anabas	461		Arthropoda	Pseudomyrmex	14		Annelida	Capitella	15
Chordata	Latimeria	441		Arthropoda	Manduca	453		Arthropoda	Eyprepocnemis	14		Nematoda	Haemonchus	14
Chordata	Tachysurus	425		Chordata	Notechis	446		Annelida	Capitella	14		Microsporidia	Enterospora	14
Arthropoda	Manduca	425		Arthropoda	Clunio	432		Negarnaviricota	Phlebovirus	13		Chordata	Notechis	14
Streptophyta	Vigna	407		Nematoda	Onchocerca	429		NA	Avihepadnavirus	13		Chordata	Chrysemys	14
Chordata	Notechis	407		Apicomplexa	Plasmodium	421		Cnidaria	Pocillopora	13		Arthropoda	Megachile	14
Chytridiomycota	Synchytrium	397		Cnidaria	Thelohanellus	408		Chordata	Rhinatrema	13		Arthropoda	Hyalella	14
Chordata	Anabas	388		Rhodophyta	Chondrus	399		Platyhelminthes	Echinostoma	12		Arthropoda	Helicoverpa	14
Chordata	Bubalus	367		Nematoda	Litomosoides	399		Nematoda	Haemonchus	12		Arthropoda	Eyprepocnemis	14
Chordata	Limosa	365		Negarnaviricota	NA	398		Chordata	Myripristis	12		Arthropoda	Bactrocera	14
Ascomycota	Erysiphe	354		Chordata	Limosa	393		Chordata	Lates	12		Arthropoda	Atta	14
Arthropoda	Clunio	354		Streptophyta	Vigna	392		Chordata	Fundulus	12		Annelida	Helobdella	14
Arthropoda	Osmia	346		Arthropoda	Pediculus	383		Arthropoda	Orchesella	12		Proteobacteria	Wolbachia	13
Chordata	Cricetulus	341		Ascomycota	Erysiphe	379		Arthropoda	Euroglyphus	12		Chordata	Vombatus	13
Chordata	Myripristis	333		Arthropoda	Orchesella	373		Annelida	Helobdella	12		Chordata	Myripristis	13
Arthropoda	Orchesella	328		Chytridiomycota	Synchytrium	362		Mollusca	Lottia	11		Chordata	Maylandia	13
Negarnaviricota	NA	320		Arthropoda	Bactrocera	359		Chordata	Vombatus	11		Bacteroidetes	Marinifilum	13
Cnidaria	Thelohanellus	318		Arthropoda	Pseudomyrmex	357		Chordata	Cyprinodon	11		Arthropoda	Formica	13
Arthropoda	Bactrocera	317		Chordata	Bubalus	350		Chordata	Acipenser	11		Aquificae	Aquifex	13
Arthropoda	Pseudomyrmex	315		Arthropoda	Operophtera	345		Candidatus	NA	11		Cnidaria	Nematostella	12
Chordata	Thamnophis	314		Arthropoda	Vanessa	344		Arthropoda	Wasmannia	11		Ascomycota	Erysiphe	12
Nematoda	Haemonchus	310		Nematoda	Loa	341		Arthropoda	Culex	11		Arthropoda	Tigriopus	12
Chordata	Sparus	300		Nematoda	Haemonchus	335		Nematoda	Teladorsagia	10		Arthropoda	Tetranychus	12
Arthropoda	Vanessa	296		Nematoda	Wuchereria	333		Chordata	Thamnophis	10		Arthropoda	Dinoponera	12
Arthropoda	Diachasma	292		Chordata	Sparus	331		Chordata	Anolis	10		Arthropoda	Bombyx	12
Arthropoda	Operophtera	288		Arthropoda	Diachasma	329		Chordata	Anabas	10		Chordata	Cricetulus	11
Arthropoda	Bombyx	288		Arthropoda	Megachile	327		Arthropoda	Pediculus	10		Arthropoda	Vanessa	11
Streptophyta	Papaver	286		Chordata	Chrysemys	324		Arthropoda	Dinoponera	10		Arthropoda	Haemaphysalis	11
Arthropoda	Musca	281		Arthropoda	Hyalella	324		Arthropoda	Bactrocera	10		Arthropoda	Dendroctonus	11
Chordata	Chrysemys	275		Arthropoda	Osmia	320		Arthropoda	Agrilus	10		Arthropoda	Bythograea	11
Bacteroidetes	Marinifilum	275		Chordata	Ciona	316		Chordata	Seriola	9		Arthropoda	Agrilus	11
Chordata	Haplochromis	271		Chordata	Haplochromis	315		Chordata	Perca	9		Echinodermata	Acanthaster	10
Chordata	Ciona	264		Chordata	Thamnophis	309		Chordata	Pelodiscus	9		Chordata	Sus	10
Chordata	Cuculus	263		Bacteroidetes	Marinifilum	304		Chordata	Parambassis	9		Chordata	Salarias	10
Ciliophora	Halteria	259		Arthropoda	Bombyx	304		Chordata	Maylandia	9		Chordata	Homo	10
Platyhelminthes	Dibothriocephalus	257		Arthropoda	Musca	297		Chordata	Chelonia	9		Chordata	Hirundo	10
Chordata	Gouania	255		Chordata	Myripristis	289		Arthropoda	Nasonia	9		Arthropoda	Linepithema	10
Arthropoda	Hyalella	255		Chordata	Cuculus	289		Arthropoda	Frankliniella	9		Arthropoda	Euroglyphus	10
Chordata	Salarias	254		Bacteroidetes	NA	289		Arthropoda	Diachasma	9		Arthropoda	Armadillidium	10
Arthropoda	Ctenocephalides	253		Arthropoda	Ctenocephalides	285		Arthropoda	Cimex	9		Platyhelminthes	Dibothriocephalus	9
Arthropoda	Linepithema	250		Proteobacteria	Wolbachia	284		Arthropoda	Bombyx	9		Mollusca	Lottia	9
Annelida	Helobdella	247		Arthropoda	Frankliniella	278		Nematoda	Nippostrongylus	8		Ciliophora	Stylonychia	9
Chordata	Cyprinodon	245		Chordata	Cyprinodon	270		Nematoda	Brugia	8		Chordata	Sparus	9
Arthropoda	Frankliniella	245		Chordata	Acanthochromis	268		Echinodermata	Acanthaster	8		Chordata	Rhinatrema	9
Nematoda	Heligmosomoides	241		Annelida	Helobdella	262		Cnidaria	Thelohanellus	8		Chordata	Protobothrops	9
Arthropoda	Megachile	240		Microsporidia	Enterospora	259		Chordata	Labrus	8		Chordata	Limosa	9
Proteobacteria	Klebsiella	239		Nematoda	Heligmosomoides	255		Chordata	Kryptolebias	8		Chordata	Gouania	9
Chordata	Acanthochromis	239		Arthropoda	Cimex	254		Arthropoda	Hottentotta	8		Chordata	Cynoglossus	9
Arthropoda	Laodelphax	239		Platyhelminthes	Echinostoma	251		Arthropoda	Dendroctonus	8		Chordata	Anolis	9
Streptophyta	Gossypium	237		Ciliophora	Halteria	250		Arthropoda	Cotesia	8		Arthropoda	Monomorium	9
Chordata	Parambassis	236		Arthropoda	Dinoponera	248		Arthropoda	Cephus	8		Arthropoda	Frankliniella	9
Chordata	Collichthys	234		Streptophyta	Papaver	247		Streptophyta	Chara	7		Arthropoda	Asbolus	9
Bacteroidetes	NA	234		Chordata	Gouania	247		Negarnaviricota	Orthonairovirus	7		Streptophyta	Lactuca	8
Chordata	Stegastes	232		Arthropoda	Linepithema	246		Ciliophora	Stylonychia	7		Proteobacteria	Klebsiella	8
Microsporidia	Enterospora	230		Arthropoda	Laodelphax	245		Chordata	Myotis	7		NA	Avihepadnavirus	8
Platyhelminthes	Echinostoma	229		Streptophyta	Gossypium	240		Chordata	Haplochromis	7		Mollusca	Conus	8
Arthropoda	Varroa	229		Platyhelminthes	Dibothriocephalus	237		Chordata	Echeneis	7		Cnidaria	Thelohanellus	8
Arthropoda	Cimex	220		Chordata	Cricetulus	236		Chordata	Ciona	7		Chordata	Pelodiscus	8
Chordata	Anolis	215		Proteobacteria	Klebsiella	235		Bacteroidetes	Marinifilum	7		Chordata	Parambassis	8
Arthropoda	Trichonephila	211		Chordata	Stegastes	234		Arthropoda	Tigriopus	7		Chordata	Danionella	8
Arthropoda	Rhopalosiphum	211		Arthropoda	Rhopalosiphum	232		Arthropoda	Oryctes	7		Chordata	Collichthys	8
Chordata	Cynoglossus	207		Chordata	Parambassis	229		Arthropoda	Neodiprion	7		Chordata	Anabas	8
NA	Phytophthora	205		Chordata	Maylandia	228		Arthropoda	Laodelphax	7		Arthropoda	Pycnoscelus	8
Firmicutes	Streptococcus	204		NA	Phytophthora	224		Arthropoda	Atta	7		Arthropoda	Nasonia	8
Chordata	Triplophysa	202		Chordata	Collichthys	224		Arthropoda	Asbolus	7		Arthropoda	Laodelphax	8
Arthropoda	Dinoponera	201		Arthropoda	Dermatophagoides	224		Arthropoda	Armadillidium	7		Arthropoda	Bemisia	8
Arthropoda	Nasonia	199		Chordata	Salarias	220		Arthropoda	Acromyrmex	7		Streptophyta	Chara	7
Streptophyta	Medicago	196		Chordata	Anolis	219		Streptophyta	Lactuca	6		Nematoda	Nippostrongylus	7
Chordata	Pelodiscus	195		Arthropoda	Tetranychus	216		Proteobacteria	Klebsiella	6		NA	Phytophthora	7
Streptophyta	Chara	192		Chordata	Seriola	215		Nematoda	Steinernema	6		Chordata	Alligator	7
Arthropoda	Dermatophagoides	192		Chordata	Cynoglossus	214		Nematoda	Onchocerca	6		Arthropoda	Nicrophorus	7
Chordata	Bos	190		Arthropoda	Varroa	213		NA	Phytophthora	6		Arthropoda	Clunio	7
Nematoda	Teladorsagia	188		Arthropoda	Copidosoma	213		Firmicutes	NA	6		Arthropoda	Cimex	7
Chordata	Scleropages	187		Proteobacteria	Legionella	211		Cnidaria	Nematostella	6		Arthropoda	Anopheles	7
Basidiomycota	Trametes	186		Chordata	Scleropages	208		Chytridiomycota	Synchytrium	6		Arthropoda	Acromyrmex	7
Chordata	Seriola	185		Arthropoda	Formica	208		Chordata	Tetraodon	6		Streptophyta	Klebsormidium	6
Chordata	Homo	180		Proteobacteria	Candidatus+Paracaedibacter	206		Chordata	Sus	6		Platyhelminthes	Echinostoma	6
Arthropoda	Tetranychus	178		Basidiomycota	Trametes	204		Chordata	Salvelinus	6		Nematoda	Teladorsagia	6
Arthropoda	Copidosoma	178		Streptophyta	Chara	202		Chordata	Marmota	6		Chordata	Tinamus	6
Chordata	Maylandia	177		Arthropoda	Trichonephila	201		Chordata	Limosa	6		Chordata	Thamnophis	6
Proteobacteria	Sodalis	176		Chordata	Pelodiscus	194		Chordata	Leptonychotes	6		Chordata	Salvelinus	6
Chordata	Bagarius	176		Arthropoda	Nasonia	194		Bacteroidetes	NA	6		Chordata	Notothenia	6
Chordata	Hirundo	173		Chordata	Hirundo	193		Arthropoda	Sarcoptes	6		Chordata	Kryptolebias	6
Arthropoda	Trichogramma	173		Bacteroidetes	Larkinella	193		Arthropoda	Orussus	6		Chordata	Haplochromis	6
Arthropoda	Ornithodoros	170		Arthropoda	Atta	187		Arthropoda	Nicrophorus	6		Chordata	Gulo	6
Chordata	Mus	167		Chordata	Triplophysa	186		Arthropoda	Musca	6		Chordata	Fundulus	6
Nematoda	Nippostrongylus	160		Chordata	Acipenser	184		Arthropoda	Haemaphysalis	6		Chordata	Camelus	6
Chordata	Ailuropoda	159		Chordata	Bagarius	182		Arthropoda	Hadogenes	6		Arthropoda	Musca	6
Arthropoda	Formica	157		Chordata	Bos	180		Arthropoda	Eufriesea	6		Arthropoda	Hottentotta	6
Arthropoda	Lasionectes	156		Basidiomycota	Rhizoctonia	175		Arthropoda	Eriphia	6		Arthropoda	Eufriesea	6
Chordata	Rhinatrema	155		Arthropoda	Ornithodoros	173		Streptophyta	Vitis	5		Arthropoda	Dermacentor	6
Basidiomycota	Puccinia	155		Streptophyta	Medicago	171		Streptophyta	Pyrus	5		Arthropoda	Culex	6
Chordata	Styela	154		Streptophyta	Cajanus	171		Rotifera	Brachionus	5		Arthropoda	Apis	6
NA	Trypanosoma	152		Arthropoda	Anopheles	169		Proteobacteria	Escherichia	5		Nematoda	Thelazia	5
Bacteroidetes	Larkinella	152		Chordata	Microcaecilia	163		Nematoda	Acanthocheilonema	5		Firmicutes	NA	5
Streptophyta	Capsicum	151		Chordata	Homo	163		Ciliophora	Oxytricha	5		Chordata	Seriola	5
Arthropoda	Atta	150		Nematoda	Teladorsagia	161		Chordata	Salarias	5		Chordata	Phalacrocorax	5
Arthropoda	Anopheles	148		NA	Trypanosoma	161		Chordata	Pundamilia	5		Chordata	Perca	5
Proteobacteria	Legionella	141		Arthropoda	Armadillidium	161		Chordata	Liparis	5		Chordata	Neolamprologus	5
Chordata	Paroedura	141		Arthropoda	Trichogramma	160		Chordata	Equus	5		Chordata	Mus	5
Arthropoda	Hadogenes	139		Arthropoda	Haemaphysalis	160		Chordata	Danionella	5		Chordata	Microcaecilia	5
Arthropoda	Oeneis	138		Chordata	Rhinatrema	158		Chordata	Cricetulus	5		Chordata	Leptonychotes	5
Proteobacteria	Candidatus+Paracaedibacter	137		Chordata	Salvelinus	155		Chordata	Collichthys	5		Chordata	Cyprinodon	5
Chordata	Chelonia	137		Firmicutes	Streptococcus	153		Chordata	Alligator	5		Chordata	Ciona	5
Arthropoda	Haemaphysalis	137		Chordata	Ailuropoda	153		Arthropoda	Pycnoscelus	5		Chordata	Chlorocebus	5
Chordata	Microcaecilia	134		Proteobacteria	Sodalis	152		Arthropoda	Pogonomyrmex	5		Chordata	Chelonia	5
Arthropoda	Neodiprion	131		Arthropoda	Hadogenes	149		Arthropoda	Oeneis	5		Chordata	Acipenser	5
Chordata	Salvelinus	130		Arthropoda	Eufriesea	147		Arthropoda	Monomorium	5		Arthropoda	Trichogramma	5
Chordata	Acipenser	129		Chordata	Sus	145		Arthropoda	Fopius	5		Arthropoda	Pediculus	5
Arthropoda	Tropilaelaps	129		Chordata	Paroedura	145		Arthropoda	Eurytemora	5		Arthropoda	Locusta	5
Arthropoda	Armadillidium	124		Arthropoda	Agrius	145		Arthropoda	Ceratina	5		Arthropoda	Halyomorpha	5
Chordata	Tetraodon	121		Chordata	Chelonia	143		Arthropoda	Bythograea	5		Arthropoda	Eurytemora	5
Streptophyta	Cajanus	120		Nematoda	Nippostrongylus	138		Arthropoda	Anopheles	5		Arthropoda	Cotesia	5
Basidiomycota	Rhizoctonia	120		Basidiomycota	Puccinia	138		Tardigrada	Hypsibius	4		Arthropoda	Cephus	5
Arthropoda	Diprion	119		Arthropoda	Tropilaelaps	136		Streptophyta	Klebsormidium	4		Nematoda	Toxocara	4
Chordata	Electrophorus	116		Chordata	Alligator	133		Proteobacteria	Wolbachia	4		Negarnaviricota	Mivirus	4
Negarnaviricota	Phlebovirus	115		Streptophyta	Capsicum	131		Proteobacteria	Sodalis	4		Mucoromycota	Lichtheimia	4
Chordata	Fundulus	114		Arthropoda	Neodiprion	130		Platyhelminthes	Dibothriocephalus	4		Firmicutes	Epulopiscium	4
Chordata	Terrapene	113		Arthropoda	Oeneis	128		Nematoda	Toxocara	4		Chordata	Rattus	4
Arthropoda	Eufriesea	110		Chordata	Vombatus	126		Mollusca	Placopecten	4		Chordata	Paroedura	4
Arthropoda	Cotesia	108		Negarnaviricota	Phlebovirus	124		Mollusca	Conus	4		Chordata	Liparis	4
Arthropoda	Agrius	108		Chordata	Mus	124		Mollusca	Azumapecten	4		Chordata	Lepisosteus	4
Streptophyta	Klebsormidium	106		Chordata	Fundulus	122		Firmicutes	Streptococcus	4		Chordata	Ictalurus	4
Arthropoda	Lucilia	103		Chordata	Tetraodon	115		Chordata	Zosterops	4		Chordata	Hippocampus	4
Chordata	Sus	102		Arthropoda	Tityus	115		Chordata	Pteropus	4		Chordata	Carlito	4
Chordata	Ornithorhynchus	100		Chordata	Notothenia	113		Chordata	Notothenia	4		Arthropoda	Trichomalopsis	4
Bacteroidetes	Candidatus+Nephrothrix	98		Chordata	Hippocampus	112		Chordata	Ictalurus	4		Arthropoda	Sarcoptes	4
Nematoda	Litomosoides	96		Proteobacteria	Oceanimonas	111		Chordata	Gulo	4		Arthropoda	Pogonomyrmex	4
Chordata	Vombatus	96		Bacteroidetes	Candidatus+Nephrothrix	111		Chordata	Camelus	4		Arthropoda	Oryctes	4
Arthropoda	Portunus	96		Arthropoda	Lucilia	111		Ascomycota	Erysiphe	4		Arthropoda	Ornithodoros	4
Proteobacteria	Desulfocapsa	94		Chordata	Ornithorhynchus	109		Arthropoda	Vanessa	4		Arthropoda	Galleria	4
Arthropoda	Bemisia	94		Arthropoda	Portunus	108		Arthropoda	Trichogramma	4		Arthropoda	Fopius	4
Chordata	Hippocampus	93		Arthropoda	Eriphia	107		Arthropoda	Lucilia	4		Tardigrada	Ramazzottius	3
Arthropoda	Ceratina	93		Tardigrada	Ramazzottius	106		Arthropoda	Formica	4		Streptophyta	Oryza	3
Chordata	Kryptolebias	92		Chordata	Nanorana	105		Arthropoda	Dermacentor	4		Placozoa	Trichoplax	3
Arthropoda	Bombus	92		Firmicutes	Epulopiscium	103		Arthropoda	Argas	4		Nematoda	Steinernema	3
Chordata	Alligator	91		Chordata	Electrophorus	102		Arthropoda	Agrius	4		Nematoda	Oesophagostomum	3
Arthropoda	Eurytemora	91		Arthropoda	Eurytemora	102		Annelida	Alvinella	4		Nematoda	Gongylonema	3
Arthropoda	Triops	90		Arthropoda	Bemisia	102		Streptophyta	Rhodamnia	3		Nematoda	Dracunculus	3
Arthropoda	Culex	89		Arthropoda	Nicrophorus	101		Proteobacteria	Photobacterium	3		Nematoda	Cylicostephanus	3
Arthropoda	Eriphia	88		Arthropoda	Cotesia	101		Nematoda	Soboliphyme	3		Negarnaviricota	Vesiculovirus	3
Proteobacteria	Oceanimonas	84		Streptophyta	Klebsormidium	100		Nematoda	Oesophagostomum	3		Negarnaviricota	Quaranjavirus	3
Proteobacteria	Vibrio	83		Bacteroidetes	Candidatus+Cardinium	98		Nematoda	Gongylonema	3		Firmicutes	Streptococcus	3
Basidiomycota	Tilletia	83		Apicomplexa	Babesia	97		NA	Aphanomyces	3		Firmicutes	Staphylococcus	3
Arthropoda	Sceptrophasma	83		Chordata	Terrapene	96		Mucoromycota	Glomus	3		Ciliophora	Oxytricha	3
Chordata	Nanorana	82		Arthropoda	Microplitis	95		Firmicutes	Staphylococcus	3		Chytridiomycota	Synchytrium	3
Tardigrada	Ramazzottius	81		Arthropoda	Ceratina	94		Chordata	Sturnus	3		Chordata	Tupaia	3
Arthropoda	Nicrophorus	79		Arthropoda	Bombus	94		Chordata	Peromyscus	3		Chordata	Terrapene	3
Arthropoda	Monomorium	79		Streptophyta	Vitis	93		Chordata	Paroedura	3		Chordata	Pundamilia	3
Arthropoda	Microplitis	79		Arthropoda	Lasionectes	92		Chordata	Paralichthys	3		Chordata	Phascolarctos	3
Chordata	Perca	78		Arthropoda	Dendroctonus	89		Chordata	Ophiophagus	3		Chordata	Neotoma	3
Streptophyta	Lactuca	76		Streptophyta	Cucumis	88		Chordata	Microcaecilia	3		Chordata	Myotis	3
Streptophyta	Herrania	76		Bacteroidetes	Flavobacterium	86		Chordata	Meleagris	3		Chordata	Gambusia	3
Firmicutes	Epulopiscium	76		Arthropoda	Diprion	86		Chordata	Lepisosteus	3		Chordata	Equus	3
Streptophyta	Vitis	75		Arthropoda	Triops	85		Chordata	Gambusia	3		Chordata	Dromaius	3
Streptophyta	Trifolium	75		Chordata	Styela	84		Chordata	Desmodus	3		Chordata	Cuculus	3
Chordata	Notothenia	74		Proteobacteria	Desulfocapsa	83		Chordata	Cynoglossus	3		Chordata	Cervus	3
Bacteroidetes	Candidatus+Cardinium	73		Arthropoda	Monomorium	83		Chordata	Cuculus	3		Chordata	Callipepla	3
Arthropoda	Asbolus	73		Firmicutes	Carnobacterium	81		Chordata	Colinus	3		Basidiomycota	Phellinidium	3
Firmicutes	Bacillus	72		Streptophyta	Lactuca	80		Chordata	Bos	3		Bacteroidetes	NA	3
Arthropoda	Pectinophora	71		Streptophyta	Erythranthe	80		Chordata	Apaloderma	3		Arthropoda	Pectinophora	3
Arthropoda	Polistes	69		Chordata	Kryptolebias	80		Arthropoda	Zeugodacus	3		Arthropoda	Oeneis	3
Proteobacteria	Magnetospirillum	68		Nematoda	Steinernema	79		Arthropoda	Polistes	3		Arthropoda	Neodiprion	3
Streptophyta	Phaseolus	67		Firmicutes	Bacillus	79		Arthropoda	Halyomorpha	3		Arthropoda	Heliconius	3
Streptophyta	Cucumis	67		Proteobacteria	Vibrio	78		Arthropoda	Galleria	3		Arthropoda	Hadogenes	3
Arthropoda	Oryctes	65		Proteobacteria	Pararhodospirillum	75		Arthropoda	Cupiennius	3		Arthropoda	Diachasma	3
Streptophyta	Oryza	64		Nematoda	Toxocara	75		Arthropoda	Bombus	3		Arthropoda	Ceratina	3
Arthropoda	Dendroctonus	64		Proteobacteria	Pseudomonas	71		Arthropoda	Bemisia	3		Arthropoda	Bombus	3
Bacteroidetes	Flavobacterium	63		Chordata	Perca	71		Arthropoda	Apis	3		Zoopagomycota	Smittium	2
Nematoda	Steinernema	62		Arthropoda	Culex	71		Arthropoda	Abraxas	3		Streptophyta	Rhodamnia	2
Arthropoda	Tityus	62		Chordata	Danionella	70		Tardigrada	Ramazzottius	2		Streptophyta	Helianthus	2
Arthropoda	Scaptodrosophila	61		Arthropoda	Asbolus	69		Streptophyta	Zostera	2		Streptophyta	Coffea	2
Negarnaviricota	Orthonairovirus	60		Streptophyta	Zostera	68		Streptophyta	Setaria	2		Streptophyta	Brassica	2
Mucoromycota	Rhizopus	60		Mucoromycota	Rhizopus	67		Streptophyta	Gossypium	2		Streptophyta	Arachis	2
Chordata	Labrus	60		Chordata	Labrus	67		Streptophyta	Glycine	2		Proteobacteria	Thalassococcus	2
Arthropoda	Euroglyphus	60		Basidiomycota	Tilletia	67		Platyhelminthes	Trichobilharzia	2		Proteobacteria	Sodalis	2
Streptophyta	Helianthus	58		Arthropoda	Polistes	67		Nematoda	Wuchereria	2		Proteobacteria	Paracaedibacteraceae	2
Arthropoda	Bythograea	58		Chordata	Picoides	64		Nematoda	Litomosoides	2		Proteobacteria	Orientia	2
Rotifera	Brachionus	57		Arthropoda	Sceptrophasma	64		Nematoda	Heligmosomoides	2		Proteobacteria	Oceanimonas	2
Firmicutes	Carnobacterium	57		Arthropoda	Bythograea	64		Nematoda	Anisakis	2		Proteobacteria	Neisseria	2
Chordata	Zosterops	57		Proteobacteria	Magnetospirillum	63		NA	Trypanosoma	2		Proteobacteria	Midichloriaceae	2
Chordata	Echeneis	57		Nematoda	Oesophagostomum	63		Mucoromycota	Rhizopus	2		Proteobacteria	Desulfocapsa	2
Chordata	Danionella	57		Chordata	Zosterops	63		Microsporidia	Enterocytozoon	2		Platyhelminthes	Fasciolopsis	2
Proteobacteria	Escherichia	56		Arthropoda	Orussus	61		Echinodermata	Pisaster	2		Platyhelminthes	Fasciola	2
Nematoda	Toxocara	56		Nematoda	Thelazia	60		Chordata	Tupaia	2		Nematoda	Soboliphyme	2
Platyhelminthes	Trichobilharzia	53		Arthropoda	Scaptodrosophila	60		Chordata	Tinamus	2		Nematoda	Heligmosomoides	2
Chordata	Pundamilia	52		Arthropoda	Euroglyphus	60		Chordata	Terrapene	2		Nematoda	Anisakis	2
Basidiomycota	Cryptococcus	52		Arthropoda	Acromyrmex	59		Chordata	Suricata	2		Nematoda	Angiostrongylus	2
Arthropoda	Asellus	52		Chordata	Monopterus	58		Chordata	Rhincodon	2		Negarnaviricota	Orthonairovirus	2
Tardigrada	Hypsibius	51		Arthropoda	Tigriopus	58		Chordata	Rattus	2		NA	Trypanosoma	2
Streptophyta	Pyrus	50		NA	Betabaculovirus	57		Chordata	Picoides	2		NA	Planoprotostelium	2
Streptophyta	Genlisea	50		Streptophyta	Phaseolus	56		Chordata	Papio	2		NA	Lymphocystivirus	2
Arthropoda	Tigriopus	50		Streptophyta	Oryza	56		Chordata	Pangasianodon	2		NA	Aphanomyces	2
Arthropoda	Dermacentor	50		Streptophyta	Genlisea	56		Chordata	Pan	2		Mucoromycota	Rhizopus	2
Arthropoda	Ammothella	50		Proteobacteria	Neisseria	55		Chordata	Orycteropus	2		Mucoromycota	Glomus	2
Proteobacteria	Neisseria	49		Ascomycota	Lachnellula	55		Chordata	Ornithorhynchus	2		Mollusca	Azumapecten	2
NA	Aphanomyces	49		Arthropoda	Mayetiola	55		Chordata	Numida	2		Chordata	Zalophus	2
Chordata	Rhincodon	49		Arthropoda	Leptopilina	55		Chordata	Neolamprologus	2		Chordata	Suricata	2
Arthropoda	Trichomalopsis	49		Chordata	Rhincodon	54		Chordata	Nanorana	2		Chordata	Rhinopithecus	2
Arthropoda	Orussus	49		Streptophyta	Herrania	53		Chordata	Nannospalax	2		Chordata	Rana	2
Firmicutes	Lactobacillus	48		NA	Salpingoeca	53		Chordata	Mus	2		Chordata	Pogona	2
Basidiomycota	Hebeloma	47		Cryptophyta	Guillardia	53		Chordata	Monopterus	2		Chordata	Piliocolobus	2
Ascomycota	Cyberlindnera	47		Arthropoda	Pectinophora	53		Chordata	Monodon	2		Chordata	Pangasianodon	2
Acidobacteria	NA	47		Platyhelminthes	Trichobilharzia	52		Chordata	Melopsittacus	2		Chordata	Opisthocomus	2
Cyanobacteria	Microcystis	46		Arthropoda	Oryctes	52		Chordata	Hippocampus	2		Chordata	Nipponia	2
Arthropoda	Leptopilina	46		Streptophyta	Trifolium	51		Chordata	Felis	2		Chordata	Nanorana	2
Arthropoda	Acromyrmex	46		Streptophyta	Beta	51		Chordata	Falco	2		Chordata	Monopterus	2
Streptophyta	Populus	45		Tardigrada	Hypsibius	50		Chordata	Eurypyga	2		Chordata	Monodelphis	2
Streptophyta	Erythranthe	45		Rotifera	Brachionus	50		Chordata	Electrophorus	2		Chordata	Mesitornis	2
Chordata	Monopterus	45		Chordata	Pundamilia	50		Chordata	Dromaius	2		Chordata	Meleagris	2
Arthropoda	Pogonomyrmex	45		NA	Avihepadnavirus	49		Chordata	Dicentrarchus	2		Chordata	Marmota	2
Chordata	Camelus	44		Chordata	Myotis	49		Chordata	Crocodylus	2		Chordata	Macaca	2
Arthropoda	Galleria	44		Basidiomycota	Cryptococcus	49		Chordata	Cottoperca	2		Chordata	Loxodonta	2
Arthropoda	Fopius	44		Arthropoda	Trichomalopsis	48		Chordata	Corvus	2		Chordata	Lonchura	2
Streptophyta	Beta	43		Arthropoda	Galleria	48		Chordata	Corapipo	2		Chordata	Heterocephalus	2
Streptophyta	Zostera	42		NA	Aphanomyces	47		Chordata	Charadrius	2		Chordata	Haliaeetus	2
Streptophyta	Marshallia	42		Arthropoda	Pogonomyrmex	47		Chordata	Chaetura	2		Chordata	Galeopterus	2
Proteobacteria	Pseudomonas	41		Streptophyta	Helianthus	46		Chordata	Cercocebus	2		Chordata	Felis	2
NA	Symbiodinium	41		Proteobacteria	Escherichia	46		Chordata	Callorhinchus	2		Chordata	Electrophorus	2
Firmicutes	Clostridioides	41		Negarnaviricota	Orthonairovirus	46		Chordata	Callipepla	2		Chordata	Cottoperca	2
Arthropoda	Nasutitermes	40		Chordata	Rattus	46		Chordata	Bambusicola	2		Chordata	Corvus	2
Arthropoda	Mayetiola	40		Chordata	Echeneis	46		Chordata	Anas	2		Chordata	Chinchilla	2
Actinobacteria	Labedella	40		Streptophyta	Populus	45		Basidiomycota	Hericium	2		Chordata	Chaetura	2
NA	Betabaculovirus	39		Proteobacteria	Methylomicrobium	45		Ascomycota	Pseudogymnoascus	2		Chordata	Cavia	2
Basidiomycota	Agaricus	39		Proteobacteria	Alcanivorax	45		Ascomycota	Penicillium	2		Chordata	Callorhinchus	2
Proteobacteria	Pararhodospirillum	38		Ascomycota	Rasamsonia	45		Arthropoda	Trichomalopsis	2		Chordata	Bos	2
Proteobacteria	Occidentia	38		Arthropoda	Pieris	45		Arthropoda	Pilumnus	2		Chordata	Betta	2
Nematoda	Diploscapter	38		Acidobacteria	NA	45		Arthropoda	Locusta	2		Chordata	Bagarius	2
Crenarchaeota	Saccharolobus	38		Streptophyta	Camellia	44		Arthropoda	Lepidurus	2		Chordata	Aotus	2
Chordata	Picoides	38		Basidiomycota	Agaricus	44		Arthropoda	Ceriodaphnia	2		Chordata	Anser	2
Chordata	Myotis	38		Arthropoda	Agrotis	44		Arthropoda	Athalia	2		Chordata	Anas	2
Arthropoda	Melipona	38		Firmicutes	Clostridioides	43		Arthropoda	Aethina	2		Chordata	Amazona	2
Arthropoda	Tropidoderus	37		Ascomycota	Ophiocordyceps	43		Actinobacteria	Nocardia	2		Chordata	Ailuropoda	2
Arthropoda	Sarcoptes	37		Ascomycota	Cyberlindnera	43		Actinobacteria	Labedella	2		Basidiomycota	Dentipellis	2
Arthropoda	Pieris	37		Proteobacteria	Photobacterium	42		Zoopagomycota	Smittium	1		Basidiomycota	Cryptococcus	2
Arthropoda	Agathemera	37		Nematoda	Dracunculus	42		Streptophyta	Tarenaya	1		Bacteroidetes	Flavobacterium	2
Porifera	Axinella	36		Chordata	Ictalurus	42		Streptophyta	Sorghum	1		Bacteroidetes	Candidatus	2
Nematoda	Acanthocheilonema	36		Chordata	Athene	42		Streptophyta	Salvia	1		Arthropoda	Simocephalus	2
Streptophyta	Nicotiana	35		Arthropoda	Dermacentor	42		Streptophyta	Prunus	1		Arthropoda	Polistes	2
Chordata	Oikopleura	35		Arthropoda	Pycnoscelus	41		Streptophyta	Panicum	1		Arthropoda	Orussus	2
Ascomycota	Rasamsonia	35		Streptophyta	Marshallia	40		Streptophyta	Nicotiana	1		Arthropoda	Microplitis	2
Ascomycota	Lachnellula	35		Arthropoda	Fopius	40		Streptophyta	Mucuna	1		Arthropoda	Melipona	2
Streptophyta	Brassica	34		Streptophyta	Pyrus	38		Streptophyta	Momordica	1		Arthropoda	Lucilia	2
Proteobacteria	Photobacterium	34		Nematoda	Gongylonema	38		Streptophyta	Medicago	1		Arthropoda	Lepeophtheirus	2
Chordata	Equus	34		Chordata	Equus	38		Streptophyta	Marchantia	1		Arthropoda	Lasiocampa	2
Proteobacteria	Alcanivorax	33		Basidiomycota	Phlebia	38		Streptophyta	Malus	1		Arthropoda	Diasemopsis	2
Platyhelminthes	Fasciola	33		Arthropoda	Danaus	38		Streptophyta	Eutrema	1		Arthropoda	Danaus	2
Nematoda	Onchocerca	33		Nematoda	Diploscapter	37		Streptophyta	Dendrobium	1		Arthropoda	Cupiennius	2
Cryptophyta	Guillardia	33		Crenarchaeota	Saccharolobus	37		Streptophyta	Cucumis	1		Arthropoda	Chironomus	2
Arthropoda	Pycnoscelus	33		Ascomycota	Aspergillus	37		Streptophyta	Chenopodium	1		Arthropoda	Athalia	2
Arthropoda	Locusta	33		Chordata	Camelus	36		Streptophyta	Brassica	1		Arthropoda	Argas	2
Arthropoda	Archiearis	33		Arthropoda	Locusta	36		Streptophyta	Brachypodium	1		Arthropoda	Anticarsia	2
Actinobacteria	Nocardia	33		Actinobacteria	Labedella	36		Streptophyta	Beta	1		Arthropoda	Aethina	2
Streptophyta	Rosa	32		Arthropoda	Melipona	35		Streptophyta	Asparagus	1		Apicomplexa	Babesia	2
Chordata	Melopsittacus	32		Arthropoda	Halyomorpha	35		Streptophyta	Arachis	1		Tardigrada	Hypsibius	1
Arthropoda	Zeugodacus	32		Streptophyta	Glycine	34		Streptophyta	Apostasia	1		Streptophyta	Zostera	1
Arthropoda	Halyomorpha	32		Proteobacteria	Stenotrophomonas	34		Proteobacteria	Salmonella	1		Streptophyta	Ziziphus	1
Proteobacteria	Wolbachia	31		Planctomycetes	NA	34		Proteobacteria	Paracaedibacteraceae	1		Streptophyta	Zea	1
NA	Salpingoeca	31		Cyanobacteria	Microcystis	34		Proteobacteria	Neisseria	1		Streptophyta	Vitis	1
Apicomplexa	Cystoisospora	31		Chordata	Macaca	34		Proteobacteria	Erwinia	1		Streptophyta	Vigna	1
Streptophyta	Physcomitrella	30		Arthropoda	Archiearis	34		Proteobacteria	Desulfocapsa	1		Streptophyta	Trifolium	1
Placozoa	Trichoplax	30		Proteobacteria	Occidentia	33		Platyhelminthes	Protopolystoma	1		Streptophyta	Spinacia	1
Chordata	Oryctolagus	30		Proteobacteria	Curvibacter	33		Platyhelminthes	Fasciolopsis	1		Streptophyta	Sorghum	1
Chordata	Castor	30		NA	Symbiodinium	33		Platyhelminthes	Fasciola	1		Streptophyta	Solanum	1
Ascomycota	Aspergillus	30		Chordata	Gopherus	33		Planctomycetes	NA	1		Streptophyta	Selaginella	1
Streptophyta	Glycine	29		Basidiomycota	Peniophora	33		Placozoa	Trichoplax	1		Streptophyta	Salvia	1
Proteobacteria	Stenotrophomonas	29		Arthropoda	Zeugodacus	33		Orthonectida	Intoshia	1		Streptophyta	Pyrus	1
Chordata	Athene	29		Streptophyta	Brassica	32		Nematoda	Thelazia	1		Streptophyta	Prunus	1
Ascomycota	Ophiocordyceps	29		Chordata	Neolamprologus	32		Nematoda	Strongyloides	1		Streptophyta	Prosopis	1
Chordata	Tinamus	28		Arthropoda	Athalia	32		Nematoda	Necator	1		Streptophyta	Populus	1
Chordata	Leptonychotes	28		Platyhelminthes	Fasciola	31		Nematoda	Dracunculus	1		Streptophyta	Marshallia	1
Basidiomycota	Peniophora	28		Nematoda	Anisakis	31		Nematoda	Cylicostephanus	1		Streptophyta	Ipomoea	1
Arthropoda	Coenonympha	28		Chordata	Leptonychotes	31		Nematoda	Angiostrongylus	1		Streptophyta	Hevea	1
Streptophyta	Panicum	27		Basidiomycota	Hebeloma	31		Negarnaviricota	Thogotovirus	1		Streptophyta	Handroanthus	1
Streptophyta	Coffea	27		Arthropoda	Ammothella	31		Negarnaviricota	Sprivivirus	1		Streptophyta	Genlisea	1
Nematoda	Dracunculus	27		Arthropoda	Agathemera	31		Negarnaviricota	Mivirus	1		Streptophyta	Fragaria	1
Mucoromycota	Absidia	27		Negarnaviricota	Mivirus	30		Negarnaviricota	Alphanemrhavirus	1		Streptophyta	Eutrema	1
Echinodermata	Pisaster	27		Arthropoda	Nasutitermes	30		NA	Symbiodinium	1		Streptophyta	Ensete	1
Chordata	Rattus	27		Actinobacteria	Streptomyces	30		NA	Planoprotostelium	1		Streptophyta	Dendrobium	1
Arthropoda	Danaus	27		Streptophyta	Rosa	29		NA	Phytomonas	1		Streptophyta	Cucumis	1
Streptophyta	Camellia	26		Streptophyta	Citrus	29		NA	Capsaspora	1		Streptophyta	Camellia	1
Platyhelminthes	Protopolystoma	26		Streptophyta	Asparagus	29		NA	Angomonas	1		Streptophyta	Cajanus	1
Mollusca	Mytilus	26		Proteobacteria	Fluoribacter	29		Mucoromycota	Parasitella	1		Streptophyta	Beta	1
Chordata	Callorhinchus	26		Porifera	Axinella	29		Mucoromycota	Mucor	1		Spirochaetes	Borrelia	1
Chloroflexi	NA	26		Chordata	Tupaia	29		Mucoromycota	Lichtheimia	1		Rotifera	Brachionus	1
Actinobacteria	Mycobacterium	26		Actinobacteria	Nocardia	29		Mucoromycota	Jimgerdemannia	1		Proteobacteria	Photobacterium	1
Streptophyta	Citrus	25		Streptophyta	Physcomitrella	28		Mollusca	Pinctada	1		Proteobacteria	Pantoea	1
Streptophyta	Arachis	25		Streptophyta	Mucuna	28		Mollusca	Haliotis	1		Proteobacteria	Oceanospirillum	1
Mollusca	Azumapecten	25		Streptophyta	Coffea	28		Mollusca	Barbatia	1		Proteobacteria	Morganella	1
Chordata	Ictalurus	25		Chordata	Pteropus	28		Microsporidia	Hamiltosporidium	1		Proteobacteria	Escherichia	1
Streptophyta	Mucuna	24		Chordata	Nycticebus	28		Microsporidia	Amphiamblys	1		Proteobacteria	Cycloclasticus	1
Streptophyta	Dendrobium	24		Chlorophyta	Gonium	28		Firmicutes	Ruminococcus	1		Platyhelminthes	Trichobilharzia	1
Proteobacteria	Methylomicrobium	24		Arthropoda	Triuncina	28		Firmicutes	Epulopiscium	1		Platyhelminthes	Protopolystoma	1
NA	Avihepadnavirus	24		Apicomplexa	Gregarina	28		Firmicutes	Clostridium	1		Platyhelminthes	Echinococcus	1
Chordata	Gopherus	24		Streptophyta	Arachis	27		Firmicutes	Carnobacterium	1		Planctomycetes	NA	1
Arthropoda	Agrotis	24		Basidiomycota	Ceraceosorus	27		Echinodermata	Heliocidaris	1		Nematoda	Strongylus	1
Streptophyta	Cynara	23		Arthropoda	Proasellus	27		Deinococcus	Thermus	1		Nematoda	Pristionchus	1
Nematoda	Strongyloides	23		Arthropoda	Asellus	27		Crenarchaeota	NA	1		Nematoda	Necator	1
Mollusca	Placopecten	23		Streptophyta	Nicotiana	26		Chytridiomycota	Powellomyces	1		Nematoda	Enterobius	1
Chordata	Tupaia	23		Negarnaviricota	Vesiculovirus	26		Chytridiomycota	Piromyces	1		NA	Trichomonas	1
Chordata	Macaca	23		Ctenophora	Mnemiopsis	26		Chytridiomycota	Neocallimastix	1		NA	Totivirus	1
Basidiomycota	Phlebia	23		Chordata	Charadrius	26		Chordata	Zalophus	1		NA	Salpingoeca	1
Ctenophora	Mnemiopsis	22		Basidiomycota	Wallemia	26		Chordata	Urocitellus	1		NA	Pythium	1
Proteobacteria	Oceanospirillum	21		Arthropoda	Tropidoderus	26		Chordata	Struthio	1		NA	Plasmodiophora	1
Proteobacteria	Curvibacter	21		Apicomplexa	Cystoisospora	26		Chordata	Sphaeramia	1		NA	Pestivirus	1
Chordata	Eptesicus	21		Negarnaviricota	Quaranjavirus	25		Chordata	Sousa	1		NA	Perkinsela	1
Chordata	Canis	21		Arthropoda	Sarcoptes	25		Chordata	Serinus	1		NA	Monosiga	1
Ascomycota	Ascosphaera	21		Arthropoda	Coenonympha	25		Chordata	Scophthalmus	1		NA	Leishmania	1
Arthropoda	Sarcophaga	21		Streptophyta	Dendrobium	24		Chordata	Saimiri	1		NA	Achlya	1
Arthropoda	Hottentotta	21		Proteobacteria	Oceanospirillum	24		Chordata	Rousettus	1		Mucoromycota	Jimgerdemannia	1
Chordata	Rana	20		Mollusca	Haliotis	24		Chordata	Rhinopithecus	1		Mollusca	Placopecten	1
Chordata	Gambusia	20		Arthropoda	Heliconius	24		Chordata	Rana	1		Mollusca	Lymnaea	1
Chordata	Calypte	20		Streptophyta	Manihot	23		Chordata	Puma	1		Mollusca	Haliotis	1
Basidiomycota	Hericium	20		Chordata	Mesitornis	23		Chordata	Pogona	1		Mollusca	Doryteuthis	1
Apicomplexa	Gregarina	20		Basidiomycota	Sparassis	23		Chordata	Podiceps	1		Microsporidia	Nosema	1
Zoopagomycota	Smittium	19		Basidiomycota	Armillaria	23		Chordata	Platysternon	1		Microsporidia	Enterocytozoon	1
Proteobacteria	Burkholderia	19		Thaumarchaeota	NA	22		Chordata	Physeter	1		Microsporidia	Amphiamblys	1
Planctomycetes	NA	19		Streptophyta	Sorghum	22		Chordata	Phascolarctos	1		Firmicutes	Clostridioides	1
Negarnaviricota	Mivirus	19		Nematoda	Strongyloides	22		Chordata	Phalacrocorax	1		Firmicutes	Carnobacterium	1
Chordata	Pangasianodon	19		Chytridiomycota	Powellomyces	22		Chordata	Phaethon	1		Echinodermata	Pisaster	1
Chordata	Manacus	19		Chordata	Gambusia	22		Chordata	Petromyzon	1		Echinodermata	Heliocidaris	1
Ascomycota	Pseudogymnoascus	19		Chloroflexi	NA	22		Chordata	Patagioenas	1		Deinococcus	Thermus	1
Arthropoda	Pilumnus	19		Streptophyta	Marchantia	21		Chordata	Parus	1		Ctenophora	Mnemiopsis	1
Arthropoda	Athalia	19		Streptophyta	Cynara	21		Chordata	Odobenus	1		Crenarchaeota	NA	1
Thaumarchaeota	NA	18		Proteobacteria	Candidatus+Hodgkinia	21		Chordata	Ochotona	1		Chordata	Zonotrichia	1
Streptophyta	Asparagus	18		Mucoromycota	Absidia	21		Chordata	Nestor	1		Chordata	Tursiops	1
Nematoda	Oesophagostomum	18		Mollusca	Placopecten	21		Chordata	Mustela	1		Chordata	Tamandua	1
Nematoda	Enterobius	18		Chordata	Lepidothrix	21		Chordata	Mesitornis	1		Chordata	Sturnus	1
Chordata	Struthio	18		Chordata	Cervus	21		Chordata	Macaca	1		Chordata	Struthio	1
Basidiomycota	Melampsora	18		Chordata	Calypte	21		Chordata	Lynx	1		Chordata	Strigops	1
Basidiomycota	Ceraceosorus	18		Basidiomycota	Mycena	21		Chordata	Loxodonta	1		Chordata	Sphaeramia	1
Arthropoda	Triuncina	18		Arthropoda	Glypta	21		Chordata	Lonchura	1		Chordata	Rousettus	1
Arthropoda	Heliconius	18		Nematoda	Soboliphyme	20		Chordata	Leptosomus	1		Chordata	Rhincodon	1
Streptophyta	Zea	17		NA	Dictyostelium	20		Chordata	Lagenorhynchus	1		Chordata	Python	1
Streptophyta	Sorghum	17		Mucoromycota	Lichtheimia	20		Chordata	Ictidomys	1		Chordata	Puma	1
Platyhelminthes	Mesocestoides	17		Echinodermata	Pisaster	20		Chordata	Heterocephalus	1		Chordata	Pteropus	1
Firmicutes	Lysinibacillus	17		Chordata	Oryctolagus	20		Chordata	Haliaeetus	1		Chordata	Platysternon	1
Chordata	Trichechus	17		Chlorophyta	Chlamydomonas	20		Chordata	Gorilla	1		Chordata	Physeter	1
Chordata	Pteropus	17		Ascomycota	Pseudogymnoascus	20		Chordata	Gopherus	1		Chordata	Phyllostomus	1
Chordata	Phascolarctos	17		Arthropoda	Bothriocroton	20		Chordata	Geospiza	1		Chordata	Phoenicopterus	1
Chordata	Neolamprologus	17		Proteobacteria	Agrobacterium	19		Chordata	Gavialis	1		Chordata	Petromyzon	1
Chordata	Mesitornis	17		Chordata	Tinamus	19		Chordata	Fukomys	1		Chordata	Patagioenas	1
Chordata	Gallus	17		Chordata	Chlorocebus	19		Chordata	Ficedula	1		Chordata	Parus	1
Chordata	Apaloderma	17		Chordata	Castor	19		Chordata	Eptesicus	1		Chordata	Paralichthys	1
Chlorophyta	Gonium	17		Chordata	Acanthochelys	19		Chordata	Eonycteris	1		Chordata	Papio	1
Proteobacteria	Agrobacterium	16		Arthropoda	Sarcophaga	19		Chordata	Elaphe	1		Chordata	Panthera	1
Nematoda	Cylicostephanus	16		Proteobacteria	Methyloceanibacter	18		Chordata	Dipodomys	1		Chordata	Orycteropus	1
Chordata	Meleagris	16		Proteobacteria	Desulfovibrio	18		Chordata	Denticeps	1		Chordata	Ornithorhynchus	1
Chordata	Gulo	16		Placozoa	Trichoplax	18		Chordata	Delphinapterus	1		Chordata	Ophiophagus	1
Chordata	Elephantulus	16		Nematoda	Pristionchus	18		Chordata	Condylura	1		Chordata	Odocoileus	1
Chordata	Charadrius	16		Mollusca	Mytilus	18		Chordata	Chrysochloris	1		Chordata	Odobenus	1
Candidatus+Bathyarchaeota	NA	16		Mollusca	Azumapecten	18		Chordata	Chlorocebus	1		Chordata	Numida	1
Basidiomycota	Termitomyces	16		Chordata	Oikopleura	18		Chordata	Chlamydotis	1		Chordata	Nothoprocta	1
Basidiomycota	Armillaria	16		Chordata	Carlito	18		Chordata	Cervus	1		Chordata	Nestor	1
Streptophyta	Prosopis	15		Candidatus+Bathyarchaeota	NA	18		Chordata	Ceratotherium	1		Chordata	Neomonachus	1
Chordata	Nycticebus	15		Proteobacteria	Orientia	17		Chordata	Castor	1		Chordata	Monodon	1
Chordata	Lepisosteus	15		Mucoromycota	Glomus	17		Chordata	Cariama	1		Chordata	Microtus	1
Chordata	Dasypus	15		Chordata	Rhinopithecus	17		Chordata	Buceros	1		Chordata	Microcebus	1
Chordata	Cottoperca	15		Chordata	Gallus	17		Chordata	Bagarius	1		Chordata	Manis	1
Chordata	Acanthochelys	15		Chordata	Colinus	17		Chordata	Aquila	1		Chordata	Manacus	1
Ascomycota	Saitoella	15		Basidiomycota	Termitomyces	17		Chordata	Apteryx	1		Chordata	Lynx	1
Arthropoda	Stomoxys	15		Basidiomycota	Melampsora	17		Chordata	Aptenodytes	1		Chordata	Labrus	1
Arthropoda	Aethina	15		Arthropoda	Pilumnus	17		Chordata	Antrostomus	1		Chordata	Gorilla	1
Actinobacteria	Aeromicrobium	15		Streptophyta	Zea	16		Chordata	Amazona	1		Chordata	Gopherus	1
Streptophyta	Triticum	14		Streptophyta	Solanum	16		Chordata	Ailuropoda	1		Chordata	Gavialis	1
Streptophyta	Rhodamnia	14		Streptophyta	Panicum	16		Chlorophyta	Tetrabaena	1		Chordata	Gallus	1
Nematoda	Soboliphyme	14		Nematoda	Cylicostephanus	16		Chlorophyta	Micromonas	1		Chordata	Fukomys	1
NA	Acanthamoeba	14		Chordata	Pangasianodon	16		Chloroflexi	NA	1		Chordata	Falco	1
Chordata	Sphaeramia	14		Chordata	Corvus	16		Basidiomycota	Trametes	1		Chordata	Eurypyga	1
Chordata	Pogona	14		Candidatus+Marinimicrobia	NA	16		Basidiomycota	Tilletia	1		Chordata	Eptesicus	1
Chordata	Otolemur	14		Basidiomycota	Fomitopsis	16		Basidiomycota	Rhizoctonia	1		Chordata	Epinephelus	1
Chlorophyta	Micractinium	14		Arthropoda	Lepidurus	16		Basidiomycota	Peniophora	1		Chordata	Empidonax	1
Basidiomycota	Pseudomicrostroma	14		Arthropoda	Ceratitis	16		Basidiomycota	Grifola	1		Chordata	Egretta	1
Basidiomycota	Fomitopsis	14		Streptophyta	Hevea	15		Basidiomycota	Dentipellis	1		Chordata	Dipodomys	1
Arthropoda	Lasiocampa	14		Proteobacteria	Xylella	15		Basidiomycota	Auricularia	1		Chordata	Dicentrarchus	1
Arthropoda	Glypta	14		Proteobacteria	Burkholderia	15		Basidiomycota	Armillaria	1		Chordata	Denticeps	1
Streptophyta	Manihot	13		Platyhelminthes	Hydatigera	15		Basidiomycota	Antrodiella	1		Chordata	Dasypus	1
Streptophyta	Dorcoceras	13		Chordata	Tauraco	15		Bacteroidetes	Larkinella	1		Chordata	Colobus	1
Mucoromycota	Glomus	13		Chordata	Sphaeramia	15		Bacteroidetes	Flavobacterium	1		Chordata	Colius	1
Mucoromycota	Diversispora	13		Chordata	Heterocephalus	15		Bacteroidetes	Candidatus	1		Chordata	Colinus	1
Mollusca	Haliotis	13		Chordata	Gulo	15		Ascomycota	Umbilicaria	1		Chordata	Chlamydotis	1
Chordata	Platysternon	13		Chordata	Eptesicus	15		Ascomycota	Sclerotinia	1		Chordata	Charadrius	1
Chordata	Nannospalax	13		Basidiomycota	Trichosporon	15		Ascomycota	Pyrenophora	1		Chordata	Cercocebus	1
Chordata	Cervus	13		Basidiomycota	Microbotryum	15		Ascomycota	Naumovozyma	1		Chordata	Cebus	1
Basidiomycota	Tremella	13		Arthropoda	Lasiocampa	15		Ascomycota	Golovinomyces	1		Chordata	Castor	1
Arthropoda	Lepidurus	13		Arthropoda	Hottentotta	15		Ascomycota	Cyberlindnera	1		Chordata	Calypte	1
Arthropoda	Haplopelma	13		Streptophyta	Rhodamnia	14		Ascomycota	Arthrobotrys	1		Chordata	Callorhinus	1
Streptophyta	Cuscuta	12		Proteobacteria	Brucella	14		Arthropoda	Stomoxys	1		Chordata	Callithrix	1
Proteobacteria	Fluoribacter	12		Platyhelminthes	Mesocestoides	14		Arthropoda	Sphinctomyrmex	1		Chordata	Calidris	1
Nematoda	Wuchereria	12		Nematoda	Enterobius	14		Arthropoda	Sirex	1		Chordata	Buceros	1
NA	Dictyostelium	12		Firmicutes	Lactobacillus	14		Arthropoda	Sericoderus	1		Chordata	Athene	1
NA	Capsaspora	12		Chordata	Rana	14		Arthropoda	Scylla	1		Chordata	Aptenodytes	1
Mucoromycota	Lichtheimia	12		Chordata	Pan	14		Arthropoda	Scopula	1		Chordata	Apaloderma	1
Microsporidia	Nosema	12		Chordata	Melopsittacus	14		Arthropoda	Scaptodrosophila	1		Chordata	Antrostomus	1
Microsporidia	Amphiamblys	12		Chordata	Dasypus	14		Arthropoda	Rhizonium	1		Chordata	Acanthochelys	1
Chytridiomycota	Powellomyces	12		Chordata	Chinchilla	14		Arthropoda	Pristoderus	1		Chlorophyta	Tetrabaena	1
Chordata	Urocitellus	12		Chordata	Callorhinchus	14		Arthropoda	Podura	1		Chlorophyta	Micromonas	1
Chordata	Ophiophagus	12		Chordata	Antrostomus	14		Arthropoda	Pieris	1		Chlorophyta	Chlamydomonas	1
Chordata	Falco	12		Ascomycota	Naumovozyma	14		Arthropoda	Pectinophora	1		Basidiomycota	Ustilago	1
Chordata	Corvus	12		Arthropoda	Haplopelma	14		Arthropoda	Ornithodoros	1		Basidiomycota	Trichosporon	1
Chordata	Cariama	12		Arthropoda	Cupiennius	14		Arthropoda	NA	1		Basidiomycota	Rhizoctonia	1
Chordata	Anas	12		Perkinsozoa	Perkinsus	13		Arthropoda	Mythimna	1		Basidiomycota	Puccinia	1
Basidiomycota	Sparassis	12		Negarnaviricota	Alphanemrhavirus	13		Arthropoda	Microplitis	1		Basidiomycota	Peniophora	1
Ascomycota	NA	12		Mucoromycota	Diversispora	13		Arthropoda	Melitaea	1		Basidiomycota	Panaeolus	1
Ascomycota	Fusarium	12		Mollusca	Ostrea	13		Arthropoda	Melipona	1		Basidiomycota	Neolentinus	1
Arthropoda	Proasellus	12		Chordata	Platysternon	13		Arthropoda	Mayetiola	1		Basidiomycota	Laetiporus	1
Arthropoda	Calliphora	12		Chordata	Paralichthys	13		Arthropoda	Mastigoproctus	1		Basidiomycota	Jaapia	1
Arthropoda	Acartia	12		Chordata	Gavialis	13		Arthropoda	Kalotermes	1		Basidiomycota	Gymnopilus	1
Streptophyta	Corchorus	11		Chordata	Apaloderma	13		Arthropoda	Heliconius	1		Basidiomycota	Ganoderma	1
Proteobacteria	Candidatus+Hodgkinia	11		Ascomycota	Saitoella	13		Arthropoda	Glypta	1		Basidiomycota	Ceraceosorus	1
Negarnaviricota	Vesiculovirus	11		Arthropoda	Calliptamus	13		Arthropoda	Euscorpius	1		Ascomycota	Tortispora	1
Mucoromycota	Mortierella	11		Streptophyta	Prosopis	12		Arthropoda	Euphausia	1		Ascomycota	Chaetomium	1
Chordata	Saimiri	11		Streptophyta	Corchorus	12		Arthropoda	Eriocheir	1		Ascomycota	Aspergillus	1
Chordata	Dromaius	11		Proteobacteria	Thalassococcus	12		Arthropoda	Clunio	1		Arthropoda	Zeugodacus	1
Chordata	Chrysochloris	11		Proteobacteria	Asaia	12		Arthropoda	Chiasmia	1		Arthropoda	Tityus	1
Chordata	Chlorocebus	11		Orthonectida	Intoshia	12		Arthropoda	Blacus	1		Arthropoda	Tetraponera	1
Chordata	Antrostomus	11		Chordata	Sousa	12		Arthropoda	Agrotis	1		Arthropoda	Teleopsis	1
Chlorophyta	Chlamydomonas	11		Chordata	Papio	12		Arthropoda	Abacion	1		Arthropoda	Sirex	1
Arthropoda	Forficula	11		Chordata	Otolemur	12		Apicomplexa	Theileria	1		Arthropoda	Sarcophaga	1
Arthropoda	Abraxas	11		Chordata	Opisthocomus	12		Annelida	Eurythoe	1		Arthropoda	Rhynchosciara	1
Streptophyta	Arabidopsis	10		Chordata	Mesocricetus	12		Actinobacteria	Mycobacteroides	1		Arthropoda	Psoroptes	1
Proteobacteria	Morganella	10		Chordata	Liparis	12						Arthropoda	Pristoderus	1
Proteobacteria	Asaia	10		Chordata	Lepisosteus	12						Arthropoda	Podura	1
Orthonectida	Intoshia	10		Chordata	Fukomys	12						Arthropoda	Pilumnus	1
Negarnaviricota	Alphanemrhavirus	10		Basidiomycota	Antrodiella	12						Arthropoda	Paraparatrechina	1
Mucoromycota	Parasitella	10		Ascomycota	Penicillium	12						Arthropoda	Pantala	1
Chordata	Neotoma	10		Arthropoda	Bacillus	12						Arthropoda	Nomada	1
Chordata	Miniopterus	10		Streptophyta	Lupinus	11						Arthropoda	Mycetophagus	1
Chordata	Microcebus	10		Streptophyta	Dorcoceras	11						Arthropoda	Moina	1
Chordata	Loxodonta	10		Streptophyta	Aegilops	11						Arthropoda	Mayetiola	1
Chordata	Heterocephalus	10		Proteobacteria	Aeromonas	11						Arthropoda	Lithobius	1
Chordata	Haliaeetus	10		Microsporidia	Amphiamblys	11						Arthropoda	Heterometrus	1
Chordata	Gorilla	10		Firmicutes	Intestinibacter	11						Arthropoda	Glypta	1
Chordata	Betta	10		Chordata	Phascolarctos	11						Arthropoda	Dolomedes	1
Ascomycota	Nakaseomyces	10		Chordata	Monodon	11						Arthropoda	Dermanyssus	1
Arthropoda	Archaeocroton	10		Chordata	Lonchura	11						Arthropoda	Coenonympha	1
Streptophyta	Theobroma	9		Chordata	Cottoperca	11						Arthropoda	Ceriodaphnia	1
Streptophyta	Prunus	9		Chordata	Canis	11						Arthropoda	Ceratosolen	1
Streptophyta	Pisum	9		Chordata	Bambusicola	11						Arthropoda	Blacus	1
Streptophyta	Marchantia	9		Chordata	Anas	11						Arthropoda	Bacillus	1
Streptophyta	Gentiana	9		Basidiomycota	Tulasnella	11						Arthropoda	Asthenidia	1
Spirochaetes	Borrelia	9		Basidiomycota	Tremella	11						Arthropoda	Aoteapsyche	1
Proteobacteria	Komagataeibacter	9		Basidiomycota	Hericium	11						Arthropoda	Altica	1
Proteobacteria	Desulfovibrio	9		Ascomycota	Metacordyceps	11						Arthropoda	Agrius	1
Proteobacteria	Corallococcus	9		Ascomycota	Fusarium	11						Apicomplexa	Neospora	1
Platyhelminthes	Fasciolopsis	9		Arthropoda	Membracis	11						Apicomplexa	Eimeria	1
Perkinsozoa	Perkinsus	9		Zoopagomycota	Smittium	10						Annelida	Sabellastarte	1
Nematoda	Necator	9		Proteobacteria	Komagataeibacter	10						Actinobacteria	Nocardia	1
NA	Blastocystis	9		Proteobacteria	Corallococcus	10						Actinobacteria	Labedella	1
Mollusca	Ostrea	9		Nematoda	Necator	10						Acidobacteria	NA	1
Chordata	Rhinopithecus	9		NA	Capsaspora	10
Chordata	Python	9		Mucoromycota	Parasitella	10
Chordata	Liparis	9		Microsporidia	Nosema	10
Chordata	Leptosomus	9		Firmicutes	Lysinibacillus	10
Chordata	Grammistes	9		Chordata	Zalophus	10
Chordata	Gavialis	9		Chordata	Pogona	10
Chordata	Desmodus	9		Chordata	Phalacrocorax	10
Chordata	Crocodylus	9		Chordata	Grammistes	10
Chordata	Buceros	9		Chordata	Dipodomys	10
Chordata	Aquila	9		Basidiomycota	Phellinidium	10
Chordata	Amazona	9		Basidiomycota	Dentipellis	10
Candidatus+Marinimicrobia	NA	9		Arthropoda	Forficula	10
Basidiomycota	Fibularhizoctonia	9		Arthropoda	Asthenidia	10
Bacteroidetes	Hymenobacter	9		Arthropoda	Archaeocroton	10
Ascomycota	Arthrobotrys	9		Actinobacteria	Mycobacterium	10
Arthropoda	Phengaris	9		Streptophyta	Juglans	9
Arthropoda	Ceratitis	9		Streptophyta	Handroanthus	9
Streptophyta	Ipomoea	8		Streptophyta	Eutrema	9
Spirochaetes	Leptospira	8		Streptophyta	Daucus	9
Proteobacteria	Xylella	8		Streptophyta	Ananas	9
Proteobacteria	Haemophilus	8		Proteobacteria	Cycloclasticus	9
Proteobacteria	Aureimonas	8		Proteobacteria	Caedimonas	9
Chordata	Paralichthys	8		Platyhelminthes	Fasciolopsis	9
Chordata	Nothoprocta	8		Nematoda	Angiostrongylus	9
Chordata	Mesocricetus	8		NA	Vitrella	9
Chordata	Lonchura	8		Firmicutes	Desulfosporosinus	9
Chordata	Felis	8		Chordata	Urocitellus	9
Chordata	Empidonax	8		Chordata	Trichechus	9
Chordata	Colinus	8		Chordata	Struthio	9
Chordata	Cercocebus	8		Chordata	Phyllostomus	9
Basidiomycota	Phellinidium	8		Chordata	Ophiophagus	9
Ascomycota	Umbilicaria	8		Chordata	Numida	9
Ascomycota	Trichoderma	8		Chordata	Nothoprocta	9
Arthropoda	Moina	8		Chordata	Nipponia	9
Arthropoda	Ceratosolen	8		Chordata	Nannospalax	9
Arthropoda	Asthenidia	8		Chordata	Manacus	9
Arthropoda	Acrotylus	8		Chordata	Hipposideros	9
Streptophyta	Syzygium	7		Chordata	Gorilla	9
Streptophyta	Solanum	7		Chordata	Dissostichus	9
Streptophyta	Malus	7		Basidiomycota	Panaeolus	9
Streptophyta	Hevea	7		Ascomycota	Umbilicaria	9
Streptophyta	Chenopodium	7		Ascomycota	Cryomyces	9
Streptophyta	Camelina	7		Arthropoda	Stomoxys	9
Streptophyta	Abrus	7		Actinobacteria	Aeromicrobium	9
Proteobacteria	Thiothrix	7		Streptophyta	Ipomoea	8
Proteobacteria	Cycloclasticus	7		Proteobacteria	Ochrobactrum	8
Proteobacteria	Azospirillum	7		Proteobacteria	Methylomagnum	8
Proteobacteria	Aeromonas	7		Proteobacteria	Candidatus+Midichloria	8
Onychophora	Euperipatoides	7		Proteobacteria	Aurantimonas	8
Nematoda	Loa	7		Platyhelminthes	Protopolystoma	8
Nematoda	Gongylonema	7		Mollusca	Barbatia	8
Nematoda	Anisakis	7		Microsporidia	Enterocytozoon	8
NA	Pythium	7		Chordata	Suricata	8
NA	Leptomonas	7		Chordata	Saimiri	8
Cryptomycota	Rozella	7		Chordata	Miniopterus	8
Chytridiomycota	Rhizoclosmatium	7		Chordata	Lynx	8
Chordata	Scophthalmus	7		Chordata	Loxodonta	8
Chordata	Pygoscelis	7		Chordata	Galeopterus	8
Chordata	Pongo	7		Chordata	Chrysochloris	8
Chordata	Pipra	7		Chordata	Apteryx	8
Chordata	Parus	7		Candidatus+Rokubacteria	NA	8
Chordata	Orycteropus	7		Ascomycota	Nakaseomyces	8
Chordata	Monodon	7		Ascomycota	Metarhizium	8
Chordata	Lepidothrix	7		Ascomycota	Ascosphaera	8
Chordata	Geospiza	7		Arthropoda	Phengaris	8
Chordata	Elaphe	7		Arthropoda	Pandinus	8
Chordata	Dipodomys	7		Arthropoda	Ceratosolen	8
Chordata	Chaetura	7		Arthropoda	Caligus	8
Chordata	Bison	7		Streptophyta	Ziziphus	7
Chordata	Bambusicola	7		Streptophyta	Triticum	7
Basidiomycota	Wallemia	7		Streptophyta	Spinacia	7
Basidiomycota	Ustilago	7		Streptophyta	Prunus	7
Basidiomycota	Tulasnella	7		Streptophyta	Parasponia	7
Arthropoda	Scopula	7		Streptophyta	Jatropha	7
Arthropoda	Calliptamus	7		Streptophyta	Cinnamomum	7
Arthropoda	Bothriocroton	7		Streptophyta	Chenopodium	7
Apicomplexa	Theileria	7		Streptophyta	Arabis	7
Annelida	Chaetopterus	7		Spirochaetes	Borrelia	7
Actinobacteria	Streptomyces	7		Proteobacteria	Candidatus+Regiella	7
Streptophyta	Handroanthus	6		Proteobacteria	Aureimonas	7
Streptophyta	Artemisia	6		Nematoda	Strongylus	7
Streptophyta	Aegilops	6		Nematoda	Dirofilaria	7
Streptophyta	Acer	6		NA	Lymphocystivirus	7
Proteobacteria	Tepidimonas	6		NA	Blastocystis	7
Proteobacteria	Rubrivivax	6		Chordata	Neotoma	7
Proteobacteria	Piscirickettsia	6		Chordata	Meleagris	7
Proteobacteria	Candidatus+Regiella	6		Chordata	Falco	7
Proteobacteria	Caedimonas	6		Chordata	Erythrura	7
Proteobacteria	Brucella	6		Chordata	Erinaceus	7
Platyhelminthes	Hydatigera	6		Chordata	Dromaius	7
Nematoda	Thelazia	6		Chordata	Corapipo	7
Nematoda	Pristionchus	6		Chordata	Columba	7
Negarnaviricota	Quaranjavirus	6		Chordata	Callipepla	7
NA	Planoprotostelium	6		Chordata	Bison	7
NA	Physarum	6		Chordata	Acanthisitta	7
NA	Lentivirus	6		Chlorophyta	Micractinium	7
Microsporidia	Encephalitozoon	6		Basidiomycota	Dendrothele	7
Firmicutes	Paenibacillus	6		Ascomycota	Purpureocillium	7
Firmicutes	Blautia	6		Arthropoda	Ventiella	7
Cyanobacteria	Aphanizomenon	6		Arthropoda	Psoroptes	7
Crenarchaeota	Pyrobaculum	6		Arthropoda	Heterometrus	7
Chordata	Tyto	6		Arthropoda	Allothyrus	7
Chordata	Tauraco	6		Arthropoda	Acartia	7
Chordata	Physeter	6		Streptophyta	Ricinus	6
Chordata	Numida	6		Streptophyta	Quercus	6
Chordata	Nipponia	6		Streptophyta	Pisum	6
Chordata	Jaculus	6		Streptophyta	Cicer	6
Chordata	Fukomys	6		Streptophyta	Artemisia	6
Chordata	Erinaceus	6		Streptophyta	Acer	6
Chordata	Columba	6		Proteobacteria	Thiothrix	6
Chordata	Colobus	6		Proteobacteria	Candidatus+Nitrosoglobus	6
Chordata	Colius	6		Proteobacteria	Candidatus+Glomeribacter	6
Chordata	Chlamydotis	6		Nematoda	Mansonella	6
Chordata	Carlito	6		Nematoda	Dictyocaulus	6
Chordata	Callithrix	6		NA	Reticulomyxa	6
Chordata	Aotus	6		NA	Pythium	6
Chlamydiae	Chlamydia	6		NA	Physarum	6
Candidatus+Rokubacteria	NA	6		Microsporidia	Hepatospora	6
Basidiomycota	Microbotryum	6		Firmicutes	Paenibacillus	6
Basidiomycota	Dendrothele	6		Chordata	Sorex	6
Basidiomycota	Bondarzewia	6		Chordata	Sarcophilus	6
Ascomycota	Purpureocillium	6		Chordata	Python	6
Ascomycota	Cryomyces	6		Chordata	Propithecus	6
Arthropoda	Ventiella	6		Chordata	Phoenicopterus	6
Arthropoda	Podura	6		Chordata	Phaethon	6
Arthropoda	NA	6		Chordata	Echinops	6
Arthropoda	Mesosemia	6		Chordata	Aquila	6
Arthropoda	Membracis	6		Chlamydiae	Chlamydia	6
Arthropoda	Mastigoproctus	6		Basidiomycota	Pseudomicrostroma	6
Arthropoda	Lithobius	6		Basidiomycota	Pisolithus	6
Arthropoda	Cupiennius	6		Basidiomycota	Meira	6
Arthropoda	Bacillus	6		Basidiomycota	Grifola	6
Arthropoda	Anticarsia	6		Ascomycota	Corynespora	6
Actinobacteria	Microbacterium	6		Arthropoda	Toxorhynchites	6
Streptophyta	Spinacia	5		Arthropoda	Scopula	6
Streptophyta	Cupressus	5		Arthropoda	Podura	6
Streptophyta	Cicer	5		Arthropoda	Phlebotomus	6
Proteobacteria	Thalassococcus	5		Arthropoda	Kalotermes	6
Proteobacteria	Orientia	5		Arthropoda	Hemipyrellia	6
Proteobacteria	Ochrobactrum	5		Arthropoda	Aphonopelma	6
Nematoda	Dictyocaulus	5		Arthropoda	Aethina	6
NA	Plasmodiophora	5		Annelida	Platynereis	6
NA	Phytomonas	5		Annelida	Chaetopterus	6
NA	Creolimax	5		Annelida	Alvinella	6
NA	Ambidensovirus	5		Streptophyta	Tarenaya	5
Chordata	Suricata	5		Streptophyta	Sesamum	5
Chordata	Sorex	5		Streptophyta	Salvia	5
Chordata	Piliocolobus	5		Streptophyta	Raphanus	5
Chordata	Peromyscus	5		Streptophyta	Punica	5
Chordata	Pan	5		Streptophyta	Arabidopsis	5
Chordata	Ovis	5		Proteobacteria	Erwinia	5
Chordata	Opisthocomus	5		Proteobacteria	Azospirillum	5
Chordata	Neopelma	5		Negarnaviricota	Thogotovirus	5
Chordata	Hipposideros	5		Negarnaviricota	Sigmavirus	5
Chordata	Grammomys	5		NA	Emiliania	5
Chordata	Eurypyga	5		NA	Acanthamoeba	5
Chordata	Echinops	5		Mollusca	Pareledone	5
Chordata	Dissostichus	5		Mollusca	Doryteuthis	5
Chordata	Corapipo	5		Microsporidia	Encephalitozoon	5
Chordata	Ceratotherium	5		Firmicutes	Enterococcus	5
Chordata	Cebus	5		Firmicutes	Blautia	5
Chordata	Apteryx	5		Cyanobacteria	Aphanizomenon	5
Chordata	Acinonyx	5		Crenarchaeota	Acidianus	5
Chlorophyta	Tetrabaena	5		Chordata	Physeter	5
Basidiomycota	Sistotremastrum	5		Chordata	Ochotona	5
Basidiomycota	Auricularia	5		Chordata	Haliaeetus	5
Ascomycota	Talaromyces	5		Chordata	Elaphe	5
Ascomycota	Penicillium	5		Chordata	Coturnix	5
Ascomycota	Naumovozyma	5		Chordata	Chaetura	5
Ascomycota	Alternaria	5		Chordata	Cebus	5
Arthropoda	Psoroptes	5		Chordata	Betta	5
Arthropoda	Pandinus	5		Chordata	Anser	5
Arthropoda	Omocestus	5		Chlorophyta	Chlorella	5
Arthropoda	Hemipyrellia	5		Basidiomycota	Ganoderma	5
Arthropoda	Culicoides	5		Ascomycota	Dothistroma	5
Streptophyta	Ziziphus	4		Ascomycota	Chlorociboria	5
Streptophyta	Tarenaya	4		Arthropoda	Janiodes	5
Streptophyta	Punica	4		Arthropoda	Glyptapanteles	5
Streptophyta	Eutrema	4		Arthropoda	Eubosmina	5
Streptophyta	Daucus	4		Arthropoda	Dociostaurus	5
Streptophyta	Cucurbita	4		Arthropoda	Acrotylus	5
Streptophyta	Bupleurum	4		Arthropoda	Abraxas	5
Streptophyta	Brachypodium	4		Actinobacteria	Paeniglutamicibacter	5
Streptophyta	Apostasia	4		Actinobacteria	Corynebacterium	5
Proteobacteria	Turicimonas	4		Streptophyta	Nelumbo	4
Proteobacteria	Ruegeria	4		Streptophyta	Malus	4
Proteobacteria	Pseudoalteromonas	4		Streptophyta	Gentiana	4
Proteobacteria	Methyloceanibacter	4		Streptophyta	Camelina	4
Proteobacteria	Candidatus+Midichloria	4		Proteobacteria	Xinfangfangia	4
Negarnaviricota	Thogotovirus	4		Proteobacteria	Tepidimonas	4
Negarnaviricota	Sripuvirus	4		Proteobacteria	Octadecabacter	4
NA	Vitrella	4		Proteobacteria	Morganella	4
NA	Tritrichomonas	4		Proteobacteria	Aquabacter	4
NA	Reticulomyxa	4		Proteobacteria	Acetobacter	4
NA	Lymphocystivirus	4		Platyhelminthes	Taenia	4
Mucoromycota	Mucor	4		Nematoda	Setaria	4
Mucoromycota	Jimgerdemannia	4		Nematoda	NA	4
Mollusca	Georissa	4		NA	Sinsheimervirus	4
Mollusca	Euconulus	4		NA	Plasmodiophora	4
Microsporidia	Hepatospora	4		NA	Planoprotostelium	4
Microsporidia	Enterocytozoon	4		NA	Leishmania	4
Firmicutes	Intestinibacter	4		Firmicutes	Halobacillus	4
Firmicutes	Clostridium	4		Echinodermata	Paracentrotus	4
Cyanobacteria	Pseudanabaena	4		Cryptomycota	Rozella	4
Chordata	Ursus	4		Chordata	Zonotrichia	4
Chordata	Strigops	4		Chordata	Tyto	4
Chordata	Pterocles	4		Chordata	Sturnus	4
Chordata	Phyllostomus	4		Chordata	Pygoscelis	4
Chordata	Phaethon	4		Chordata	Puma	4
Chordata	Odobenus	4		Chordata	Pipra	4
Chordata	Neomonachus	4		Chordata	Pelecanus	4
Chordata	Mustela	4		Chordata	Odobenus	4
Chordata	Manis	4		Chordata	Neopelma	4
Chordata	Mandrillus	4		Chordata	Meriones	4
Chordata	Lynx	4		Chordata	Leptomelanosoma	4
Chordata	Gavia	4		Chordata	Lagenorhynchus	4
Chordata	Egretta	4		Chordata	Felis	4
Chordata	Dicentrarchus	4		Chordata	Empidonax	4
Chordata	Cyanistes	4		Chordata	Elephantulus	4
Chordata	Chinchilla	4		Chordata	Dicentrarchus	4
Chordata	Anser	4		Chordata	Colobus	4
Chordata	Anoplopoma	4		Chordata	Cercocebus	4
Basidiomycota	Pyrrhoderma	4		Chordata	Cavia	4
Basidiomycota	Pisolithus	4		Chordata	Aotus	4
Basidiomycota	Panaeolus	4		Chordata	Amazona	4
Basidiomycota	Mycena	4		Chlorophyta	Auxenochlorella	4
Basidiomycota	Moniliophthora	4		Basidiomycota	Ustilago	4
Basidiomycota	Leucoagaricus	4		Basidiomycota	Punctularia	4
Basidiomycota	Lentinula	4		Basidiomycota	Moniliophthora	4
Basidiomycota	Hypsizygus	4		Basidiomycota	Mixia	4
Basidiomycota	Gelatoporia	4		Basidiomycota	Hypsizygus	4
Basidiomycota	Dentipellis	4		Basidiomycota	Auricularia	4
Basidiomycota	Calocera	4		Bacteroidetes	Hymenobacter	4
Basidiomycota	Antrodiella	4		Ascomycota	Pyrenophora	4
Ascomycota	Pyricularia	4		Ascomycota	Kluyveromyces	4
Ascomycota	Kluyveromyces	4		Ascomycota	Hirsutella	4
Ascomycota	Hirsutella	4		Ascomycota	Cordyceps	4
Ascomycota	Elsinoe	4		Ascomycota	Arthrobotrys	4
Arthropoda	Tenebrio	4		Ascomycota	Alternaria	4
Arthropoda	Rhizonium	4		Arthropoda	Thecla	4
Arthropoda	Reticulitermes	4		Arthropoda	Scolitantides	4
Arthropoda	Nullibrotheas	4		Arthropoda	Paruroctonus	4
Arthropoda	Laophontodes	4		Arthropoda	Omocestus	4
Arthropoda	Kalotermes	4		Arthropoda	NA	4
Arthropoda	Janiodes	4		Arthropoda	Moina	4
Arthropoda	Iurus	4		Arthropoda	Mastigoproctus	4
Arthropoda	Hyalomma	4		Arthropoda	Leptopsalis	4
Arthropoda	Dysdera	4		Arthropoda	Lepeophtheirus	4
Arthropoda	Dendrolimus	4		Arthropoda	Gryllus	4
Arthropoda	Chrysomela	4		Arthropoda	Garypus	4
Arthropoda	Chorthippus	4		Arthropoda	Chorthippus	4
Arthropoda	Caligus	4		Arthropoda	Callobius	4
Arthropoda	Allothyrus	4		Arthropoda	Calliphora	4
Annelida	Platynereis	4		Arthropoda	Bdellorhynchus	4
Annelida	Eurythoe	4		Arthropoda	Aoteapsyche	4
Annelida	Alvinella	4		Arthropoda	Anurida	4
Actinobacteria	Propioniferax	4		Arthropoda	Anticarsia	4
Actinobacteria	Atopobium	4		Zoopagomycota	Thamnocephalis	3
Streptophyta	Quercus	3		Zoopagomycota	Conidiobolus	3
Streptophyta	Phalaenopsis	3		Streptophyta	Syzygium	3
Streptophyta	Momordica	3		Streptophyta	Cupressus	3
Streptophyta	Lotus	3		Streptophyta	Cephalotus	3
Streptophyta	Jatropha	3		Streptophyta	Cannabis	3
Streptophyta	Ensete	3		Spirochaetes	Leptospira	3
Streptophyta	Arabis	3		Rhodophyta	Galdieria	3
Proteobacteria	Xanthomonas	3		Proteobacteria	Xanthomonas	3
Proteobacteria	Octadecabacter	3		Proteobacteria	Thalassomonas	3
Proteobacteria	Methylomagnum	3		Proteobacteria	Rubrivivax	3
Proteobacteria	Candidatus+Nitrosoglobus	3		Proteobacteria	Halomonas	3
Proteobacteria	Candidatus+Micropelagos	3		Proteobacteria	Colwellia	3
Proteobacteria	Bradyrhizobium	3		Proteobacteria	Campylobacter	3
Proteobacteria	Acetobacter	3		Negarnaviricota	Sprivivirus	3
Platyhelminthes	Taenia	3		Negarnaviricota	Ledantevirus	3
Nematoda	Strongylus	3		Negarnaviricota	Hapavirus	3
Nematoda	Angiostrongylus	3		NA	Tritrichomonas	3
Negarnaviricota	Sprivivirus	3		NA	Phytomonas	3
NA	Kipferlia	3		NA	Perkinsela	3
NA	Cavenderia	3		NA	Lingulodinium	3
Mucoromycota	Choanephora	3		Mollusca	Carychium	3
Mollusca	Smaragdia	3		Firmicutes	Clostridium	3
Mollusca	Barbatia	3		Crenarchaeota	Sulfurisphaera	3
Microsporidia	Pseudoloma	3		Ciliophora	Paramecium	3
Echinodermata	Caenopedina	3		Chordata	Tursiops	3
Crenarchaeota	Sulfurisphaera	3		Chordata	Strigops	3
Chordata	Sturnus	3		Chordata	Pterocles	3
Chordata	Sousa	3		Chordata	Plectorhinchus	3
Chordata	Sarcophilus	3		Chordata	Panthera	3
Chordata	Rousettus	3		Chordata	Ovis	3
Chordata	Propithecus	3		Chordata	Orcinus	3
Chordata	Plectorhinchus	3		Chordata	Odocoileus	3
Chordata	Phoenicopterus	3		Chordata	Octodon	3
Chordata	Pelecanus	3		Chordata	Nestor	3
Chordata	Octodon	3		Chordata	Neophocaena	3
Chordata	Merops	3		Chordata	Microcebus	3
Chordata	Ictidomys	3		Chordata	Merops	3
Chordata	Galeopterus	3		Chordata	Manis	3
Chordata	Ficedula	3		Chordata	Mandrillus	3
Chordata	Erythrura	3		Chordata	Geospiza	3
Chordata	Denticeps	3		Chordata	Egretta	3
Chordata	Condylura	3		Chordata	Denticeps	3
Chordata	Callipepla	3		Chordata	Delphinapterus	3
Chordata	Calidris	3		Chordata	Ceratotherium	3
Chlorophyta	Auxenochlorella	3		Chordata	Cariama	3
Basidiomycota	Trichosporon	3		Chordata	Callithrix	3
Basidiomycota	Rhizopogon	3		Chordata	Calidris	3
Basidiomycota	Meira	3		Chordata	Buceros	3
Basidiomycota	Malassezia	3		Chordata	Balearica	3
Basidiomycota	Gymnopilus	3		Chordata	Aptenodytes	3
Basidiomycota	Grifola	3		Chlorophyta	Tetrabaena	3
Basidiomycota	Ganoderma	3		Chlorophyta	Micromonas	3
Ascomycota	Sclerotinia	3		Basidiomycota	Sistotremastrum	3
Ascomycota	Nannizzia	3		Basidiomycota	Scleroderma	3
Ascomycota	Metarhizium	3		Basidiomycota	Sanghuangporus	3
Ascomycota	Aureobasidium	3		Basidiomycota	Rhizopogon	3
Arthropoda	Sericothrips	3		Basidiomycota	Phanerochaete	3
Arthropoda	Scapholeberis	3		Basidiomycota	Melanopsichium	3
Arthropoda	Rhynchosciara	3		Basidiomycota	Gymnopilus	3
Arthropoda	Psathyropus	3		Basidiomycota	Fistulina	3
Arthropoda	Phlebotomus	3		Basidiomycota	Fibularhizoctonia	3
Arthropoda	Pardosa	3		Basidiomycota	Bondarzewia	3
Arthropoda	Heteropterus	3		Basidiomycota	Anthracocystis	3
Arthropoda	Heterometrus	3		Ascomycota	Talaromyces	3
Arthropoda	Heteracris	3		Ascomycota	Sclerotinia	3
Arthropoda	Glyptapanteles	3		Ascomycota	Saccharomyces	3
Arthropoda	Epimeria	3		Ascomycota	NA	3
Arthropoda	Drunella	3		Ascomycota	Chaetomium	3
Arthropoda	Dociostaurus	3		Ascomycota	Candida	3
Arthropoda	Chironomus	3		Arthropoda	Zelandoperla	3
Arthropoda	Ceriodaphnia	3		Arthropoda	Perigonia	3
Arthropoda	Blacus	3		Arthropoda	Paraparatrechina	3
Arthropoda	Anthonomus	3		Arthropoda	Nephila	3
Arthropoda	Acheta	3		Arthropoda	Liponeura	3
Zoopagomycota	Coemansia	2		Arthropoda	Kassongia	3
Zoopagomycota	Basidiobolus	2		Arthropoda	Euscorpius	3
Verrucomicrobia	Roseibacillus	2		Arthropoda	Culicoides	3
Streptophyta	Spatholobus	2		Arthropoda	Blacus	3
Streptophyta	Sesbania	2		Annelida	Chaetozone	3
Streptophyta	Sesamum	2		Actinobacteria	Atopobium	3
Streptophyta	Salvia	2		Zoopagomycota	Zancudomyces	2
Streptophyta	Picea	2		Zoopagomycota	Dimargaris	2
Streptophyta	Morus	2		Zoopagomycota	Basidiobolus	2
Streptophyta	Lupinus	2		Streptophyta	Setaria	2
Streptophyta	Juglans	2		Streptophyta	Olea	2
Streptophyta	Fragaria	2		Streptophyta	Lotus	2
Streptophyta	Eucalyptus	2		Streptophyta	Cuscuta	2
Streptophyta	Dryopteris	2		Streptophyta	Bupleurum	2
Streptophyta	Cinnamomum	2		Streptophyta	Brachypodium	2
Streptophyta	Cephalotus	2		Streptophyta	Abrus	2
Streptophyta	Cannabis	2		Rhodophyta	Solieria	2
Streptophyta	Apopellia	2		Proteobacteria	Yersinia	2
Streptophyta	Ananas	2		Proteobacteria	Turicimonas	2
Streptophyta	Amborella	2		Proteobacteria	Sphingomonas	2
Rhodophyta	Botryocladia	2		Proteobacteria	Sorangium	2
Proteobacteria	Xinfangfangia	2		Proteobacteria	Rhodobacter	2
Proteobacteria	Shewanella	2		Proteobacteria	Pelomonas	2
Proteobacteria	Salmonella	2		Proteobacteria	Pasteurella	2
Proteobacteria	Rhodopseudomonas	2		Proteobacteria	Pararhodobacter	2
Proteobacteria	Rhodobacter	2		Proteobacteria	Devosia	2
Proteobacteria	Pelomonas	2		Proteobacteria	Desulfobacterium	2
Proteobacteria	Kangiella	2		Proteobacteria	Candidatus+Pelagibacter	2
Proteobacteria	Gluconobacter	2		Proteobacteria	Aquabacterium	2
Proteobacteria	Erwinia	2		Proteobacteria	Acidovorax	2
Proteobacteria	Desulfobulbus	2		Platyhelminthes	Schmidtea	2
Proteobacteria	Desulfobacterium	2		Planctomycetes	Singulisphaera	2
Proteobacteria	Desulfobacter	2		Onychophora	Peripatus	2
Proteobacteria	Candidatus+Glomeribacter	2		NA	Totivirus	2
Proteobacteria	Aurantimonas	2		NA	Pestivirus	2
Platyhelminthes	Spathula	2		NA	Monosiga	2
Platyhelminthes	Schmidtea	2		NA	Leptomonas	2
Platyhelminthes	Notoplana	2		NA	Errantivirus	2
Platyhelminthes	Dugesia	2		NA	Bodo	2
Nemertea	Lineus	2		NA	Aureococcus	2
Nematoda	Chandlerella	2		NA	Angomonas	2
Negarnaviricota	Ledantevirus	2		NA	Achlya	2
Negarnaviricota	Ephemerovirus	2		Mucoromycota	Mucor	2
NA	Perkinsela	2		Mucoromycota	Mortierella	2
NA	Giardia	2		Mucoromycota	Gigaspora	2
NA	Emiliania	2		Mollusca	Ruditapes	2
NA	Ectocarpus	2		Mollusca	Orcula	2
NA	Angomonas	2		Mollusca	Mimachlamys	2
Mollusca	Sunetta	2		Mollusca	Megaleledone	2
Mollusca	Puncturella	2		Mollusca	Helicopsis	2
Mollusca	Pteria	2		Mollusca	Georissa	2
Mollusca	Polybranchia	2		Mollusca	Crepidula	2
Mollusca	Pinctada	2		Microsporidia	Mitosporidium	2
Mollusca	Lomanotus	2		Microsporidia	Hamiltosporidium	2
Mollusca	Carychium	2		Firmicutes	Ruminococcus	2
Ignavibacteriae	NA	2		Echinodermata	Asterias	2
Firmicutes	Virgibacillus	2		Cnidaria	Scleronephthya	2
Echinodermata	Hesperocidaris	2		Chytridiomycota	Orpinomyces	2
Echinodermata	Centrostephanus	2		Chytridiomycota	Caulochytrium	2
Deinococcus	Thermus	2		Chordata	Ursus	2
Cyanobacteria	Geitlerinema	2		Chordata	Pseudopodoces	2
Cyanobacteria	Calothrix	2		Chordata	Protopterus	2
Cyanobacteria	Anabaena	2		Chordata	Pongo	2
Cnidaria	Podocoryna	2		Chordata	Podiceps	2
Chytridiomycota	Spizellomyces	2		Chordata	Peromyscus	2
Chordata	Zonotrichia	2		Chordata	Parus	2
Chordata	Vulpes	2		Chordata	Pareiodon	2
Chordata	Tursiops	2		Chordata	Orycteropus	2
Chordata	Theropithecus	2		Chordata	Neomonachus	2
Chordata	Taeniopygia	2		Chordata	Myoxocephalus	2
Chordata	Sphyraena	2		Chordata	Mustela	2
Chordata	Solea	2		Chordata	Microtus	2
Chordata	Serinus	2		Chordata	Lipotes	2
Chordata	Salamandra	2		Chordata	Leptosomus	2
Chordata	Phalacrocorax	2		Chordata	Leptobrama	2
Chordata	Pelophylax	2		Chordata	Jaculus	2
Chordata	Papio	2		Chordata	Ictidomys	2
Chordata	Panthera	2		Chordata	Grammomys	2
Chordata	Nomascus	2		Chordata	Fulmarus	2
Chordata	Nestor	2		Chordata	Ficedula	2
Chordata	Moenkhausia	2		Chordata	Crocodylus	2
Chordata	Microtus	2		Chordata	Colius	2
Chordata	Lipotes	2		Chordata	Cathartes	2
Chordata	Leptomelanosoma	2		Chordata	Capra	2
Chordata	Leiognathus	2		Chordata	Botryllus	2
Chordata	Lagenorhynchus	2		Chordata	Balaenoptera	2
Chordata	Delphinapterus	2		Chordata	Anoplopoma	2
Chordata	Coilia	2		Chordata	Acinonyx	2
Chordata	Centrobranchus	2		Chlorophyta	Volvox	2
Chordata	Balaenoptera	2		Candidatus+Atribacteria	NA	2
Chloroflexi	Roseiflexus	2		Blastocladiomycota	Allomyces	2
Chloroflexi	Candidatus+Viridilinea	2		Basidiomycota	Sphaerobolus	2
Candidatus+Woesearchaeota	NA	2		Basidiomycota	Pyrrhoderma	2
Blastocladiomycota	Allomyces	2		Basidiomycota	Gloeophyllum	2
Basidiomycota	Scleroderma	2		Basidiomycota	Exidia	2
Basidiomycota	Sanghuangporus	2		Bacteroidetes	Labilibacter	2
Basidiomycota	Plicaturopsis	2		Bacteroidetes	Crenotalea	2
Basidiomycota	Pleurotus	2		Bacillariophyta	Thalassiosira	2
Basidiomycota	Phlebiopsis	2		Ascomycota	Yarrowia	2
Basidiomycota	Obba	2		Ascomycota	Venturia	2
Basidiomycota	Gloeophyllum	2		Ascomycota	Tortispora	2
Basidiomycota	Exidia	2		Ascomycota	Stemphylium	2
Bacteroidetes	Crenotalea	2		Ascomycota	Rachicladosporium	2
Ascomycota	Verruconis	2		Ascomycota	Pneumocystis	2
Ascomycota	Torrubiella	2		Ascomycota	Paracoccidioides	2
Ascomycota	Saccharomycodes	2		Ascomycota	Metschnikowia	2
Ascomycota	Pyrenophora	2		Ascomycota	Friedmanniomyces	2
Ascomycota	Pneumocystis	2		Ascomycota	Endocarpon	2
Ascomycota	Pichia	2		Ascomycota	Dactylellina	2
Ascomycota	Metschnikowia	2		Ascomycota	Claviceps	2
Ascomycota	Macrophomina	2		Ascomycota	Botrytis	2
Ascomycota	Komagataella	2		Ascomycota	Botryotinia	2
Ascomycota	Friedmanniomyces	2		Ascomycota	Acidomyces	2
Ascomycota	Eutypa	2		Arthropoda	Xestochironomus	2
Ascomycota	Dactylellina	2		Arthropoda	Troglarmadillo	2
Ascomycota	Cercospora	2		Arthropoda	Trimerotropis	2
Ascomycota	Ceratocystis	2		Arthropoda	Smeringurus	2
Ascomycota	Brettanomyces	2		Arthropoda	Siro	2
Ascomycota	Blumeria	2		Arthropoda	Sericothrips	2
Arthropoda	Xestochironomus	2		Arthropoda	Scytodes	2
Arthropoda	Trimerotropis	2		Arthropoda	Scolopendra	2
Arthropoda	Trigonopterus	2		Arthropoda	Psathyropus	2
Arthropoda	Toxorhynchites	2		Arthropoda	Pristoderus	2
Arthropoda	Stylopallene	2		Arthropoda	Phalangium	2
Arthropoda	Stenobothrus	2		Arthropoda	Pateena	2
Arthropoda	Spinonemia	2		Arthropoda	Pardosa	2
Arthropoda	Simocephalus	2		Arthropoda	Palaemon	2
Arthropoda	Sancus	2		Arthropoda	Orseolia	2
Arthropoda	Rhodnius	2		Arthropoda	Opilio	2
Arthropoda	Plinthina	2		Arthropoda	Nullibrotheas	2
Arthropoda	Periplaneta	2		Arthropoda	Nothrus	2
Arthropoda	Paracyclopina	2		Arthropoda	Noteucinetus	2
Arthropoda	Panulirus	2		Arthropoda	Nomada	2
Arthropoda	Opistophthalmus	2		Arthropoda	Neogovea	2
Arthropoda	Nymphon	2		Arthropoda	Mycetophagus	2
Arthropoda	Neoleptoneta	2		Arthropoda	Mimotettix	2
Arthropoda	Neogovea	2		Arthropoda	Mesosemia	2
Arthropoda	Neocarus	2		Arthropoda	Mesobuthus	2
Arthropoda	Nebalia	2		Arthropoda	Melitaea	2
Arthropoda	Mesobuthus	2		Arthropoda	Macromia	2
Arthropoda	Melitaea	2		Arthropoda	Macrolophus	2
Arthropoda	Maconellicoccus	2		Arthropoda	Lithobius	2
Arthropoda	Lyctus	2		Arthropoda	Lepidocyrtus	2
Arthropoda	Lycosa	2		Arthropoda	Harmonia	2
Arthropoda	Leptopsalis	2		Arthropoda	Hanseniella	2
Arthropoda	Lepeophtheirus	2		Arthropoda	Hadrurus	2
Arthropoda	Halpe	2		Arthropoda	Dysdera	2
Arthropoda	Garypus	2		Arthropoda	Dorcatoma	2
Arthropoda	Frontiniella	2		Arthropoda	Doleromyrma	2
Arthropoda	Euspilotus	2		Arthropoda	Dermanyssus	2
Arthropoda	Euscorpius	2		Arthropoda	Culiseta	2
Arthropoda	Epilohmannia	2		Arthropoda	Cleotomiris	2
Arthropoda	Elaphropeza	2		Arthropoda	Chironomus	2
Arthropoda	Ectropis	2		Arthropoda	Caenis	2
Arthropoda	Ectoedemia	2		Arthropoda	Bothriurus	2
Arthropoda	Cryptocellus	2		Arthropoda	Betiscoides	2
Arthropoda	Cnaphalocrocis	2		Arthropoda	Artemia	2
Arthropoda	Baccalaureus	2		Arthropoda	Apozomus	2
Arthropoda	Artemia	2		Arthropoda	Acisoma	2
Arthropoda	Archegozetes	2		Apicomplexa	Neospora	2
Arthropoda	Aphelinus	2		Apicomplexa	Cryptosporidium	2
Annelida	Chaetozone	2		Annelida	Arenicola	2
Actinobacteria	Paeniglutamicibacter	2		Annelida	Alitta	2
Actinobacteria	Cryobacterium	2		Actinobacteria	Nocardioides	2
Actinobacteria	Corynebacterium	2		Actinobacteria	Mycolicibacterium	2
Zoopagomycota	Zancudomyces	1		Actinobacteria	Micromonospora	2
Zoopagomycota	Piptocephalis	1		Actinobacteria	Cutibacterium	2
Verrucomicrobia	NA	1		Actinobacteria	Curtobacterium	2
Streptophyta	Parasponia	1		Acidobacteria	Acidobacterium	2
Streptophyta	Olea	1		Xenacoelomorpha	Isodiametra	1
Streptophyta	Nelumbo	1		Streptophyta	Trema	1
Streptophyta	Musa	1		Streptophyta	Theobroma	1
Streptophyta	Eriobotrya	1		Streptophyta	Selaginella	1
Streptophyta	Eragrostis	1		Streptophyta	Phyllostachys	1
Streptophyta	Elaeis	1		Streptophyta	Phoenix	1
Streptophyta	Dichanthelium	1		Streptophyta	Momordica	1
Streptophyta	Conocephalum	1		Streptophyta	Lilium	1
Streptophyta	Coix	1		Streptophyta	Eucalyptus	1
Streptophyta	Capsella	1		Streptophyta	Ensete	1
Streptophyta	Avena	1		Streptophyta	Elaeis	1
Rotifera	Encentrum	1		Streptophyta	Cucurbita	1
Rotifera	Adineta	1		Streptophyta	Coix	1
Rhodophyta	Galdieria	1		Streptophyta	Actinidia	1
Proteobacteria	Sulfitobacter	1		Spirochaetes	NA	1
Proteobacteria	Sorangium	1		Rotifera	Philodina	1
Proteobacteria	Pantoea	1		Rotifera	Encentrum	1
Proteobacteria	Nitrospirillum	1		Rotifera	Adineta	1
Proteobacteria	Mesorhizobium	1		Rhodophyta	Gracilariopsis	1
Proteobacteria	Arcobacter	1		Proteobacteria	Stappia	1
Proteobacteria	Acidiphilium	1		Proteobacteria	Sphingobium	1
Proteobacteria	Achromobacter	1		Proteobacteria	Rhizobium	1
Porifera	Suberites	1		Proteobacteria	Pseudoalteromonas	1
Porifera	Halisarca	1		Proteobacteria	Phenylobacterium	1
Onychophora	Tasmanipatus	1		Proteobacteria	Paraburkholderia	1
Nemertea	Tetrastemma	1		Proteobacteria	Novosphingobium	1
Nematoda	Dirofilaria	1		Proteobacteria	Neorhizobium	1
Nematoda	Cyathostomum	1		Proteobacteria	Methylovirgula	1
Negarnaviricota	Lyssavirus	1		Proteobacteria	Mariprofundus	1
Negarnaviricota	Hapavirus	1		Proteobacteria	Haemophilus	1
NA	Sphaeroforma	1		Proteobacteria	Gluconobacter	1
NA	Peronospora	1		Proteobacteria	Desulfobulbus	1
NA	Errantivirus	1		Proteobacteria	Candidatus+Megaira	1
NA	Betaentomopoxvirus	1		Proteobacteria	Candidatus+Hepatobacter	1
NA	Albugo	1		Proteobacteria	Beijerinckia	1
NA	Acytostelium	1		Proteobacteria	Bartonella	1
Mucoromycota	Gigaspora	1		Proteobacteria	Azohydromonas	1
Mollusca	Solen	1		Proteobacteria	Allofrancisella	1
Mollusca	Schileykula	1		Proteobacteria	Afipia	1
Mollusca	Ruditapes	1		Proteobacteria	Achromobacter	1
Mollusca	Rimula	1		Porifera	Sycon	1
Mollusca	Phacoides	1		Platyhelminthes	NA	1
Mollusca	Palliolum	1		Nitrospirae	Candidatus+Magnetobacterium	1
Mollusca	Oxynoe	1		Nemertea	Hubrechtella	1
Mollusca	Otala	1		Nematoda	Chandlerella	1
Mollusca	Orcula	1		Negarnaviricota	Tupavirus	1
Mollusca	Mimachlamys	1		Negarnaviricota	Tibrovirus	1
Mollusca	Hyriopsis	1		Negarnaviricota	Sripuvirus	1
Mollusca	Helicopsis	1		Negarnaviricota	Perhabdovirus	1
Mollusca	Diplommatina	1		Negarnaviricota	Lyssavirus	1
Mollusca	Cochlicopa	1		Negarnaviricota	Ephemerovirus	1
Mollusca	Argopecten	1		NA	Tieghemostelium	1
Mollusca	Agardhiella	1		NA	Spumavirus	1
Microsporidia	Mitosporidium	1		NA	Plasmopara	1
Microsporidia	Hamiltosporidium	1		NA	Nannochloropsis	1
Firmicutes	Ruminiclostridium	1		NA	Lentivirus	1
Firmicutes	Cohnella	1		NA	Heterostelium	1
Echinodermata	Patiria	1		NA	Ectocarpus	1
Echinodermata	Asterias	1		NA	Creolimax	1
Cnidaria	Mastigias	1		NA	Cafeteria	1
Cnidaria	Caulastraea	1		NA	Bovispumavirus	1
Chytridiomycota	Chytriomyces	1		Mucoromycota	Jimgerdemannia	1
Chordata	Zalophus	1		Mucoromycota	Endogone	1
Chordata	Trichomycterus	1		Mucoromycota	Choanephora	1
Chordata	Terapon	1		Mollusca	Vallonia	1
Chordata	Scyliorhinus	1		Mollusca	Sunetta	1
Chordata	Pseudopodoces	1		Mollusca	Scintillona	1
Chordata	Polymixia	1		Mollusca	Schileykula	1
Chordata	Podiceps	1		Mollusca	Polinices	1
Chordata	Patagioenas	1		Mollusca	Pinctada	1
Chordata	Pareiodon	1		Mollusca	Phenacolepas	1
Chordata	Odontobutis	1		Mollusca	Oxynoe	1
Chordata	Odocoileus	1		Mollusca	Microcardium	1
Chordata	Ochotona	1		Mollusca	Lymnaea	1
Chordata	Eumetopias	1		Mollusca	Lomanotus	1
Chordata	Enhydra	1		Mollusca	Hyriopsis	1
Chordata	Engystomops	1		Mollusca	Hiatavolva	1
Chordata	Dasyatis	1		Mollusca	Gyraulus	1
Chordata	Craterocephalus	1		Mollusca	Ferrissia	1
Chordata	Coturnix	1		Mollusca	Euconulus	1
Chordata	Chaetobranchopsis	1		Mollusca	Diplommatina	1
Chordata	Cavia	1		Mollusca	Bellamya	1
Chordata	Cathartes	1		Mollusca	Armina	1
Chordata	Capra	1		Mollusca	Antarctophiline	1
Chordata	Balearica	1		Mollusca	Aeolidiella	1
Chordata	Apareiodon	1		Microsporidia	Pseudoloma	1
Chordata	Anguilla	1		Microsporidia	Ordospora	1
Chordata	Acanthisitta	1		Microsporidia	Nematocida	1
Chlorophyta	Volvox	1		Lentisphaerae	NA	1
Chlorophyta	Ostreococcus	1		Hemichordata	Rhabdopleura	1
Chlorophyta	Coccomyxa	1		Firmicutes	Anaerostipes	1
Chlorophyta	Chlorella	1		Euryarchaeota	Thermococcus	1
Chlorophyta	Bathycoccus	1		Echinodermata	Porania	1
Chaetognatha	Sagitta	1		Echinodermata	Ophiura	1
Candidatus+Lokiarchaeota	NA	1		Echinodermata	Ophiomyxa	1
Basidiomycota	Rhodotorula	1		Echinodermata	Echinometra	1
Basidiomycota	Phanerochaete	1		Echinodermata	Caenopedina	1
Basidiomycota	Mixia	1		Deinococcus	Thermus	1
Basidiomycota	Kwoniella	1		Cyanobacteria	Prochlorococcus	1
Basidiomycota	Kockovaella	1		Cyanobacteria	Nostoc	1
Basidiomycota	Galerina	1		Cyanobacteria	NA	1
Basidiomycota	Fistulina	1		Cyanobacteria	Microcoleus	1
Basidiomycota	Apiotrichum	1		Cyanobacteria	Geitlerinema	1
Bacteroidetes	Psychroflexus	1		Cyanobacteria	Anabaena	1
Ascomycota	Vanderwaltozyma	1		Crenarchaeota	Pyrobaculum	1
Ascomycota	Tortispora	1		Cnidaria	Podocoryna	1
Ascomycota	Taphrina	1		Ciliophora	Ichthyophthirius	1
Ascomycota	Sugiyamaella	1		Chytridiomycota	Rhizoclosmatium	1
Ascomycota	Scytalidium	1		Chytridiomycota	Chytriomyces	1
Ascomycota	Schizosaccharomyces	1		Chytridiomycota	Batrachochytrium	1
Ascomycota	Saccharomyces	1		Chordata	Trichomycterus	1
Ascomycota	Rachicladosporium	1		Chordata	Serinus	1
Ascomycota	Pyronema	1		Chordata	Scyliorhinus	1
Ascomycota	Phialemoniopsis	1		Chordata	Rousettus	1
Ascomycota	Periconia	1		Chordata	Petromyzon	1
Ascomycota	Paracoccidioides	1		Chordata	Pelophylax	1
Ascomycota	Monosporascus	1		Chordata	Patagioenas	1
Ascomycota	Lachancea	1		Chordata	Nomascus	1
Ascomycota	Golovinomyces	1		Chordata	Meristogenys	1
Ascomycota	Eremothecium	1		Chordata	Lobotes	1
Ascomycota	Cordyceps	1		Chordata	Leptobrachium	1
Ascomycota	Claviceps	1		Chordata	Halocynthia	1
Arthropoda	Zoniopoda	1		Chordata	Eurypyga	1
Arthropoda	Zelandoperla	1		Chordata	Eptatretus	1
Arthropoda	Udamocercia	1		Chordata	Enhydra	1
Arthropoda	Tinodes	1		Chordata	Deveximentum	1
Arthropoda	Temnostoma	1		Chordata	Desmodus	1
Arthropoda	Sungaya	1		Chordata	Cyanistes	1
Arthropoda	Steatoda	1		Chordata	Condylura	1
Arthropoda	Stagmomantis	1		Chordata	Chlamydotis	1
Arthropoda	Sphingonotus	1		Chordata	Centrobranchus	1
Arthropoda	Sphinctomyrmex	1		Chordata	Callorhinus	1
Arthropoda	Sphaeroma	1		Chordata	Arthroleptis	1
Arthropoda	Sicarius	1		Chordata	Apareiodon	1
Arthropoda	Shelfordina	1		Chlorophyta	Coccomyxa	1
Arthropoda	Scutigera	1		Chlorophyta	Caulerpa	1
Arthropoda	Sacculina	1		Chlorophyta	Acetabularia	1
Arthropoda	Riptortus	1		Chloroflexi	Roseiflexus	1
Arthropoda	Rhamphophasma	1		Chloroflexi	Candidatus+Viridilinea	1
Arthropoda	Pseudosinella	1		Chlamydiae	Neochlamydia	1
Arthropoda	Protrama	1		Chlamydiae	Candidatus+Rhabdochlamydia	1
Arthropoda	Pristoderus	1		Candidatus+Lokiarchaeota	NA	1
Arthropoda	Pristhesancus	1		Candidatus+Lloydbacteria	NA	1
Arthropoda	Platydesmus	1		Candidatus+Heimdallarchaeota	NA	1
Arthropoda	Phyllognathia	1		Candidatus+Aminicenantes	NA	1
Arthropoda	Philaccolilus	1		Candidatus+Aminicenantes	Candidatus+Saccharicenans	1
Arthropoda	Peringueyella	1		candidate division Zixibacteria	NA	1
Arthropoda	Perigonia	1		Basidiomycota	Sporidiobolus	1
Arthropoda	Paropsis	1		Basidiomycota	Serpula	1
Arthropoda	Parogovia	1		Basidiomycota	Serendipita	1
Arthropoda	Parastagmatoptera	1		Basidiomycota	Schizophyllum	1
Arthropoda	Panonychus	1		Basidiomycota	Pseudozyma	1
Arthropoda	Pallenopsis	1		Basidiomycota	Pleurotus	1
Arthropoda	Orthotomicus	1		Basidiomycota	Obba	1
Arthropoda	Orientus	1		Basidiomycota	Neolentinus	1
Arthropoda	Nephila	1		Basidiomycota	Laetiporus	1
Arthropoda	Mythimna	1		Basidiomycota	Jaapia	1
Arthropoda	Monotomopsis	1		Basidiomycota	Gelatoporia	1
Arthropoda	Moneilema	1		Basidiomycota	Dichomitus	1
Arthropoda	Metaplastes	1		Basidiomycota	Amanita	1
Arthropoda	Megafenestra	1		Basidiomycota	Acaromyces	1
Arthropoda	Mecistogaster	1		Bacteroidetes	Panacibacter	1
Arthropoda	Manohyphella	1		Bacteroidetes	Muricauda	1
Arthropoda	Macromia	1		Bacillariophyta	Fistulifera	1
Arthropoda	Lygus	1		Ascomycota	Zygosaccharomyces	1
Arthropoda	Liposcelis	1		Ascomycota	Trichoderma	1
Arthropoda	Liponeura	1		Ascomycota	Sphaerulina	1
Arthropoda	Leucauge	1		Ascomycota	Podospora	1
Arthropoda	Leptaulax	1		Ascomycota	Pichia	1
Arthropoda	Lepidocyrtus	1		Ascomycota	Phialophora	1
Arthropoda	Hydroperla	1		Ascomycota	Phialemoniopsis	1
Arthropoda	Hockeria	1		Ascomycota	Pezoloma	1
Arthropoda	Hadruroides	1		Ascomycota	Periconia	1
Arthropoda	Gryllus	1		Ascomycota	Penicilliopsis	1
Arthropoda	Glomeris	1		Ascomycota	Paraphaeosphaeria	1
Arthropoda	Euphausia	1		Ascomycota	Ogataea	1
Arthropoda	Euchroma	1		Ascomycota	Neofusicoccum	1
Arthropoda	Erinnyis	1		Ascomycota	Monosporascus	1
Arthropoda	Enallagma	1		Ascomycota	Eutypa	1
Arthropoda	Derodontus	1		Ascomycota	Eremothecium	1
Arthropoda	Delias	1		Ascomycota	Elaphomyces	1
Arthropoda	Cuapetes	1		Ascomycota	Coniosporium	1
Arthropoda	Crinitella	1		Ascomycota	Coccidioides	1
Arthropoda	Coelotes	1		Ascomycota	Cercospora	1
Arthropoda	Coeliccia	1		Ascomycota	Brettanomyces	1
Arthropoda	Chromatomyia	1		Ascomycota	Aureobasidium	1
Arthropoda	Chilades	1		Ascomycota	Ascobolus	1
Arthropoda	Chiasmia	1		Arthropoda	Ummeliata	1
Arthropoda	Calospasta	1		Arthropoda	Tetraponera	1
Arthropoda	Callobius	1		Arthropoda	Tetragnatha	1
Arthropoda	Caenis	1		Arthropoda	Teleopsis	1
Arthropoda	Brasidas	1		Arthropoda	Tanystylum	1
Arthropoda	Biphyllus	1		Arthropoda	Stylocellus	1
Arthropoda	Bdellorhynchus	1		Arthropoda	Statilia	1
Arthropoda	Austinixa	1		Arthropoda	Solenysa	1
Arthropoda	Atrax	1		Arthropoda	Simocephalus	1
Arthropoda	Atanygnathus	1		Arthropoda	Sensitibilla	1
Arthropoda	Aretaon	1		Arthropoda	Selenops	1
Arthropoda	Apozomus	1		Arthropoda	Sanogasta	1
Arthropoda	Aphonopelma	1		Arthropoda	Sacculina	1
Arthropoda	Aoteapsyche	1		Arthropoda	Rhynchosciara	1
Arthropoda	Anyphops	1		Arthropoda	Rhamphophasma	1
Arthropoda	Anurida	1		Arthropoda	Pseudosinella	1
Arthropoda	Alpioniscus	1		Arthropoda	Podagrica	1
Arthropoda	Afroagraecia	1		Arthropoda	Pipunculus	1
Arthropoda	Aceraius	1		Arthropoda	Phyllonorycter	1
Arthropoda	Abacion	1		Arthropoda	Philaccolilus	1
Annelida	Sabellastarte	1		Arthropoda	Phenacoccus	1
Annelida	Ophryotrocha	1		Arthropoda	Pheidole	1
Annelida	Ctenodrilus	1		Arthropoda	Parapseudes	1
Actinobacteria	Mycobacteroides	1		Arthropoda	Paralamyctes	1
				Arthropoda	Paracyclopina	1
				Arthropoda	Pacifastacus	1
				Arthropoda	Nymphon	1
				Arthropoda	Nicoletia	1
				Arthropoda	Neoseiulus	1
				Arthropoda	Narceus	1
				Arthropoda	Myrmica	1
				Arthropoda	Munidopsis	1
				Arthropoda	Microphotina	1
				Arthropoda	Mesocletodes	1
				Arthropoda	Lygus	1
				Arthropoda	Lybaeba	1
				Arthropoda	Laophontodes	1
				Arthropoda	Iurus	1
				Arthropoda	Hyalomma	1
				Arthropoda	Hippodamia	1
				Arthropoda	Heteropterus	1
				Arthropoda	Heterocerus	1
				Arthropoda	Glomeris	1
				Arthropoda	Glabellula	1
				Arthropoda	Euphausia	1
				Arthropoda	Euhybus	1
				Arthropoda	Euglossa	1
				Arthropoda	Euderia	1
				Arthropoda	Euchomenella	1
				Arthropoda	Eriocheir	1
				Arthropoda	Ericerus	1
				Arthropoda	Erebia	1
				Arthropoda	Epiphysa	1
				Arthropoda	Epimeria	1
				Arthropoda	Cyrtocarenum	1
				Arthropoda	Cyclopicina	1
				Arthropoda	Cuapetes	1
				Arthropoda	Cordulia	1
				Arthropoda	Coelotes	1
				Arthropoda	Cnaphalocrocis	1
				Arthropoda	Chrysoperla	1
				Arthropoda	Chromatomyia	1
				Arthropoda	Chiasmia	1
				Arthropoda	Cecidostiba	1
				Arthropoda	Bocula	1
				Arthropoda	Athetis	1
				Arthropoda	Astacilla	1
				Arthropoda	Argyroneta	1
				Arthropoda	Araschnia	1
				Arthropoda	Aoraki	1
				Arthropoda	Anthonomus	1
				Arthropoda	Anasigerpes	1
				Arthropoda	Anaphothrips	1
				Arthropoda	Alpioniscus	1
				Arthropoda	Adelphocoris	1
				Apicomplexa	Sarcocystis	1
				Annelida	Sipunculus	1
				Annelida	Sabellastarte	1
				Annelida	Psammodrilus	1
				Annelida	Nereimyra	1
				Annelida	Mesenchytraeus	1
				Annelida	Lumbricus	1
				Annelida	Dysponetus	1
				Actinobacteria	Propioniferax	1
				Actinobacteria	Brachybacterium	1
