# Supplementary material for: Comparative hologenomics of two Ixodes scapularis tick populations in New Jersey
Source: PeerJ. 2021 Nov 9;9:e12313. doi: 10.7717/peerj.12313 (PMC8588856; doi:10.7717/peerj.12313)
Supplement: Supplemental Information 5 — Homology searches performed using BLASTn against the NCBI ’nt’ nucleotide database with NWSE (left) and PVIL (right) merged amplicon reads (raw BLAST output in Table S3). The corresponding top-hit accession numbers were annotated with assigned NCBI taxonomy using taxonomizr and summarized here. [file peerj-09-12313-s005.xlsx]

## Sheet: Sheet1
16S amplicons (merged only)
NWSE	Amplicons	% of Total		PVIL	Amplicons	% of Toal
Proteobacteria_Rickettsia	181784	0.964515		Proteobacteria_Rickettsia	216834	0.940087
Spirochaetes_Borreliella	6157	0.032668		Spirochaetes_Borreliella	10309	0.0446948
Uncultured bacterium	317	0.00168195		Proteobacteria_Anaplasma	1668	0.00723164
Proteobacteria_Wolbachia	89	0.000472219		Proteobacteria_Wolbachia	1626	0.00704955
Proteobacteria_Bradyrhizobium	32	< .05%		Proteobacteria_Anaplasmataceae_NA	92	<.05%
Candidatus Microgenomates_NA	26	< .05%		Uncultured bacterium	57	<.05%
Uncultured Archaea	21	< .05%		Proteobacteria_Bradyrhizobium	14	<.05%
Proteobacteria_Tepidimonas	17	< .05%		Proteobacteria_Escherichia	9	<.05%
Proteobacteria_Anaplasmataceae_NA	12	< .05%		Proteobacteria_Tepidimonas	9	<.05%
Bacteroidetes_Gillisia	6	< .05%		Firmicutes_Jeotgalicoccus	7	<.05%
Actinobacteria_Brachybacterium	6	< .05%		Proteobacteria_Pseudomonas	6	<.05%
Proteobacteria_Pseudomonas	3	< .05%		Actinobacteria_Brevibacterium	6	<.05%
Proteobacteria_Roseococcus	1	< .05%		Actinobacteria_Ornithinimicrobium	5	<.05%
Proteobacteria_NA	1	< .05%		Firmicutes_Aliicoccus	4	<.05%
Total	188472			Proteobacteria_Candidatus Trichorickettsia	3	<.05%
				Deinococcus-Meiothermus	3	<.05%
				Proteobacteria_NA	1	<.05%
				Total	230653

## Sheet: NEW PVIL
214894	Bacteria_Proteobacteria_Alphaproteobacteria_Rickettsiales_Rickettsiaceae_Rickettsia_Rickettsia_monacensis
10252	Bacteria_Spirochaetes_Spirochaetia_Spirochaetales_Borreliaceae_Borreliella_Borreliella_burgdorferi
1667	Bacteria_Proteobacteria_Alphaproteobacteria_Rickettsiales_Anaplasmataceae_Anaplasma_Anaplasma_phagocytophilum
1569	Bacteria_Proteobacteria_Alphaproteobacteria_Rickettsiales_Anaplasmataceae_Wolbachia_Wolbachia_sp.
611	Bacteria_Proteobacteria_Alphaproteobacteria_Rickettsiales_Rickettsiaceae_Rickettsia_Candidatus_Rickettsia_longicornii
560	Bacteria_Proteobacteria_Alphaproteobacteria_Rickettsiales_Rickettsiaceae_Rickettsia_Candidatus_Rickettsia_tarasevichiae
339	Bacteria_Proteobacteria_Alphaproteobacteria_Rickettsiales_Rickettsiaceae_Rickettsia_Rickettsia_sp._IRS_4
92	Bacteria_Proteobacteria_Alphaproteobacteria_Rickettsiales_Anaplasmataceae_NA_uncultured_Anaplasmataceae_bacterium
78	Bacteria_Proteobacteria_Alphaproteobacteria_Rickettsiales_Rickettsiaceae_Rickettsia_Rickettsia_endosymbiont_of_Amblyomma_coelebs
71	Bacteria_Proteobacteria_Alphaproteobacteria_Rickettsiales_Rickettsiaceae_Rickettsia_uncultured_Rickettsia_sp.
57	Bacteria_NA_NA_NA_NA_NA_uncultured_bacterium
45	Bacteria_Proteobacteria_Alphaproteobacteria_Rickettsiales_Anaplasmataceae_Wolbachia_Wolbachia_endosymbiont_of_Cimex_lectularius
43	Bacteria_Proteobacteria_Alphaproteobacteria_Rickettsiales_Rickettsiaceae_Rickettsia_Rickettsia_sibirica
32	Bacteria_Proteobacteria_Alphaproteobacteria_Rickettsiales_Rickettsiaceae_Rickettsia_Rickettsia_endosymbiont_of_Carios_kelleyi
31	Bacteria_Proteobacteria_Alphaproteobacteria_Rickettsiales_Rickettsiaceae_Rickettsia_Rickettsia_endosymbiont_of_Aulogymnus_balani/skianeuros
23	Bacteria_Proteobacteria_Alphaproteobacteria_Rickettsiales_Rickettsiaceae_Rickettsia_Rickettsia_japonica
20	Bacteria_Spirochaetes_Spirochaetia_Spirochaetales_Borreliaceae_Borreliella_Borreliella_garinii
19	Bacteria_Proteobacteria_Alphaproteobacteria_Rickettsiales_Rickettsiaceae_Rickettsia_Rickettsia_fournieri
18	Bacteria_Spirochaetes_Spirochaetia_Spirochaetales_Borreliaceae_Borreliella_Borreliella_carolinensis
15	Bacteria_Proteobacteria_Alphaproteobacteria_Rickettsiales_Rickettsiaceae_Rickettsia_Rickettsia_honei
15	Bacteria_Proteobacteria_Alphaproteobacteria_Rickettsiales_Rickettsiaceae_Rickettsia_Rickettsia_endosymbiont_of_Rhyzobius_chrysomeloides
14	Bacteria_Proteobacteria_Alphaproteobacteria_Rhizobiales_Bradyrhizobiaceae_Bradyrhizobium_Bradyrhizobium_valentinum
13	Bacteria_Spirochaetes_Spirochaetia_Spirochaetales_Borreliaceae_Borreliella_Borrelia_sp._SCGT-10
12	Bacteria_Proteobacteria_Alphaproteobacteria_Rickettsiales_Rickettsiaceae_Rickettsia_Rickettsia_endosymbiont_of_Bruchidius_varius
11	Bacteria_Proteobacteria_Alphaproteobacteria_Rickettsiales_Rickettsiaceae_Rickettsia_Rickettsia_parkeri
9	Bacteria_Proteobacteria_Gammaproteobacteria_Enterobacterales_Enterobacteriaceae_Escherichia_Escherichia_coli
9	Bacteria_Proteobacteria_Betaproteobacteria_Burkholderiales_NA_Tepidimonas_Tepidimonas_sp.
9	Bacteria_Proteobacteria_Alphaproteobacteria_Rickettsiales_Rickettsiaceae_Rickettsia_Rickettsia_endosymbiont_of_Pnigalio_sp.
7	Bacteria_Proteobacteria_Alphaproteobacteria_Rickettsiales_Rickettsiaceae_Rickettsia_Rickettsia_sp._Nfor
7	Bacteria_Proteobacteria_Alphaproteobacteria_Rickettsiales_Rickettsiaceae_Rickettsia_Rickettsia_endosymbiont_of_Dermacentor_hunteri
7	Bacteria_Proteobacteria_Alphaproteobacteria_Rickettsiales_Rickettsiaceae_Rickettsia_Rickettsia_endosymbiont_of_Bemisia_tabaci
6	Bacteria_Proteobacteria_Alphaproteobacteria_Rickettsiales_Anaplasmataceae_Wolbachia_uncultured_Wolbachia_sp.
6	Bacteria_Firmicutes_Bacilli_Bacillales_Staphylococcaceae_Jeotgalicoccus_Jeotgalicoccus_sp.
6	Bacteria_Actinobacteria_Actinobacteria_Micrococcales_Brevibacteriaceae_Brevibacterium_Brevibacterium_sp._CS2
5	Bacteria_Proteobacteria_Gammaproteobacteria_Pseudomonadales_Pseudomonadaceae_Pseudomonas_Pseudomonas_sp.
5	Bacteria_Proteobacteria_Alphaproteobacteria_Rickettsiales_Rickettsiaceae_Rickettsia_Rickettsia_felis
5	Bacteria_Actinobacteria_Actinobacteria_Micrococcales_Intrasporangiaceae_Ornithinimicrobium_Ornithinimicrobium_sp.
4	Bacteria_Proteobacteria_Alphaproteobacteria_Rickettsiales_Rickettsiaceae_Rickettsia_Rickettsia_sp._60a
4	Bacteria_Proteobacteria_Alphaproteobacteria_Rickettsiales_Rickettsiaceae_Rickettsia_Rickettsia_asembonensis
4	Bacteria_Proteobacteria_Alphaproteobacteria_Rickettsiales_Rickettsiaceae_Rickettsia_Rickettsia_akari
4	Bacteria_Firmicutes_Bacilli_Bacillales_Staphylococcaceae_Aliicoccus_uncultured_Aliicoccus_sp.
3	Bacteria_Proteobacteria_Alphaproteobacteria_Rickettsiales_Rickettsiaceae_Rickettsia_Rickettsia_tamurae
3	Bacteria_Proteobacteria_Alphaproteobacteria_Rickettsiales_Rickettsiaceae_Rickettsia_Rickettsia_sp.
3	Bacteria_Proteobacteria_Alphaproteobacteria_Rickettsiales_Rickettsiaceae_Rickettsia_Rickettsia_rickettsii
3	Bacteria_Proteobacteria_Alphaproteobacteria_Rickettsiales_Rickettsiaceae_Rickettsia_Rickettsia_endosymbiont_of_Peyerimhoffina_gracilis
3	Bacteria_Proteobacteria_Alphaproteobacteria_Rickettsiales_Rickettsiaceae_Rickettsia_Rickettsia_endosymbiont_of_Nosopsyllus_laeviceps_laeviceps
3	Bacteria_Proteobacteria_Alphaproteobacteria_Rickettsiales_Rickettsiaceae_Candidatus_Trichorickettsia_Candidatus_Trichorickettsia_mobilis
3	Bacteria_Proteobacteria_Alphaproteobacteria_Rickettsiales_Anaplasmataceae_Wolbachia_Wolbachia_endosymbiont_of_Odontotermes_horni
3	Bacteria_Deinococcus-Thermus_Deinococci_Thermales_Thermaceae_Meiothermus_Meiothermus_sp.
2	Bacteria_Spirochaetes_Spirochaetia_Spirochaetales_Borreliaceae_Borreliella_Borrelia_sp._Ir-4812
2	Bacteria_Proteobacteria_Alphaproteobacteria_Rickettsiales_Rickettsiaceae_Rickettsia_Rickettsia_endosymbiont_of_Trialeurodes_vaporariorum
2	Bacteria_Proteobacteria_Alphaproteobacteria_Rickettsiales_Rickettsiaceae_Rickettsia_Rickettsia_endosymbiont_of_Scymnus_frontalis
2	Bacteria_Proteobacteria_Alphaproteobacteria_Rickettsiales_Rickettsiaceae_Rickettsia_Rickettsia_endosymbiont_of_Rhpipicephalus_turanicus
2	Bacteria_Proteobacteria_Alphaproteobacteria_Rickettsiales_Anaplasmataceae_Wolbachia_Wolbachia_endosymbiont_of_Heterotermes_sp.
1	Bacteria_Spirochaetes_Spirochaetia_Spirochaetales_Borreliaceae_Borreliella_uncultured_Borreliella_sp.
1	Bacteria_Spirochaetes_Spirochaetia_Spirochaetales_Borreliaceae_Borreliella_Borreliella_bissettii
1	Bacteria_Spirochaetes_Spirochaetia_Spirochaetales_Borreliaceae_Borreliella_Borrelia_sp._CA690
1	Bacteria_Spirochaetes_Spirochaetia_Spirochaetales_Borreliaceae_Borrelia_Borrelia_sp._BR_2007
1	Bacteria_Proteobacteria_Gammaproteobacteria_Pseudomonadales_Pseudomonadaceae_Pseudomonas_uncultured_Pseudomonas_sp.
1	Bacteria_Proteobacteria_Gammaproteobacteria_NA_NA_NA_uncultured_Gammaproteobacteria_bacterium
1	Bacteria_Proteobacteria_Alphaproteobacteria_Rickettsiales_Rickettsiaceae_Rickettsia_Rickettsia_sp._TMOM-2009
1	Bacteria_Proteobacteria_Alphaproteobacteria_Rickettsiales_Rickettsiaceae_Rickettsia_Rickettsia_montanensis
1	Bacteria_Proteobacteria_Alphaproteobacteria_Rickettsiales_Rickettsiaceae_Rickettsia_Rickettsia_marmionii
1	Bacteria_Proteobacteria_Alphaproteobacteria_Rickettsiales_Rickettsiaceae_Rickettsia_Rickettsia_hoogstraalii
1	Bacteria_Proteobacteria_Alphaproteobacteria_Rickettsiales_Rickettsiaceae_Rickettsia_Rickettsia_endosymbiont_of_Rhpipicephalus_sanguineus
1	Bacteria_Proteobacteria_Alphaproteobacteria_Rickettsiales_Rickettsiaceae_Rickettsia_Rickettsia_endosymbiont_of_Reduviidae_species
1	Bacteria_Proteobacteria_Alphaproteobacteria_Rickettsiales_Rickettsiaceae_Rickettsia_Rickettsia_endosymbiont_of_Nysius_sp._2
1	Bacteria_Proteobacteria_Alphaproteobacteria_Rickettsiales_Rickettsiaceae_Rickettsia_Rickettsia_endosymbiont_of_Nesidiocoris_tenuis
1	Bacteria_Proteobacteria_Alphaproteobacteria_Rickettsiales_Rickettsiaceae_Rickettsia_Rickettsia_endosymbiont_of_Halictus_tumulorum
1	Bacteria_Proteobacteria_Alphaproteobacteria_Rickettsiales_Rickettsiaceae_Rickettsia_Rickettsia_endosymbiont_of_Coccidula_rufa
1	Bacteria_Proteobacteria_Alphaproteobacteria_Rickettsiales_Rickettsiaceae_Rickettsia_Rickettsia_endosymbiont_of_Chrysoperla_carnea
1	Bacteria_Proteobacteria_Alphaproteobacteria_Rickettsiales_Rickettsiaceae_Rickettsia_Rickettsia_endosymbiont_of_Amblyomma_naponense
1	Bacteria_Proteobacteria_Alphaproteobacteria_Rickettsiales_Anaplasmataceae_Wolbachia_Wolbachia_endosymbiont_of_Atemnus_politus
1	Bacteria_Proteobacteria_Alphaproteobacteria_Rickettsiales_Anaplasmataceae_Anaplasma_uncultured_Anaplasma_sp.
1	Bacteria_Firmicutes_Bacilli_Bacillales_Staphylococcaceae_Jeotgalicoccus_uncultured_Jeotgalicoccus_sp.

## Sheet: PVIL
216834	Bacteria_Proteobacteria_Alphaproteobacteria_Rickettsiales_Rickettsiaceae_Rickettsia
10308	Bacteria_Spirochaetes_Spirochaetia_Spirochaetales_Borreliaceae_Borreliella
1668	Bacteria_Proteobacteria_Alphaproteobacteria_Rickettsiales_Anaplasmataceae_Anaplasma
1626	Bacteria_Proteobacteria_Alphaproteobacteria_Rickettsiales_Anaplasmataceae_Wolbachia
92	Bacteria_Proteobacteria_Alphaproteobacteria_Rickettsiales_Anaplasmataceae_NA
57	Bacteria_NA_NA_NA_NA_NA
14	Bacteria_Proteobacteria_Alphaproteobacteria_Rhizobiales_Bradyrhizobiaceae_Bradyrhizobium
9	Bacteria_Proteobacteria_Gammaproteobacteria_Enterobacterales_Enterobacteriaceae_Escherichia
9	Bacteria_Proteobacteria_Betaproteobacteria_Burkholderiales_NA_Tepidimonas
7	Bacteria_Firmicutes_Bacilli_Bacillales_Staphylococcaceae_Jeotgalicoccus
6	Bacteria_Proteobacteria_Gammaproteobacteria_Pseudomonadales_Pseudomonadaceae_Pseudomonas
6	Bacteria_Actinobacteria_Actinobacteria_Micrococcales_Brevibacteriaceae_Brevibacterium
5	Bacteria_Actinobacteria_Actinobacteria_Micrococcales_Intrasporangiaceae_Ornithinimicrobium
4	Bacteria_Firmicutes_Bacilli_Bacillales_Staphylococcaceae_Aliicoccus
3	Bacteria_Proteobacteria_Alphaproteobacteria_Rickettsiales_Rickettsiaceae_Candidatus Trichorickettsia
3	Bacteria_Deinococcus-Thermus_Deinococci_Thermales_Thermaceae_Meiothermus
1	Bacteria_Spirochaetes_Spirochaetia_Spirochaetales_Borreliaceae_Borrelia
1	Bacteria_Proteobacteria_Gammaproteobacteria_NA_NA_NA
230653

## Sheet: NEW PVIL REDUCED
Proteobacteria_Rickettsia	216834
Spirochaetes_Borreliella	10309
Proteobacteria_Anaplasma	1668
Proteobacteria_Wolbachia	1626
Proteobacteria_Anaplasmataceae_NA	92
Bacteria_NA_NA_NA_NA_NA	57
Proteobacteria_Bradyrhizobium	14
Proteobacteria_Escherichia	9
Proteobacteria_Tepidimonas	9
Firmicutes_Jeotgalicoccus	7
Proteobacteria_Pseudomonas	6
Actinobacteria_Brevibacterium	6
Actinobacteria_Ornithinimicrobium	5
Firmicutes_Aliicoccus	4
Proteobacteria_Candidatus Trichorickettsia	3
Deinococcus-Meiothermus	3
Proteobacteria_NA	1
Total	230653	230437

## Sheet: NEW NWSE
179997	Bacteria_Proteobacteria_Alphaproteobacteria_Rickettsiales_Rickettsiaceae_Rickettsia_Rickettsia_monacensis
6124	Bacteria_Spirochaetes_Spirochaetia_Spirochaetales_Borreliaceae_Borreliella_Borreliella_burgdorferi
527	Bacteria_Proteobacteria_Alphaproteobacteria_Rickettsiales_Rickettsiaceae_Rickettsia_Candidatus_Rickettsia_longicornii
467	Bacteria_Proteobacteria_Alphaproteobacteria_Rickettsiales_Rickettsiaceae_Rickettsia_Rickettsia_sp._IRS_4
437	Bacteria_Proteobacteria_Alphaproteobacteria_Rickettsiales_Rickettsiaceae_Rickettsia_Candidatus_Rickettsia_tarasevichiae
313	Bacteria_NA_NA_NA_NA_NA_uncultured_bacterium
84	Bacteria_Proteobacteria_Alphaproteobacteria_Rickettsiales_Anaplasmataceae_Wolbachia_Wolbachia_sp.
57	Bacteria_Proteobacteria_Alphaproteobacteria_Rickettsiales_Rickettsiaceae_Rickettsia_Rickettsia_sibirica
49	Bacteria_Proteobacteria_Alphaproteobacteria_Rickettsiales_Rickettsiaceae_Rickettsia_Rickettsia_endosymbiont_of_Amblyomma_coelebs
38	Eukaryota_Rhodophyta_Bangiophyceae_Cyanidiales_Cyanidiaceae_Cyanidioschyzon_Cyanidioschyzon_merolae
38	Bacteria_Proteobacteria_Alphaproteobacteria_Rickettsiales_Rickettsiaceae_Rickettsia_uncultured_Rickettsia_sp.
31	Bacteria_Proteobacteria_Alphaproteobacteria_Rickettsiales_Rickettsiaceae_Rickettsia_Rickettsia_endosymbiont_of_Aulogymnus_balani/skianeuros
29	Bacteria_Proteobacteria_Alphaproteobacteria_Rickettsiales_Rickettsiaceae_Rickettsia_Rickettsia_fournieri
29	Bacteria_Bacteroidetes_Saprospiria_Saprospirales_Saprospiraceae_NA_uncultured_Saprospiraceae_bacterium
26	Bacteria_Candidatus_Microgenomates_NA_NA_NA_NA_uncultured_eubacterium_WCHB1-56
25	Bacteria_Proteobacteria_Alphaproteobacteria_Rhizobiales_Bradyrhizobiaceae_Bradyrhizobium_Bradyrhizobium_valentinum
23	Bacteria_Proteobacteria_Alphaproteobacteria_Rickettsiales_Rickettsiaceae_Rickettsia_Rickettsia_japonica
21	Archaea_NA_NA_NA_NA_NA_uncultured_archaeon
20	Bacteria_Proteobacteria_Alphaproteobacteria_Rickettsiales_Rickettsiaceae_Rickettsia_Rickettsia_endosymbiont_of_Carios_kelleyi
17	Bacteria_Proteobacteria_Betaproteobacteria_Burkholderiales_NA_Tepidimonas_Tepidimonas_sp.
17	Bacteria_Actinobacteria_Actinobacteria_NA_NA_NA_uncultured_actinobacterium
14	Bacteria_Proteobacteria_Alphaproteobacteria_Rickettsiales_Rickettsiaceae_Rickettsia_Rickettsia_endosymbiont_of_Bruchidius_varius
13	Bacteria_Proteobacteria_Alphaproteobacteria_Rickettsiales_Rickettsiaceae_Rickettsia_Rickettsia_honei
12	Eukaryota_Streptophyta_Magnoliopsida_Fagales_Betulaceae_Carpinus_Carpinus_viminea
12	Bacteria_Proteobacteria_Alphaproteobacteria_Rickettsiales_Anaplasmataceae_NA_uncultured_Anaplasmataceae_bacterium
12	Bacteria_Cyanobacteria_NA_NA_NA_NA_uncultured_cyanobacterium
11	Bacteria_Firmicutes_Bacilli_Lactobacillales_Streptococcaceae_Streptococcus_Streptococcus_sp._C206
10	Bacteria_Proteobacteria_Gammaproteobacteria_Enterobacterales_Enterobacteriaceae_Escherichia_Escherichia_coli
9	Bacteria_Spirochaetes_Spirochaetia_Spirochaetales_Borreliaceae_Borreliella_Borreliella_garinii
9	Bacteria_Proteobacteria_Alphaproteobacteria_Rickettsiales_Rickettsiaceae_Rickettsia_Rickettsia_asembonensis
9	Bacteria_Firmicutes_Bacilli_Bacillales_Staphylococcaceae_Staphylococcus_Staphylococcus_epidermidis
8	Bacteria_Spirochaetes_Spirochaetia_Spirochaetales_Borreliaceae_Borreliella_Borreliella_carolinensis
8	Bacteria_Firmicutes_Bacilli_Bacillales_NA_Exiguobacterium_NA
7	Eukaryota_Streptophyta_Magnoliopsida_Malpighiales_Salicaceae_Populus_Populus_davidiana
7	Bacteria_Proteobacteria_Alphaproteobacteria_Rickettsiales_Rickettsiaceae_Rickettsia_Rickettsia_endosymbiont_of_Rhyzobius_chrysomeloides
7	Bacteria_Proteobacteria_Alphaproteobacteria_Rickettsiales_Rickettsiaceae_Rickettsia_Rickettsia_endosymbiont_of_Pnigalio_sp.
7	Bacteria_Proteobacteria_Alphaproteobacteria_Rhodobacterales_Rhodobacteraceae_Rhodobacter_uncultured_Rhodobacter_sp.
6	Bacteria_Spirochaetes_Spirochaetia_Spirochaetales_Borreliaceae_Borreliella_Borrelia_sp._SCGT-10
6	Bacteria_Proteobacteria_Alphaproteobacteria_Rickettsiales_Rickettsiaceae_Rickettsia_Rickettsia_felis
6	Bacteria_Proteobacteria_Alphaproteobacteria_Rickettsiales_Rickettsiaceae_Rickettsia_Rickettsia_endosymbiont_of_Rhpipicephalus_turanicus
6	Bacteria_Proteobacteria_Alphaproteobacteria_Rickettsiales_Rickettsiaceae_Rickettsia_Rickettsia_endosymbiont_of_Dermacentor_hunteri
6	Bacteria_Bacteroidetes_Flavobacteriia_Flavobacteriales_Flavobacteriaceae_Gillisia_Gillisia_sp._NP8
6	Bacteria_Actinobacteria_Actinobacteria_Micrococcales_Dermabacteraceae_Brachybacterium_Brachybacterium_conglomeratum
5	NA_NA_NA_NA_NA_NA_uncultured_prokaryote
5	Bacteria_Proteobacteria_Alphaproteobacteria_Rickettsiales_Rickettsiaceae_Rickettsia_Rickettsia_rickettsii
5	Bacteria_Proteobacteria_Alphaproteobacteria_Rickettsiales_Rickettsiaceae_Rickettsia_Rickettsia_parkeri
4	Bacteria_Proteobacteria_Alphaproteobacteria_Rickettsiales_Rickettsiaceae_Rickettsia_Rickettsia_endosymbiont_of_Trialeurodes_vaporariorum
4	Bacteria_Proteobacteria_Alphaproteobacteria_Rickettsiales_Anaplasmataceae_Wolbachia_Wolbachia_endosymbiont_of_Cimex_lectularius
4	Bacteria_NA_NA_NA_NA_NA_bacterium
4	Bacteria_Firmicutes_Bacilli_Bacillales_Staphylococcaceae_Staphylococcus_Staphylococcus_warneri
3	Bacteria_Spirochaetes_Spirochaetia_Spirochaetales_Borreliaceae_Borreliella_Borreliella_bissettii
3	Bacteria_Proteobacteria_Gammaproteobacteria_Pseudomonadales_Pseudomonadaceae_Pseudomonas_Pseudomonas_sp.
3	Bacteria_Proteobacteria_Alphaproteobacteria_Rickettsiales_Rickettsiaceae_Rickettsia_Rickettsia_sp._Nfor
3	Bacteria_Proteobacteria_Alphaproteobacteria_Rickettsiales_Rickettsiaceae_Rickettsia_Rickettsia_endosymbiont_of_Bembidion_articulatum
3	Bacteria_Proteobacteria_Alphaproteobacteria_Rickettsiales_Rickettsiaceae_Rickettsia_Rickettsia_akari
3	Bacteria_Proteobacteria_Alphaproteobacteria_Rhizobiales_Bradyrhizobiaceae_Bradyrhizobium_uncultured_Bradyrhizobium_sp.
3	Bacteria_Firmicutes_Bacilli_Lactobacillales_Streptococcaceae_Streptococcus_Streptococcus_rubneri
2	Bacteria_Spirochaetes_Spirochaetia_Spirochaetales_Borreliaceae_Borreliella_Borrelia_sp._Z41493
2	Bacteria_Spirochaetes_Spirochaetia_Spirochaetales_Borreliaceae_Borreliella_Borrelia_sp._MI-8
2	Bacteria_Proteobacteria_Alphaproteobacteria_Rickettsiales_Rickettsiaceae_Rickettsia_Rickettsia_tamurae
2	Bacteria_Proteobacteria_Alphaproteobacteria_Rickettsiales_Rickettsiaceae_Rickettsia_Rickettsia_endosymbiont_of_Bemisia_tabaci
2	Bacteria_Proteobacteria_Alphaproteobacteria_Rickettsiales_Rickettsiaceae_Rickettsia_Rickettsia_australis
2	Bacteria_Proteobacteria_Alphaproteobacteria_Rhizobiales_Bradyrhizobiaceae_Bradyrhizobium_Bradyrhizobium_sp._Leb-16
1	Eukaryota_Streptophyta_Magnoliopsida_Rosales_Cannabaceae_Cannabis_Cannabis_sativa
1	Eukaryota_NA_NA_NA_NA_NA_uncultured_eukaryote
1	Bacteria_Spirochaetes_Spirochaetia_Spirochaetales_Borreliaceae_Borreliella_Borreliella_americana
1	Bacteria_Spirochaetes_Spirochaetia_Spirochaetales_Borreliaceae_Borreliella_Borrelia_sp._MI-6
1	Bacteria_Spirochaetes_Spirochaetia_Spirochaetales_Borreliaceae_Borreliella_Borrelia_sp._CA690
1	Bacteria_Proteobacteria_Alphaproteobacteria_Rickettsiales_Rickettsiaceae_Rickettsia_Rickettsia_sp._TMOM-2009
1	Bacteria_Proteobacteria_Alphaproteobacteria_Rickettsiales_Rickettsiaceae_Rickettsia_Rickettsia_sp._ALSK
1	Bacteria_Proteobacteria_Alphaproteobacteria_Rickettsiales_Rickettsiaceae_Rickettsia_Rickettsia_sp.
1	Bacteria_Proteobacteria_Alphaproteobacteria_Rickettsiales_Rickettsiaceae_Rickettsia_Rickettsia_marmionii
1	Bacteria_Proteobacteria_Alphaproteobacteria_Rickettsiales_Rickettsiaceae_Rickettsia_Rickettsia_endosymbiont_of_Scymnus_frontalis
1	Bacteria_Proteobacteria_Alphaproteobacteria_Rickettsiales_Rickettsiaceae_Rickettsia_Rickettsia_endosymbiont_of_Peyerimhoffina_gracilis
1	Bacteria_Proteobacteria_Alphaproteobacteria_Rickettsiales_Rickettsiaceae_Rickettsia_Rickettsia_endosymbiont_of_Onychiurus_sinensis
1	Bacteria_Proteobacteria_Alphaproteobacteria_Rickettsiales_Rickettsiaceae_Rickettsia_Rickettsia_endosymbiont_of_Nysius_sp._2
1	Bacteria_Proteobacteria_Alphaproteobacteria_Rickettsiales_Rickettsiaceae_Rickettsia_Rickettsia_endosymbiont_of_Nosopsyllus_laeviceps_laeviceps
1	Bacteria_Proteobacteria_Alphaproteobacteria_Rickettsiales_Rickettsiaceae_Rickettsia_Rickettsia_endosymbiont_of_Meloidae_species
1	Bacteria_Proteobacteria_Alphaproteobacteria_Rickettsiales_Rickettsiaceae_Rickettsia_Rickettsia_endosymbiont_of_Chrysoperla_lucasina
1	Bacteria_Proteobacteria_Alphaproteobacteria_Rickettsiales_Rickettsiaceae_Rickettsia_Rickettsia_endosymbiont_of_Amblyomma_naponense
1	Bacteria_Proteobacteria_Alphaproteobacteria_Rickettsiales_Anaplasmataceae_Wolbachia_Wolbachia_endosymbiont_of_Odontotermes_horni
1	Bacteria_Proteobacteria_Alphaproteobacteria_Rhodospirillales_Acetobacteraceae_Roseococcus_uncultured_Roseococcus_sp.
1	Bacteria_Proteobacteria_Alphaproteobacteria_Rhizobiales_Bradyrhizobiaceae_NA_uncultured_Bradyrhizobiaceae_bacterium
1	Bacteria_Proteobacteria_Alphaproteobacteria_Rhizobiales_Bradyrhizobiaceae_Bradyrhizobium_Bradyrhizobium_sp._UFLA03_323
1	Bacteria_Proteobacteria_Alphaproteobacteria_Rhizobiales_Bradyrhizobiaceae_Bradyrhizobium_Bradyrhizobium_sp._Phr-5
1	Bacteria_Firmicutes_Clostridia_Clostridiales_Peptostreptococcaceae_Peptostreptococcus_Peptostreptococcus_anaerobius
1	Bacteria_Firmicutes_Bacilli_Bacillales_Staphylococcaceae_Aliicoccus_uncultured_Aliicoccus_sp.
1	Bacteria_Bacteroidetes_Saprospiria_Saprospirales_Haliscomenobacteraceae_Haliscomenobacter_uncultured_Haliscomenobacter_sp.

## Sheet: NWSE
38	Eukaryota_Rhodophyta_Bangiophyceae_Cyanidiales_Cyanidiaceae_Cyanidioschyzon	x
29	Bacteria_Bacteroidetes_Saprospiria_Saprospirales_Saprospiraceae_NA	x
17	Bacteria_Actinobacteria_Actinobacteria_NA_NA_NA	x
14	Bacteria_Firmicutes_Bacilli_Lactobacillales_Streptococcaceae_Streptococcus	x
13	Bacteria_Firmicutes_Bacilli_Bacillales_Staphylococcaceae_Staphylococcus	x
12	Eukaryota_Streptophyta_Magnoliopsida_Fagales_Betulaceae_Carpinus	x
12	Bacteria_Cyanobacteria_NA_NA_NA_NA	x
10	Bacteria_Proteobacteria_Gammaproteobacteria_Enterobacterales_Enterobacteriaceae_Escherichia	x
8	Bacteria_Firmicutes_Bacilli_Bacillales_NA_Exiguobacterium	x
7	Eukaryota_Streptophyta_Magnoliopsida_Malpighiales_Salicaceae_Populus	x
7	Bacteria_Proteobacteria_Alphaproteobacteria_Rhodobacterales_Rhodobacteraceae_Rhodobacter	x
5	NA_NA_NA_NA_NA_NA	x
1	Eukaryota_NA_NA_NA_NA_NA	x
1	Bacteria_Firmicutes_Clostridia_Clostridiales_Peptostreptococcaceae_Peptostreptococcus	x
1	Bacteria_Firmicutes_Bacilli_Bacillales_Staphylococcaceae_Aliicoccus	x
1	Bacteria_Bacteroidetes_Saprospiria_Saprospirales_Haliscomenobacteraceae_Haliscomenobacter	x
181784	Bacteria_Proteobacteria_Alphaproteobacteria_Rickettsiales_Rickettsiaceae_Rickettsia
6157	Bacteria_Spirochaetes_Spirochaetia_Spirochaetales_Borreliaceae_Borreliella
317	Bacteria_NA_NA_NA_NA_NA
89	Bacteria_Proteobacteria_Alphaproteobacteria_Rickettsiales_Anaplasmataceae_Wolbachia
32	Bacteria_Proteobacteria_Alphaproteobacteria_Rhizobiales_Bradyrhizobiaceae_Bradyrhizobium
26	Bacteria_Candidatus Microgenomates_NA_NA_NA_NA
21	Archaea_NA_NA_NA_NA_NA
17	Bacteria_Proteobacteria_Betaproteobacteria_Burkholderiales_NA_Tepidimonas
12	Bacteria_Proteobacteria_Alphaproteobacteria_Rickettsiales_Anaplasmataceae_NA
6	Bacteria_Bacteroidetes_Flavobacteriia_Flavobacteriales_Flavobacteriaceae_Gillisia
6	Bacteria_Actinobacteria_Actinobacteria_Micrococcales_Dermabacteraceae_Brachybacterium
3	Bacteria_Proteobacteria_Gammaproteobacteria_Pseudomonadales_Pseudomonadaceae_Pseudomonas
1	Eukaryota_Streptophyta_Magnoliopsida_Rosales_Cannabaceae_Cannabis
1	Bacteria_Proteobacteria_Alphaproteobacteria_Rhodospirillales_Acetobacteraceae_Roseococcus
1	Bacteria_Proteobacteria_Alphaproteobacteria_Rhizobiales_Bradyrhizobiaceae_NA

## Sheet: NEW NWSE REDUCED
Proteobacteria_Rickettsia	181784
Spirochaetes_Borreliella	6157
Uncultured bacterium	317
Proteobacteria_Wolbachia	89
Proteobacteria_Bradyrhizobium	32
Candidatus Microgenomates_NA	26
Uncultured Archaea	21
Proteobacteria_Tepidimonas	17
Proteobacteria_Anaplasmataceae_NA	12
Bacteroidetes_Gillisia	6
Actinobacteria_Brachybacterium	6
Proteobacteria_Pseudomonas	3
Proteobacteria_Roseococcus	1
Proteobacteria_NA	1
	188472
