# Supplementary material for: Comparative hologenomics of two Ixodes scapularis tick populations in New Jersey
Source: PeerJ. 2021 Nov 9;9:e12313. doi: 10.7717/peerj.12313 (PMC8588856; doi:10.7717/peerj.12313)
Supplement: Supplemental Information 6 — Homology searches performed using BLASTn against the NCBI ’nt’ nucleotide database with NWSE (left) and PVIL (right) merged 16S amplicon reads. The corresponding top-hit accession numbers were annotated with assigned NCBI taxonomy using taxonomizr and appended to BLAST output. These data are summarized in Table S2. [file peerj-09-12313-s006.xlsx]

## Sheet: Sheet1
NWSE														PVIL
Merged amplicon	NCBI accession	% aln	aln len	mismatches	indels	Q start	Q end	S start	S end	e-value	bitscore	NCBI Taxonomy		Merged amplicon	NCBI accession	% aln	aln len	mismatches	indels	Q start	Q end	S start	S end	e-value	bitscore	NCBI Taxonomy
NWSE-merged-M01780:105:000000000-CWNB3:1:2104:5226:9728	HQ330706.1	90.13	385	38	0	1	385	215	599	1.05e-137	501	Archaea_NA_NA_NA_NA_NA_uncultured archaeon		PVIL-merged-M01780:105:000000000-CWNB3:1:1104:21796:20137	CP040020.1	100	409	0	0	1	409	1717429	1717837	0	756	Bacteria_Actinobacteria_Actinobacteria_Micrococcales_Brevibacteriaceae_Brevibacterium_Brevibacterium sp. CS2
NWSE-merged-M01780:105:000000000-CWNB3:1:1104:25457:18345	KX856472.1	100	384	0	0	1	384	272	655	0	710	Archaea_NA_NA_NA_NA_NA_uncultured archaeon		PVIL-merged-M01780:105:000000000-CWNB3:1:2109:2427:10552	CP040020.1	100	409	0	0	1	409	1717429	1717837	0	756	Bacteria_Actinobacteria_Actinobacteria_Micrococcales_Brevibacteriaceae_Brevibacterium_Brevibacterium sp. CS2
NWSE-merged-M01780:105:000000000-CWNB3:1:1109:20640:10739	KX856472.1	99.74	384	1	0	1	384	272	655	0	704	Archaea_NA_NA_NA_NA_NA_uncultured archaeon		PVIL-merged-M01780:105:000000000-CWNB3:1:2112:22885:6426	CP040020.1	100	409	0	0	1	409	1717429	1717837	0	756	Bacteria_Actinobacteria_Actinobacteria_Micrococcales_Brevibacteriaceae_Brevibacterium_Brevibacterium sp. CS2
NWSE-merged-M01780:105:000000000-CWNB3:1:2118:22949:6011	KX856472.1	100	384	0	0	1	384	272	655	0	710	Archaea_NA_NA_NA_NA_NA_uncultured archaeon		PVIL-merged-M01780:105:000000000-CWNB3:1:2109:5266:6936	CP040020.1	98.533	409	6	0	1	409	1717429	1717837	0	723	Bacteria_Actinobacteria_Actinobacteria_Micrococcales_Brevibacteriaceae_Brevibacterium_Brevibacterium sp. CS2
NWSE-merged-M01780:105:000000000-CWNB3:1:2110:8882:15062	KX856472.1	99.74	384	1	0	1	384	272	655	0	704	Archaea_NA_NA_NA_NA_NA_uncultured archaeon		PVIL-merged-M01780:105:000000000-CWNB3:1:2119:23994:8803	CP040020.1	99.022	409	4	0	1	409	1717429	1717837	0	736	Bacteria_Actinobacteria_Actinobacteria_Micrococcales_Brevibacteriaceae_Brevibacterium_Brevibacterium sp. CS2
NWSE-merged-M01780:105:000000000-CWNB3:1:1118:26550:8316	KX856472.1	100	384	0	0	1	384	272	655	0	710	Archaea_NA_NA_NA_NA_NA_uncultured archaeon		PVIL-merged-M01780:105:000000000-CWNB3:1:1109:25623:18809	CP040020.1	100	409	0	0	1	409	1717429	1717837	0	756	Bacteria_Actinobacteria_Actinobacteria_Micrococcales_Brevibacteriaceae_Brevibacterium_Brevibacterium sp. CS2
NWSE-merged-M01780:105:000000000-CWNB3:1:1108:16914:21820	KX856472.1	100	384	0	0	1	384	272	655	0	710	Archaea_NA_NA_NA_NA_NA_uncultured archaeon		PVIL-merged-M01780:105:000000000-CWNB3:1:2113:24823:16363	MH701861.1	100	405	0	0	1	405	330	734	0	749	Bacteria_Actinobacteria_Actinobacteria_Micrococcales_Intrasporangiaceae_Ornithinimicrobium_Ornithinimicrobium sp.
NWSE-merged-M01780:105:000000000-CWNB3:1:1106:5039:15796	HQ269162.1	99.486	389	2	0	1	389	273	661	0	708	Archaea_NA_NA_NA_NA_NA_uncultured archaeon		PVIL-merged-M01780:105:000000000-CWNB3:1:1101:20856:7637	MH701861.1	100	405	0	0	1	405	330	734	0	749	Bacteria_Actinobacteria_Actinobacteria_Micrococcales_Intrasporangiaceae_Ornithinimicrobium_Ornithinimicrobium sp.
NWSE-merged-M01780:105:000000000-CWNB3:1:1104:27523:13615	KX856472.1	97.917	384	8	0	1	384	272	655	0	665	Archaea_NA_NA_NA_NA_NA_uncultured archaeon		PVIL-merged-M01780:105:000000000-CWNB3:1:1101:25976:9239	MH701861.1	99.753	405	1	0	1	405	330	734	0	743	Bacteria_Actinobacteria_Actinobacteria_Micrococcales_Intrasporangiaceae_Ornithinimicrobium_Ornithinimicrobium sp.
NWSE-merged-M01780:105:000000000-CWNB3:1:1113:23855:20669	HQ330706.1	93.766	385	24	0	1	385	215	599	4.73e-161	579	Archaea_NA_NA_NA_NA_NA_uncultured archaeon		PVIL-merged-M01780:105:000000000-CWNB3:1:1115:28970:9645	MH701861.1	99.753	405	1	0	1	405	330	734	0	743	Bacteria_Actinobacteria_Actinobacteria_Micrococcales_Intrasporangiaceae_Ornithinimicrobium_Ornithinimicrobium sp.
NWSE-merged-M01780:105:000000000-CWNB3:1:1112:7725:14613	KX856472.1	98.438	384	6	0	1	384	272	655	0	676	Archaea_NA_NA_NA_NA_NA_uncultured archaeon		PVIL-merged-M01780:105:000000000-CWNB3:1:2111:25439:21106	MH701861.1	99.506	405	1	1	1	404	330	734	0	736	Bacteria_Actinobacteria_Actinobacteria_Micrococcales_Intrasporangiaceae_Ornithinimicrobium_Ornithinimicrobium sp.
NWSE-merged-M01780:105:000000000-CWNB3:1:1105:24934:11188	HQ330706.1	94.026	385	23	0	1	385	215	599	1.02e-162	584	Archaea_NA_NA_NA_NA_NA_uncultured archaeon		PVIL-merged-M01780:105:000000000-CWNB3:1:2102:19609:23805	MN885720.1	100	400	0	0	1	400	282	681	0	739	Bacteria_Deinococcus-Thermus_Deinococci_Thermales_Thermaceae_Meiothermus_Meiothermus sp.
NWSE-merged-M01780:105:000000000-CWNB3:1:2111:20221:18773	KX856472.1	100	384	0	0	1	384	272	655	0	710	Archaea_NA_NA_NA_NA_NA_uncultured archaeon		PVIL-merged-M01780:105:000000000-CWNB3:1:1104:10787:9805	MN885720.1	100	400	0	0	1	400	282	681	0	739	Bacteria_Deinococcus-Thermus_Deinococci_Thermales_Thermaceae_Meiothermus_Meiothermus sp.
NWSE-merged-M01780:105:000000000-CWNB3:1:2114:6701:7327	HQ330706.1	92.727	385	28	0	1	385	215	599	2.22e-154	556	Archaea_NA_NA_NA_NA_NA_uncultured archaeon		PVIL-merged-M01780:105:000000000-CWNB3:1:2106:9795:10348	MN885720.1	100	400	0	0	1	400	282	681	0	739	Bacteria_Deinococcus-Thermus_Deinococci_Thermales_Thermaceae_Meiothermus_Meiothermus sp.
NWSE-merged-M01780:105:000000000-CWNB3:1:1119:26302:20208	HQ330706.1	92.658	395	29	0	1	395	215	609	2.94e-158	569	Archaea_NA_NA_NA_NA_NA_uncultured archaeon		PVIL-merged-M01780:105:000000000-CWNB3:1:2105:7115:12676	MH549503.1	97.658	427	10	0	1	427	2	428	0	734	Bacteria_Firmicutes_Bacilli_Bacillales_Staphylococcaceae_Aliicoccus_uncultured Aliicoccus sp.
NWSE-merged-M01780:105:000000000-CWNB3:1:1113:19764:10789	HQ330706.1	93.247	385	26	0	1	385	215	599	1.02e-157	568	Archaea_NA_NA_NA_NA_NA_uncultured archaeon		PVIL-merged-M01780:105:000000000-CWNB3:1:2105:25108:5180	MH549503.1	99.532	427	2	0	1	427	2	428	0	778	Bacteria_Firmicutes_Bacilli_Bacillales_Staphylococcaceae_Aliicoccus_uncultured Aliicoccus sp.
NWSE-merged-M01780:105:000000000-CWNB3:1:1110:23258:15728	HQ330706.1	94.026	385	23	0	1	385	215	599	1.02e-162	584	Archaea_NA_NA_NA_NA_NA_uncultured archaeon		PVIL-merged-M01780:105:000000000-CWNB3:1:2111:15218:18056	MH549503.1	100	427	0	0	1	427	2	428	0	789	Bacteria_Firmicutes_Bacilli_Bacillales_Staphylococcaceae_Aliicoccus_uncultured Aliicoccus sp.
NWSE-merged-M01780:105:000000000-CWNB3:1:2101:5023:16985	KX856472.1	99.74	384	1	0	1	384	272	655	0	704	Archaea_NA_NA_NA_NA_NA_uncultured archaeon		PVIL-merged-M01780:105:000000000-CWNB3:1:2108:20924:1858	MH549503.1	99.532	427	2	0	1	427	2	428	0	778	Bacteria_Firmicutes_Bacilli_Bacillales_Staphylococcaceae_Aliicoccus_uncultured Aliicoccus sp.
NWSE-merged-M01780:105:000000000-CWNB3:1:1111:16887:18951	HQ330706.1	94.026	385	23	0	1	385	215	599	1.02e-162	584	Archaea_NA_NA_NA_NA_NA_uncultured archaeon		PVIL-merged-M01780:105:000000000-CWNB3:1:1115:7560:17247	MK034287.1	99.532	427	2	0	1	427	327	753	0	778	Bacteria_Firmicutes_Bacilli_Bacillales_Staphylococcaceae_Jeotgalicoccus_Jeotgalicoccus sp.
NWSE-merged-M01780:105:000000000-CWNB3:1:2105:26027:10939	HQ330706.1	94.026	385	23	0	1	385	215	599	1.02e-162	584	Archaea_NA_NA_NA_NA_NA_uncultured archaeon		PVIL-merged-M01780:105:000000000-CWNB3:1:2109:11455:12186	MK034287.1	100	427	0	0	1	427	327	753	0	789	Bacteria_Firmicutes_Bacilli_Bacillales_Staphylococcaceae_Jeotgalicoccus_Jeotgalicoccus sp.
NWSE-merged-M01780:105:000000000-CWNB3:1:1105:25665:9212	KX856472.1	100	384	0	0	1	384	272	655	0	710	Archaea_NA_NA_NA_NA_NA_uncultured archaeon		PVIL-merged-M01780:105:000000000-CWNB3:1:1112:17926:14335	MK034287.1	100	427	0	0	1	427	327	753	0	789	Bacteria_Firmicutes_Bacilli_Bacillales_Staphylococcaceae_Jeotgalicoccus_Jeotgalicoccus sp.
NWSE-merged-M01780:105:000000000-CWNB3:1:2115:14817:17828	MT386331.1	99.754	407	1	0	1	407	313	719	0	747	Bacteria_Actinobacteria_Actinobacteria_Micrococcales_Dermabacteraceae_Brachybacterium_Brachybacterium conglomeratum		PVIL-merged-M01780:105:000000000-CWNB3:1:1109:12830:10164	MK034287.1	99.537	432	2	0	1	432	327	758	0	787	Bacteria_Firmicutes_Bacilli_Bacillales_Staphylococcaceae_Jeotgalicoccus_Jeotgalicoccus sp.
NWSE-merged-M01780:105:000000000-CWNB3:1:1109:19814:7184	MT386331.1	100	407	0	0	1	407	313	719	0	752	Bacteria_Actinobacteria_Actinobacteria_Micrococcales_Dermabacteraceae_Brachybacterium_Brachybacterium conglomeratum		PVIL-merged-M01780:105:000000000-CWNB3:1:2118:14853:17230	MK034287.1	100	427	0	0	1	427	327	753	0	789	Bacteria_Firmicutes_Bacilli_Bacillales_Staphylococcaceae_Jeotgalicoccus_Jeotgalicoccus sp.
NWSE-merged-M01780:105:000000000-CWNB3:1:1118:12525:3786	MT386331.1	99.754	407	1	0	1	407	313	719	0	747	Bacteria_Actinobacteria_Actinobacteria_Micrococcales_Dermabacteraceae_Brachybacterium_Brachybacterium conglomeratum		PVIL-merged-M01780:105:000000000-CWNB3:1:1109:6149:5628	MK034287.1	99.765	425	1	0	3	427	329	753	0	780	Bacteria_Firmicutes_Bacilli_Bacillales_Staphylococcaceae_Jeotgalicoccus_Jeotgalicoccus sp.
NWSE-merged-M01780:105:000000000-CWNB3:1:1117:19576:23727	MT386331.1	100	407	0	0	1	407	313	719	0	752	Bacteria_Actinobacteria_Actinobacteria_Micrococcales_Dermabacteraceae_Brachybacterium_Brachybacterium conglomeratum		PVIL-merged-M01780:105:000000000-CWNB3:1:1112:18526:21144	KP183066.1	99.063	427	4	0	1	427	358	784	0	767	Bacteria_Firmicutes_Bacilli_Bacillales_Staphylococcaceae_Jeotgalicoccus_uncultured Jeotgalicoccus sp.
NWSE-merged-M01780:105:000000000-CWNB3:1:2104:16501:4152	MT386331.1	100	407	0	0	1	407	313	719	0	752	Bacteria_Actinobacteria_Actinobacteria_Micrococcales_Dermabacteraceae_Brachybacterium_Brachybacterium conglomeratum		PVIL-merged-M01780:105:000000000-CWNB3:1:2101:26491:9191	KF598754.1	98.771	407	5	0	1	407	313	719	0	725	Bacteria_NA_NA_NA_NA_NA_uncultured bacterium
NWSE-merged-M01780:105:000000000-CWNB3:1:1108:4526:10478	MT386331.1	97.789	407	9	0	1	407	313	719	0	702	Bacteria_Actinobacteria_Actinobacteria_Micrococcales_Dermabacteraceae_Brachybacterium_Brachybacterium conglomeratum		PVIL-merged-M01780:105:000000000-CWNB3:1:2105:22813:18385	KF003161.1	99.532	427	2	0	1	427	330	756	0	778	Bacteria_NA_NA_NA_NA_NA_uncultured bacterium
NWSE-merged-M01780:105:000000000-CWNB3:1:2116:26001:16743	EU196300.1	99.763	422	1	0	1	422	346	767	0	774	Bacteria_Bacteroidetes_Flavobacteriia_Flavobacteriales_Flavobacteriaceae_Gillisia_Gillisia sp. NP8		PVIL-merged-M01780:105:000000000-CWNB3:1:1117:6981:15905	DQ068921.1	99.751	402	1	0	1	402	336	737	0	737	Bacteria_NA_NA_NA_NA_NA_uncultured bacterium
NWSE-merged-M01780:105:000000000-CWNB3:1:2106:14282:11334	EU196300.1	99.763	422	1	0	1	422	346	767	0	774	Bacteria_Bacteroidetes_Flavobacteriia_Flavobacteriales_Flavobacteriaceae_Gillisia_Gillisia sp. NP8		PVIL-merged-M01780:105:000000000-CWNB3:1:2114:15358:18937	DQ068921.1	98.756	402	5	0	1	402	336	737	0	715	Bacteria_NA_NA_NA_NA_NA_uncultured bacterium
NWSE-merged-M01780:105:000000000-CWNB3:1:2117:24478:21670	EU196300.1	98.341	422	7	0	1	422	346	767	0	741	Bacteria_Bacteroidetes_Flavobacteriia_Flavobacteriales_Flavobacteriaceae_Gillisia_Gillisia sp. NP8		PVIL-merged-M01780:105:000000000-CWNB3:1:1115:7081:10989	DQ068883.1	99.751	402	1	0	1	402	336	737	0	737	Bacteria_NA_NA_NA_NA_NA_uncultured bacterium
NWSE-merged-M01780:105:000000000-CWNB3:1:1117:19813:18182	EU196300.1	99.763	422	1	0	1	422	346	767	0	774	Bacteria_Bacteroidetes_Flavobacteriia_Flavobacteriales_Flavobacteriaceae_Gillisia_Gillisia sp. NP8		PVIL-merged-M01780:105:000000000-CWNB3:1:2119:20218:21474	GQ302935.1	97.257	401	11	0	2	402	333	733	0	680	Bacteria_NA_NA_NA_NA_NA_uncultured bacterium
NWSE-merged-M01780:105:000000000-CWNB3:1:2109:8136:18698	EU196300.1	98.104	422	8	0	1	422	346	767	0	736	Bacteria_Bacteroidetes_Flavobacteriia_Flavobacteriales_Flavobacteriaceae_Gillisia_Gillisia sp. NP8		PVIL-merged-M01780:105:000000000-CWNB3:1:1116:13143:17265	JQ385132.2	100	402	0	0	1	402	321	722	0	743	Bacteria_NA_NA_NA_NA_NA_uncultured bacterium
NWSE-merged-M01780:105:000000000-CWNB3:1:2112:14072:7670	EU196300.1	99.763	422	1	0	1	422	346	767	0	774	Bacteria_Bacteroidetes_Flavobacteriia_Flavobacteriales_Flavobacteriaceae_Gillisia_Gillisia sp. NP8		PVIL-merged-M01780:105:000000000-CWNB3:1:1115:13243:10992	KF598754.1	97.264	402	11	0	1	402	313	714	0	682	Bacteria_NA_NA_NA_NA_NA_uncultured bacterium
NWSE-merged-M01780:105:000000000-CWNB3:1:1106:12813:9925	AF050605.1	98.741	397	5	0	1	397	433	829	0	706	Bacteria_Candidatus Microgenomates_NA_NA_NA_NA_uncultured eubacterium WCHB1-56		PVIL-merged-M01780:105:000000000-CWNB3:1:1117:16585:19500	DQ068921.1	99.502	402	2	0	1	402	336	737	0	732	Bacteria_NA_NA_NA_NA_NA_uncultured bacterium
NWSE-merged-M01780:105:000000000-CWNB3:1:1110:19591:7132	AF050605.1	98.741	397	5	0	1	397	433	829	0	706	Bacteria_Candidatus Microgenomates_NA_NA_NA_NA_uncultured eubacterium WCHB1-56		PVIL-merged-M01780:105:000000000-CWNB3:1:2105:10219:19030	KM499057.1	99.766	427	1	0	1	427	285	711	0	784	Bacteria_NA_NA_NA_NA_NA_uncultured bacterium
NWSE-merged-M01780:105:000000000-CWNB3:1:1101:29173:15246	AF050605.1	98.741	397	5	0	1	397	433	829	0	706	Bacteria_Candidatus Microgenomates_NA_NA_NA_NA_uncultured eubacterium WCHB1-56		PVIL-merged-M01780:105:000000000-CWNB3:1:2113:9335:18894	LC409948.1	99.063	427	4	0	1	427	273	699	0	767	Bacteria_NA_NA_NA_NA_NA_uncultured bacterium
NWSE-merged-M01780:105:000000000-CWNB3:1:1105:25699:3897	AF050605.1	97.733	397	9	0	1	397	433	829	0	684	Bacteria_Candidatus Microgenomates_NA_NA_NA_NA_uncultured eubacterium WCHB1-56		PVIL-merged-M01780:105:000000000-CWNB3:1:1105:19853:12256	DQ068921.1	95.642	413	16	2	1	412	336	747	0	662	Bacteria_NA_NA_NA_NA_NA_uncultured bacterium
NWSE-merged-M01780:105:000000000-CWNB3:1:1101:22632:9425	AF050605.1	98.741	397	5	0	1	397	433	829	0	706	Bacteria_Candidatus Microgenomates_NA_NA_NA_NA_uncultured eubacterium WCHB1-56		PVIL-merged-M01780:105:000000000-CWNB3:1:2101:10830:14262	EU778444.1	100	427	0	0	1	427	351	777	0	789	Bacteria_NA_NA_NA_NA_NA_uncultured bacterium
NWSE-merged-M01780:105:000000000-CWNB3:1:1101:13412:24541	AF050605.1	98.489	397	6	0	1	397	433	829	0	701	Bacteria_Candidatus Microgenomates_NA_NA_NA_NA_uncultured eubacterium WCHB1-56		PVIL-merged-M01780:105:000000000-CWNB3:1:2112:28297:17351	KF003161.1	99.766	427	1	0	1	427	330	756	0	784	Bacteria_NA_NA_NA_NA_NA_uncultured bacterium
NWSE-merged-M01780:105:000000000-CWNB3:1:1112:23023:5280	AF050605.1	98.741	397	5	0	1	397	433	829	0	706	Bacteria_Candidatus Microgenomates_NA_NA_NA_NA_uncultured eubacterium WCHB1-56		PVIL-merged-M01780:105:000000000-CWNB3:1:1104:14631:10447	KF598756.1	97.537	406	10	0	2	407	309	714	0	697	Bacteria_NA_NA_NA_NA_NA_uncultured bacterium
NWSE-merged-M01780:105:000000000-CWNB3:1:1119:24884:10350	AF050605.1	98.741	397	5	0	1	397	433	829	0	706	Bacteria_Candidatus Microgenomates_NA_NA_NA_NA_uncultured eubacterium WCHB1-56		PVIL-merged-M01780:105:000000000-CWNB3:1:1115:5797:10485	KF598756.1	95.792	404	17	0	1	404	313	716	0	652	Bacteria_NA_NA_NA_NA_NA_uncultured bacterium
NWSE-merged-M01780:105:000000000-CWNB3:1:1108:21536:20370	AF050605.1	98.741	397	5	0	1	397	433	829	0	706	Bacteria_Candidatus Microgenomates_NA_NA_NA_NA_uncultured eubacterium WCHB1-56		PVIL-merged-M01780:105:000000000-CWNB3:1:1115:14414:19854	JQ381956.2	97.03	404	12	0	1	404	333	736	0	680	Bacteria_NA_NA_NA_NA_NA_uncultured bacterium
NWSE-merged-M01780:105:000000000-CWNB3:1:1118:25929:21027	AF050605.1	98.741	397	5	0	1	397	433	829	0	706	Bacteria_Candidatus Microgenomates_NA_NA_NA_NA_uncultured eubacterium WCHB1-56		PVIL-merged-M01780:105:000000000-CWNB3:1:1116:3764:17372	JQ382228.2	96.269	402	15	0	1	402	332	733	0	660	Bacteria_NA_NA_NA_NA_NA_uncultured bacterium
NWSE-merged-M01780:105:000000000-CWNB3:1:2104:13008:16380	AF050605.1	98.741	397	5	0	1	397	433	829	0	706	Bacteria_Candidatus Microgenomates_NA_NA_NA_NA_uncultured eubacterium WCHB1-56		PVIL-merged-M01780:105:000000000-CWNB3:1:1115:11128:15039	JQ046612.1	97.015	402	12	0	1	402	281	682	0	676	Bacteria_NA_NA_NA_NA_NA_uncultured bacterium
NWSE-merged-M01780:105:000000000-CWNB3:1:1110:6992:17069	AF050605.1	98.489	397	6	0	1	397	433	829	0	701	Bacteria_Candidatus Microgenomates_NA_NA_NA_NA_uncultured eubacterium WCHB1-56		PVIL-merged-M01780:105:000000000-CWNB3:1:2102:22398:5055	KF598756.1	96.287	404	15	0	1	404	313	716	0	664	Bacteria_NA_NA_NA_NA_NA_uncultured bacterium
NWSE-merged-M01780:105:000000000-CWNB3:1:1117:14164:11778	AF050605.1	98.741	397	5	0	1	397	433	829	0	706	Bacteria_Candidatus Microgenomates_NA_NA_NA_NA_uncultured eubacterium WCHB1-56		PVIL-merged-M01780:105:000000000-CWNB3:1:2113:4717:20907	KF003161.1	98.361	427	7	0	1	427	330	756	0	752	Bacteria_NA_NA_NA_NA_NA_uncultured bacterium
NWSE-merged-M01780:105:000000000-CWNB3:1:1119:12513:19697	AF050605.1	97.481	397	10	0	1	397	433	829	0	678	Bacteria_Candidatus Microgenomates_NA_NA_NA_NA_uncultured eubacterium WCHB1-56		PVIL-merged-M01780:105:000000000-CWNB3:1:2112:27270:10787	JQ380822.2	99.752	403	1	0	1	403	333	735	0	739	Bacteria_NA_NA_NA_NA_NA_uncultured bacterium
NWSE-merged-M01780:105:000000000-CWNB3:1:1103:12479:12884	AF050605.1	97.481	397	10	0	1	397	433	829	0	678	Bacteria_Candidatus Microgenomates_NA_NA_NA_NA_uncultured eubacterium WCHB1-56		PVIL-merged-M01780:105:000000000-CWNB3:1:1116:9659:4240	KF598756.1	97.27	403	9	2	1	402	313	714	0	682	Bacteria_NA_NA_NA_NA_NA_uncultured bacterium
NWSE-merged-M01780:105:000000000-CWNB3:1:2103:23937:23054	AF050605.1	97.733	397	9	0	1	397	433	829	0	684	Bacteria_Candidatus Microgenomates_NA_NA_NA_NA_uncultured eubacterium WCHB1-56		PVIL-merged-M01780:105:000000000-CWNB3:1:2113:12001:10199	KF598756.1	98.254	401	5	2	1	400	313	712	0	701	Bacteria_NA_NA_NA_NA_NA_uncultured bacterium
NWSE-merged-M01780:105:000000000-CWNB3:1:1101:13052:21250	AF050605.1	98.741	397	5	0	1	397	433	829	0	706	Bacteria_Candidatus Microgenomates_NA_NA_NA_NA_uncultured eubacterium WCHB1-56		PVIL-merged-M01780:105:000000000-CWNB3:1:2110:11760:4900	KF598756.1	95.761	401	17	0	1	401	313	713	0	647	Bacteria_NA_NA_NA_NA_NA_uncultured bacterium
NWSE-merged-M01780:105:000000000-CWNB3:1:1104:25750:9284	AF050605.1	98.489	397	6	0	1	397	433	829	0	701	Bacteria_Candidatus Microgenomates_NA_NA_NA_NA_uncultured eubacterium WCHB1-56		PVIL-merged-M01780:105:000000000-CWNB3:1:1104:6428:14582	MG804606.1	95.05	404	16	4	1	402	20	421	3.76e-177	632	Bacteria_NA_NA_NA_NA_NA_uncultured bacterium
NWSE-merged-M01780:105:000000000-CWNB3:1:2106:23719:20473	AF050605.1	97.229	397	11	0	1	397	433	829	0	675	Bacteria_Candidatus Microgenomates_NA_NA_NA_NA_uncultured eubacterium WCHB1-56		PVIL-merged-M01780:105:000000000-CWNB3:1:1108:13849:8140	KF598756.1	98.511	403	4	2	1	402	313	714	0	710	Bacteria_NA_NA_NA_NA_NA_uncultured bacterium
NWSE-merged-M01780:105:000000000-CWNB3:1:1115:14964:4365	AF050605.1	96.474	397	14	0	1	397	433	829	0	656	Bacteria_Candidatus Microgenomates_NA_NA_NA_NA_uncultured eubacterium WCHB1-56		PVIL-merged-M01780:105:000000000-CWNB3:1:2102:22127:14381	KF003161.1	99.766	427	1	0	1	427	330	756	0	784	Bacteria_NA_NA_NA_NA_NA_uncultured bacterium
NWSE-merged-M01780:105:000000000-CWNB3:1:1118:19060:6926	AF050605.1	98.741	397	5	0	1	397	433	829	0	706	Bacteria_Candidatus Microgenomates_NA_NA_NA_NA_uncultured eubacterium WCHB1-56		PVIL-merged-M01780:105:000000000-CWNB3:1:1119:8589:11801	KF598756.1	99.254	402	3	0	1	402	313	714	0	726	Bacteria_NA_NA_NA_NA_NA_uncultured bacterium
NWSE-merged-M01780:105:000000000-CWNB3:1:1103:17661:13787	AF050605.1	98.489	397	6	0	1	397	433	829	0	701	Bacteria_Candidatus Microgenomates_NA_NA_NA_NA_uncultured eubacterium WCHB1-56		PVIL-merged-M01780:105:000000000-CWNB3:1:2107:24290:13673	JQ382688.2	96.2	421	16	0	1	421	332	752	0	689	Bacteria_NA_NA_NA_NA_NA_uncultured bacterium
NWSE-merged-M01780:105:000000000-CWNB3:1:2109:16057:18097	AF050605.1	98.741	397	5	0	1	397	433	829	0	706	Bacteria_Candidatus Microgenomates_NA_NA_NA_NA_uncultured eubacterium WCHB1-56		PVIL-merged-M01780:105:000000000-CWNB3:1:1116:26160:13317	JQ381957.2	97.264	402	11	0	1	402	333	734	0	682	Bacteria_NA_NA_NA_NA_NA_uncultured bacterium
NWSE-merged-M01780:105:000000000-CWNB3:1:2119:15728:23033	AF050605.1	98.741	397	5	0	1	397	433	829	0	706	Bacteria_Candidatus Microgenomates_NA_NA_NA_NA_uncultured eubacterium WCHB1-56		PVIL-merged-M01780:105:000000000-CWNB3:1:1112:14712:5368	KF598756.1	96.269	402	15	0	1	402	313	714	0	660	Bacteria_NA_NA_NA_NA_NA_uncultured bacterium
NWSE-merged-M01780:105:000000000-CWNB3:1:2109:21182:11856	AF050605.1	98.741	397	5	0	1	397	433	829	0	706	Bacteria_Candidatus Microgenomates_NA_NA_NA_NA_uncultured eubacterium WCHB1-56		PVIL-merged-M01780:105:000000000-CWNB3:1:1113:4698:6283	KF598754.1	97.512	402	10	0	1	402	313	714	0	688	Bacteria_NA_NA_NA_NA_NA_uncultured bacterium
NWSE-merged-M01780:105:000000000-CWNB3:1:1105:25589:7026	AF050605.1	98.741	397	5	0	1	397	433	829	0	706	Bacteria_Candidatus Microgenomates_NA_NA_NA_NA_uncultured eubacterium WCHB1-56		PVIL-merged-M01780:105:000000000-CWNB3:1:1114:13052:5329	DQ068921.1	97.512	402	10	0	1	402	336	737	0	688	Bacteria_NA_NA_NA_NA_NA_uncultured bacterium
NWSE-merged-M01780:105:000000000-CWNB3:1:1105:15219:9058	MH091464.1	99.005	402	4	0	1	402	258	659	0	721	Bacteria_NA_NA_NA_NA_NA_bacterium		PVIL-merged-M01780:105:000000000-CWNB3:1:2110:8079:8527	JQ382228.2	97.015	402	12	0	1	402	332	733	0	676	Bacteria_NA_NA_NA_NA_NA_uncultured bacterium
NWSE-merged-M01780:105:000000000-CWNB3:1:2114:13928:16999	MH091464.1	100	409	0	0	1	409	258	666	0	756	Bacteria_NA_NA_NA_NA_NA_bacterium		PVIL-merged-M01780:105:000000000-CWNB3:1:2109:14715:18011	KF598756.1	99.502	402	2	0	1	402	313	714	0	732	Bacteria_NA_NA_NA_NA_NA_uncultured bacterium
NWSE-merged-M01780:105:000000000-CWNB3:1:1118:11723:18753	MH091464.1	100	402	0	0	1	402	258	659	0	743	Bacteria_NA_NA_NA_NA_NA_bacterium		PVIL-merged-M01780:105:000000000-CWNB3:1:2112:21323:9908	DQ068921.1	99.502	402	2	0	1	402	336	737	0	732	Bacteria_NA_NA_NA_NA_NA_uncultured bacterium
NWSE-merged-M01780:105:000000000-CWNB3:1:1108:26143:11285	MH091464.1	100	402	0	0	1	402	258	659	0	743	Bacteria_NA_NA_NA_NA_NA_bacterium		PVIL-merged-M01780:105:000000000-CWNB3:1:2104:25801:12229	KJ454074.1	99.751	402	1	0	1	402	322	723	0	737	Bacteria_NA_NA_NA_NA_NA_uncultured bacterium
NWSE-merged-M01780:105:000000000-CWNB3:1:1113:9743:18027	MN503549.1	99.531	426	2	0	1	426	255	680	0	776	Bacteria_NA_NA_NA_NA_NA_uncultured bacterium		PVIL-merged-M01780:105:000000000-CWNB3:1:1102:12546:4753	KF003161.1	100	433	0	0	1	433	330	762	0	800	Bacteria_NA_NA_NA_NA_NA_uncultured bacterium
NWSE-merged-M01780:105:000000000-CWNB3:1:1116:26772:16236	MN503549.1	99.296	426	3	0	1	426	255	680	0	771	Bacteria_NA_NA_NA_NA_NA_uncultured bacterium		PVIL-merged-M01780:105:000000000-CWNB3:1:1106:17026:21547	LT800236.1	94.279	402	23	0	1	402	199	600	3.78e-172	616	Bacteria_NA_NA_NA_NA_NA_uncultured bacterium
NWSE-merged-M01780:105:000000000-CWNB3:1:1102:16521:8639	LK025655.2	99.751	402	1	0	1	402	341	742	0	737	Bacteria_NA_NA_NA_NA_NA_uncultured bacterium		PVIL-merged-M01780:105:000000000-CWNB3:1:2104:12353:20113	MG804606.1	95.545	404	14	4	1	402	20	421	1.74e-180	643	Bacteria_NA_NA_NA_NA_NA_uncultured bacterium
NWSE-merged-M01780:105:000000000-CWNB3:1:1106:26372:14289	AB630573.1	89.901	406	37	4	1	404	311	714	3.07e-143	520	Bacteria_NA_NA_NA_NA_NA_uncultured bacterium		PVIL-merged-M01780:105:000000000-CWNB3:1:2105:21484:11661	JQ382228.2	97.059	408	12	0	1	408	332	739	0	688	Bacteria_NA_NA_NA_NA_NA_uncultured bacterium
NWSE-merged-M01780:105:000000000-CWNB3:1:2112:15062:9852	KF247878.1	97.872	423	8	1	1	422	352	774	0	730	Bacteria_NA_NA_NA_NA_NA_uncultured bacterium		PVIL-merged-M01780:105:000000000-CWNB3:1:1113:4680:6542	KF003161.1	100	427	0	0	1	427	330	756	0	789	Bacteria_NA_NA_NA_NA_NA_uncultured bacterium
NWSE-merged-M01780:105:000000000-CWNB3:1:1105:24476:14730	MG284665.1	96.698	424	14	0	1	424	1	424	0	706	Bacteria_NA_NA_NA_NA_NA_uncultured bacterium		PVIL-merged-M01780:105:000000000-CWNB3:1:1119:14525:15985	JQ381956.2	95.75	400	17	0	1	400	333	732	0	645	Bacteria_NA_NA_NA_NA_NA_uncultured bacterium
NWSE-merged-M01780:105:000000000-CWNB3:1:1115:14649:14243	EF074243.1	99.254	402	3	0	1	402	271	672	0	726	Bacteria_NA_NA_NA_NA_NA_uncultured bacterium		PVIL-merged-M01780:105:000000000-CWNB3:1:1115:7421:3230	FN566989.1	99.502	402	2	0	1	402	299	700	0	732	Bacteria_NA_NA_NA_NA_NA_uncultured bacterium
NWSE-merged-M01780:105:000000000-CWNB3:1:2101:10998:7171	KU382133.1	97.63	422	10	0	1	422	280	701	0	725	Bacteria_NA_NA_NA_NA_NA_uncultured bacterium		PVIL-merged-M01780:105:000000000-CWNB3:1:2104:18035:7031	KJ600948.1	92.04	402	32	0	1	402	297	698	3.86e-157	566	Bacteria_NA_NA_NA_NA_NA_uncultured bacterium
NWSE-merged-M01780:105:000000000-CWNB3:1:2106:7382:14692	KY691774.1	98.511	403	6	0	1	403	18	420	0	712	Bacteria_NA_NA_NA_NA_NA_uncultured bacterium		PVIL-merged-M01780:105:000000000-CWNB3:1:1111:4254:19901	JQ381969.2	95.274	402	19	0	1	402	333	734	8.07e-179	638	Bacteria_NA_NA_NA_NA_NA_uncultured bacterium
NWSE-merged-M01780:105:000000000-CWNB3:1:2111:7125:17059	LN563865.1	99.525	421	2	0	1	421	303	723	0	767	Bacteria_NA_NA_NA_NA_NA_uncultured bacterium		PVIL-merged-M01780:105:000000000-CWNB3:1:1118:27571:17743	JQ382688.2	97.625	421	10	0	1	421	332	752	0	723	Bacteria_NA_NA_NA_NA_NA_uncultured bacterium
NWSE-merged-M01780:105:000000000-CWNB3:1:2115:14962:9214	KY691774.1	98.015	403	8	0	1	403	18	420	0	701	Bacteria_NA_NA_NA_NA_NA_uncultured bacterium		PVIL-merged-M01780:105:000000000-CWNB3:1:1109:17724:17018	JQ382228.2	90.511	411	39	0	1	411	332	742	1.86e-150	544	Bacteria_NA_NA_NA_NA_NA_uncultured bacterium
NWSE-merged-M01780:105:000000000-CWNB3:1:1103:21043:21618	KF494595.1	95.785	427	17	1	1	427	346	771	0	688	Bacteria_NA_NA_NA_NA_NA_uncultured bacterium		PVIL-merged-M01780:105:000000000-CWNB3:1:2103:28933:16435	KF003161.1	99.766	427	1	0	1	427	330	756	0	784	Bacteria_NA_NA_NA_NA_NA_uncultured bacterium
NWSE-merged-M01780:105:000000000-CWNB3:1:1114:25359:16622	LN537526.1	94.626	428	21	2	1	427	1	427	0	662	Bacteria_NA_NA_NA_NA_NA_uncultured bacterium		PVIL-merged-M01780:105:000000000-CWNB3:1:1119:8619:14007	KF598756.1	100	402	0	0	1	402	313	714	0	743	Bacteria_NA_NA_NA_NA_NA_uncultured bacterium
NWSE-merged-M01780:105:000000000-CWNB3:1:1115:5732:8678	KU382133.1	99.052	422	4	0	1	422	280	701	0	758	Bacteria_NA_NA_NA_NA_NA_uncultured bacterium		PVIL-merged-M01780:105:000000000-CWNB3:1:2117:8791:7867	GQ302935.1	97.512	402	10	0	1	402	332	733	0	688	Bacteria_NA_NA_NA_NA_NA_uncultured bacterium
NWSE-merged-M01780:105:000000000-CWNB3:1:1110:9581:22847	KY691774.1	99.256	403	3	0	1	403	18	420	0	728	Bacteria_NA_NA_NA_NA_NA_uncultured bacterium		PVIL-merged-M01780:105:000000000-CWNB3:1:2111:23409:5953	KF598756.1	97.512	402	10	0	1	402	313	714	0	688	Bacteria_NA_NA_NA_NA_NA_uncultured bacterium
NWSE-merged-M01780:105:000000000-CWNB3:1:2103:8644:6473	KM185152.1	99.005	402	4	0	1	402	18	419	0	721	Bacteria_NA_NA_NA_NA_NA_uncultured bacterium		PVIL-merged-M01780:105:000000000-CWNB3:1:1116:25541:16197	KF003161.1	100	427	0	0	1	427	330	756	0	789	Bacteria_NA_NA_NA_NA_NA_uncultured bacterium
NWSE-merged-M01780:105:000000000-CWNB3:1:1102:16099:8654	KF247878.1	97.872	423	8	1	1	422	352	774	0	730	Bacteria_NA_NA_NA_NA_NA_uncultured bacterium		PVIL-merged-M01780:105:000000000-CWNB3:1:1119:7099:14245	DQ068921.1	99.502	402	2	0	1	402	336	737	0	732	Bacteria_NA_NA_NA_NA_NA_uncultured bacterium
NWSE-merged-M01780:105:000000000-CWNB3:1:1106:17698:10728	LR638932.1	96.03	403	16	0	1	403	334	736	0	656	Bacteria_NA_NA_NA_NA_NA_uncultured bacterium		PVIL-merged-M01780:105:000000000-CWNB3:1:1111:29477:10969	HM010898.1	81.481	270	50	0	150	419	443	712	1.01e-53	222	Bacteria_NA_NA_NA_NA_NA_uncultured bacterium
NWSE-merged-M01780:105:000000000-CWNB3:1:2103:26458:11368	LN519773.1	85.856	403	55	2	1	402	1	402	1.9e-115	427	Bacteria_NA_NA_NA_NA_NA_uncultured bacterium		PVIL-merged-M01780:105:000000000-CWNB3:1:1118:21566:6452	JQ382228.2	92.289	402	31	0	1	402	332	733	8.75e-159	571	Bacteria_NA_NA_NA_NA_NA_uncultured bacterium
NWSE-merged-M01780:105:000000000-CWNB3:1:2114:3613:14190	KY691774.1	90.206	388	33	5	15	399	32	417	1.11e-137	501	Bacteria_NA_NA_NA_NA_NA_uncultured bacterium		PVIL-merged-M01780:105:000000000-CWNB3:1:1119:20982:10857	MT534083.1	100	402	0	0	1	402	271	672	0	743	Bacteria_Proteobacteria_Alphaproteobacteria_Rhizobiales_Bradyrhizobiaceae_Bradyrhizobium_Bradyrhizobium valentinum
NWSE-merged-M01780:105:000000000-CWNB3:1:2116:16171:23964	MH525291.1	98.829	427	5	0	1	427	1	427	0	761	Bacteria_NA_NA_NA_NA_NA_uncultured bacterium		PVIL-merged-M01780:105:000000000-CWNB3:1:1102:19469:8302	MT534083.1	100	402	0	0	1	402	271	672	0	743	Bacteria_Proteobacteria_Alphaproteobacteria_Rhizobiales_Bradyrhizobiaceae_Bradyrhizobium_Bradyrhizobium valentinum
NWSE-merged-M01780:105:000000000-CWNB3:1:2118:22832:4338	LR638932.1	99.504	403	2	0	1	403	334	736	0	734	Bacteria_NA_NA_NA_NA_NA_uncultured bacterium		PVIL-merged-M01780:105:000000000-CWNB3:1:1110:14438:5860	MT534083.1	100	402	0	0	1	402	271	672	0	743	Bacteria_Proteobacteria_Alphaproteobacteria_Rhizobiales_Bradyrhizobiaceae_Bradyrhizobium_Bradyrhizobium valentinum
NWSE-merged-M01780:105:000000000-CWNB3:1:1110:24763:7775	KF598756.1	95.522	402	18	0	1	402	313	714	1.74e-180	643	Bacteria_NA_NA_NA_NA_NA_uncultured bacterium		PVIL-merged-M01780:105:000000000-CWNB3:1:2114:12344:11169	MT534083.1	100	402	0	0	1	402	271	672	0	743	Bacteria_Proteobacteria_Alphaproteobacteria_Rhizobiales_Bradyrhizobiaceae_Bradyrhizobium_Bradyrhizobium valentinum
NWSE-merged-M01780:105:000000000-CWNB3:1:2105:24606:14874	MG101063.1	98.01	402	8	0	1	402	17	418	0	701	Bacteria_NA_NA_NA_NA_NA_uncultured bacterium		PVIL-merged-M01780:105:000000000-CWNB3:1:2108:15955:12995	MT534083.1	100	402	0	0	1	402	271	672	0	743	Bacteria_Proteobacteria_Alphaproteobacteria_Rhizobiales_Bradyrhizobiaceae_Bradyrhizobium_Bradyrhizobium valentinum
NWSE-merged-M01780:105:000000000-CWNB3:1:2117:20792:23070	KM185152.1	99.005	402	4	0	1	402	18	419	0	721	Bacteria_NA_NA_NA_NA_NA_uncultured bacterium		PVIL-merged-M01780:105:000000000-CWNB3:1:2116:7472:4748	MT534083.1	100	402	0	0	1	402	271	672	0	743	Bacteria_Proteobacteria_Alphaproteobacteria_Rhizobiales_Bradyrhizobiaceae_Bradyrhizobium_Bradyrhizobium valentinum
NWSE-merged-M01780:105:000000000-CWNB3:1:1114:26128:10413	MG101063.1	99.751	402	1	0	1	402	17	418	0	737	Bacteria_NA_NA_NA_NA_NA_uncultured bacterium		PVIL-merged-M01780:105:000000000-CWNB3:1:2105:19387:10255	MT534083.1	100	402	0	0	1	402	271	672	0	743	Bacteria_Proteobacteria_Alphaproteobacteria_Rhizobiales_Bradyrhizobiaceae_Bradyrhizobium_Bradyrhizobium valentinum
NWSE-merged-M01780:105:000000000-CWNB3:1:1118:16870:12587	JQ460282.1	99.763	422	1	0	1	422	359	780	0	774	Bacteria_NA_NA_NA_NA_NA_uncultured bacterium		PVIL-merged-M01780:105:000000000-CWNB3:1:2106:18737:23248	MT534083.1	100	402	0	0	1	402	271	672	0	743	Bacteria_Proteobacteria_Alphaproteobacteria_Rhizobiales_Bradyrhizobiaceae_Bradyrhizobium_Bradyrhizobium valentinum
NWSE-merged-M01780:105:000000000-CWNB3:1:2107:16675:6820	KF247878.1	97.4	423	10	1	1	422	352	774	0	719	Bacteria_NA_NA_NA_NA_NA_uncultured bacterium		PVIL-merged-M01780:105:000000000-CWNB3:1:1101:10517:18564	MT534083.1	100	402	0	0	1	402	271	672	0	743	Bacteria_Proteobacteria_Alphaproteobacteria_Rhizobiales_Bradyrhizobiaceae_Bradyrhizobium_Bradyrhizobium valentinum
NWSE-merged-M01780:105:000000000-CWNB3:1:2113:26467:15966	KY691774.1	99.007	403	4	0	1	403	18	420	0	723	Bacteria_NA_NA_NA_NA_NA_uncultured bacterium		PVIL-merged-M01780:105:000000000-CWNB3:1:2108:15886:21508	MT534083.1	100	402	0	0	1	402	271	672	0	743	Bacteria_Proteobacteria_Alphaproteobacteria_Rhizobiales_Bradyrhizobiaceae_Bradyrhizobium_Bradyrhizobium valentinum
NWSE-merged-M01780:105:000000000-CWNB3:1:1105:16671:11769	AB658245.1	99.052	422	4	0	1	422	326	747	0	758	Bacteria_NA_NA_NA_NA_NA_uncultured bacterium		PVIL-merged-M01780:105:000000000-CWNB3:1:2103:17830:18556	MT534083.1	99.005	402	4	0	1	402	271	672	0	721	Bacteria_Proteobacteria_Alphaproteobacteria_Rhizobiales_Bradyrhizobiaceae_Bradyrhizobium_Bradyrhizobium valentinum
NWSE-merged-M01780:105:000000000-CWNB3:1:1113:21163:18870	LR638932.1	99.252	401	3	0	3	403	336	736	0	725	Bacteria_NA_NA_NA_NA_NA_uncultured bacterium		PVIL-merged-M01780:105:000000000-CWNB3:1:1118:6197:4424	MT534083.1	100	402	0	0	1	402	271	672	0	743	Bacteria_Proteobacteria_Alphaproteobacteria_Rhizobiales_Bradyrhizobiaceae_Bradyrhizobium_Bradyrhizobium valentinum
NWSE-merged-M01780:105:000000000-CWNB3:1:1114:24778:8209	JQ381957.2	98.01	402	8	0	1	402	333	734	0	699	Bacteria_NA_NA_NA_NA_NA_uncultured bacterium		PVIL-merged-M01780:105:000000000-CWNB3:1:2115:18321:24053	MT534083.1	100	402	0	0	1	402	271	672	0	743	Bacteria_Proteobacteria_Alphaproteobacteria_Rhizobiales_Bradyrhizobiaceae_Bradyrhizobium_Bradyrhizobium valentinum
NWSE-merged-M01780:105:000000000-CWNB3:1:1117:9985:21587	MN503549.1	98.357	426	7	0	1	426	255	680	0	749	Bacteria_NA_NA_NA_NA_NA_uncultured bacterium		PVIL-merged-M01780:105:000000000-CWNB3:1:1117:19226:7458	MT534083.1	100	402	0	0	1	402	271	672	0	743	Bacteria_Proteobacteria_Alphaproteobacteria_Rhizobiales_Bradyrhizobiaceae_Bradyrhizobium_Bradyrhizobium valentinum
NWSE-merged-M01780:105:000000000-CWNB3:1:2111:23859:15583	AB630573.1	89.655	406	38	4	1	404	311	714	1.43e-141	514	Bacteria_NA_NA_NA_NA_NA_uncultured bacterium		PVIL-merged-M01780:105:000000000-CWNB3:1:1102:24586:7611	MK239931.1	99.502	402	2	0	1	402	257	658	0	732	Bacteria_Proteobacteria_Alphaproteobacteria_Rickettsiales_Anaplasmataceae_Anaplasma_Anaplasma phagocytophilum
NWSE-merged-M01780:105:000000000-CWNB3:1:2112:25951:11594	KU382133.1	98.091	419	8	0	4	422	283	701	0	730	Bacteria_NA_NA_NA_NA_NA_uncultured bacterium		PVIL-merged-M01780:105:000000000-CWNB3:1:1108:21373:20198	MK239931.1	99.751	402	1	0	1	402	257	658	0	737	Bacteria_Proteobacteria_Alphaproteobacteria_Rickettsiales_Anaplasmataceae_Anaplasma_Anaplasma phagocytophilum
NWSE-merged-M01780:105:000000000-CWNB3:1:1111:7859:12010	MN503549.1	98.826	426	5	0	1	426	255	680	0	760	Bacteria_NA_NA_NA_NA_NA_uncultured bacterium		PVIL-merged-M01780:105:000000000-CWNB3:1:1108:15439:11313	MK239931.1	98.01	402	8	0	1	402	257	658	0	699	Bacteria_Proteobacteria_Alphaproteobacteria_Rickettsiales_Anaplasmataceae_Anaplasma_Anaplasma phagocytophilum
NWSE-merged-M01780:105:000000000-CWNB3:1:2105:19740:6508	LR643369.1	100	422	0	0	1	422	332	753	0	780	Bacteria_NA_NA_NA_NA_NA_uncultured bacterium		PVIL-merged-M01780:105:000000000-CWNB3:1:1114:20645:14009	MK239931.1	100	402	0	0	1	402	257	658	0	743	Bacteria_Proteobacteria_Alphaproteobacteria_Rickettsiales_Anaplasmataceae_Anaplasma_Anaplasma phagocytophilum
NWSE-merged-M01780:105:000000000-CWNB3:1:2103:16718:22853	MH525291.1	98.361	427	7	0	1	427	1	427	0	752	Bacteria_NA_NA_NA_NA_NA_uncultured bacterium		PVIL-merged-M01780:105:000000000-CWNB3:1:1114:25291:11796	MK239931.1	100	402	0	0	1	402	257	658	0	743	Bacteria_Proteobacteria_Alphaproteobacteria_Rickettsiales_Anaplasmataceae_Anaplasma_Anaplasma phagocytophilum
NWSE-merged-M01780:105:000000000-CWNB3:1:2103:16913:12586	MN503549.1	99.296	426	3	0	1	426	255	680	0	771	Bacteria_NA_NA_NA_NA_NA_uncultured bacterium		PVIL-merged-M01780:105:000000000-CWNB3:1:1118:19758:14346	MK239931.1	100	402	0	0	1	402	257	658	0	743	Bacteria_Proteobacteria_Alphaproteobacteria_Rickettsiales_Anaplasmataceae_Anaplasma_Anaplasma phagocytophilum
NWSE-merged-M01780:105:000000000-CWNB3:1:1101:22939:5826	LC352103.1	99.297	427	3	0	1	427	1	427	0	773	Bacteria_NA_NA_NA_NA_NA_uncultured bacterium		PVIL-merged-M01780:105:000000000-CWNB3:1:1118:23310:10006	MK239931.1	100	402	0	0	1	402	257	658	0	743	Bacteria_Proteobacteria_Alphaproteobacteria_Rickettsiales_Anaplasmataceae_Anaplasma_Anaplasma phagocytophilum
NWSE-merged-M01780:105:000000000-CWNB3:1:1118:24381:21415	AB658245.1	96.919	422	13	0	1	422	326	747	0	708	Bacteria_NA_NA_NA_NA_NA_uncultured bacterium		PVIL-merged-M01780:105:000000000-CWNB3:1:2102:13168:23220	MK239931.1	100	402	0	0	1	402	257	658	0	743	Bacteria_Proteobacteria_Alphaproteobacteria_Rickettsiales_Anaplasmataceae_Anaplasma_Anaplasma phagocytophilum
NWSE-merged-M01780:105:000000000-CWNB3:1:2110:21402:6683	KF494595.1	95.785	427	17	1	1	427	346	771	0	688	Bacteria_NA_NA_NA_NA_NA_uncultured bacterium		PVIL-merged-M01780:105:000000000-CWNB3:1:2103:15426:8332	AY969012.1	95.771	402	17	0	1	402	311	712	0	649	Bacteria_Proteobacteria_Alphaproteobacteria_Rickettsiales_Anaplasmataceae_Anaplasma_Anaplasma phagocytophilum
NWSE-merged-M01780:105:000000000-CWNB3:1:1113:22672:18399	KF247878.1	97.4	423	10	1	1	422	352	774	0	719	Bacteria_NA_NA_NA_NA_NA_uncultured bacterium		PVIL-merged-M01780:105:000000000-CWNB3:1:2105:13515:7774	MK239931.1	100	402	0	0	1	402	257	658	0	743	Bacteria_Proteobacteria_Alphaproteobacteria_Rickettsiales_Anaplasmataceae_Anaplasma_Anaplasma phagocytophilum
NWSE-merged-M01780:105:000000000-CWNB3:1:1114:11687:3861	LR638932.1	99.504	403	2	0	1	403	334	736	0	734	Bacteria_NA_NA_NA_NA_NA_uncultured bacterium		PVIL-merged-M01780:105:000000000-CWNB3:1:2106:20796:22372	MK239931.1	100	402	0	0	1	402	257	658	0	743	Bacteria_Proteobacteria_Alphaproteobacteria_Rickettsiales_Anaplasmataceae_Anaplasma_Anaplasma phagocytophilum
NWSE-merged-M01780:105:000000000-CWNB3:1:2109:18626:15294	KM185152.1	98.756	402	5	0	1	402	18	419	0	715	Bacteria_NA_NA_NA_NA_NA_uncultured bacterium		PVIL-merged-M01780:105:000000000-CWNB3:1:2108:10843:7997	MK239931.1	100	402	0	0	1	402	257	658	0	743	Bacteria_Proteobacteria_Alphaproteobacteria_Rickettsiales_Anaplasmataceae_Anaplasma_Anaplasma phagocytophilum
NWSE-merged-M01780:105:000000000-CWNB3:1:1101:17450:10981	MN503549.1	99.531	426	2	0	1	426	255	680	0	776	Bacteria_NA_NA_NA_NA_NA_uncultured bacterium		PVIL-merged-M01780:105:000000000-CWNB3:1:2111:16148:16265	MK239931.1	100	402	0	0	1	402	257	658	0	743	Bacteria_Proteobacteria_Alphaproteobacteria_Rickettsiales_Anaplasmataceae_Anaplasma_Anaplasma phagocytophilum
NWSE-merged-M01780:105:000000000-CWNB3:1:1109:8700:13374	KU382133.1	99.052	422	4	0	1	422	280	701	0	758	Bacteria_NA_NA_NA_NA_NA_uncultured bacterium		PVIL-merged-M01780:105:000000000-CWNB3:1:2112:20437:3820	MK239931.1	99.751	402	1	0	1	402	257	658	0	737	Bacteria_Proteobacteria_Alphaproteobacteria_Rickettsiales_Anaplasmataceae_Anaplasma_Anaplasma phagocytophilum
NWSE-merged-M01780:105:000000000-CWNB3:1:1110:13035:18933	AB658245.1	98.815	422	5	0	1	422	326	747	0	752	Bacteria_NA_NA_NA_NA_NA_uncultured bacterium		PVIL-merged-M01780:105:000000000-CWNB3:1:2112:12071:16901	MK239931.1	99.751	402	1	0	1	402	257	658	0	737	Bacteria_Proteobacteria_Alphaproteobacteria_Rickettsiales_Anaplasmataceae_Anaplasma_Anaplasma phagocytophilum
NWSE-merged-M01780:105:000000000-CWNB3:1:1117:25865:21608	LN715676.1	92.786	402	29	0	1	402	299	700	3.84e-162	582	Bacteria_NA_NA_NA_NA_NA_uncultured bacterium		PVIL-merged-M01780:105:000000000-CWNB3:1:2113:6378:4757	MK239931.1	99.254	402	3	0	1	402	257	658	0	726	Bacteria_Proteobacteria_Alphaproteobacteria_Rickettsiales_Anaplasmataceae_Anaplasma_Anaplasma phagocytophilum
NWSE-merged-M01780:105:000000000-CWNB3:1:1119:23759:3812	JX095694.1	98.756	402	5	0	1	402	272	673	0	715	Bacteria_NA_NA_NA_NA_NA_uncultured bacterium		PVIL-merged-M01780:105:000000000-CWNB3:1:2114:18710:5854	MK239931.1	100	402	0	0	1	402	257	658	0	743	Bacteria_Proteobacteria_Alphaproteobacteria_Rickettsiales_Anaplasmataceae_Anaplasma_Anaplasma phagocytophilum
NWSE-merged-M01780:105:000000000-CWNB3:1:2101:11403:14736	JQ381969.2	98.01	402	8	0	1	402	333	734	0	699	Bacteria_NA_NA_NA_NA_NA_uncultured bacterium		PVIL-merged-M01780:105:000000000-CWNB3:1:2115:17411:23595	MK239931.1	98.507	402	6	0	1	402	257	658	0	710	Bacteria_Proteobacteria_Alphaproteobacteria_Rickettsiales_Anaplasmataceae_Anaplasma_Anaplasma phagocytophilum
NWSE-merged-M01780:105:000000000-CWNB3:1:2117:16306:14027	LK025655.2	99.502	402	2	0	1	402	341	742	0	732	Bacteria_NA_NA_NA_NA_NA_uncultured bacterium		PVIL-merged-M01780:105:000000000-CWNB3:1:2119:23624:22291	MK239931.1	100	402	0	0	1	402	257	658	0	743	Bacteria_Proteobacteria_Alphaproteobacteria_Rickettsiales_Anaplasmataceae_Anaplasma_Anaplasma phagocytophilum
NWSE-merged-M01780:105:000000000-CWNB3:1:1104:8215:23614	KF598756.1	98.246	399	7	0	1	399	313	711	0	701	Bacteria_NA_NA_NA_NA_NA_uncultured bacterium		PVIL-merged-M01780:105:000000000-CWNB3:1:1101:22268:7471	MK239931.1	100	402	0	0	1	402	257	658	0	743	Bacteria_Proteobacteria_Alphaproteobacteria_Rickettsiales_Anaplasmataceae_Anaplasma_Anaplasma phagocytophilum
NWSE-merged-M01780:105:000000000-CWNB3:1:1102:10019:12131	MH525291.1	98.829	427	5	0	1	427	1	427	0	761	Bacteria_NA_NA_NA_NA_NA_uncultured bacterium		PVIL-merged-M01780:105:000000000-CWNB3:1:1107:14949:13378	MN227385.1	98.537	410	6	0	1	410	64	473	0	725	Bacteria_Proteobacteria_Alphaproteobacteria_Rickettsiales_Anaplasmataceae_Anaplasma_Anaplasma phagocytophilum
NWSE-merged-M01780:105:000000000-CWNB3:1:2101:12554:9056	EU644339.1	99.526	422	2	0	1	422	352	773	0	769	Bacteria_NA_NA_NA_NA_NA_uncultured bacterium		PVIL-merged-M01780:105:000000000-CWNB3:1:1106:6353:9934	MN227385.1	96.517	402	14	0	1	402	64	465	0	665	Bacteria_Proteobacteria_Alphaproteobacteria_Rickettsiales_Anaplasmataceae_Anaplasma_Anaplasma phagocytophilum
NWSE-merged-M01780:105:000000000-CWNB3:1:2108:13174:6553	KF598756.1	98.759	403	3	2	1	402	313	714	0	715	Bacteria_NA_NA_NA_NA_NA_uncultured bacterium		PVIL-merged-M01780:105:000000000-CWNB3:1:1108:17611:17482	MK239931.1	100	402	0	0	1	402	257	658	0	743	Bacteria_Proteobacteria_Alphaproteobacteria_Rickettsiales_Anaplasmataceae_Anaplasma_Anaplasma phagocytophilum
NWSE-merged-M01780:105:000000000-CWNB3:1:1105:19356:13524	LR643369.1	100	422	0	0	1	422	332	753	0	780	Bacteria_NA_NA_NA_NA_NA_uncultured bacterium		PVIL-merged-M01780:105:000000000-CWNB3:1:1105:18503:18996	MK239931.1	100	402	0	0	1	402	257	658	0	743	Bacteria_Proteobacteria_Alphaproteobacteria_Rickettsiales_Anaplasmataceae_Anaplasma_Anaplasma phagocytophilum
NWSE-merged-M01780:105:000000000-CWNB3:1:1113:7729:21949	KY691774.1	99.256	403	3	0	1	403	18	420	0	728	Bacteria_NA_NA_NA_NA_NA_uncultured bacterium		PVIL-merged-M01780:105:000000000-CWNB3:1:1112:27645:10218	MK239931.1	99.254	402	3	0	1	402	257	658	0	726	Bacteria_Proteobacteria_Alphaproteobacteria_Rickettsiales_Anaplasmataceae_Anaplasma_Anaplasma phagocytophilum
NWSE-merged-M01780:105:000000000-CWNB3:1:1115:23982:19319	KU382131.1	96.782	404	12	1	1	403	277	680	0	673	Bacteria_NA_NA_NA_NA_NA_uncultured bacterium		PVIL-merged-M01780:105:000000000-CWNB3:1:1114:14689:17582	MK239931.1	99.502	402	2	0	1	402	257	658	0	732	Bacteria_Proteobacteria_Alphaproteobacteria_Rickettsiales_Anaplasmataceae_Anaplasma_Anaplasma phagocytophilum
NWSE-merged-M01780:105:000000000-CWNB3:1:1117:15779:14071	JQ381956.2	94.697	396	21	0	1	396	333	728	3.89e-172	616	Bacteria_NA_NA_NA_NA_NA_uncultured bacterium		PVIL-merged-M01780:105:000000000-CWNB3:1:2102:23601:14847	MK239931.1	99.751	402	1	0	1	402	257	658	0	737	Bacteria_Proteobacteria_Alphaproteobacteria_Rickettsiales_Anaplasmataceae_Anaplasma_Anaplasma phagocytophilum
NWSE-merged-M01780:105:000000000-CWNB3:1:2101:13458:15454	MG804606.1	95.792	404	13	4	1	402	20	421	0	649	Bacteria_NA_NA_NA_NA_NA_uncultured bacterium		PVIL-merged-M01780:105:000000000-CWNB3:1:2103:14140:22639	MK239931.1	99.757	411	1	0	1	411	257	667	0	754	Bacteria_Proteobacteria_Alphaproteobacteria_Rickettsiales_Anaplasmataceae_Anaplasma_Anaplasma phagocytophilum
NWSE-merged-M01780:105:000000000-CWNB3:1:1115:13598:12439	MG284665.1	96.698	424	14	0	1	424	1	424	0	706	Bacteria_NA_NA_NA_NA_NA_uncultured bacterium		PVIL-merged-M01780:105:000000000-CWNB3:1:2118:5692:5553	MK239931.1	99.751	402	1	0	1	402	257	658	0	737	Bacteria_Proteobacteria_Alphaproteobacteria_Rickettsiales_Anaplasmataceae_Anaplasma_Anaplasma phagocytophilum
NWSE-merged-M01780:105:000000000-CWNB3:1:2107:7210:10554	KM185152.1	99.254	402	3	0	1	402	18	419	0	726	Bacteria_NA_NA_NA_NA_NA_uncultured bacterium		PVIL-merged-M01780:105:000000000-CWNB3:1:1103:11956:24535	MK239931.1	100	402	0	0	1	402	257	658	0	743	Bacteria_Proteobacteria_Alphaproteobacteria_Rickettsiales_Anaplasmataceae_Anaplasma_Anaplasma phagocytophilum
NWSE-merged-M01780:105:000000000-CWNB3:1:2109:23202:15022	MN503549.1	98.826	426	5	0	1	426	255	680	0	760	Bacteria_NA_NA_NA_NA_NA_uncultured bacterium		PVIL-merged-M01780:105:000000000-CWNB3:1:1111:15154:5954	MK239931.1	99.254	402	3	0	1	402	257	658	0	726	Bacteria_Proteobacteria_Alphaproteobacteria_Rickettsiales_Anaplasmataceae_Anaplasma_Anaplasma phagocytophilum
NWSE-merged-M01780:105:000000000-CWNB3:1:2115:15161:13150	KF247878.1	97.872	423	8	1	1	422	352	774	0	730	Bacteria_NA_NA_NA_NA_NA_uncultured bacterium		PVIL-merged-M01780:105:000000000-CWNB3:1:1112:3533:12033	MK239931.1	98.254	401	7	0	1	401	257	657	0	702	Bacteria_Proteobacteria_Alphaproteobacteria_Rickettsiales_Anaplasmataceae_Anaplasma_Anaplasma phagocytophilum
NWSE-merged-M01780:105:000000000-CWNB3:1:1104:18913:22389	LR643369.1	100	422	0	0	1	422	332	753	0	780	Bacteria_NA_NA_NA_NA_NA_uncultured bacterium		PVIL-merged-M01780:105:000000000-CWNB3:1:1114:17660:1847	MK239931.1	99.502	402	2	0	1	402	257	658	0	732	Bacteria_Proteobacteria_Alphaproteobacteria_Rickettsiales_Anaplasmataceae_Anaplasma_Anaplasma phagocytophilum
NWSE-merged-M01780:105:000000000-CWNB3:1:1108:9026:15896	AY600928.1	96.667	420	14	0	1	420	18	437	0	699	Bacteria_NA_NA_NA_NA_NA_uncultured bacterium		PVIL-merged-M01780:105:000000000-CWNB3:1:1115:10587:9169	MK239931.1	100	402	0	0	1	402	257	658	0	743	Bacteria_Proteobacteria_Alphaproteobacteria_Rickettsiales_Anaplasmataceae_Anaplasma_Anaplasma phagocytophilum
NWSE-merged-M01780:105:000000000-CWNB3:1:1115:15506:3872	JF341540.1	94.313	422	24	0	1	422	334	755	0	647	Bacteria_NA_NA_NA_NA_NA_uncultured bacterium		PVIL-merged-M01780:105:000000000-CWNB3:1:1115:9718:17343	MK239931.1	100	402	0	0	1	402	257	658	0	743	Bacteria_Proteobacteria_Alphaproteobacteria_Rickettsiales_Anaplasmataceae_Anaplasma_Anaplasma phagocytophilum
NWSE-merged-M01780:105:000000000-CWNB3:1:1116:16846:16273	JQ382688.2	93.349	421	28	0	1	421	332	752	2.38e-174	623	Bacteria_NA_NA_NA_NA_NA_uncultured bacterium		PVIL-merged-M01780:105:000000000-CWNB3:1:2102:19648:18557	MK239931.1	98.756	402	5	0	1	402	257	658	0	715	Bacteria_Proteobacteria_Alphaproteobacteria_Rickettsiales_Anaplasmataceae_Anaplasma_Anaplasma phagocytophilum
NWSE-merged-M01780:105:000000000-CWNB3:1:2103:12827:6426	MH525291.1	97.892	427	9	0	1	427	1	427	0	739	Bacteria_NA_NA_NA_NA_NA_uncultured bacterium		PVIL-merged-M01780:105:000000000-CWNB3:1:2103:16460:12407	MK239931.1	99.751	402	1	0	1	402	257	658	0	737	Bacteria_Proteobacteria_Alphaproteobacteria_Rickettsiales_Anaplasmataceae_Anaplasma_Anaplasma phagocytophilum
NWSE-merged-M01780:105:000000000-CWNB3:1:1108:2659:10971	EU644339.1	99.289	422	3	0	1	422	352	773	0	763	Bacteria_NA_NA_NA_NA_NA_uncultured bacterium		PVIL-merged-M01780:105:000000000-CWNB3:1:2105:11974:11789	MK239931.1	99.751	402	1	0	1	402	257	658	0	737	Bacteria_Proteobacteria_Alphaproteobacteria_Rickettsiales_Anaplasmataceae_Anaplasma_Anaplasma phagocytophilum
NWSE-merged-M01780:105:000000000-CWNB3:1:1114:3202:19343	EF074243.1	98.756	402	5	0	1	402	271	672	0	717	Bacteria_NA_NA_NA_NA_NA_uncultured bacterium		PVIL-merged-M01780:105:000000000-CWNB3:1:2104:15323:14141	MK239931.1	99.751	402	1	0	1	402	257	658	0	737	Bacteria_Proteobacteria_Alphaproteobacteria_Rickettsiales_Anaplasmataceae_Anaplasma_Anaplasma phagocytophilum
NWSE-merged-M01780:105:000000000-CWNB3:1:1117:24704:11856	KM185152.1	99.254	402	3	0	1	402	18	419	0	726	Bacteria_NA_NA_NA_NA_NA_uncultured bacterium		PVIL-merged-M01780:105:000000000-CWNB3:1:2112:6199:16018	MK239931.1	100	402	0	0	1	402	257	658	0	743	Bacteria_Proteobacteria_Alphaproteobacteria_Rickettsiales_Anaplasmataceae_Anaplasma_Anaplasma phagocytophilum
NWSE-merged-M01780:105:000000000-CWNB3:1:1104:16168:13194	KM185152.1	99.005	402	4	0	1	402	18	419	0	721	Bacteria_NA_NA_NA_NA_NA_uncultured bacterium		PVIL-merged-M01780:105:000000000-CWNB3:1:2115:5399:10834	MK239931.1	99.254	402	3	0	1	402	257	658	0	726	Bacteria_Proteobacteria_Alphaproteobacteria_Rickettsiales_Anaplasmataceae_Anaplasma_Anaplasma phagocytophilum
NWSE-merged-M01780:105:000000000-CWNB3:1:1105:16271:9765	AY600928.1	95.862	290	12	0	112	401	148	437	3.11e-128	470	Bacteria_NA_NA_NA_NA_NA_uncultured bacterium		PVIL-merged-M01780:105:000000000-CWNB3:1:2116:20653:8103	MK239931.1	99.502	402	2	0	1	402	257	658	0	732	Bacteria_Proteobacteria_Alphaproteobacteria_Rickettsiales_Anaplasmataceae_Anaplasma_Anaplasma phagocytophilum
NWSE-merged-M01780:105:000000000-CWNB3:1:2119:15545:3963	KY691318.1	99.254	402	3	0	1	402	18	419	0	726	Bacteria_NA_NA_NA_NA_NA_uncultured bacterium		PVIL-merged-M01780:105:000000000-CWNB3:1:1104:8500:8679	MN227385.1	96.517	402	14	0	1	402	64	465	0	665	Bacteria_Proteobacteria_Alphaproteobacteria_Rickettsiales_Anaplasmataceae_Anaplasma_Anaplasma phagocytophilum
NWSE-merged-M01780:105:000000000-CWNB3:1:1114:22668:22010	MG284665.1	96.698	424	14	0	1	424	1	424	0	706	Bacteria_NA_NA_NA_NA_NA_uncultured bacterium		PVIL-merged-M01780:105:000000000-CWNB3:1:1106:25534:20638	MK239931.1	100	402	0	0	1	402	257	658	0	743	Bacteria_Proteobacteria_Alphaproteobacteria_Rickettsiales_Anaplasmataceae_Anaplasma_Anaplasma phagocytophilum
NWSE-merged-M01780:105:000000000-CWNB3:1:1116:26069:6414	AB630573.1	89.901	406	37	4	1	404	311	714	3.07e-143	520	Bacteria_NA_NA_NA_NA_NA_uncultured bacterium		PVIL-merged-M01780:105:000000000-CWNB3:1:1114:14747:14695	MK239931.1	99.751	402	1	0	1	402	257	658	0	737	Bacteria_Proteobacteria_Alphaproteobacteria_Rickettsiales_Anaplasmataceae_Anaplasma_Anaplasma phagocytophilum
NWSE-merged-M01780:105:000000000-CWNB3:1:2110:11132:22174	AB821167.1	99.75	400	1	0	3	402	328	727	0	734	Bacteria_NA_NA_NA_NA_NA_uncultured bacterium		PVIL-merged-M01780:105:000000000-CWNB3:1:1112:11878:8102	MN227385.1	97.264	402	11	0	1	402	64	465	0	682	Bacteria_Proteobacteria_Alphaproteobacteria_Rickettsiales_Anaplasmataceae_Anaplasma_Anaplasma phagocytophilum
NWSE-merged-M01780:105:000000000-CWNB3:1:2115:10892:8384	LN537526.1	94.626	428	21	2	1	427	1	427	0	662	Bacteria_NA_NA_NA_NA_NA_uncultured bacterium		PVIL-merged-M01780:105:000000000-CWNB3:1:1117:18533:8665	MK239931.1	100	402	0	0	1	402	257	658	0	743	Bacteria_Proteobacteria_Alphaproteobacteria_Rickettsiales_Anaplasmataceae_Anaplasma_Anaplasma phagocytophilum
NWSE-merged-M01780:105:000000000-CWNB3:1:2119:10127:11126	AB656108.1	97.19	427	12	0	2	428	341	767	0	723	Bacteria_NA_NA_NA_NA_NA_uncultured bacterium		PVIL-merged-M01780:105:000000000-CWNB3:1:2105:9280:19946	MK239931.1	99.502	402	2	0	1	402	257	658	0	732	Bacteria_Proteobacteria_Alphaproteobacteria_Rickettsiales_Anaplasmataceae_Anaplasma_Anaplasma phagocytophilum
NWSE-merged-M01780:105:000000000-CWNB3:1:2101:18103:18278	JQ382688.2	95	420	19	2	1	419	332	750	0	658	Bacteria_NA_NA_NA_NA_NA_uncultured bacterium		PVIL-merged-M01780:105:000000000-CWNB3:1:2111:6003:9985	MK239931.1	100	402	0	0	1	402	257	658	0	743	Bacteria_Proteobacteria_Alphaproteobacteria_Rickettsiales_Anaplasmataceae_Anaplasma_Anaplasma phagocytophilum
NWSE-merged-M01780:105:000000000-CWNB3:1:1103:22272:14205	MN503549.1	99.531	426	2	0	1	426	255	680	0	776	Bacteria_NA_NA_NA_NA_NA_uncultured bacterium		PVIL-merged-M01780:105:000000000-CWNB3:1:2115:26670:8190	MK239931.1	98.756	402	5	0	1	402	257	658	0	715	Bacteria_Proteobacteria_Alphaproteobacteria_Rickettsiales_Anaplasmataceae_Anaplasma_Anaplasma phagocytophilum
NWSE-merged-M01780:105:000000000-CWNB3:1:1105:3635:18106	KY691774.1	99.007	403	4	0	1	403	18	420	0	723	Bacteria_NA_NA_NA_NA_NA_uncultured bacterium		PVIL-merged-M01780:105:000000000-CWNB3:1:2115:13798:13327	MK239931.1	100	402	0	0	1	402	257	658	0	743	Bacteria_Proteobacteria_Alphaproteobacteria_Rickettsiales_Anaplasmataceae_Anaplasma_Anaplasma phagocytophilum
NWSE-merged-M01780:105:000000000-CWNB3:1:2105:5757:6596	MG101063.1	98.507	402	6	0	1	402	17	418	0	710	Bacteria_NA_NA_NA_NA_NA_uncultured bacterium		PVIL-merged-M01780:105:000000000-CWNB3:1:2118:27967:12926	AY969012.1	98.756	402	5	0	1	402	311	712	0	715	Bacteria_Proteobacteria_Alphaproteobacteria_Rickettsiales_Anaplasmataceae_Anaplasma_Anaplasma phagocytophilum
NWSE-merged-M01780:105:000000000-CWNB3:1:2119:25656:20235	KU382131.1	98.519	405	6	0	1	405	277	681	0	715	Bacteria_NA_NA_NA_NA_NA_uncultured bacterium		PVIL-merged-M01780:105:000000000-CWNB3:1:2116:11687:19391	MK239931.1	100	402	0	0	1	402	257	658	0	743	Bacteria_Proteobacteria_Alphaproteobacteria_Rickettsiales_Anaplasmataceae_Anaplasma_Anaplasma phagocytophilum
NWSE-merged-M01780:105:000000000-CWNB3:1:2103:13713:21389	EF604188.1	99.297	427	3	0	1	427	351	777	0	773	Bacteria_NA_NA_NA_NA_NA_uncultured bacterium		PVIL-merged-M01780:105:000000000-CWNB3:1:2119:8759:4225	MK239931.1	99.005	402	4	0	1	402	257	658	0	721	Bacteria_Proteobacteria_Alphaproteobacteria_Rickettsiales_Anaplasmataceae_Anaplasma_Anaplasma phagocytophilum
NWSE-merged-M01780:105:000000000-CWNB3:1:2103:27280:10565	KF598756.1	96.01	401	16	0	1	401	313	713	0	652	Bacteria_NA_NA_NA_NA_NA_uncultured bacterium		PVIL-merged-M01780:105:000000000-CWNB3:1:1101:10694:13105	MK239931.1	100	402	0	0	1	402	257	658	0	743	Bacteria_Proteobacteria_Alphaproteobacteria_Rickettsiales_Anaplasmataceae_Anaplasma_Anaplasma phagocytophilum
NWSE-merged-M01780:105:000000000-CWNB3:1:2115:19863:19476	LR638932.1	99.752	403	1	0	1	403	334	736	0	739	Bacteria_NA_NA_NA_NA_NA_uncultured bacterium		PVIL-merged-M01780:105:000000000-CWNB3:1:1103:25739:3959	MK239931.1	100	402	0	0	1	402	257	658	0	743	Bacteria_Proteobacteria_Alphaproteobacteria_Rickettsiales_Anaplasmataceae_Anaplasma_Anaplasma phagocytophilum
NWSE-merged-M01780:105:000000000-CWNB3:1:2119:10151:14926	LR643369.1	99.763	422	1	0	1	422	332	753	0	774	Bacteria_NA_NA_NA_NA_NA_uncultured bacterium		PVIL-merged-M01780:105:000000000-CWNB3:1:1107:24797:19254	AY969012.1	96.269	402	15	0	1	402	311	712	0	660	Bacteria_Proteobacteria_Alphaproteobacteria_Rickettsiales_Anaplasmataceae_Anaplasma_Anaplasma phagocytophilum
NWSE-merged-M01780:105:000000000-CWNB3:1:2103:13898:19506	LR643369.1	100	422	0	0	1	422	332	753	0	780	Bacteria_NA_NA_NA_NA_NA_uncultured bacterium		PVIL-merged-M01780:105:000000000-CWNB3:1:1105:11199:13566	MK239931.1	100	402	0	0	1	402	257	658	0	743	Bacteria_Proteobacteria_Alphaproteobacteria_Rickettsiales_Anaplasmataceae_Anaplasma_Anaplasma phagocytophilum
NWSE-merged-M01780:105:000000000-CWNB3:1:1119:12993:6076	LN537526.1	94.626	428	21	2	1	427	1	427	0	662	Bacteria_NA_NA_NA_NA_NA_uncultured bacterium		PVIL-merged-M01780:105:000000000-CWNB3:1:1107:26121:14195	MK239931.1	99.751	402	1	0	1	402	257	658	0	737	Bacteria_Proteobacteria_Alphaproteobacteria_Rickettsiales_Anaplasmataceae_Anaplasma_Anaplasma phagocytophilum
NWSE-merged-M01780:105:000000000-CWNB3:1:2103:13629:17180	MH525291.1	98.829	427	5	0	1	427	1	427	0	761	Bacteria_NA_NA_NA_NA_NA_uncultured bacterium		PVIL-merged-M01780:105:000000000-CWNB3:1:1108:25310:10424	MK239931.1	100	402	0	0	1	402	257	658	0	743	Bacteria_Proteobacteria_Alphaproteobacteria_Rickettsiales_Anaplasmataceae_Anaplasma_Anaplasma phagocytophilum
NWSE-merged-M01780:105:000000000-CWNB3:1:2119:15183:9999	LR638932.1	100	403	0	0	1	403	334	736	0	745	Bacteria_NA_NA_NA_NA_NA_uncultured bacterium		PVIL-merged-M01780:105:000000000-CWNB3:1:1105:10891:22462	MK239931.1	99.751	402	1	0	1	402	257	658	0	737	Bacteria_Proteobacteria_Alphaproteobacteria_Rickettsiales_Anaplasmataceae_Anaplasma_Anaplasma phagocytophilum
NWSE-merged-M01780:105:000000000-CWNB3:1:1112:13183:10231	KF598756.1	99.254	402	3	0	1	402	313	714	0	726	Bacteria_NA_NA_NA_NA_NA_uncultured bacterium		PVIL-merged-M01780:105:000000000-CWNB3:1:1111:9614:19804	MK239931.1	99.751	402	1	0	1	402	257	658	0	737	Bacteria_Proteobacteria_Alphaproteobacteria_Rickettsiales_Anaplasmataceae_Anaplasma_Anaplasma phagocytophilum
NWSE-merged-M01780:105:000000000-CWNB3:1:1104:19109:20088	KU382131.1	99.012	405	4	0	1	405	277	681	0	726	Bacteria_NA_NA_NA_NA_NA_uncultured bacterium		PVIL-merged-M01780:105:000000000-CWNB3:1:1112:11921:24298	MK239931.1	99.502	402	2	0	1	402	257	658	0	734	Bacteria_Proteobacteria_Alphaproteobacteria_Rickettsiales_Anaplasmataceae_Anaplasma_Anaplasma phagocytophilum
NWSE-merged-M01780:105:000000000-CWNB3:1:2104:13788:3817	GQ110750.1	98.595	427	6	0	1	427	338	764	0	756	Bacteria_NA_NA_NA_NA_NA_uncultured bacterium		PVIL-merged-M01780:105:000000000-CWNB3:1:1119:25043:20908	MK239931.1	99.751	402	1	0	1	402	257	658	0	737	Bacteria_Proteobacteria_Alphaproteobacteria_Rickettsiales_Anaplasmataceae_Anaplasma_Anaplasma phagocytophilum
NWSE-merged-M01780:105:000000000-CWNB3:1:2103:22126:1857	LR643369.1	99.289	422	3	0	1	422	332	753	0	763	Bacteria_NA_NA_NA_NA_NA_uncultured bacterium		PVIL-merged-M01780:105:000000000-CWNB3:1:2101:4588:12252	MK239931.1	100	402	0	0	1	402	257	658	0	743	Bacteria_Proteobacteria_Alphaproteobacteria_Rickettsiales_Anaplasmataceae_Anaplasma_Anaplasma phagocytophilum
NWSE-merged-M01780:105:000000000-CWNB3:1:1113:11689:20110	KF494595.1	93.443	427	27	1	1	427	346	771	4e-177	632	Bacteria_NA_NA_NA_NA_NA_uncultured bacterium		PVIL-merged-M01780:105:000000000-CWNB3:1:2107:12753:19197	MK239931.1	99.502	402	2	0	1	402	257	658	0	732	Bacteria_Proteobacteria_Alphaproteobacteria_Rickettsiales_Anaplasmataceae_Anaplasma_Anaplasma phagocytophilum
NWSE-merged-M01780:105:000000000-CWNB3:1:1119:21217:9677	AB630573.1	90.097	414	37	4	1	412	311	722	1.12e-147	534	Bacteria_NA_NA_NA_NA_NA_uncultured bacterium		PVIL-merged-M01780:105:000000000-CWNB3:1:2107:21079:17228	MK239931.1	99.751	402	1	0	1	402	257	658	0	737	Bacteria_Proteobacteria_Alphaproteobacteria_Rickettsiales_Anaplasmataceae_Anaplasma_Anaplasma phagocytophilum
NWSE-merged-M01780:105:000000000-CWNB3:1:2112:14548:2176	LR638932.1	93.284	402	24	3	3	402	336	736	2.29e-164	590	Bacteria_NA_NA_NA_NA_NA_uncultured bacterium		PVIL-merged-M01780:105:000000000-CWNB3:1:2112:10271:23267	MK239931.1	100	402	0	0	1	402	257	658	0	743	Bacteria_Proteobacteria_Alphaproteobacteria_Rickettsiales_Anaplasmataceae_Anaplasma_Anaplasma phagocytophilum
NWSE-merged-M01780:105:000000000-CWNB3:1:2110:15138:22227	MG101063.1	100	402	0	0	1	402	17	418	0	743	Bacteria_NA_NA_NA_NA_NA_uncultured bacterium		PVIL-merged-M01780:105:000000000-CWNB3:1:2118:22100:13276	MK239931.1	100	402	0	0	1	402	257	658	0	743	Bacteria_Proteobacteria_Alphaproteobacteria_Rickettsiales_Anaplasmataceae_Anaplasma_Anaplasma phagocytophilum
NWSE-merged-M01780:105:000000000-CWNB3:1:1110:25221:14174	EU644339.1	99.289	422	3	0	1	422	352	773	0	763	Bacteria_NA_NA_NA_NA_NA_uncultured bacterium		PVIL-merged-M01780:105:000000000-CWNB3:1:2118:9569:4514	MK239931.1	100	402	0	0	1	402	257	658	0	743	Bacteria_Proteobacteria_Alphaproteobacteria_Rickettsiales_Anaplasmataceae_Anaplasma_Anaplasma phagocytophilum
NWSE-merged-M01780:105:000000000-CWNB3:1:2113:19111:12574	LR643369.1	100	422	0	0	1	422	332	753	0	780	Bacteria_NA_NA_NA_NA_NA_uncultured bacterium		PVIL-merged-M01780:105:000000000-CWNB3:1:2118:4457:5991	MK239931.1	99.502	402	2	0	1	402	257	658	0	732	Bacteria_Proteobacteria_Alphaproteobacteria_Rickettsiales_Anaplasmataceae_Anaplasma_Anaplasma phagocytophilum
NWSE-merged-M01780:105:000000000-CWNB3:1:2117:23176:9614	KF494595.1	93.443	427	27	1	1	427	346	771	4e-177	632	Bacteria_NA_NA_NA_NA_NA_uncultured bacterium		PVIL-merged-M01780:105:000000000-CWNB3:1:2119:11830:14202	MK239931.1	99.756	409	1	0	1	409	250	658	0	750	Bacteria_Proteobacteria_Alphaproteobacteria_Rickettsiales_Anaplasmataceae_Anaplasma_Anaplasma phagocytophilum
NWSE-merged-M01780:105:000000000-CWNB3:1:1106:20101:13738	AB658245.1	99.052	422	4	0	1	422	326	747	0	758	Bacteria_NA_NA_NA_NA_NA_uncultured bacterium		PVIL-merged-M01780:105:000000000-CWNB3:1:1103:4499:11345	MK239931.1	99.502	402	2	0	1	402	257	658	0	732	Bacteria_Proteobacteria_Alphaproteobacteria_Rickettsiales_Anaplasmataceae_Anaplasma_Anaplasma phagocytophilum
NWSE-merged-M01780:105:000000000-CWNB3:1:1106:24308:20596	KM185152.1	99.254	402	3	0	1	402	18	419	0	726	Bacteria_NA_NA_NA_NA_NA_uncultured bacterium		PVIL-merged-M01780:105:000000000-CWNB3:1:1101:25267:15517	MK239931.1	100	402	0	0	1	402	257	658	0	743	Bacteria_Proteobacteria_Alphaproteobacteria_Rickettsiales_Anaplasmataceae_Anaplasma_Anaplasma phagocytophilum
NWSE-merged-M01780:105:000000000-CWNB3:1:1110:12582:21681	KF598756.1	99.502	402	2	0	1	402	313	714	0	732	Bacteria_NA_NA_NA_NA_NA_uncultured bacterium		PVIL-merged-M01780:105:000000000-CWNB3:1:1101:6576:9922	MN227385.1	97.015	402	12	0	1	402	64	465	0	676	Bacteria_Proteobacteria_Alphaproteobacteria_Rickettsiales_Anaplasmataceae_Anaplasma_Anaplasma phagocytophilum
NWSE-merged-M01780:105:000000000-CWNB3:1:2116:12110:22687	LR638932.1	98.511	403	6	0	1	403	334	736	0	713	Bacteria_NA_NA_NA_NA_NA_uncultured bacterium		PVIL-merged-M01780:105:000000000-CWNB3:1:1103:7322:8973	MK239931.1	99.502	402	2	0	1	402	257	658	0	732	Bacteria_Proteobacteria_Alphaproteobacteria_Rickettsiales_Anaplasmataceae_Anaplasma_Anaplasma phagocytophilum
NWSE-merged-M01780:105:000000000-CWNB3:1:1102:17109:7546	KM185152.1	98.259	402	7	0	1	402	18	419	0	704	Bacteria_NA_NA_NA_NA_NA_uncultured bacterium		PVIL-merged-M01780:105:000000000-CWNB3:1:1111:26908:16217	MK239931.1	99.751	402	1	0	1	402	257	658	0	737	Bacteria_Proteobacteria_Alphaproteobacteria_Rickettsiales_Anaplasmataceae_Anaplasma_Anaplasma phagocytophilum
NWSE-merged-M01780:105:000000000-CWNB3:1:2109:12471:6834	KM185152.1	99.254	402	3	0	1	402	18	419	0	726	Bacteria_NA_NA_NA_NA_NA_uncultured bacterium		PVIL-merged-M01780:105:000000000-CWNB3:1:1116:2909:13463	AY969012.1	96.517	402	14	0	1	402	311	712	0	665	Bacteria_Proteobacteria_Alphaproteobacteria_Rickettsiales_Anaplasmataceae_Anaplasma_Anaplasma phagocytophilum
NWSE-merged-M01780:105:000000000-CWNB3:1:2114:19562:16040	LR640979.1	89.383	405	41	2	1	404	317	720	6.64e-140	508	Bacteria_NA_NA_NA_NA_NA_uncultured bacterium		PVIL-merged-M01780:105:000000000-CWNB3:1:1117:22669:6280	MK239931.1	100	402	0	0	1	402	257	658	0	743	Bacteria_Proteobacteria_Alphaproteobacteria_Rickettsiales_Anaplasmataceae_Anaplasma_Anaplasma phagocytophilum
NWSE-merged-M01780:105:000000000-CWNB3:1:1101:27917:8651	AB658245.1	98.595	427	6	0	1	427	326	752	0	756	Bacteria_NA_NA_NA_NA_NA_uncultured bacterium		PVIL-merged-M01780:105:000000000-CWNB3:1:1118:6386:20843	MK239931.1	100	402	0	0	1	402	257	658	0	743	Bacteria_Proteobacteria_Alphaproteobacteria_Rickettsiales_Anaplasmataceae_Anaplasma_Anaplasma phagocytophilum
NWSE-merged-M01780:105:000000000-CWNB3:1:1107:13909:17135	KP947988.1	90.571	403	36	2	1	402	21	422	3.92e-147	532	Bacteria_NA_NA_NA_NA_NA_uncultured bacterium		PVIL-merged-M01780:105:000000000-CWNB3:1:2102:8363:10721	MK239931.1	100	402	0	0	1	402	257	658	0	743	Bacteria_Proteobacteria_Alphaproteobacteria_Rickettsiales_Anaplasmataceae_Anaplasma_Anaplasma phagocytophilum
NWSE-merged-M01780:105:000000000-CWNB3:1:2117:5738:21262	KM185244.1	97.761	402	9	0	1	402	18	419	0	693	Bacteria_NA_NA_NA_NA_NA_uncultured bacterium		PVIL-merged-M01780:105:000000000-CWNB3:1:2113:24270:10385	MK239931.1	100	402	0	0	1	402	257	658	0	743	Bacteria_Proteobacteria_Alphaproteobacteria_Rickettsiales_Anaplasmataceae_Anaplasma_Anaplasma phagocytophilum
NWSE-merged-M01780:105:000000000-CWNB3:1:1109:21606:7845	AB656108.1	99.766	428	1	0	1	428	340	767	0	785	Bacteria_NA_NA_NA_NA_NA_uncultured bacterium		PVIL-merged-M01780:105:000000000-CWNB3:1:2113:10170:21412	MK239931.1	100	402	0	0	1	402	257	658	0	743	Bacteria_Proteobacteria_Alphaproteobacteria_Rickettsiales_Anaplasmataceae_Anaplasma_Anaplasma phagocytophilum
NWSE-merged-M01780:105:000000000-CWNB3:1:1109:12460:15071	AB656108.1	98.832	428	5	0	1	428	340	767	0	763	Bacteria_NA_NA_NA_NA_NA_uncultured bacterium		PVIL-merged-M01780:105:000000000-CWNB3:1:2116:6535:3710	MK239931.1	99.751	402	1	0	1	402	257	658	0	737	Bacteria_Proteobacteria_Alphaproteobacteria_Rickettsiales_Anaplasmataceae_Anaplasma_Anaplasma phagocytophilum
NWSE-merged-M01780:105:000000000-CWNB3:1:1110:13581:9074	LR643369.1	100	422	0	0	1	422	332	753	0	780	Bacteria_NA_NA_NA_NA_NA_uncultured bacterium		PVIL-merged-M01780:105:000000000-CWNB3:1:2117:12841:20405	AY969012.1	95.771	402	17	0	1	402	311	712	0	649	Bacteria_Proteobacteria_Alphaproteobacteria_Rickettsiales_Anaplasmataceae_Anaplasma_Anaplasma phagocytophilum
NWSE-merged-M01780:105:000000000-CWNB3:1:1113:14935:21751	LN715676.1	92.786	402	29	0	1	402	299	700	3.84e-162	582	Bacteria_NA_NA_NA_NA_NA_uncultured bacterium		PVIL-merged-M01780:105:000000000-CWNB3:1:1102:9423:18149	MK239931.1	100	402	0	0	1	402	257	658	0	743	Bacteria_Proteobacteria_Alphaproteobacteria_Rickettsiales_Anaplasmataceae_Anaplasma_Anaplasma phagocytophilum
NWSE-merged-M01780:105:000000000-CWNB3:1:2112:14197:22991	AB630573.1	89.901	406	37	4	1	404	311	714	3.07e-143	520	Bacteria_NA_NA_NA_NA_NA_uncultured bacterium		PVIL-merged-M01780:105:000000000-CWNB3:1:1107:16381:20496	MK239931.1	100	402	0	0	1	402	257	658	0	743	Bacteria_Proteobacteria_Alphaproteobacteria_Rickettsiales_Anaplasmataceae_Anaplasma_Anaplasma phagocytophilum
NWSE-merged-M01780:105:000000000-CWNB3:1:2104:22680:20558	KF247878.1	97.872	423	8	1	1	422	352	774	0	730	Bacteria_NA_NA_NA_NA_NA_uncultured bacterium		PVIL-merged-M01780:105:000000000-CWNB3:1:1110:16818:17516	MK239931.1	99.751	402	1	0	1	402	257	658	0	737	Bacteria_Proteobacteria_Alphaproteobacteria_Rickettsiales_Anaplasmataceae_Anaplasma_Anaplasma phagocytophilum
NWSE-merged-M01780:105:000000000-CWNB3:1:2107:9131:7214	KF494595.1	95.55	427	18	1	1	427	346	771	0	682	Bacteria_NA_NA_NA_NA_NA_uncultured bacterium		PVIL-merged-M01780:105:000000000-CWNB3:1:1111:18037:23906	MK239931.1	99.751	402	1	0	1	402	257	658	0	737	Bacteria_Proteobacteria_Alphaproteobacteria_Rickettsiales_Anaplasmataceae_Anaplasma_Anaplasma phagocytophilum
NWSE-merged-M01780:105:000000000-CWNB3:1:2109:11822:17397	LN537526.1	94.626	428	21	2	1	427	1	427	0	662	Bacteria_NA_NA_NA_NA_NA_uncultured bacterium		PVIL-merged-M01780:105:000000000-CWNB3:1:1113:9299:2064	MK239931.1	99.502	402	2	0	1	402	257	658	0	732	Bacteria_Proteobacteria_Alphaproteobacteria_Rickettsiales_Anaplasmataceae_Anaplasma_Anaplasma phagocytophilum
NWSE-merged-M01780:105:000000000-CWNB3:1:1114:2391:9296	LR638932.1	97.27	403	11	0	1	403	334	736	0	684	Bacteria_NA_NA_NA_NA_NA_uncultured bacterium		PVIL-merged-M01780:105:000000000-CWNB3:1:1114:7302:9622	MK239931.1	99.751	402	1	0	1	402	257	658	0	737	Bacteria_Proteobacteria_Alphaproteobacteria_Rickettsiales_Anaplasmataceae_Anaplasma_Anaplasma phagocytophilum
NWSE-merged-M01780:105:000000000-CWNB3:1:1119:22503:9978	LR643369.1	99.526	422	2	0	1	422	332	753	0	769	Bacteria_NA_NA_NA_NA_NA_uncultured bacterium		PVIL-merged-M01780:105:000000000-CWNB3:1:1115:22512:11536	MK239931.1	98.259	402	7	0	1	402	257	658	0	704	Bacteria_Proteobacteria_Alphaproteobacteria_Rickettsiales_Anaplasmataceae_Anaplasma_Anaplasma phagocytophilum
NWSE-merged-M01780:105:000000000-CWNB3:1:1111:7088:15184	KT791290.1	91.022	401	36	0	1	401	1	401	6.51e-150	542	Bacteria_NA_NA_NA_NA_NA_uncultured bacterium		PVIL-merged-M01780:105:000000000-CWNB3:1:2102:9496:4357	MK239931.1	100	402	0	0	1	402	257	658	0	743	Bacteria_Proteobacteria_Alphaproteobacteria_Rickettsiales_Anaplasmataceae_Anaplasma_Anaplasma phagocytophilum
NWSE-merged-M01780:105:000000000-CWNB3:1:2109:9879:6499	JQ381956.2	95.25	400	19	0	1	400	333	732	2.91e-178	636	Bacteria_NA_NA_NA_NA_NA_uncultured bacterium		PVIL-merged-M01780:105:000000000-CWNB3:1:2102:13391:3791	MK239931.1	99.502	402	2	0	1	402	257	658	0	732	Bacteria_Proteobacteria_Alphaproteobacteria_Rickettsiales_Anaplasmataceae_Anaplasma_Anaplasma phagocytophilum
NWSE-merged-M01780:105:000000000-CWNB3:1:1105:13678:20526	MG284665.1	95.943	419	17	0	1	419	1	419	0	680	Bacteria_NA_NA_NA_NA_NA_uncultured bacterium		PVIL-merged-M01780:105:000000000-CWNB3:1:2113:19944:6215	MK239931.1	100	402	0	0	1	402	257	658	0	743	Bacteria_Proteobacteria_Alphaproteobacteria_Rickettsiales_Anaplasmataceae_Anaplasma_Anaplasma phagocytophilum
NWSE-merged-M01780:105:000000000-CWNB3:1:1107:10289:5170	AB630573.1	89.901	406	37	4	1	404	311	714	3.07e-143	520	Bacteria_NA_NA_NA_NA_NA_uncultured bacterium		PVIL-merged-M01780:105:000000000-CWNB3:1:2111:24333:11842	MK239931.1	100	402	0	0	1	402	257	658	0	743	Bacteria_Proteobacteria_Alphaproteobacteria_Rickettsiales_Anaplasmataceae_Anaplasma_Anaplasma phagocytophilum
NWSE-merged-M01780:105:000000000-CWNB3:1:1115:19660:12887	AB658245.1	99.052	422	4	0	1	422	326	747	0	758	Bacteria_NA_NA_NA_NA_NA_uncultured bacterium		PVIL-merged-M01780:105:000000000-CWNB3:1:2114:13607:23175	MK239931.1	100	402	0	0	1	402	257	658	0	743	Bacteria_Proteobacteria_Alphaproteobacteria_Rickettsiales_Anaplasmataceae_Anaplasma_Anaplasma phagocytophilum
NWSE-merged-M01780:105:000000000-CWNB3:1:2117:18317:18941	JQ381957.2	97.765	358	8	0	1	358	333	690	1.05e-172	617	Bacteria_NA_NA_NA_NA_NA_uncultured bacterium		PVIL-merged-M01780:105:000000000-CWNB3:1:2113:11554:22366	MK239931.1	100	402	0	0	1	402	257	658	0	743	Bacteria_Proteobacteria_Alphaproteobacteria_Rickettsiales_Anaplasmataceae_Anaplasma_Anaplasma phagocytophilum
NWSE-merged-M01780:105:000000000-CWNB3:1:2112:14491:5570	LR643369.1	99.289	422	3	0	1	422	332	753	0	763	Bacteria_NA_NA_NA_NA_NA_uncultured bacterium		PVIL-merged-M01780:105:000000000-CWNB3:1:2117:16994:6217	MK239931.1	99.751	402	1	0	1	402	257	658	0	737	Bacteria_Proteobacteria_Alphaproteobacteria_Rickettsiales_Anaplasmataceae_Anaplasma_Anaplasma phagocytophilum
NWSE-merged-M01780:105:000000000-CWNB3:1:1105:15262:20058	AB630573.1	89.901	406	37	4	1	404	311	714	3.07e-143	520	Bacteria_NA_NA_NA_NA_NA_uncultured bacterium		PVIL-merged-M01780:105:000000000-CWNB3:1:2119:29083:11922	MK239931.1	100	402	0	0	1	402	257	658	0	743	Bacteria_Proteobacteria_Alphaproteobacteria_Rickettsiales_Anaplasmataceae_Anaplasma_Anaplasma phagocytophilum
NWSE-merged-M01780:105:000000000-CWNB3:1:1110:9957:15264	LT800236.1	94.279	402	23	0	1	402	199	600	3.78e-172	616	Bacteria_NA_NA_NA_NA_NA_uncultured bacterium		PVIL-merged-M01780:105:000000000-CWNB3:1:2119:4618:7119	MK239931.1	99.751	402	1	0	1	402	257	658	0	737	Bacteria_Proteobacteria_Alphaproteobacteria_Rickettsiales_Anaplasmataceae_Anaplasma_Anaplasma phagocytophilum
NWSE-merged-M01780:105:000000000-CWNB3:1:1118:16013:10268	MN503549.1	99.531	426	2	0	1	426	255	680	0	776	Bacteria_NA_NA_NA_NA_NA_uncultured bacterium		PVIL-merged-M01780:105:000000000-CWNB3:1:1103:26684:20836	MN227385.1	96.822	409	13	0	1	409	64	472	0	684	Bacteria_Proteobacteria_Alphaproteobacteria_Rickettsiales_Anaplasmataceae_Anaplasma_Anaplasma phagocytophilum
NWSE-merged-M01780:105:000000000-CWNB3:1:1119:10469:12383	AB630573.1	86.029	408	49	7	1	404	311	714	1.48e-116	431	Bacteria_NA_NA_NA_NA_NA_uncultured bacterium		PVIL-merged-M01780:105:000000000-CWNB3:1:1108:18907:9271	MK239931.1	100	402	0	0	1	402	257	658	0	743	Bacteria_Proteobacteria_Alphaproteobacteria_Rickettsiales_Anaplasmataceae_Anaplasma_Anaplasma phagocytophilum
NWSE-merged-M01780:105:000000000-CWNB3:1:1119:3225:9178	LR638932.1	99.752	403	1	0	1	403	334	736	0	739	Bacteria_NA_NA_NA_NA_NA_uncultured bacterium		PVIL-merged-M01780:105:000000000-CWNB3:1:1108:7873:4027	AY969012.1	96.517	402	14	0	1	402	311	712	0	665	Bacteria_Proteobacteria_Alphaproteobacteria_Rickettsiales_Anaplasmataceae_Anaplasma_Anaplasma phagocytophilum
NWSE-merged-M01780:105:000000000-CWNB3:1:1108:8619:19515	MG101063.1	100	402	0	0	1	402	17	418	0	743	Bacteria_NA_NA_NA_NA_NA_uncultured bacterium		PVIL-merged-M01780:105:000000000-CWNB3:1:1110:25361:15202	MK239931.1	100	402	0	0	1	402	257	658	0	743	Bacteria_Proteobacteria_Alphaproteobacteria_Rickettsiales_Anaplasmataceae_Anaplasma_Anaplasma phagocytophilum
NWSE-merged-M01780:105:000000000-CWNB3:1:2111:7249:21883	KY691774.1	99.007	403	4	0	1	403	18	420	0	723	Bacteria_NA_NA_NA_NA_NA_uncultured bacterium		PVIL-merged-M01780:105:000000000-CWNB3:1:1110:14076:11053	MK239931.1	100	402	0	0	1	402	257	658	0	743	Bacteria_Proteobacteria_Alphaproteobacteria_Rickettsiales_Anaplasmataceae_Anaplasma_Anaplasma phagocytophilum
NWSE-merged-M01780:105:000000000-CWNB3:1:2117:20543:11712	LR643369.1	99.763	422	1	0	1	422	332	753	0	774	Bacteria_NA_NA_NA_NA_NA_uncultured bacterium		PVIL-merged-M01780:105:000000000-CWNB3:1:1112:7368:24324	MK239931.1	99.502	402	2	0	1	402	257	658	0	732	Bacteria_Proteobacteria_Alphaproteobacteria_Rickettsiales_Anaplasmataceae_Anaplasma_Anaplasma phagocytophilum
NWSE-merged-M01780:105:000000000-CWNB3:1:1108:13778:17147	AB630573.1	89.655	406	38	4	1	404	311	714	1.43e-141	514	Bacteria_NA_NA_NA_NA_NA_uncultured bacterium		PVIL-merged-M01780:105:000000000-CWNB3:1:1114:4609:7326	MK239931.1	98.756	402	5	0	1	402	257	658	0	715	Bacteria_Proteobacteria_Alphaproteobacteria_Rickettsiales_Anaplasmataceae_Anaplasma_Anaplasma phagocytophilum
NWSE-merged-M01780:105:000000000-CWNB3:1:2104:10708:6298	KM852415.1	95.361	388	18	0	1	388	343	730	3.11e-173	619	Bacteria_NA_NA_NA_NA_NA_uncultured bacterium		PVIL-merged-M01780:105:000000000-CWNB3:1:1115:20251:12019	MK239931.1	100	402	0	0	1	402	257	658	0	743	Bacteria_Proteobacteria_Alphaproteobacteria_Rickettsiales_Anaplasmataceae_Anaplasma_Anaplasma phagocytophilum
NWSE-merged-M01780:105:000000000-CWNB3:1:2113:21375:22498	LN537526.1	94.626	428	21	2	1	427	1	427	0	662	Bacteria_NA_NA_NA_NA_NA_uncultured bacterium		PVIL-merged-M01780:105:000000000-CWNB3:1:1115:21803:22905	MK239931.1	100	402	0	0	1	402	257	658	0	743	Bacteria_Proteobacteria_Alphaproteobacteria_Rickettsiales_Anaplasmataceae_Anaplasma_Anaplasma phagocytophilum
NWSE-merged-M01780:105:000000000-CWNB3:1:1110:28040:16856	AB658245.1	99.052	422	4	0	1	422	326	747	0	758	Bacteria_NA_NA_NA_NA_NA_uncultured bacterium		PVIL-merged-M01780:105:000000000-CWNB3:1:1118:13273:8819	AY969012.1	96.269	402	15	0	1	402	311	712	0	660	Bacteria_Proteobacteria_Alphaproteobacteria_Rickettsiales_Anaplasmataceae_Anaplasma_Anaplasma phagocytophilum
NWSE-merged-M01780:105:000000000-CWNB3:1:1111:17348:2661	AB658245.1	99.052	422	4	0	1	422	326	747	0	758	Bacteria_NA_NA_NA_NA_NA_uncultured bacterium		PVIL-merged-M01780:105:000000000-CWNB3:1:1119:24108:14053	MN227385.1	94.776	402	21	0	1	402	64	465	1.75e-175	627	Bacteria_Proteobacteria_Alphaproteobacteria_Rickettsiales_Anaplasmataceae_Anaplasma_Anaplasma phagocytophilum
NWSE-merged-M01780:105:000000000-CWNB3:1:2115:19676:20046	MG101063.1	100	402	0	0	1	402	17	418	0	743	Bacteria_NA_NA_NA_NA_NA_uncultured bacterium		PVIL-merged-M01780:105:000000000-CWNB3:1:2105:27688:6987	MK239931.1	99.502	402	2	0	1	402	257	658	0	732	Bacteria_Proteobacteria_Alphaproteobacteria_Rickettsiales_Anaplasmataceae_Anaplasma_Anaplasma phagocytophilum
NWSE-merged-M01780:105:000000000-CWNB3:1:1110:4108:17883	LR638932.1	100	403	0	0	1	403	334	736	0	745	Bacteria_NA_NA_NA_NA_NA_uncultured bacterium		PVIL-merged-M01780:105:000000000-CWNB3:1:2104:11760:23982	MK239931.1	97.015	402	12	0	1	402	257	658	0	676	Bacteria_Proteobacteria_Alphaproteobacteria_Rickettsiales_Anaplasmataceae_Anaplasma_Anaplasma phagocytophilum
NWSE-merged-M01780:105:000000000-CWNB3:1:1115:28892:13832	AB630573.1	89.901	406	37	4	1	404	311	714	3.07e-143	520	Bacteria_NA_NA_NA_NA_NA_uncultured bacterium		PVIL-merged-M01780:105:000000000-CWNB3:1:2108:7914:3006	MK239931.1	99.502	402	2	0	1	402	257	658	0	732	Bacteria_Proteobacteria_Alphaproteobacteria_Rickettsiales_Anaplasmataceae_Anaplasma_Anaplasma phagocytophilum
NWSE-merged-M01780:105:000000000-CWNB3:1:2118:21332:4074	LK025655.2	99.751	402	1	0	1	402	341	742	0	737	Bacteria_NA_NA_NA_NA_NA_uncultured bacterium		PVIL-merged-M01780:105:000000000-CWNB3:1:2109:19678:11974	MK239931.1	99.502	402	2	0	1	402	257	658	0	732	Bacteria_Proteobacteria_Alphaproteobacteria_Rickettsiales_Anaplasmataceae_Anaplasma_Anaplasma phagocytophilum
NWSE-merged-M01780:105:000000000-CWNB3:1:2118:24504:23840	MH525291.1	97.945	292	6	0	111	402	136	427	2.38e-139	507	Bacteria_NA_NA_NA_NA_NA_uncultured bacterium		PVIL-merged-M01780:105:000000000-CWNB3:1:2109:12633:17325	MK239931.1	99.751	402	1	0	1	402	257	658	0	737	Bacteria_Proteobacteria_Alphaproteobacteria_Rickettsiales_Anaplasmataceae_Anaplasma_Anaplasma phagocytophilum
NWSE-merged-M01780:105:000000000-CWNB3:1:1111:4290:16691	KY691774.1	99.256	403	3	0	1	403	18	420	0	728	Bacteria_NA_NA_NA_NA_NA_uncultured bacterium		PVIL-merged-M01780:105:000000000-CWNB3:1:2115:20906:5225	AY969012.1	97.761	402	9	0	1	402	311	712	0	693	Bacteria_Proteobacteria_Alphaproteobacteria_Rickettsiales_Anaplasmataceae_Anaplasma_Anaplasma phagocytophilum
NWSE-merged-M01780:105:000000000-CWNB3:1:2119:26531:9705	EU644339.1	98.815	422	5	0	1	422	352	773	0	752	Bacteria_NA_NA_NA_NA_NA_uncultured bacterium		PVIL-merged-M01780:105:000000000-CWNB3:1:2116:16258:24434	MK239931.1	99.751	402	1	0	1	402	257	658	0	737	Bacteria_Proteobacteria_Alphaproteobacteria_Rickettsiales_Anaplasmataceae_Anaplasma_Anaplasma phagocytophilum
NWSE-merged-M01780:105:000000000-CWNB3:1:1102:19541:23913	AB658245.1	99.052	422	4	0	1	422	326	747	0	758	Bacteria_NA_NA_NA_NA_NA_uncultured bacterium		PVIL-merged-M01780:105:000000000-CWNB3:1:1106:5620:21748	MK239931.1	98.054	411	8	0	1	411	257	667	0	715	Bacteria_Proteobacteria_Alphaproteobacteria_Rickettsiales_Anaplasmataceae_Anaplasma_Anaplasma phagocytophilum
NWSE-merged-M01780:105:000000000-CWNB3:1:1112:20127:12214	JQ460282.1	99.763	422	1	0	1	422	359	780	0	774	Bacteria_NA_NA_NA_NA_NA_uncultured bacterium		PVIL-merged-M01780:105:000000000-CWNB3:1:1108:7343:10160	MK239931.1	100	402	0	0	1	402	257	658	0	743	Bacteria_Proteobacteria_Alphaproteobacteria_Rickettsiales_Anaplasmataceae_Anaplasma_Anaplasma phagocytophilum
NWSE-merged-M01780:105:000000000-CWNB3:1:2109:16248:8883	LK025655.2	99.254	402	3	0	1	402	341	742	0	726	Bacteria_NA_NA_NA_NA_NA_uncultured bacterium		PVIL-merged-M01780:105:000000000-CWNB3:1:1110:19482:3676	MK239931.1	99.005	402	4	0	1	402	257	658	0	721	Bacteria_Proteobacteria_Alphaproteobacteria_Rickettsiales_Anaplasmataceae_Anaplasma_Anaplasma phagocytophilum
NWSE-merged-M01780:105:000000000-CWNB3:1:1118:17023:8145	AY600928.1	96.667	420	14	0	1	420	18	437	0	699	Bacteria_NA_NA_NA_NA_NA_uncultured bacterium		PVIL-merged-M01780:105:000000000-CWNB3:1:1110:19076:6230	MK239931.1	100	402	0	0	1	402	257	658	0	743	Bacteria_Proteobacteria_Alphaproteobacteria_Rickettsiales_Anaplasmataceae_Anaplasma_Anaplasma phagocytophilum
NWSE-merged-M01780:105:000000000-CWNB3:1:2108:12446:10258	LK025655.2	99.502	402	2	0	1	402	341	742	0	732	Bacteria_NA_NA_NA_NA_NA_uncultured bacterium		PVIL-merged-M01780:105:000000000-CWNB3:1:1112:22368:10891	MK239931.1	100	402	0	0	1	402	257	658	0	743	Bacteria_Proteobacteria_Alphaproteobacteria_Rickettsiales_Anaplasmataceae_Anaplasma_Anaplasma phagocytophilum
NWSE-merged-M01780:105:000000000-CWNB3:1:2114:10040:23975	LR643369.1	99.052	422	4	0	1	422	332	753	0	758	Bacteria_NA_NA_NA_NA_NA_uncultured bacterium		PVIL-merged-M01780:105:000000000-CWNB3:1:1114:9818:13797	MK239931.1	99.005	402	4	0	1	402	257	658	0	721	Bacteria_Proteobacteria_Alphaproteobacteria_Rickettsiales_Anaplasmataceae_Anaplasma_Anaplasma phagocytophilum
NWSE-merged-M01780:105:000000000-CWNB3:1:2116:3049:8149	AB658245.1	99.052	422	4	0	1	422	326	747	0	758	Bacteria_NA_NA_NA_NA_NA_uncultured bacterium		PVIL-merged-M01780:105:000000000-CWNB3:1:1113:25424:11710	MK239931.1	99.751	402	1	0	1	402	257	658	0	737	Bacteria_Proteobacteria_Alphaproteobacteria_Rickettsiales_Anaplasmataceae_Anaplasma_Anaplasma phagocytophilum
NWSE-merged-M01780:105:000000000-CWNB3:1:2115:26838:16625	KF598756.1	95.274	402	19	0	1	402	313	714	8.16e-179	638	Bacteria_NA_NA_NA_NA_NA_uncultured bacterium		PVIL-merged-M01780:105:000000000-CWNB3:1:1115:8493:11119	MK239931.1	100	402	0	0	1	402	257	658	0	743	Bacteria_Proteobacteria_Alphaproteobacteria_Rickettsiales_Anaplasmataceae_Anaplasma_Anaplasma phagocytophilum
NWSE-merged-M01780:105:000000000-CWNB3:1:2104:24809:19614	AB630573.1	89.901	406	37	4	1	404	311	714	3.07e-143	520	Bacteria_NA_NA_NA_NA_NA_uncultured bacterium		PVIL-merged-M01780:105:000000000-CWNB3:1:1116:27281:19422	MK239931.1	99.005	402	4	0	1	402	257	658	0	721	Bacteria_Proteobacteria_Alphaproteobacteria_Rickettsiales_Anaplasmataceae_Anaplasma_Anaplasma phagocytophilum
NWSE-merged-M01780:105:000000000-CWNB3:1:2102:7097:18364	AY600928.1	96.429	420	15	0	1	420	18	437	0	693	Bacteria_NA_NA_NA_NA_NA_uncultured bacterium		PVIL-merged-M01780:105:000000000-CWNB3:1:2101:11836:17676	AY969012.1	98.01	402	8	0	1	402	311	712	0	699	Bacteria_Proteobacteria_Alphaproteobacteria_Rickettsiales_Anaplasmataceae_Anaplasma_Anaplasma phagocytophilum
NWSE-merged-M01780:105:000000000-CWNB3:1:2113:8071:17890	KF247878.1	97.4	423	10	1	1	422	352	774	0	719	Bacteria_NA_NA_NA_NA_NA_uncultured bacterium		PVIL-merged-M01780:105:000000000-CWNB3:1:2103:27158:15811	MK239931.1	100	402	0	0	1	402	257	658	0	743	Bacteria_Proteobacteria_Alphaproteobacteria_Rickettsiales_Anaplasmataceae_Anaplasma_Anaplasma phagocytophilum
NWSE-merged-M01780:105:000000000-CWNB3:1:1104:12364:23826	KU382131.1	98.765	405	5	0	1	405	277	681	0	721	Bacteria_NA_NA_NA_NA_NA_uncultured bacterium		PVIL-merged-M01780:105:000000000-CWNB3:1:2107:7628:4991	MK239931.1	99.005	402	4	0	1	402	257	658	0	721	Bacteria_Proteobacteria_Alphaproteobacteria_Rickettsiales_Anaplasmataceae_Anaplasma_Anaplasma phagocytophilum
NWSE-merged-M01780:105:000000000-CWNB3:1:1112:4219:7887	KM185152.1	99.005	402	4	0	1	402	18	419	0	721	Bacteria_NA_NA_NA_NA_NA_uncultured bacterium		PVIL-merged-M01780:105:000000000-CWNB3:1:2109:21606:16567	MK239931.1	100	402	0	0	1	402	257	658	0	743	Bacteria_Proteobacteria_Alphaproteobacteria_Rickettsiales_Anaplasmataceae_Anaplasma_Anaplasma phagocytophilum
NWSE-merged-M01780:105:000000000-CWNB3:1:2109:11538:21624	AB630573.1	89.655	406	38	4	1	404	311	714	1.43e-141	514	Bacteria_NA_NA_NA_NA_NA_uncultured bacterium		PVIL-merged-M01780:105:000000000-CWNB3:1:2109:13158:11630	MK239931.1	100	402	0	0	1	402	257	658	0	743	Bacteria_Proteobacteria_Alphaproteobacteria_Rickettsiales_Anaplasmataceae_Anaplasma_Anaplasma phagocytophilum
NWSE-merged-M01780:105:000000000-CWNB3:1:2110:21016:13152	JQ382688.2	94.09	423	23	2	1	422	332	753	6.58e-180	641	Bacteria_NA_NA_NA_NA_NA_uncultured bacterium		PVIL-merged-M01780:105:000000000-CWNB3:1:2111:17972:3836	MK239931.1	99.005	402	4	0	1	402	257	658	0	721	Bacteria_Proteobacteria_Alphaproteobacteria_Rickettsiales_Anaplasmataceae_Anaplasma_Anaplasma phagocytophilum
NWSE-merged-M01780:105:000000000-CWNB3:1:2110:6531:6852	AB658245.1	98.815	422	5	0	1	422	326	747	0	752	Bacteria_NA_NA_NA_NA_NA_uncultured bacterium		PVIL-merged-M01780:105:000000000-CWNB3:1:2114:21919:23692	MK239931.1	99.502	402	2	0	1	402	257	658	0	732	Bacteria_Proteobacteria_Alphaproteobacteria_Rickettsiales_Anaplasmataceae_Anaplasma_Anaplasma phagocytophilum
NWSE-merged-M01780:105:000000000-CWNB3:1:2112:8143:22535	KF494595.1	95.082	427	20	1	1	427	346	771	0	671	Bacteria_NA_NA_NA_NA_NA_uncultured bacterium		PVIL-merged-M01780:105:000000000-CWNB3:1:2115:7747:19807	MK239931.1	100	402	0	0	1	402	257	658	0	743	Bacteria_Proteobacteria_Alphaproteobacteria_Rickettsiales_Anaplasmataceae_Anaplasma_Anaplasma phagocytophilum
NWSE-merged-M01780:105:000000000-CWNB3:1:2113:27412:15408	KY691774.1	99.256	403	3	0	1	403	18	420	0	728	Bacteria_NA_NA_NA_NA_NA_uncultured bacterium		PVIL-merged-M01780:105:000000000-CWNB3:1:2116:18661:23394	MK239931.1	100	402	0	0	1	402	257	658	0	743	Bacteria_Proteobacteria_Alphaproteobacteria_Rickettsiales_Anaplasmataceae_Anaplasma_Anaplasma phagocytophilum
NWSE-merged-M01780:105:000000000-CWNB3:1:2119:25559:9201	HM339907.1	99.063	427	4	0	1	427	338	764	0	767	Bacteria_NA_NA_NA_NA_NA_uncultured bacterium		PVIL-merged-M01780:105:000000000-CWNB3:1:1104:16163:2342	MK239931.1	100	402	0	0	1	402	257	658	0	743	Bacteria_Proteobacteria_Alphaproteobacteria_Rickettsiales_Anaplasmataceae_Anaplasma_Anaplasma phagocytophilum
NWSE-merged-M01780:105:000000000-CWNB3:1:1108:3457:15736	KF598756.1	97.761	402	9	0	1	402	313	714	0	693	Bacteria_NA_NA_NA_NA_NA_uncultured bacterium		PVIL-merged-M01780:105:000000000-CWNB3:1:1109:16873:14525	MK239931.1	99.502	402	2	0	1	402	257	658	0	732	Bacteria_Proteobacteria_Alphaproteobacteria_Rickettsiales_Anaplasmataceae_Anaplasma_Anaplasma phagocytophilum
NWSE-merged-M01780:105:000000000-CWNB3:1:2104:21973:18651	MN503549.1	99.296	426	3	0	1	426	255	680	0	771	Bacteria_NA_NA_NA_NA_NA_uncultured bacterium		PVIL-merged-M01780:105:000000000-CWNB3:1:1114:8234:20424	MK239931.1	100	402	0	0	1	402	257	658	0	743	Bacteria_Proteobacteria_Alphaproteobacteria_Rickettsiales_Anaplasmataceae_Anaplasma_Anaplasma phagocytophilum
NWSE-merged-M01780:105:000000000-CWNB3:1:2105:21001:14980	MN503549.1	99.296	426	3	0	1	426	255	680	0	771	Bacteria_NA_NA_NA_NA_NA_uncultured bacterium		PVIL-merged-M01780:105:000000000-CWNB3:1:1117:20387:8754	MK239931.1	100	402	0	0	1	402	257	658	0	743	Bacteria_Proteobacteria_Alphaproteobacteria_Rickettsiales_Anaplasmataceae_Anaplasma_Anaplasma phagocytophilum
NWSE-merged-M01780:105:000000000-CWNB3:1:2107:11767:19654	KY691774.1	99.256	403	3	0	1	403	18	420	0	728	Bacteria_NA_NA_NA_NA_NA_uncultured bacterium		PVIL-merged-M01780:105:000000000-CWNB3:1:1117:25450:16733	MK239931.1	100	402	0	0	1	402	257	658	0	743	Bacteria_Proteobacteria_Alphaproteobacteria_Rickettsiales_Anaplasmataceae_Anaplasma_Anaplasma phagocytophilum
NWSE-merged-M01780:105:000000000-CWNB3:1:1102:23110:15540	AB658245.1	98.815	422	5	0	1	422	326	747	0	752	Bacteria_NA_NA_NA_NA_NA_uncultured bacterium		PVIL-merged-M01780:105:000000000-CWNB3:1:1119:24599:15033	MK239931.1	100	402	0	0	1	402	257	658	0	743	Bacteria_Proteobacteria_Alphaproteobacteria_Rickettsiales_Anaplasmataceae_Anaplasma_Anaplasma phagocytophilum
NWSE-merged-M01780:105:000000000-CWNB3:1:1108:20990:15737	KU382131.1	99.012	405	4	0	1	405	277	681	0	726	Bacteria_NA_NA_NA_NA_NA_uncultured bacterium		PVIL-merged-M01780:105:000000000-CWNB3:1:1118:11347:22400	MK239931.1	99.751	402	1	0	1	402	257	658	0	737	Bacteria_Proteobacteria_Alphaproteobacteria_Rickettsiales_Anaplasmataceae_Anaplasma_Anaplasma phagocytophilum
NWSE-merged-M01780:105:000000000-CWNB3:1:1111:17594:23635	LN537526.1	94.626	428	21	2	1	427	1	427	0	662	Bacteria_NA_NA_NA_NA_NA_uncultured bacterium		PVIL-merged-M01780:105:000000000-CWNB3:1:2102:13819:17689	MK239931.1	99.751	402	1	0	1	402	257	658	0	737	Bacteria_Proteobacteria_Alphaproteobacteria_Rickettsiales_Anaplasmataceae_Anaplasma_Anaplasma phagocytophilum
NWSE-merged-M01780:105:000000000-CWNB3:1:2119:4596:8477	KF094133.1	99.532	427	2	0	1	427	331	757	0	778	Bacteria_NA_NA_NA_NA_NA_uncultured bacterium		PVIL-merged-M01780:105:000000000-CWNB3:1:2104:17868:19876	MK239931.1	100	402	0	0	1	402	257	658	0	743	Bacteria_Proteobacteria_Alphaproteobacteria_Rickettsiales_Anaplasmataceae_Anaplasma_Anaplasma phagocytophilum
NWSE-merged-M01780:105:000000000-CWNB3:1:1103:15494:21435	MG284665.1	96.698	424	14	0	1	424	1	424	0	706	Bacteria_NA_NA_NA_NA_NA_uncultured bacterium		PVIL-merged-M01780:105:000000000-CWNB3:1:2107:25476:4995	MK239931.1	99.751	402	1	0	1	402	257	658	0	737	Bacteria_Proteobacteria_Alphaproteobacteria_Rickettsiales_Anaplasmataceae_Anaplasma_Anaplasma phagocytophilum
NWSE-merged-M01780:105:000000000-CWNB3:1:1104:17703:8832	JQ381952.2	91.726	423	29	5	1	420	333	752	4.04e-162	582	Bacteria_NA_NA_NA_NA_NA_uncultured bacterium		PVIL-merged-M01780:105:000000000-CWNB3:1:2110:19732:13032	MK239931.1	98.507	402	6	0	1	402	257	658	0	710	Bacteria_Proteobacteria_Alphaproteobacteria_Rickettsiales_Anaplasmataceae_Anaplasma_Anaplasma phagocytophilum
NWSE-merged-M01780:105:000000000-CWNB3:1:1103:23144:5634	LR638932.1	100	403	0	0	1	403	334	736	0	745	Bacteria_NA_NA_NA_NA_NA_uncultured bacterium		PVIL-merged-M01780:105:000000000-CWNB3:1:2111:21616:14635	MK239931.1	100	402	0	0	1	402	257	658	0	743	Bacteria_Proteobacteria_Alphaproteobacteria_Rickettsiales_Anaplasmataceae_Anaplasma_Anaplasma phagocytophilum
NWSE-merged-M01780:105:000000000-CWNB3:1:1107:7148:5249	KF247878.1	97.872	423	8	1	1	422	352	774	0	730	Bacteria_NA_NA_NA_NA_NA_uncultured bacterium		PVIL-merged-M01780:105:000000000-CWNB3:1:2112:6651:12384	MK239931.1	100	402	0	0	1	402	257	658	0	743	Bacteria_Proteobacteria_Alphaproteobacteria_Rickettsiales_Anaplasmataceae_Anaplasma_Anaplasma phagocytophilum
NWSE-merged-M01780:105:000000000-CWNB3:1:1107:26541:8999	LR638932.1	100	403	0	0	1	403	334	736	0	745	Bacteria_NA_NA_NA_NA_NA_uncultured bacterium		PVIL-merged-M01780:105:000000000-CWNB3:1:2110:13259:11791	MK239931.1	98.756	402	5	0	1	402	257	658	0	715	Bacteria_Proteobacteria_Alphaproteobacteria_Rickettsiales_Anaplasmataceae_Anaplasma_Anaplasma phagocytophilum
NWSE-merged-M01780:105:000000000-CWNB3:1:2108:25527:15865	LR643369.1	99.289	422	3	0	1	422	332	753	0	763	Bacteria_NA_NA_NA_NA_NA_uncultured bacterium		PVIL-merged-M01780:105:000000000-CWNB3:1:2115:23727:16525	MK239931.1	100	402	0	0	1	402	257	658	0	743	Bacteria_Proteobacteria_Alphaproteobacteria_Rickettsiales_Anaplasmataceae_Anaplasma_Anaplasma phagocytophilum
NWSE-merged-M01780:105:000000000-CWNB3:1:1117:13870:20115	LR638932.1	97.277	404	9	2	1	403	334	736	0	684	Bacteria_NA_NA_NA_NA_NA_uncultured bacterium		PVIL-merged-M01780:105:000000000-CWNB3:1:2111:11870:3143	MK239931.1	100	402	0	0	1	402	257	658	0	743	Bacteria_Proteobacteria_Alphaproteobacteria_Rickettsiales_Anaplasmataceae_Anaplasma_Anaplasma phagocytophilum
NWSE-merged-M01780:105:000000000-CWNB3:1:1115:9723:2274	JQ460282.1	99.763	422	1	0	1	422	359	780	0	774	Bacteria_NA_NA_NA_NA_NA_uncultured bacterium		PVIL-merged-M01780:105:000000000-CWNB3:1:2116:15305:7588	MK239931.1	100	402	0	0	1	402	257	658	0	743	Bacteria_Proteobacteria_Alphaproteobacteria_Rickettsiales_Anaplasmataceae_Anaplasma_Anaplasma phagocytophilum
NWSE-merged-M01780:105:000000000-CWNB3:1:1118:11689:9573	KM185152.1	99.254	402	3	0	1	402	18	419	0	726	Bacteria_NA_NA_NA_NA_NA_uncultured bacterium		PVIL-merged-M01780:105:000000000-CWNB3:1:2117:24969:4324	MK239931.1	99.005	402	4	0	1	402	257	658	0	721	Bacteria_Proteobacteria_Alphaproteobacteria_Rickettsiales_Anaplasmataceae_Anaplasma_Anaplasma phagocytophilum
NWSE-merged-M01780:105:000000000-CWNB3:1:2111:15661:10075	EU644339.1	99.526	422	2	0	1	422	352	773	0	769	Bacteria_NA_NA_NA_NA_NA_uncultured bacterium		PVIL-merged-M01780:105:000000000-CWNB3:1:1102:16993:15853	MK239931.1	100	409	0	0	1	409	257	665	0	756	Bacteria_Proteobacteria_Alphaproteobacteria_Rickettsiales_Anaplasmataceae_Anaplasma_Anaplasma phagocytophilum
NWSE-merged-M01780:105:000000000-CWNB3:1:1112:5554:14797	LK025655.2	99.751	402	1	0	1	402	341	742	0	737	Bacteria_NA_NA_NA_NA_NA_uncultured bacterium		PVIL-merged-M01780:105:000000000-CWNB3:1:1108:8080:7327	MK239931.1	100	402	0	0	1	402	257	658	0	743	Bacteria_Proteobacteria_Alphaproteobacteria_Rickettsiales_Anaplasmataceae_Anaplasma_Anaplasma phagocytophilum
NWSE-merged-M01780:105:000000000-CWNB3:1:2102:7348:15357	EF074243.1	99.005	402	4	0	1	402	271	672	0	721	Bacteria_NA_NA_NA_NA_NA_uncultured bacterium		PVIL-merged-M01780:105:000000000-CWNB3:1:1107:8996:5826	MK239931.1	100	402	0	0	1	402	257	658	0	743	Bacteria_Proteobacteria_Alphaproteobacteria_Rickettsiales_Anaplasmataceae_Anaplasma_Anaplasma phagocytophilum
NWSE-merged-M01780:105:000000000-CWNB3:1:2103:24609:20725	KY691774.1	99.007	403	4	0	1	403	18	420	0	723	Bacteria_NA_NA_NA_NA_NA_uncultured bacterium		PVIL-merged-M01780:105:000000000-CWNB3:1:1109:8442:18969	MK239931.1	98.507	402	5	1	1	401	257	658	0	708	Bacteria_Proteobacteria_Alphaproteobacteria_Rickettsiales_Anaplasmataceae_Anaplasma_Anaplasma phagocytophilum
NWSE-merged-M01780:105:000000000-CWNB3:1:2105:23393:3205	MG101063.1	96.742	399	13	0	1	399	17	415	0	665	Bacteria_NA_NA_NA_NA_NA_uncultured bacterium		PVIL-merged-M01780:105:000000000-CWNB3:1:1110:23022:21340	MK239931.1	99.502	402	1	1	1	401	257	658	0	730	Bacteria_Proteobacteria_Alphaproteobacteria_Rickettsiales_Anaplasmataceae_Anaplasma_Anaplasma phagocytophilum
NWSE-merged-M01780:105:000000000-CWNB3:1:1106:23350:20845	LK025655.2	99.751	402	1	0	1	402	341	742	0	737	Bacteria_NA_NA_NA_NA_NA_uncultured bacterium		PVIL-merged-M01780:105:000000000-CWNB3:1:1115:28042:17706	MK239931.1	100	402	0	0	1	402	257	658	0	743	Bacteria_Proteobacteria_Alphaproteobacteria_Rickettsiales_Anaplasmataceae_Anaplasma_Anaplasma phagocytophilum
NWSE-merged-M01780:105:000000000-CWNB3:1:2102:17900:5325	KF598756.1	98.01	402	8	0	1	402	313	714	0	699	Bacteria_NA_NA_NA_NA_NA_uncultured bacterium		PVIL-merged-M01780:105:000000000-CWNB3:1:1114:21582:7004	MK239931.1	100	402	0	0	1	402	257	658	0	743	Bacteria_Proteobacteria_Alphaproteobacteria_Rickettsiales_Anaplasmataceae_Anaplasma_Anaplasma phagocytophilum
NWSE-merged-M01780:105:000000000-CWNB3:1:2103:12208:3805	MG284665.1	96.226	424	16	0	1	424	1	424	0	695	Bacteria_NA_NA_NA_NA_NA_uncultured bacterium		PVIL-merged-M01780:105:000000000-CWNB3:1:1116:24876:17636	MN227385.1	96.517	402	14	0	1	402	64	465	0	665	Bacteria_Proteobacteria_Alphaproteobacteria_Rickettsiales_Anaplasmataceae_Anaplasma_Anaplasma phagocytophilum
NWSE-merged-M01780:105:000000000-CWNB3:1:2107:12952:6085	AB630573.1	89.163	406	40	4	1	404	311	714	3.09e-138	503	Bacteria_NA_NA_NA_NA_NA_uncultured bacterium		PVIL-merged-M01780:105:000000000-CWNB3:1:1116:3723:8354	MK239931.1	100	402	0	0	1	402	257	658	0	743	Bacteria_Proteobacteria_Alphaproteobacteria_Rickettsiales_Anaplasmataceae_Anaplasma_Anaplasma phagocytophilum
NWSE-merged-M01780:105:000000000-CWNB3:1:2106:25071:15350	JQ380822.2	99.752	403	1	0	1	403	333	735	0	739	Bacteria_NA_NA_NA_NA_NA_uncultured bacterium		PVIL-merged-M01780:105:000000000-CWNB3:1:1119:15485:8016	MK239931.1	99.005	402	4	0	1	402	257	658	0	721	Bacteria_Proteobacteria_Alphaproteobacteria_Rickettsiales_Anaplasmataceae_Anaplasma_Anaplasma phagocytophilum
NWSE-merged-M01780:105:000000000-CWNB3:1:2110:17489:18603	AB656108.1	99.766	428	1	0	1	428	340	767	0	785	Bacteria_NA_NA_NA_NA_NA_uncultured bacterium		PVIL-merged-M01780:105:000000000-CWNB3:1:2103:19429:4935	MK239931.1	99.751	402	1	0	1	402	257	658	0	737	Bacteria_Proteobacteria_Alphaproteobacteria_Rickettsiales_Anaplasmataceae_Anaplasma_Anaplasma phagocytophilum
NWSE-merged-M01780:105:000000000-CWNB3:1:2110:6942:19300	LN537526.1	94.626	428	21	2	1	427	1	427	0	662	Bacteria_NA_NA_NA_NA_NA_uncultured bacterium		PVIL-merged-M01780:105:000000000-CWNB3:1:2102:15344:19838	AY969012.1	97.512	402	10	0	1	402	311	712	0	688	Bacteria_Proteobacteria_Alphaproteobacteria_Rickettsiales_Anaplasmataceae_Anaplasma_Anaplasma phagocytophilum
NWSE-merged-M01780:105:000000000-CWNB3:1:2109:9579:2612	KF247878.1	97.163	423	11	1	1	422	352	774	0	713	Bacteria_NA_NA_NA_NA_NA_uncultured bacterium		PVIL-merged-M01780:105:000000000-CWNB3:1:2102:19205:23988	MK239931.1	100	402	0	0	1	402	257	658	0	743	Bacteria_Proteobacteria_Alphaproteobacteria_Rickettsiales_Anaplasmataceae_Anaplasma_Anaplasma phagocytophilum
NWSE-merged-M01780:105:000000000-CWNB3:1:2116:27424:17781	EF074243.1	98.756	402	5	0	1	402	271	672	0	715	Bacteria_NA_NA_NA_NA_NA_uncultured bacterium		PVIL-merged-M01780:105:000000000-CWNB3:1:2105:10225:2748	MK239931.1	100	402	0	0	1	402	257	658	0	743	Bacteria_Proteobacteria_Alphaproteobacteria_Rickettsiales_Anaplasmataceae_Anaplasma_Anaplasma phagocytophilum
NWSE-merged-M01780:105:000000000-CWNB3:1:1101:24062:6184	AB656108.1	99.766	428	1	0	1	428	340	767	0	785	Bacteria_NA_NA_NA_NA_NA_uncultured bacterium		PVIL-merged-M01780:105:000000000-CWNB3:1:2104:12922:17052	MK239931.1	100	402	0	0	1	402	257	658	0	743	Bacteria_Proteobacteria_Alphaproteobacteria_Rickettsiales_Anaplasmataceae_Anaplasma_Anaplasma phagocytophilum
NWSE-merged-M01780:105:000000000-CWNB3:1:1106:23520:18119	AB658245.1	98.578	422	6	0	1	422	326	747	0	747	Bacteria_NA_NA_NA_NA_NA_uncultured bacterium		PVIL-merged-M01780:105:000000000-CWNB3:1:2107:6439:8920	AY969012.1	96.517	402	14	0	1	402	311	712	0	667	Bacteria_Proteobacteria_Alphaproteobacteria_Rickettsiales_Anaplasmataceae_Anaplasma_Anaplasma phagocytophilum
NWSE-merged-M01780:105:000000000-CWNB3:1:1114:10332:24638	LK025655.2	95.761	401	15	2	1	400	341	740	0	647	Bacteria_NA_NA_NA_NA_NA_uncultured bacterium		PVIL-merged-M01780:105:000000000-CWNB3:1:2106:29029:13218	MK239931.1	99.751	402	1	0	1	402	257	658	0	737	Bacteria_Proteobacteria_Alphaproteobacteria_Rickettsiales_Anaplasmataceae_Anaplasma_Anaplasma phagocytophilum
NWSE-merged-M01780:105:000000000-CWNB3:1:2101:7908:14661	EF208594.1	87.678	422	26	14	4	402	4	422	1.12e-127	468	Bacteria_NA_NA_NA_NA_NA_uncultured bacterium		PVIL-merged-M01780:105:000000000-CWNB3:1:2109:17205:19997	AY969012.1	94.802	404	17	3	1	402	311	712	1.75e-175	627	Bacteria_Proteobacteria_Alphaproteobacteria_Rickettsiales_Anaplasmataceae_Anaplasma_Anaplasma phagocytophilum
NWSE-merged-M01780:105:000000000-CWNB3:1:2107:24100:11976	KF598756.1	97.794	408	9	0	1	408	313	720	0	704	Bacteria_NA_NA_NA_NA_NA_uncultured bacterium		PVIL-merged-M01780:105:000000000-CWNB3:1:2109:18464:6723	AY969012.1	94.802	404	17	3	1	402	311	712	1.75e-175	627	Bacteria_Proteobacteria_Alphaproteobacteria_Rickettsiales_Anaplasmataceae_Anaplasma_Anaplasma phagocytophilum
NWSE-merged-M01780:105:000000000-CWNB3:1:2113:27654:12987	KU382131.1	98.765	405	5	0	1	405	277	681	0	721	Bacteria_NA_NA_NA_NA_NA_uncultured bacterium		PVIL-merged-M01780:105:000000000-CWNB3:1:2111:9893:17253	MK239931.1	100	402	0	0	1	402	257	658	0	743	Bacteria_Proteobacteria_Alphaproteobacteria_Rickettsiales_Anaplasmataceae_Anaplasma_Anaplasma phagocytophilum
NWSE-merged-M01780:105:000000000-CWNB3:1:2116:12806:11286	LR643369.1	100	422	0	0	1	422	332	753	0	780	Bacteria_NA_NA_NA_NA_NA_uncultured bacterium		PVIL-merged-M01780:105:000000000-CWNB3:1:2113:20409:15039	MK239931.1	100	402	0	0	1	402	257	658	0	743	Bacteria_Proteobacteria_Alphaproteobacteria_Rickettsiales_Anaplasmataceae_Anaplasma_Anaplasma phagocytophilum
NWSE-merged-M01780:105:000000000-CWNB3:1:1110:22712:9490	EF074243.1	99.005	402	4	0	1	402	271	672	0	721	Bacteria_NA_NA_NA_NA_NA_uncultured bacterium		PVIL-merged-M01780:105:000000000-CWNB3:1:2119:23876:22050	MK239931.1	99.751	402	1	0	1	402	257	658	0	737	Bacteria_Proteobacteria_Alphaproteobacteria_Rickettsiales_Anaplasmataceae_Anaplasma_Anaplasma phagocytophilum
NWSE-merged-M01780:105:000000000-CWNB3:1:1113:27544:15920	KF598756.1	98.756	402	5	0	1	402	313	714	0	715	Bacteria_NA_NA_NA_NA_NA_uncultured bacterium		PVIL-merged-M01780:105:000000000-CWNB3:1:1105:6315:10295	MK239931.1	100	402	0	0	1	402	257	658	0	743	Bacteria_Proteobacteria_Alphaproteobacteria_Rickettsiales_Anaplasmataceae_Anaplasma_Anaplasma phagocytophilum
NWSE-merged-M01780:105:000000000-CWNB3:1:2110:23672:19306	AB656108.1	98.598	428	6	0	1	428	340	767	0	758	Bacteria_NA_NA_NA_NA_NA_uncultured bacterium		PVIL-merged-M01780:105:000000000-CWNB3:1:1108:5203:12506	MK239931.1	100	402	0	0	1	402	257	658	0	743	Bacteria_Proteobacteria_Alphaproteobacteria_Rickettsiales_Anaplasmataceae_Anaplasma_Anaplasma phagocytophilum
NWSE-merged-M01780:105:000000000-CWNB3:1:1113:12856:15923	AB630573.1	88.67	406	42	4	1	404	311	714	6.69e-135	492	Bacteria_NA_NA_NA_NA_NA_uncultured bacterium		PVIL-merged-M01780:105:000000000-CWNB3:1:1110:10580:19315	MK239931.1	100	402	0	0	1	402	257	658	0	743	Bacteria_Proteobacteria_Alphaproteobacteria_Rickettsiales_Anaplasmataceae_Anaplasma_Anaplasma phagocytophilum
NWSE-merged-M01780:105:000000000-CWNB3:1:1114:23173:17928	KY691318.1	98.01	402	8	0	1	402	18	419	0	699	Bacteria_NA_NA_NA_NA_NA_uncultured bacterium		PVIL-merged-M01780:105:000000000-CWNB3:1:1112:15754:13327	MK239931.1	100	402	0	0	1	402	257	658	0	743	Bacteria_Proteobacteria_Alphaproteobacteria_Rickettsiales_Anaplasmataceae_Anaplasma_Anaplasma phagocytophilum
NWSE-merged-M01780:105:000000000-CWNB3:1:1110:15730:12595	LR643369.1	99.763	422	1	0	1	422	332	753	0	774	Bacteria_NA_NA_NA_NA_NA_uncultured bacterium		PVIL-merged-M01780:105:000000000-CWNB3:1:1114:11839:9762	MK239931.1	99.751	402	1	0	1	402	257	658	0	737	Bacteria_Proteobacteria_Alphaproteobacteria_Rickettsiales_Anaplasmataceae_Anaplasma_Anaplasma phagocytophilum
NWSE-merged-M01780:105:000000000-CWNB3:1:2113:9178:12665	AB630573.1	89.383	405	41	2	1	404	311	714	6.64e-140	508	Bacteria_NA_NA_NA_NA_NA_uncultured bacterium		PVIL-merged-M01780:105:000000000-CWNB3:1:1112:20054:8129	MK239931.1	100	402	0	0	1	402	257	658	0	743	Bacteria_Proteobacteria_Alphaproteobacteria_Rickettsiales_Anaplasmataceae_Anaplasma_Anaplasma phagocytophilum
NWSE-merged-M01780:105:000000000-CWNB3:1:1118:24136:21167	LR638932.1	99.752	403	1	0	1	403	334	736	0	739	Bacteria_NA_NA_NA_NA_NA_uncultured bacterium		PVIL-merged-M01780:105:000000000-CWNB3:1:1112:20423:24247	MK239931.1	99.502	402	2	0	1	402	257	658	0	732	Bacteria_Proteobacteria_Alphaproteobacteria_Rickettsiales_Anaplasmataceae_Anaplasma_Anaplasma phagocytophilum
NWSE-merged-M01780:105:000000000-CWNB3:1:2112:6308:15089	JQ460282.1	99.289	422	3	0	1	422	359	780	0	763	Bacteria_NA_NA_NA_NA_NA_uncultured bacterium		PVIL-merged-M01780:105:000000000-CWNB3:1:1115:12200:9939	MK239931.1	99.751	402	1	0	1	402	257	658	0	737	Bacteria_Proteobacteria_Alphaproteobacteria_Rickettsiales_Anaplasmataceae_Anaplasma_Anaplasma phagocytophilum
NWSE-merged-M01780:105:000000000-CWNB3:1:1102:13145:19924	AB630573.1	89.901	406	37	4	1	404	311	714	3.07e-143	520	Bacteria_NA_NA_NA_NA_NA_uncultured bacterium		PVIL-merged-M01780:105:000000000-CWNB3:1:1117:12541:19451	MK239931.1	99.267	409	1	2	1	408	257	664	0	737	Bacteria_Proteobacteria_Alphaproteobacteria_Rickettsiales_Anaplasmataceae_Anaplasma_Anaplasma phagocytophilum
NWSE-merged-M01780:105:000000000-CWNB3:1:1110:26627:8421	LC355627.1	99.766	427	1	0	1	427	1	427	0	784	Bacteria_NA_NA_NA_NA_NA_uncultured bacterium		PVIL-merged-M01780:105:000000000-CWNB3:1:2101:21337:18868	MK239931.1	100	402	0	0	1	402	257	658	0	743	Bacteria_Proteobacteria_Alphaproteobacteria_Rickettsiales_Anaplasmataceae_Anaplasma_Anaplasma phagocytophilum
NWSE-merged-M01780:105:000000000-CWNB3:1:1113:25578:13853	LN563865.1	99.525	421	2	0	1	421	303	723	0	767	Bacteria_NA_NA_NA_NA_NA_uncultured bacterium		PVIL-merged-M01780:105:000000000-CWNB3:1:2107:18599:17949	MN227385.1	97.015	402	12	0	1	402	64	465	0	676	Bacteria_Proteobacteria_Alphaproteobacteria_Rickettsiales_Anaplasmataceae_Anaplasma_Anaplasma phagocytophilum
NWSE-merged-M01780:105:000000000-CWNB3:1:1117:16301:21839	LR638932.1	100	403	0	0	1	403	334	736	0	745	Bacteria_NA_NA_NA_NA_NA_uncultured bacterium		PVIL-merged-M01780:105:000000000-CWNB3:1:2110:22178:6556	MK239931.1	99.254	402	3	0	1	402	257	658	0	726	Bacteria_Proteobacteria_Alphaproteobacteria_Rickettsiales_Anaplasmataceae_Anaplasma_Anaplasma phagocytophilum
NWSE-merged-M01780:105:000000000-CWNB3:1:1109:19854:10937	AB658245.1	99.052	422	4	0	1	422	326	747	0	758	Bacteria_NA_NA_NA_NA_NA_uncultured bacterium		PVIL-merged-M01780:105:000000000-CWNB3:1:2114:10437:13590	MN227385.1	97.264	402	11	0	1	402	64	465	0	682	Bacteria_Proteobacteria_Alphaproteobacteria_Rickettsiales_Anaplasmataceae_Anaplasma_Anaplasma phagocytophilum
NWSE-merged-M01780:105:000000000-CWNB3:1:1115:16574:17127	KF110369.1	99.754	407	1	0	1	407	329	735	0	747	Bacteria_NA_NA_NA_NA_NA_uncultured bacterium		PVIL-merged-M01780:105:000000000-CWNB3:1:2117:25996:12511	MK239931.1	99.751	402	1	0	1	402	257	658	0	737	Bacteria_Proteobacteria_Alphaproteobacteria_Rickettsiales_Anaplasmataceae_Anaplasma_Anaplasma phagocytophilum
NWSE-merged-M01780:105:000000000-CWNB3:1:2106:21226:16184	AY600928.1	96.667	420	14	0	1	420	18	437	0	699	Bacteria_NA_NA_NA_NA_NA_uncultured bacterium		PVIL-merged-M01780:105:000000000-CWNB3:1:2118:8177:14471	MK239931.1	100	402	0	0	1	402	257	658	0	743	Bacteria_Proteobacteria_Alphaproteobacteria_Rickettsiales_Anaplasmataceae_Anaplasma_Anaplasma phagocytophilum
NWSE-merged-M01780:105:000000000-CWNB3:1:2115:15059:18077	LR643369.1	100	422	0	0	1	422	332	753	0	780	Bacteria_NA_NA_NA_NA_NA_uncultured bacterium		PVIL-merged-M01780:105:000000000-CWNB3:1:2119:8961:5162	MK239931.1	99.502	402	2	0	1	402	257	658	0	732	Bacteria_Proteobacteria_Alphaproteobacteria_Rickettsiales_Anaplasmataceae_Anaplasma_Anaplasma phagocytophilum
NWSE-merged-M01780:105:000000000-CWNB3:1:1101:14294:6038	JQ380822.2	99.256	403	3	0	1	403	333	735	0	728	Bacteria_NA_NA_NA_NA_NA_uncultured bacterium		PVIL-merged-M01780:105:000000000-CWNB3:1:1106:17404:7027	MK239931.1	100	402	0	0	1	402	257	658	0	743	Bacteria_Proteobacteria_Alphaproteobacteria_Rickettsiales_Anaplasmataceae_Anaplasma_Anaplasma phagocytophilum
NWSE-merged-M01780:105:000000000-CWNB3:1:2111:16416:18272	KU382131.1	99.012	405	4	0	1	405	277	681	0	726	Bacteria_NA_NA_NA_NA_NA_uncultured bacterium		PVIL-merged-M01780:105:000000000-CWNB3:1:1109:13950:4978	MK239931.1	100	402	0	0	1	402	257	658	0	743	Bacteria_Proteobacteria_Alphaproteobacteria_Rickettsiales_Anaplasmataceae_Anaplasma_Anaplasma phagocytophilum
NWSE-merged-M01780:105:000000000-CWNB3:1:2118:20088:7703	MG101063.1	100	402	0	0	1	402	17	418	0	743	Bacteria_NA_NA_NA_NA_NA_uncultured bacterium		PVIL-merged-M01780:105:000000000-CWNB3:1:1114:3051:15558	MK239931.1	100	402	0	0	1	402	257	658	0	743	Bacteria_Proteobacteria_Alphaproteobacteria_Rickettsiales_Anaplasmataceae_Anaplasma_Anaplasma phagocytophilum
NWSE-merged-M01780:105:000000000-CWNB3:1:1107:16590:15327	JQ460282.1	99.763	422	1	0	1	422	359	780	0	774	Bacteria_NA_NA_NA_NA_NA_uncultured bacterium		PVIL-merged-M01780:105:000000000-CWNB3:1:1115:17974:17357	MK239931.1	99.751	402	1	0	1	402	257	658	0	737	Bacteria_Proteobacteria_Alphaproteobacteria_Rickettsiales_Anaplasmataceae_Anaplasma_Anaplasma phagocytophilum
NWSE-merged-M01780:105:000000000-CWNB3:1:1119:6196:6473	KF598756.1	93.58	405	26	0	1	405	313	717	8.28e-169	604	Bacteria_NA_NA_NA_NA_NA_uncultured bacterium		PVIL-merged-M01780:105:000000000-CWNB3:1:1116:15095:9524	MK239931.1	99.751	402	1	0	1	402	257	658	0	737	Bacteria_Proteobacteria_Alphaproteobacteria_Rickettsiales_Anaplasmataceae_Anaplasma_Anaplasma phagocytophilum
NWSE-merged-M01780:105:000000000-CWNB3:1:1102:15415:21207	MG804606.1	96.782	404	9	4	1	402	20	421	0	671	Bacteria_NA_NA_NA_NA_NA_uncultured bacterium		PVIL-merged-M01780:105:000000000-CWNB3:1:1117:14548:5458	MK239931.1	99.254	402	3	0	1	402	257	658	0	726	Bacteria_Proteobacteria_Alphaproteobacteria_Rickettsiales_Anaplasmataceae_Anaplasma_Anaplasma phagocytophilum
NWSE-merged-M01780:105:000000000-CWNB3:1:1118:25929:9300	KM185152.1	99.254	402	3	0	1	402	18	419	0	726	Bacteria_NA_NA_NA_NA_NA_uncultured bacterium		PVIL-merged-M01780:105:000000000-CWNB3:1:1118:23458:8016	MK239931.1	100	402	0	0	1	402	257	658	0	743	Bacteria_Proteobacteria_Alphaproteobacteria_Rickettsiales_Anaplasmataceae_Anaplasma_Anaplasma phagocytophilum
NWSE-merged-M01780:105:000000000-CWNB3:1:2118:19898:8710	KY691774.1	99.256	403	3	0	1	403	18	420	0	728	Bacteria_NA_NA_NA_NA_NA_uncultured bacterium		PVIL-merged-M01780:105:000000000-CWNB3:1:1119:16692:14793	MK239931.1	100	402	0	0	1	402	257	658	0	743	Bacteria_Proteobacteria_Alphaproteobacteria_Rickettsiales_Anaplasmataceae_Anaplasma_Anaplasma phagocytophilum
NWSE-merged-M01780:105:000000000-CWNB3:1:1107:20294:15215	KF247878.1	97.872	423	8	1	1	422	352	774	0	730	Bacteria_NA_NA_NA_NA_NA_uncultured bacterium		PVIL-merged-M01780:105:000000000-CWNB3:1:2102:18070:2796	MK239931.1	100	402	0	0	1	402	257	658	0	743	Bacteria_Proteobacteria_Alphaproteobacteria_Rickettsiales_Anaplasmataceae_Anaplasma_Anaplasma phagocytophilum
NWSE-merged-M01780:105:000000000-CWNB3:1:2111:22371:24114	LR643369.1	100	422	0	0	1	422	332	753	0	780	Bacteria_NA_NA_NA_NA_NA_uncultured bacterium		PVIL-merged-M01780:105:000000000-CWNB3:1:2106:17530:6438	MK239931.1	99.751	402	1	0	1	402	257	658	0	737	Bacteria_Proteobacteria_Alphaproteobacteria_Rickettsiales_Anaplasmataceae_Anaplasma_Anaplasma phagocytophilum
NWSE-merged-M01780:105:000000000-CWNB3:1:2115:24310:19677	KY691774.1	89.514	391	36	5	15	402	32	420	2.39e-134	490	Bacteria_NA_NA_NA_NA_NA_uncultured bacterium		PVIL-merged-M01780:105:000000000-CWNB3:1:2110:4623:15640	MK239931.1	99.751	402	1	0	1	402	257	658	0	737	Bacteria_Proteobacteria_Alphaproteobacteria_Rickettsiales_Anaplasmataceae_Anaplasma_Anaplasma phagocytophilum
NWSE-merged-M01780:105:000000000-CWNB3:1:1105:18517:3846	LN563865.1	98.812	421	5	0	1	421	303	723	0	750	Bacteria_NA_NA_NA_NA_NA_uncultured bacterium		PVIL-merged-M01780:105:000000000-CWNB3:1:2110:14270:8305	MK239931.1	99.005	402	4	0	1	402	257	658	0	721	Bacteria_Proteobacteria_Alphaproteobacteria_Rickettsiales_Anaplasmataceae_Anaplasma_Anaplasma phagocytophilum
NWSE-merged-M01780:105:000000000-CWNB3:1:1104:23274:10804	LR638932.1	100	403	0	0	1	403	334	736	0	745	Bacteria_NA_NA_NA_NA_NA_uncultured bacterium		PVIL-merged-M01780:105:000000000-CWNB3:1:2113:23684:9943	MK239931.1	99.751	402	1	0	1	402	257	658	0	737	Bacteria_Proteobacteria_Alphaproteobacteria_Rickettsiales_Anaplasmataceae_Anaplasma_Anaplasma phagocytophilum
NWSE-merged-M01780:105:000000000-CWNB3:1:1104:14771:22425	MG284665.1	96.226	424	16	0	1	424	1	424	0	695	Bacteria_NA_NA_NA_NA_NA_uncultured bacterium		PVIL-merged-M01780:105:000000000-CWNB3:1:2111:22318:11091	MK239931.1	100	402	0	0	1	402	257	658	0	743	Bacteria_Proteobacteria_Alphaproteobacteria_Rickettsiales_Anaplasmataceae_Anaplasma_Anaplasma phagocytophilum
NWSE-merged-M01780:105:000000000-CWNB3:1:1109:14926:8504	MH525291.1	95.093	428	17	3	1	426	1	426	0	671	Bacteria_NA_NA_NA_NA_NA_uncultured bacterium		PVIL-merged-M01780:105:000000000-CWNB3:1:2111:23756:5567	MK239931.1	100	402	0	0	1	402	257	658	0	743	Bacteria_Proteobacteria_Alphaproteobacteria_Rickettsiales_Anaplasmataceae_Anaplasma_Anaplasma phagocytophilum
NWSE-merged-M01780:105:000000000-CWNB3:1:2113:18133:19674	EU644339.1	98.091	419	8	0	1	419	352	770	0	730	Bacteria_NA_NA_NA_NA_NA_uncultured bacterium		PVIL-merged-M01780:105:000000000-CWNB3:1:2117:8386:5638	MK239931.1	100	402	0	0	1	402	257	658	0	743	Bacteria_Proteobacteria_Alphaproteobacteria_Rickettsiales_Anaplasmataceae_Anaplasma_Anaplasma phagocytophilum
NWSE-merged-M01780:105:000000000-CWNB3:1:1102:11455:19943	KF104543.1	96.028	428	15	2	1	427	338	764	0	695	Bacteria_NA_NA_NA_NA_NA_uncultured bacterium		PVIL-merged-M01780:105:000000000-CWNB3:1:2117:4593:19312	MK239931.1	99.254	402	3	0	1	402	257	658	0	726	Bacteria_Proteobacteria_Alphaproteobacteria_Rickettsiales_Anaplasmataceae_Anaplasma_Anaplasma phagocytophilum
NWSE-merged-M01780:105:000000000-CWNB3:1:1101:15732:1714	KF494595.1	95.316	427	19	1	1	427	346	771	0	676	Bacteria_NA_NA_NA_NA_NA_uncultured bacterium		PVIL-merged-M01780:105:000000000-CWNB3:1:1103:23665:5339	MK239931.1	99.751	402	1	0	1	402	257	658	0	737	Bacteria_Proteobacteria_Alphaproteobacteria_Rickettsiales_Anaplasmataceae_Anaplasma_Anaplasma phagocytophilum
NWSE-merged-M01780:105:000000000-CWNB3:1:1103:17774:16101	LR638932.1	100	403	0	0	1	403	334	736	0	745	Bacteria_NA_NA_NA_NA_NA_uncultured bacterium		PVIL-merged-M01780:105:000000000-CWNB3:1:1102:21719:4467	MK239931.1	100	402	0	0	1	402	257	658	0	743	Bacteria_Proteobacteria_Alphaproteobacteria_Rickettsiales_Anaplasmataceae_Anaplasma_Anaplasma phagocytophilum
NWSE-merged-M01780:105:000000000-CWNB3:1:1107:5731:15683	LK025655.2	93.467	398	26	0	1	398	341	738	1.78e-165	593	Bacteria_NA_NA_NA_NA_NA_uncultured bacterium		PVIL-merged-M01780:105:000000000-CWNB3:1:1101:16496:10058	MK239931.1	100	402	0	0	1	402	257	658	0	743	Bacteria_Proteobacteria_Alphaproteobacteria_Rickettsiales_Anaplasmataceae_Anaplasma_Anaplasma phagocytophilum
NWSE-merged-M01780:105:000000000-CWNB3:1:2110:20154:10180	KP947988.1	90.323	403	37	2	1	402	21	422	1.82e-145	527	Bacteria_NA_NA_NA_NA_NA_uncultured bacterium		PVIL-merged-M01780:105:000000000-CWNB3:1:1102:28444:14373	MK239931.1	100	402	0	0	1	402	257	658	0	743	Bacteria_Proteobacteria_Alphaproteobacteria_Rickettsiales_Anaplasmataceae_Anaplasma_Anaplasma phagocytophilum
NWSE-merged-M01780:105:000000000-CWNB3:1:2117:9174:13294	AB630573.1	89.901	406	37	4	1	404	311	714	3.07e-143	520	Bacteria_NA_NA_NA_NA_NA_uncultured bacterium		PVIL-merged-M01780:105:000000000-CWNB3:1:1104:13585:22398	MK239931.1	100	402	0	0	1	402	257	658	0	743	Bacteria_Proteobacteria_Alphaproteobacteria_Rickettsiales_Anaplasmataceae_Anaplasma_Anaplasma phagocytophilum
NWSE-merged-M01780:105:000000000-CWNB3:1:1117:15308:17318	MH525291.1	96.934	424	13	0	4	427	4	427	0	712	Bacteria_NA_NA_NA_NA_NA_uncultured bacterium		PVIL-merged-M01780:105:000000000-CWNB3:1:1110:27564:9245	MK239931.1	100	402	0	0	1	402	257	658	0	743	Bacteria_Proteobacteria_Alphaproteobacteria_Rickettsiales_Anaplasmataceae_Anaplasma_Anaplasma phagocytophilum
NWSE-merged-M01780:105:000000000-CWNB3:1:2110:26576:12611	MG101063.1	99.751	402	1	0	1	402	17	418	0	737	Bacteria_NA_NA_NA_NA_NA_uncultured bacterium		PVIL-merged-M01780:105:000000000-CWNB3:1:1114:4278:5386	MK239931.1	99.005	402	4	0	1	402	257	658	0	721	Bacteria_Proteobacteria_Alphaproteobacteria_Rickettsiales_Anaplasmataceae_Anaplasma_Anaplasma phagocytophilum
NWSE-merged-M01780:105:000000000-CWNB3:1:2109:28236:13535	LR638932.1	99.752	403	0	1	1	402	334	736	0	737	Bacteria_NA_NA_NA_NA_NA_uncultured bacterium		PVIL-merged-M01780:105:000000000-CWNB3:1:1115:8618:9195	MK239931.1	99.254	402	3	0	1	402	257	658	0	726	Bacteria_Proteobacteria_Alphaproteobacteria_Rickettsiales_Anaplasmataceae_Anaplasma_Anaplasma phagocytophilum
NWSE-merged-M01780:105:000000000-CWNB3:1:2113:21048:14322	KM185152.1	99.254	402	3	0	1	402	18	419	0	726	Bacteria_NA_NA_NA_NA_NA_uncultured bacterium		PVIL-merged-M01780:105:000000000-CWNB3:1:1113:12244:23461	MK239931.1	100	402	0	0	1	402	257	658	0	743	Bacteria_Proteobacteria_Alphaproteobacteria_Rickettsiales_Anaplasmataceae_Anaplasma_Anaplasma phagocytophilum
NWSE-merged-M01780:105:000000000-CWNB3:1:2117:25071:18389	KM185152.1	99.254	402	3	0	1	402	18	419	0	726	Bacteria_NA_NA_NA_NA_NA_uncultured bacterium		PVIL-merged-M01780:105:000000000-CWNB3:1:1118:24146:7392	MK239931.1	100	402	0	0	1	402	257	658	0	743	Bacteria_Proteobacteria_Alphaproteobacteria_Rickettsiales_Anaplasmataceae_Anaplasma_Anaplasma phagocytophilum
NWSE-merged-M01780:105:000000000-CWNB3:1:1113:16302:18345	JQ460282.1	99.763	422	1	0	1	422	359	780	0	774	Bacteria_NA_NA_NA_NA_NA_uncultured bacterium		PVIL-merged-M01780:105:000000000-CWNB3:1:1119:12625:23807	MK239931.1	100	402	0	0	1	402	257	658	0	743	Bacteria_Proteobacteria_Alphaproteobacteria_Rickettsiales_Anaplasmataceae_Anaplasma_Anaplasma phagocytophilum
NWSE-merged-M01780:105:000000000-CWNB3:1:1114:13556:9211	LN563865.1	99.525	421	2	0	1	421	303	723	0	767	Bacteria_NA_NA_NA_NA_NA_uncultured bacterium		PVIL-merged-M01780:105:000000000-CWNB3:1:2107:23270:10666	AY969012.1	96.517	402	14	0	1	402	311	712	0	665	Bacteria_Proteobacteria_Alphaproteobacteria_Rickettsiales_Anaplasmataceae_Anaplasma_Anaplasma phagocytophilum
NWSE-merged-M01780:105:000000000-CWNB3:1:1104:7125:5541	HM010799.1	99.502	402	2	0	1	402	301	702	0	732	Bacteria_NA_NA_NA_NA_NA_uncultured bacterium		PVIL-merged-M01780:105:000000000-CWNB3:1:2111:6189:14844	MK239931.1	98.756	402	5	0	1	402	257	658	0	715	Bacteria_Proteobacteria_Alphaproteobacteria_Rickettsiales_Anaplasmataceae_Anaplasma_Anaplasma phagocytophilum
NWSE-merged-M01780:105:000000000-CWNB3:1:2111:3205:13273	KM185152.1	98.01	402	8	0	1	402	18	419	0	699	Bacteria_NA_NA_NA_NA_NA_uncultured bacterium		PVIL-merged-M01780:105:000000000-CWNB3:1:2112:17307:15235	MK239931.1	99.751	402	1	0	1	402	257	658	0	737	Bacteria_Proteobacteria_Alphaproteobacteria_Rickettsiales_Anaplasmataceae_Anaplasma_Anaplasma phagocytophilum
NWSE-merged-M01780:105:000000000-CWNB3:1:1103:22999:8184	KY691318.1	99.751	402	1	0	1	402	18	419	0	737	Bacteria_NA_NA_NA_NA_NA_uncultured bacterium		PVIL-merged-M01780:105:000000000-CWNB3:1:2110:19094:14088	MK239931.1	100	402	0	0	1	402	257	658	0	743	Bacteria_Proteobacteria_Alphaproteobacteria_Rickettsiales_Anaplasmataceae_Anaplasma_Anaplasma phagocytophilum
NWSE-merged-M01780:105:000000000-CWNB3:1:2106:28347:10335	LR638932.1	97.767	403	9	0	1	403	334	736	0	695	Bacteria_NA_NA_NA_NA_NA_uncultured bacterium		PVIL-merged-M01780:105:000000000-CWNB3:1:2116:28268:14045	MK239931.1	99.751	402	1	0	1	402	257	658	0	737	Bacteria_Proteobacteria_Alphaproteobacteria_Rickettsiales_Anaplasmataceae_Anaplasma_Anaplasma phagocytophilum
NWSE-merged-M01780:105:000000000-CWNB3:1:1107:18015:4864	AB630573.1	89.655	406	38	4	1	404	311	714	1.43e-141	514	Bacteria_NA_NA_NA_NA_NA_uncultured bacterium		PVIL-merged-M01780:105:000000000-CWNB3:1:2115:18826:5242	MK239931.1	99.751	402	1	0	1	402	257	658	0	737	Bacteria_Proteobacteria_Alphaproteobacteria_Rickettsiales_Anaplasmataceae_Anaplasma_Anaplasma phagocytophilum
NWSE-merged-M01780:105:000000000-CWNB3:1:1116:13840:15354	AB630573.1	89.901	406	37	4	1	404	311	714	3.07e-143	520	Bacteria_NA_NA_NA_NA_NA_uncultured bacterium		PVIL-merged-M01780:105:000000000-CWNB3:1:2115:13858:19439	MK239931.1	99.751	402	1	0	1	402	257	658	0	737	Bacteria_Proteobacteria_Alphaproteobacteria_Rickettsiales_Anaplasmataceae_Anaplasma_Anaplasma phagocytophilum
NWSE-merged-M01780:105:000000000-CWNB3:1:1108:22738:10246	AB630573.1	89.901	406	37	4	1	404	311	714	3.07e-143	520	Bacteria_NA_NA_NA_NA_NA_uncultured bacterium		PVIL-merged-M01780:105:000000000-CWNB3:1:1104:4287:8906	MK239931.1	99.254	402	3	0	1	402	257	658	0	726	Bacteria_Proteobacteria_Alphaproteobacteria_Rickettsiales_Anaplasmataceae_Anaplasma_Anaplasma phagocytophilum
NWSE-merged-M01780:105:000000000-CWNB3:1:1104:13614:14865	JQ460282.1	95.972	422	17	0	1	422	359	780	0	686	Bacteria_NA_NA_NA_NA_NA_uncultured bacterium		PVIL-merged-M01780:105:000000000-CWNB3:1:1102:12525:8300	MK239931.1	100	402	0	0	1	402	257	658	0	743	Bacteria_Proteobacteria_Alphaproteobacteria_Rickettsiales_Anaplasmataceae_Anaplasma_Anaplasma phagocytophilum
NWSE-merged-M01780:105:000000000-CWNB3:1:1114:7375:9761	MG284665.1	96.226	424	16	0	1	424	1	424	0	695	Bacteria_NA_NA_NA_NA_NA_uncultured bacterium		PVIL-merged-M01780:105:000000000-CWNB3:1:1102:23081:13511	MK239931.1	100	402	0	0	1	402	257	658	0	743	Bacteria_Proteobacteria_Alphaproteobacteria_Rickettsiales_Anaplasmataceae_Anaplasma_Anaplasma phagocytophilum
NWSE-merged-M01780:105:000000000-CWNB3:1:2109:2486:14887	AB630573.1	89.163	406	40	4	1	404	311	714	3.09e-138	503	Bacteria_NA_NA_NA_NA_NA_uncultured bacterium		PVIL-merged-M01780:105:000000000-CWNB3:1:1106:19166:6221	MK239931.1	98.259	402	7	0	1	402	257	658	0	704	Bacteria_Proteobacteria_Alphaproteobacteria_Rickettsiales_Anaplasmataceae_Anaplasma_Anaplasma phagocytophilum
NWSE-merged-M01780:105:000000000-CWNB3:1:2112:19551:9085	AB630573.1	88.916	406	41	4	1	404	311	714	1.44e-136	497	Bacteria_NA_NA_NA_NA_NA_uncultured bacterium		PVIL-merged-M01780:105:000000000-CWNB3:1:1107:22933:5836	MK239931.1	100	402	0	0	1	402	257	658	0	743	Bacteria_Proteobacteria_Alphaproteobacteria_Rickettsiales_Anaplasmataceae_Anaplasma_Anaplasma phagocytophilum
NWSE-merged-M01780:105:000000000-CWNB3:1:1106:26989:19535	LR643369.1	100	422	0	0	1	422	332	753	0	780	Bacteria_NA_NA_NA_NA_NA_uncultured bacterium		PVIL-merged-M01780:105:000000000-CWNB3:1:1111:23016:8292	MK239931.1	99.751	402	1	0	1	402	257	658	0	737	Bacteria_Proteobacteria_Alphaproteobacteria_Rickettsiales_Anaplasmataceae_Anaplasma_Anaplasma phagocytophilum
NWSE-merged-M01780:105:000000000-CWNB3:1:1116:4788:13771	KF072678.1	98.829	427	5	0	1	427	338	764	0	761	Bacteria_NA_NA_NA_NA_NA_uncultured bacterium		PVIL-merged-M01780:105:000000000-CWNB3:1:1110:21846:3592	MK239931.1	99.75	400	1	0	1	400	257	656	0	734	Bacteria_Proteobacteria_Alphaproteobacteria_Rickettsiales_Anaplasmataceae_Anaplasma_Anaplasma phagocytophilum
NWSE-merged-M01780:105:000000000-CWNB3:1:2112:6878:8098	LR638932.1	99.256	403	3	0	1	403	334	736	0	728	Bacteria_NA_NA_NA_NA_NA_uncultured bacterium		PVIL-merged-M01780:105:000000000-CWNB3:1:1110:20186:10794	MK239931.1	100	402	0	0	1	402	257	658	0	743	Bacteria_Proteobacteria_Alphaproteobacteria_Rickettsiales_Anaplasmataceae_Anaplasma_Anaplasma phagocytophilum
NWSE-merged-M01780:105:000000000-CWNB3:1:1110:19704:3571	KU382133.1	98.815	422	5	0	1	422	280	701	0	752	Bacteria_NA_NA_NA_NA_NA_uncultured bacterium		PVIL-merged-M01780:105:000000000-CWNB3:1:1110:4837:12618	MK239931.1	97.761	402	9	0	1	402	257	658	0	693	Bacteria_Proteobacteria_Alphaproteobacteria_Rickettsiales_Anaplasmataceae_Anaplasma_Anaplasma phagocytophilum
NWSE-merged-M01780:105:000000000-CWNB3:1:2104:16700:12362	LK025655.2	99.751	402	1	0	1	402	341	742	0	737	Bacteria_NA_NA_NA_NA_NA_uncultured bacterium		PVIL-merged-M01780:105:000000000-CWNB3:1:1115:18061:2878	MK239931.1	98.756	402	5	0	1	402	257	658	0	715	Bacteria_Proteobacteria_Alphaproteobacteria_Rickettsiales_Anaplasmataceae_Anaplasma_Anaplasma phagocytophilum
NWSE-merged-M01780:105:000000000-CWNB3:1:2110:27336:8739	KY691774.1	99.256	403	3	0	1	403	18	420	0	728	Bacteria_NA_NA_NA_NA_NA_uncultured bacterium		PVIL-merged-M01780:105:000000000-CWNB3:1:1116:23868:23613	MK239931.1	99.005	402	4	0	1	402	257	658	0	721	Bacteria_Proteobacteria_Alphaproteobacteria_Rickettsiales_Anaplasmataceae_Anaplasma_Anaplasma phagocytophilum
NWSE-merged-M01780:105:000000000-CWNB3:1:2112:28228:15952	KY691318.1	99.254	402	3	0	1	402	18	419	0	726	Bacteria_NA_NA_NA_NA_NA_uncultured bacterium		PVIL-merged-M01780:105:000000000-CWNB3:1:1118:9455:15903	MK239931.1	100	402	0	0	1	402	257	658	0	743	Bacteria_Proteobacteria_Alphaproteobacteria_Rickettsiales_Anaplasmataceae_Anaplasma_Anaplasma phagocytophilum
NWSE-merged-M01780:105:000000000-CWNB3:1:1106:9568:6486	KM185152.1	99.254	402	3	0	1	402	18	419	0	726	Bacteria_NA_NA_NA_NA_NA_uncultured bacterium		PVIL-merged-M01780:105:000000000-CWNB3:1:2102:12628:16517	MN227385.1	96.766	402	13	0	1	402	64	465	0	671	Bacteria_Proteobacteria_Alphaproteobacteria_Rickettsiales_Anaplasmataceae_Anaplasma_Anaplasma phagocytophilum
NWSE-merged-M01780:105:000000000-CWNB3:1:1106:25065:11748	MN503549.1	97.418	426	11	0	1	426	255	680	0	726	Bacteria_NA_NA_NA_NA_NA_uncultured bacterium		PVIL-merged-M01780:105:000000000-CWNB3:1:2106:12592:19429	MK239931.1	99.751	402	1	0	1	402	257	658	0	737	Bacteria_Proteobacteria_Alphaproteobacteria_Rickettsiales_Anaplasmataceae_Anaplasma_Anaplasma phagocytophilum
NWSE-merged-M01780:105:000000000-CWNB3:1:1114:16076:6071	KU382131.1	99.012	405	4	0	1	405	277	681	0	726	Bacteria_NA_NA_NA_NA_NA_uncultured bacterium		PVIL-merged-M01780:105:000000000-CWNB3:1:2109:7408:17014	AY969012.1	96.02	402	16	0	1	402	311	712	0	654	Bacteria_Proteobacteria_Alphaproteobacteria_Rickettsiales_Anaplasmataceae_Anaplasma_Anaplasma phagocytophilum
NWSE-merged-M01780:105:000000000-CWNB3:1:1116:5416:21714	MG284665.1	96.462	424	15	0	1	424	1	424	0	701	Bacteria_NA_NA_NA_NA_NA_uncultured bacterium		PVIL-merged-M01780:105:000000000-CWNB3:1:2108:27338:21003	MK239931.1	100	402	0	0	1	402	257	658	0	743	Bacteria_Proteobacteria_Alphaproteobacteria_Rickettsiales_Anaplasmataceae_Anaplasma_Anaplasma phagocytophilum
NWSE-merged-M01780:105:000000000-CWNB3:1:1105:9664:9617	MH525291.1	98.126	427	8	0	1	427	1	427	0	745	Bacteria_NA_NA_NA_NA_NA_uncultured bacterium		PVIL-merged-M01780:105:000000000-CWNB3:1:2111:10172:11488	MK239931.1	100	402	0	0	1	402	257	658	0	743	Bacteria_Proteobacteria_Alphaproteobacteria_Rickettsiales_Anaplasmataceae_Anaplasma_Anaplasma phagocytophilum
NWSE-merged-M01780:105:000000000-CWNB3:1:1106:17194:13504	KM185152.1	99.27	411	3	0	1	411	18	428	0	743	Bacteria_NA_NA_NA_NA_NA_uncultured bacterium		PVIL-merged-M01780:105:000000000-CWNB3:1:1103:11301:4335	MK239931.1	99.751	402	1	0	1	402	257	658	0	737	Bacteria_Proteobacteria_Alphaproteobacteria_Rickettsiales_Anaplasmataceae_Anaplasma_Anaplasma phagocytophilum
NWSE-merged-M01780:105:000000000-CWNB3:1:1108:9367:8548	KF598754.1	93.366	407	27	0	1	407	313	719	8.32e-169	604	Bacteria_NA_NA_NA_NA_NA_uncultured bacterium		PVIL-merged-M01780:105:000000000-CWNB3:1:1104:14889:14245	MK239931.1	99.751	402	1	0	1	402	257	658	0	737	Bacteria_Proteobacteria_Alphaproteobacteria_Rickettsiales_Anaplasmataceae_Anaplasma_Anaplasma phagocytophilum
NWSE-merged-M01780:105:000000000-CWNB3:1:2101:25541:19670	LN563865.1	98.1	421	8	0	1	421	303	723	0	734	Bacteria_NA_NA_NA_NA_NA_uncultured bacterium		PVIL-merged-M01780:105:000000000-CWNB3:1:1105:17493:23673	MK239931.1	100	402	0	0	1	402	257	658	0	743	Bacteria_Proteobacteria_Alphaproteobacteria_Rickettsiales_Anaplasmataceae_Anaplasma_Anaplasma phagocytophilum
NWSE-merged-M01780:105:000000000-CWNB3:1:2102:16026:21439	KM185152.1	98.507	402	6	0	1	402	18	419	0	710	Bacteria_NA_NA_NA_NA_NA_uncultured bacterium		PVIL-merged-M01780:105:000000000-CWNB3:1:1108:22149:17903	MK239931.1	100	402	0	0	1	402	257	658	0	743	Bacteria_Proteobacteria_Alphaproteobacteria_Rickettsiales_Anaplasmataceae_Anaplasma_Anaplasma phagocytophilum
NWSE-merged-M01780:105:000000000-CWNB3:1:2109:21112:13565	KM185152.1	99.254	402	3	0	1	402	18	419	0	726	Bacteria_NA_NA_NA_NA_NA_uncultured bacterium		PVIL-merged-M01780:105:000000000-CWNB3:1:1107:11436:5727	MK239931.1	99.502	402	2	0	1	402	257	658	0	732	Bacteria_Proteobacteria_Alphaproteobacteria_Rickettsiales_Anaplasmataceae_Anaplasma_Anaplasma phagocytophilum
NWSE-merged-M01780:105:000000000-CWNB3:1:1109:18607:18935	LR638932.1	99.256	403	3	0	1	403	334	736	0	728	Bacteria_NA_NA_NA_NA_NA_uncultured bacterium		PVIL-merged-M01780:105:000000000-CWNB3:1:1111:6751:10329	MK239931.1	99.751	402	1	0	1	402	257	658	0	737	Bacteria_Proteobacteria_Alphaproteobacteria_Rickettsiales_Anaplasmataceae_Anaplasma_Anaplasma phagocytophilum
NWSE-merged-M01780:105:000000000-CWNB3:1:2110:24393:8657	KP947988.1	90.323	403	37	2	1	402	21	422	1.82e-145	527	Bacteria_NA_NA_NA_NA_NA_uncultured bacterium		PVIL-merged-M01780:105:000000000-CWNB3:1:1117:27006:13403	MN227385.1	97.015	402	12	0	1	402	64	465	0	676	Bacteria_Proteobacteria_Alphaproteobacteria_Rickettsiales_Anaplasmataceae_Anaplasma_Anaplasma phagocytophilum
NWSE-merged-M01780:105:000000000-CWNB3:1:1104:15184:23351	KF494595.1	95.785	427	17	1	1	427	346	771	0	688	Bacteria_NA_NA_NA_NA_NA_uncultured bacterium		PVIL-merged-M01780:105:000000000-CWNB3:1:1116:10799:23988	MK239931.1	100	402	0	0	1	402	257	658	0	743	Bacteria_Proteobacteria_Alphaproteobacteria_Rickettsiales_Anaplasmataceae_Anaplasma_Anaplasma phagocytophilum
NWSE-merged-M01780:105:000000000-CWNB3:1:1110:4693:19156	LR638932.1	100	403	0	0	1	403	334	736	0	745	Bacteria_NA_NA_NA_NA_NA_uncultured bacterium		PVIL-merged-M01780:105:000000000-CWNB3:1:2108:22446:14143	MK239931.1	100	402	0	0	1	402	257	658	0	743	Bacteria_Proteobacteria_Alphaproteobacteria_Rickettsiales_Anaplasmataceae_Anaplasma_Anaplasma phagocytophilum
NWSE-merged-M01780:105:000000000-CWNB3:1:1114:7158:10643	KF598756.1	98.01	402	8	0	1	402	313	714	0	699	Bacteria_NA_NA_NA_NA_NA_uncultured bacterium		PVIL-merged-M01780:105:000000000-CWNB3:1:2111:20172:15672	MK239931.1	100	402	0	0	1	402	257	658	0	743	Bacteria_Proteobacteria_Alphaproteobacteria_Rickettsiales_Anaplasmataceae_Anaplasma_Anaplasma phagocytophilum
NWSE-merged-M01780:105:000000000-CWNB3:1:2105:22704:3932	JQ046439.1	98.259	402	7	0	1	402	281	682	0	704	Bacteria_NA_NA_NA_NA_NA_uncultured bacterium		PVIL-merged-M01780:105:000000000-CWNB3:1:2112:25474:4764	MK239931.1	99.751	402	1	0	1	402	257	658	0	737	Bacteria_Proteobacteria_Alphaproteobacteria_Rickettsiales_Anaplasmataceae_Anaplasma_Anaplasma phagocytophilum
NWSE-merged-M01780:105:000000000-CWNB3:1:2111:5679:7456	LR638932.1	99.504	403	2	0	1	403	334	736	0	734	Bacteria_NA_NA_NA_NA_NA_uncultured bacterium		PVIL-merged-M01780:105:000000000-CWNB3:1:2112:23272:7340	MK239931.1	100	402	0	0	1	402	257	658	0	743	Bacteria_Proteobacteria_Alphaproteobacteria_Rickettsiales_Anaplasmataceae_Anaplasma_Anaplasma phagocytophilum
NWSE-merged-M01780:105:000000000-CWNB3:1:2115:3012:12428	KU382131.1	99.012	405	4	0	1	405	277	681	0	726	Bacteria_NA_NA_NA_NA_NA_uncultured bacterium		PVIL-merged-M01780:105:000000000-CWNB3:1:2113:20152:12906	MK239931.1	100	402	0	0	1	402	257	658	0	743	Bacteria_Proteobacteria_Alphaproteobacteria_Rickettsiales_Anaplasmataceae_Anaplasma_Anaplasma phagocytophilum
NWSE-merged-M01780:105:000000000-CWNB3:1:1114:5329:4532	JQ460282.1	99.289	422	3	0	1	422	359	780	0	763	Bacteria_NA_NA_NA_NA_NA_uncultured bacterium		PVIL-merged-M01780:105:000000000-CWNB3:1:2115:2662:15026	MK239931.1	97.761	402	9	0	1	402	257	658	0	693	Bacteria_Proteobacteria_Alphaproteobacteria_Rickettsiales_Anaplasmataceae_Anaplasma_Anaplasma phagocytophilum
NWSE-merged-M01780:105:000000000-CWNB3:1:1116:8383:7895	LR638932.1	100	403	0	0	1	403	334	736	0	745	Bacteria_NA_NA_NA_NA_NA_uncultured bacterium		PVIL-merged-M01780:105:000000000-CWNB3:1:2118:24068:11118	MK239931.1	100	402	0	0	1	402	257	658	0	743	Bacteria_Proteobacteria_Alphaproteobacteria_Rickettsiales_Anaplasmataceae_Anaplasma_Anaplasma phagocytophilum
NWSE-merged-M01780:105:000000000-CWNB3:1:2114:13042:12337	KF598756.1	98.25	400	5	2	1	399	313	711	0	699	Bacteria_NA_NA_NA_NA_NA_uncultured bacterium		PVIL-merged-M01780:105:000000000-CWNB3:1:2118:7679:14447	MK239931.1	100	402	0	0	1	402	257	658	0	743	Bacteria_Proteobacteria_Alphaproteobacteria_Rickettsiales_Anaplasmataceae_Anaplasma_Anaplasma phagocytophilum
NWSE-merged-M01780:105:000000000-CWNB3:1:2119:11236:19076	MN503549.1	99.296	426	3	0	1	426	255	680	0	771	Bacteria_NA_NA_NA_NA_NA_uncultured bacterium		PVIL-merged-M01780:105:000000000-CWNB3:1:1103:21134:16489	MK239931.1	100	402	0	0	1	402	257	658	0	743	Bacteria_Proteobacteria_Alphaproteobacteria_Rickettsiales_Anaplasmataceae_Anaplasma_Anaplasma phagocytophilum
NWSE-merged-M01780:105:000000000-CWNB3:1:1106:5849:5573	LR638932.1	100	403	0	0	1	403	334	736	0	745	Bacteria_NA_NA_NA_NA_NA_uncultured bacterium		PVIL-merged-M01780:105:000000000-CWNB3:1:1105:16204:16099	MN227385.1	97.015	402	12	0	1	402	64	465	0	676	Bacteria_Proteobacteria_Alphaproteobacteria_Rickettsiales_Anaplasmataceae_Anaplasma_Anaplasma phagocytophilum
NWSE-merged-M01780:105:000000000-CWNB3:1:1107:7193:16069	FN566989.1	99.502	402	2	0	1	402	299	700	0	732	Bacteria_NA_NA_NA_NA_NA_uncultured bacterium		PVIL-merged-M01780:105:000000000-CWNB3:1:1104:8264:22403	MK239931.1	100	402	0	0	1	402	257	658	0	743	Bacteria_Proteobacteria_Alphaproteobacteria_Rickettsiales_Anaplasmataceae_Anaplasma_Anaplasma phagocytophilum
NWSE-merged-M01780:105:000000000-CWNB3:1:1119:16459:19460	AB630573.1	89.901	406	37	4	1	404	311	714	3.07e-143	520	Bacteria_NA_NA_NA_NA_NA_uncultured bacterium		PVIL-merged-M01780:105:000000000-CWNB3:1:1105:18260:7757	MK239931.1	100	402	0	0	1	402	257	658	0	743	Bacteria_Proteobacteria_Alphaproteobacteria_Rickettsiales_Anaplasmataceae_Anaplasma_Anaplasma phagocytophilum
NWSE-merged-M01780:105:000000000-CWNB3:1:2116:21739:21001	LK025655.2	98.756	402	5	0	1	402	341	742	0	715	Bacteria_NA_NA_NA_NA_NA_uncultured bacterium		PVIL-merged-M01780:105:000000000-CWNB3:1:1109:26777:16841	MK239931.1	100	402	0	0	1	402	257	658	0	743	Bacteria_Proteobacteria_Alphaproteobacteria_Rickettsiales_Anaplasmataceae_Anaplasma_Anaplasma phagocytophilum
NWSE-merged-M01780:105:000000000-CWNB3:1:1105:23802:16181	AB658245.1	99.052	422	4	0	1	422	326	747	0	758	Bacteria_NA_NA_NA_NA_NA_uncultured bacterium		PVIL-merged-M01780:105:000000000-CWNB3:1:1110:16187:9627	MK239931.1	100	402	0	0	1	402	257	658	0	743	Bacteria_Proteobacteria_Alphaproteobacteria_Rickettsiales_Anaplasmataceae_Anaplasma_Anaplasma phagocytophilum
NWSE-merged-M01780:105:000000000-CWNB3:1:1103:22198:16544	MH525291.1	98.829	427	5	0	1	427	1	427	0	761	Bacteria_NA_NA_NA_NA_NA_uncultured bacterium		PVIL-merged-M01780:105:000000000-CWNB3:1:1115:10471:21132	MK239931.1	100	402	0	0	1	402	257	658	0	743	Bacteria_Proteobacteria_Alphaproteobacteria_Rickettsiales_Anaplasmataceae_Anaplasma_Anaplasma phagocytophilum
NWSE-merged-M01780:105:000000000-CWNB3:1:1110:24487:20074	AB656108.1	98.832	428	5	0	1	428	340	767	0	763	Bacteria_NA_NA_NA_NA_NA_uncultured bacterium		PVIL-merged-M01780:105:000000000-CWNB3:1:1117:18383:5476	MK239931.1	100	402	0	0	1	402	257	658	0	743	Bacteria_Proteobacteria_Alphaproteobacteria_Rickettsiales_Anaplasmataceae_Anaplasma_Anaplasma phagocytophilum
NWSE-merged-M01780:105:000000000-CWNB3:1:1113:11893:16662	LC266596.1	99.297	427	3	0	1	427	1	427	0	773	Bacteria_NA_NA_NA_NA_NA_uncultured bacterium		PVIL-merged-M01780:105:000000000-CWNB3:1:2101:16029:16108	MK239931.1	100	402	0	0	1	402	257	658	0	743	Bacteria_Proteobacteria_Alphaproteobacteria_Rickettsiales_Anaplasmataceae_Anaplasma_Anaplasma phagocytophilum
NWSE-merged-M01780:105:000000000-CWNB3:1:1119:4253:17328	MG101063.1	100	402	0	0	1	402	17	418	0	743	Bacteria_NA_NA_NA_NA_NA_uncultured bacterium		PVIL-merged-M01780:105:000000000-CWNB3:1:2101:25270:20730	MK239931.1	100	408	0	0	1	408	251	658	0	754	Bacteria_Proteobacteria_Alphaproteobacteria_Rickettsiales_Anaplasmataceae_Anaplasma_Anaplasma phagocytophilum
NWSE-merged-M01780:105:000000000-CWNB3:1:1102:14220:13509	MH525291.1	98.829	427	5	0	1	427	1	427	0	761	Bacteria_NA_NA_NA_NA_NA_uncultured bacterium		PVIL-merged-M01780:105:000000000-CWNB3:1:2110:19712:23587	MK239931.1	98.507	402	6	0	1	402	257	658	0	710	Bacteria_Proteobacteria_Alphaproteobacteria_Rickettsiales_Anaplasmataceae_Anaplasma_Anaplasma phagocytophilum
NWSE-merged-M01780:105:000000000-CWNB3:1:2118:27379:11876	LN563865.1	99.525	421	2	0	1	421	303	723	0	767	Bacteria_NA_NA_NA_NA_NA_uncultured bacterium		PVIL-merged-M01780:105:000000000-CWNB3:1:1103:18871:19173	MK239931.1	100	402	0	0	1	402	257	658	0	743	Bacteria_Proteobacteria_Alphaproteobacteria_Rickettsiales_Anaplasmataceae_Anaplasma_Anaplasma phagocytophilum
NWSE-merged-M01780:105:000000000-CWNB3:1:1113:25513:15707	EF074243.1	99.254	402	3	0	1	402	271	672	0	726	Bacteria_NA_NA_NA_NA_NA_uncultured bacterium		PVIL-merged-M01780:105:000000000-CWNB3:1:1101:21307:22528	MK239931.1	100	402	0	0	1	402	257	658	0	743	Bacteria_Proteobacteria_Alphaproteobacteria_Rickettsiales_Anaplasmataceae_Anaplasma_Anaplasma phagocytophilum
NWSE-merged-M01780:105:000000000-CWNB3:1:1115:24919:3855	AB630573.1	89.655	406	38	4	1	404	311	714	1.43e-141	514	Bacteria_NA_NA_NA_NA_NA_uncultured bacterium		PVIL-merged-M01780:105:000000000-CWNB3:1:1102:29138:12276	MK239931.1	99.751	402	1	0	1	402	257	658	0	737	Bacteria_Proteobacteria_Alphaproteobacteria_Rickettsiales_Anaplasmataceae_Anaplasma_Anaplasma phagocytophilum
NWSE-merged-M01780:105:000000000-CWNB3:1:1116:26667:19115	AB656108.1	99.533	428	2	0	1	428	340	767	0	780	Bacteria_NA_NA_NA_NA_NA_uncultured bacterium		PVIL-merged-M01780:105:000000000-CWNB3:1:1106:8199:5842	AY969015.1	98.259	402	7	0	1	402	311	712	0	704	Bacteria_Proteobacteria_Alphaproteobacteria_Rickettsiales_Anaplasmataceae_Anaplasma_Anaplasma phagocytophilum
NWSE-merged-M01780:105:000000000-CWNB3:1:2104:27607:8237	LN563865.1	99.287	421	3	0	1	421	303	723	0	761	Bacteria_NA_NA_NA_NA_NA_uncultured bacterium		PVIL-merged-M01780:105:000000000-CWNB3:1:1110:19223:19946	MK239931.1	100	402	0	0	1	402	257	658	0	743	Bacteria_Proteobacteria_Alphaproteobacteria_Rickettsiales_Anaplasmataceae_Anaplasma_Anaplasma phagocytophilum
NWSE-merged-M01780:105:000000000-CWNB3:1:2112:10946:8755	KU382133.1	98.578	422	6	0	1	422	280	701	0	749	Bacteria_NA_NA_NA_NA_NA_uncultured bacterium		PVIL-merged-M01780:105:000000000-CWNB3:1:1113:5027:12780	MK239931.1	100	402	0	0	1	402	257	658	0	743	Bacteria_Proteobacteria_Alphaproteobacteria_Rickettsiales_Anaplasmataceae_Anaplasma_Anaplasma phagocytophilum
NWSE-merged-M01780:105:000000000-CWNB3:1:2118:19449:11083	LK025655.2	99.751	402	1	0	1	402	341	742	0	737	Bacteria_NA_NA_NA_NA_NA_uncultured bacterium		PVIL-merged-M01780:105:000000000-CWNB3:1:1115:10015:24568	MK239931.1	100	402	0	0	1	402	257	658	0	743	Bacteria_Proteobacteria_Alphaproteobacteria_Rickettsiales_Anaplasmataceae_Anaplasma_Anaplasma phagocytophilum
NWSE-merged-M01780:105:000000000-CWNB3:1:2119:26523:15698	MN503549.1	99.531	426	2	0	1	426	255	680	0	776	Bacteria_NA_NA_NA_NA_NA_uncultured bacterium		PVIL-merged-M01780:105:000000000-CWNB3:1:1116:3051:8685	MK239931.1	100	402	0	0	1	402	257	658	0	743	Bacteria_Proteobacteria_Alphaproteobacteria_Rickettsiales_Anaplasmataceae_Anaplasma_Anaplasma phagocytophilum
NWSE-merged-M01780:105:000000000-CWNB3:1:1103:6410:5830	AF508148.1	97.761	402	9	0	1	402	280	681	0	693	Bacteria_Proteobacteria_Alphaproteobacteria_Rhizobiales_Bradyrhizobiaceae_Bradyrhizobium_Bradyrhizobium sp. Leb-16		PVIL-merged-M01780:105:000000000-CWNB3:1:1118:4143:9549	MK239931.1	100	402	0	0	1	402	257	658	0	743	Bacteria_Proteobacteria_Alphaproteobacteria_Rickettsiales_Anaplasmataceae_Anaplasma_Anaplasma phagocytophilum
NWSE-merged-M01780:105:000000000-CWNB3:1:2115:15288:18899	AF508148.1	99.751	402	1	0	1	402	280	681	0	737	Bacteria_Proteobacteria_Alphaproteobacteria_Rhizobiales_Bradyrhizobiaceae_Bradyrhizobium_Bradyrhizobium sp. Leb-16		PVIL-merged-M01780:105:000000000-CWNB3:1:2101:10944:12288	AY969015.1	99.005	402	4	0	1	402	311	712	0	721	Bacteria_Proteobacteria_Alphaproteobacteria_Rickettsiales_Anaplasmataceae_Anaplasma_Anaplasma phagocytophilum
NWSE-merged-M01780:105:000000000-CWNB3:1:1101:8690:22105	AF510623.1	98.507	402	6	0	1	402	280	681	0	710	Bacteria_Proteobacteria_Alphaproteobacteria_Rhizobiales_Bradyrhizobiaceae_Bradyrhizobium_Bradyrhizobium sp. Phr-5		PVIL-merged-M01780:105:000000000-CWNB3:1:2102:28041:7838	MK239931.1	98.756	402	5	0	1	402	257	658	0	715	Bacteria_Proteobacteria_Alphaproteobacteria_Rickettsiales_Anaplasmataceae_Anaplasma_Anaplasma phagocytophilum
NWSE-merged-M01780:105:000000000-CWNB3:1:1103:10835:2667	KF311070.1	99.002	401	4	0	1	401	150	550	0	719	Bacteria_Proteobacteria_Alphaproteobacteria_Rhizobiales_Bradyrhizobiaceae_Bradyrhizobium_Bradyrhizobium sp. UFLA03_323		PVIL-merged-M01780:105:000000000-CWNB3:1:2106:14273:17250	MK239931.1	100	402	0	0	1	402	257	658	0	743	Bacteria_Proteobacteria_Alphaproteobacteria_Rickettsiales_Anaplasmataceae_Anaplasma_Anaplasma phagocytophilum
NWSE-merged-M01780:105:000000000-CWNB3:1:1109:22325:23131	MT534083.1	100	402	0	0	1	402	271	672	0	743	Bacteria_Proteobacteria_Alphaproteobacteria_Rhizobiales_Bradyrhizobiaceae_Bradyrhizobium_Bradyrhizobium valentinum		PVIL-merged-M01780:105:000000000-CWNB3:1:2113:13463:14590	MK239931.1	100	402	0	0	1	402	257	658	0	743	Bacteria_Proteobacteria_Alphaproteobacteria_Rickettsiales_Anaplasmataceae_Anaplasma_Anaplasma phagocytophilum
NWSE-merged-M01780:105:000000000-CWNB3:1:1114:13351:17383	MT534083.1	100	402	0	0	1	402	271	672	0	743	Bacteria_Proteobacteria_Alphaproteobacteria_Rhizobiales_Bradyrhizobiaceae_Bradyrhizobium_Bradyrhizobium valentinum		PVIL-merged-M01780:105:000000000-CWNB3:1:2115:26597:15653	MK239931.1	99.751	402	1	0	1	402	257	658	0	737	Bacteria_Proteobacteria_Alphaproteobacteria_Rickettsiales_Anaplasmataceae_Anaplasma_Anaplasma phagocytophilum
NWSE-merged-M01780:105:000000000-CWNB3:1:2110:16411:9246	MT534083.1	100	402	0	0	1	402	271	672	0	743	Bacteria_Proteobacteria_Alphaproteobacteria_Rhizobiales_Bradyrhizobiaceae_Bradyrhizobium_Bradyrhizobium valentinum		PVIL-merged-M01780:105:000000000-CWNB3:1:2115:6236:10857	MK239931.1	100	402	0	0	1	402	257	658	0	743	Bacteria_Proteobacteria_Alphaproteobacteria_Rickettsiales_Anaplasmataceae_Anaplasma_Anaplasma phagocytophilum
NWSE-merged-M01780:105:000000000-CWNB3:1:1110:9219:8248	MT534083.1	100	402	0	0	1	402	271	672	0	743	Bacteria_Proteobacteria_Alphaproteobacteria_Rhizobiales_Bradyrhizobiaceae_Bradyrhizobium_Bradyrhizobium valentinum		PVIL-merged-M01780:105:000000000-CWNB3:1:2117:19471:4347	MK239931.1	100	402	0	0	1	402	257	658	0	743	Bacteria_Proteobacteria_Alphaproteobacteria_Rickettsiales_Anaplasmataceae_Anaplasma_Anaplasma phagocytophilum
NWSE-merged-M01780:105:000000000-CWNB3:1:2117:11595:6660	MT534083.1	100	402	0	0	1	402	271	672	0	743	Bacteria_Proteobacteria_Alphaproteobacteria_Rhizobiales_Bradyrhizobiaceae_Bradyrhizobium_Bradyrhizobium valentinum		PVIL-merged-M01780:105:000000000-CWNB3:1:2119:16166:16038	MK239931.1	100	402	0	0	1	402	257	658	0	743	Bacteria_Proteobacteria_Alphaproteobacteria_Rickettsiales_Anaplasmataceae_Anaplasma_Anaplasma phagocytophilum
NWSE-merged-M01780:105:000000000-CWNB3:1:2110:18807:5329	MT534083.1	100	402	0	0	1	402	271	672	0	743	Bacteria_Proteobacteria_Alphaproteobacteria_Rhizobiales_Bradyrhizobiaceae_Bradyrhizobium_Bradyrhizobium valentinum		PVIL-merged-M01780:105:000000000-CWNB3:1:1103:24738:21794	MK239931.1	100	402	0	0	1	402	257	658	0	743	Bacteria_Proteobacteria_Alphaproteobacteria_Rickettsiales_Anaplasmataceae_Anaplasma_Anaplasma phagocytophilum
NWSE-merged-M01780:105:000000000-CWNB3:1:2119:9499:15878	MT534083.1	99.502	402	2	0	1	402	271	672	0	732	Bacteria_Proteobacteria_Alphaproteobacteria_Rhizobiales_Bradyrhizobiaceae_Bradyrhizobium_Bradyrhizobium valentinum		PVIL-merged-M01780:105:000000000-CWNB3:1:1106:14983:20811	MK239931.1	100	402	0	0	1	402	257	658	0	743	Bacteria_Proteobacteria_Alphaproteobacteria_Rickettsiales_Anaplasmataceae_Anaplasma_Anaplasma phagocytophilum
NWSE-merged-M01780:105:000000000-CWNB3:1:2119:9294:11541	MT534083.1	100	402	0	0	1	402	271	672	0	743	Bacteria_Proteobacteria_Alphaproteobacteria_Rhizobiales_Bradyrhizobiaceae_Bradyrhizobium_Bradyrhizobium valentinum		PVIL-merged-M01780:105:000000000-CWNB3:1:1106:20184:21755	MK239931.1	100	402	0	0	1	402	257	658	0	743	Bacteria_Proteobacteria_Alphaproteobacteria_Rickettsiales_Anaplasmataceae_Anaplasma_Anaplasma phagocytophilum
NWSE-merged-M01780:105:000000000-CWNB3:1:2108:18639:6476	MT534083.1	99.751	402	1	0	1	402	271	672	0	737	Bacteria_Proteobacteria_Alphaproteobacteria_Rhizobiales_Bradyrhizobiaceae_Bradyrhizobium_Bradyrhizobium valentinum		PVIL-merged-M01780:105:000000000-CWNB3:1:1108:16463:17232	MK239931.1	99.005	402	4	0	1	402	257	658	0	721	Bacteria_Proteobacteria_Alphaproteobacteria_Rickettsiales_Anaplasmataceae_Anaplasma_Anaplasma phagocytophilum
NWSE-merged-M01780:105:000000000-CWNB3:1:2115:9601:15706	MT534083.1	100	402	0	0	1	402	271	672	0	743	Bacteria_Proteobacteria_Alphaproteobacteria_Rhizobiales_Bradyrhizobiaceae_Bradyrhizobium_Bradyrhizobium valentinum		PVIL-merged-M01780:105:000000000-CWNB3:1:1111:6050:17579	AY969012.1	95.522	402	18	0	1	402	311	712	1.74e-180	643	Bacteria_Proteobacteria_Alphaproteobacteria_Rickettsiales_Anaplasmataceae_Anaplasma_Anaplasma phagocytophilum
NWSE-merged-M01780:105:000000000-CWNB3:1:2104:16666:9488	MT534083.1	100	402	0	0	1	402	271	672	0	743	Bacteria_Proteobacteria_Alphaproteobacteria_Rhizobiales_Bradyrhizobiaceae_Bradyrhizobium_Bradyrhizobium valentinum		PVIL-merged-M01780:105:000000000-CWNB3:1:1116:19243:5002	MK239931.1	98.756	402	5	0	1	402	257	658	0	715	Bacteria_Proteobacteria_Alphaproteobacteria_Rickettsiales_Anaplasmataceae_Anaplasma_Anaplasma phagocytophilum
NWSE-merged-M01780:105:000000000-CWNB3:1:1104:21983:23208	MT534083.1	100	402	0	0	1	402	271	672	0	743	Bacteria_Proteobacteria_Alphaproteobacteria_Rhizobiales_Bradyrhizobiaceae_Bradyrhizobium_Bradyrhizobium valentinum		PVIL-merged-M01780:105:000000000-CWNB3:1:2103:15381:9984	MK239931.1	100	402	0	0	1	402	257	658	0	743	Bacteria_Proteobacteria_Alphaproteobacteria_Rickettsiales_Anaplasmataceae_Anaplasma_Anaplasma phagocytophilum
NWSE-merged-M01780:105:000000000-CWNB3:1:1116:18304:17693	MT534083.1	100	402	0	0	1	402	271	672	0	743	Bacteria_Proteobacteria_Alphaproteobacteria_Rhizobiales_Bradyrhizobiaceae_Bradyrhizobium_Bradyrhizobium valentinum		PVIL-merged-M01780:105:000000000-CWNB3:1:2106:19914:23571	MK239931.1	99.751	402	1	0	1	402	257	658	0	737	Bacteria_Proteobacteria_Alphaproteobacteria_Rickettsiales_Anaplasmataceae_Anaplasma_Anaplasma phagocytophilum
NWSE-merged-M01780:105:000000000-CWNB3:1:1116:28044:11155	MT534083.1	99.751	402	1	0	1	402	271	672	0	737	Bacteria_Proteobacteria_Alphaproteobacteria_Rhizobiales_Bradyrhizobiaceae_Bradyrhizobium_Bradyrhizobium valentinum		PVIL-merged-M01780:105:000000000-CWNB3:1:2109:24123:10784	MK239931.1	99.751	402	1	0	1	402	257	658	0	737	Bacteria_Proteobacteria_Alphaproteobacteria_Rickettsiales_Anaplasmataceae_Anaplasma_Anaplasma phagocytophilum
NWSE-merged-M01780:105:000000000-CWNB3:1:1103:19796:12548	MT534083.1	100	402	0	0	1	402	271	672	0	743	Bacteria_Proteobacteria_Alphaproteobacteria_Rhizobiales_Bradyrhizobiaceae_Bradyrhizobium_Bradyrhizobium valentinum		PVIL-merged-M01780:105:000000000-CWNB3:1:2109:20061:20023	MK239931.1	100	402	0	0	1	402	257	658	0	743	Bacteria_Proteobacteria_Alphaproteobacteria_Rickettsiales_Anaplasmataceae_Anaplasma_Anaplasma phagocytophilum
NWSE-merged-M01780:105:000000000-CWNB3:1:1109:13266:12888	MT534083.1	100	402	0	0	1	402	271	672	0	743	Bacteria_Proteobacteria_Alphaproteobacteria_Rhizobiales_Bradyrhizobiaceae_Bradyrhizobium_Bradyrhizobium valentinum		PVIL-merged-M01780:105:000000000-CWNB3:1:2110:18670:15124	MK239931.1	100	411	0	0	1	411	257	667	0	760	Bacteria_Proteobacteria_Alphaproteobacteria_Rickettsiales_Anaplasmataceae_Anaplasma_Anaplasma phagocytophilum
NWSE-merged-M01780:105:000000000-CWNB3:1:1110:21425:9313	MT534083.1	99.751	402	1	0	1	402	271	672	0	737	Bacteria_Proteobacteria_Alphaproteobacteria_Rhizobiales_Bradyrhizobiaceae_Bradyrhizobium_Bradyrhizobium valentinum		PVIL-merged-M01780:105:000000000-CWNB3:1:2109:13897:12383	MK239931.1	99.502	402	2	0	1	402	257	658	0	732	Bacteria_Proteobacteria_Alphaproteobacteria_Rickettsiales_Anaplasmataceae_Anaplasma_Anaplasma phagocytophilum
NWSE-merged-M01780:105:000000000-CWNB3:1:1114:12970:14200	MT534083.1	100	402	0	0	1	402	271	672	0	743	Bacteria_Proteobacteria_Alphaproteobacteria_Rhizobiales_Bradyrhizobiaceae_Bradyrhizobium_Bradyrhizobium valentinum		PVIL-merged-M01780:105:000000000-CWNB3:1:2112:20692:16042	MK239931.1	100	402	0	0	1	402	257	658	0	743	Bacteria_Proteobacteria_Alphaproteobacteria_Rickettsiales_Anaplasmataceae_Anaplasma_Anaplasma phagocytophilum
NWSE-merged-M01780:105:000000000-CWNB3:1:1111:23501:12650	MT534083.1	100	402	0	0	1	402	271	672	0	743	Bacteria_Proteobacteria_Alphaproteobacteria_Rhizobiales_Bradyrhizobiaceae_Bradyrhizobium_Bradyrhizobium valentinum		PVIL-merged-M01780:105:000000000-CWNB3:1:2114:6635:6943	MK239931.1	99.751	402	1	0	1	402	257	658	0	737	Bacteria_Proteobacteria_Alphaproteobacteria_Rickettsiales_Anaplasmataceae_Anaplasma_Anaplasma phagocytophilum
NWSE-merged-M01780:105:000000000-CWNB3:1:2116:16494:23648	MT534083.1	99.751	402	1	0	1	402	271	672	0	739	Bacteria_Proteobacteria_Alphaproteobacteria_Rhizobiales_Bradyrhizobiaceae_Bradyrhizobium_Bradyrhizobium valentinum		PVIL-merged-M01780:105:000000000-CWNB3:1:2111:5486:5576	MK239931.1	100	402	0	0	1	402	257	658	0	743	Bacteria_Proteobacteria_Alphaproteobacteria_Rickettsiales_Anaplasmataceae_Anaplasma_Anaplasma phagocytophilum
NWSE-merged-M01780:105:000000000-CWNB3:1:1105:28653:14611	MT534083.1	100	402	0	0	1	402	271	672	0	743	Bacteria_Proteobacteria_Alphaproteobacteria_Rhizobiales_Bradyrhizobiaceae_Bradyrhizobium_Bradyrhizobium valentinum		PVIL-merged-M01780:105:000000000-CWNB3:1:2115:13876:6328	MK239931.1	100	402	0	0	1	402	257	658	0	743	Bacteria_Proteobacteria_Alphaproteobacteria_Rickettsiales_Anaplasmataceae_Anaplasma_Anaplasma phagocytophilum
NWSE-merged-M01780:105:000000000-CWNB3:1:2115:28406:12996	MT534083.1	99.751	402	1	0	1	402	271	672	0	737	Bacteria_Proteobacteria_Alphaproteobacteria_Rhizobiales_Bradyrhizobiaceae_Bradyrhizobium_Bradyrhizobium valentinum		PVIL-merged-M01780:105:000000000-CWNB3:1:2118:19658:4004	MK239931.1	99.751	402	1	0	1	402	257	658	0	737	Bacteria_Proteobacteria_Alphaproteobacteria_Rickettsiales_Anaplasmataceae_Anaplasma_Anaplasma phagocytophilum
NWSE-merged-M01780:105:000000000-CWNB3:1:1105:26496:13397	MT534083.1	100	402	0	0	1	402	271	672	0	743	Bacteria_Proteobacteria_Alphaproteobacteria_Rhizobiales_Bradyrhizobiaceae_Bradyrhizobium_Bradyrhizobium valentinum		PVIL-merged-M01780:105:000000000-CWNB3:1:1101:26922:14182	AY969012.1	94.802	404	17	3	1	402	311	712	1.75e-175	627	Bacteria_Proteobacteria_Alphaproteobacteria_Rickettsiales_Anaplasmataceae_Anaplasma_Anaplasma phagocytophilum
NWSE-merged-M01780:105:000000000-CWNB3:1:1114:15141:7471	MT534083.1	100	402	0	0	1	402	271	672	0	743	Bacteria_Proteobacteria_Alphaproteobacteria_Rhizobiales_Bradyrhizobiaceae_Bradyrhizobium_Bradyrhizobium valentinum		PVIL-merged-M01780:105:000000000-CWNB3:1:1101:9669:21028	MK239931.1	100	402	0	0	1	402	257	658	0	743	Bacteria_Proteobacteria_Alphaproteobacteria_Rickettsiales_Anaplasmataceae_Anaplasma_Anaplasma phagocytophilum
NWSE-merged-M01780:105:000000000-CWNB3:1:2117:15464:11641	MT534083.1	99.751	402	1	0	1	402	271	672	0	737	Bacteria_Proteobacteria_Alphaproteobacteria_Rhizobiales_Bradyrhizobiaceae_Bradyrhizobium_Bradyrhizobium valentinum		PVIL-merged-M01780:105:000000000-CWNB3:1:1109:4845:11459	MK239931.1	100	402	0	0	1	402	257	658	0	743	Bacteria_Proteobacteria_Alphaproteobacteria_Rickettsiales_Anaplasmataceae_Anaplasma_Anaplasma phagocytophilum
NWSE-merged-M01780:105:000000000-CWNB3:1:1114:22504:20066	GQ129871.1	99.751	402	1	0	1	402	292	693	0	737	Bacteria_Proteobacteria_Alphaproteobacteria_Rhizobiales_Bradyrhizobiaceae_Bradyrhizobium_uncultured Bradyrhizobium sp.		PVIL-merged-M01780:105:000000000-CWNB3:1:1111:21819:8304	MK239931.1	100	402	0	0	1	402	257	658	0	743	Bacteria_Proteobacteria_Alphaproteobacteria_Rickettsiales_Anaplasmataceae_Anaplasma_Anaplasma phagocytophilum
NWSE-merged-M01780:105:000000000-CWNB3:1:1105:14371:15632	FJ193439.1	99.751	402	1	0	1	402	313	714	0	739	Bacteria_Proteobacteria_Alphaproteobacteria_Rhizobiales_Bradyrhizobiaceae_Bradyrhizobium_uncultured Bradyrhizobium sp.		PVIL-merged-M01780:105:000000000-CWNB3:1:1113:11197:15105	MK239931.1	100	402	0	0	1	402	257	658	0	743	Bacteria_Proteobacteria_Alphaproteobacteria_Rickettsiales_Anaplasmataceae_Anaplasma_Anaplasma phagocytophilum
NWSE-merged-M01780:105:000000000-CWNB3:1:2118:13304:16928	FJ192733.1	99.751	402	1	0	1	402	316	717	0	739	Bacteria_Proteobacteria_Alphaproteobacteria_Rhizobiales_Bradyrhizobiaceae_Bradyrhizobium_uncultured Bradyrhizobium sp.		PVIL-merged-M01780:105:000000000-CWNB3:1:1112:7615:5664	MK239931.1	100	402	0	0	1	402	257	658	0	743	Bacteria_Proteobacteria_Alphaproteobacteria_Rickettsiales_Anaplasmataceae_Anaplasma_Anaplasma phagocytophilum
NWSE-merged-M01780:105:000000000-CWNB3:1:1107:26663:6093	MG803138.1	100	408	0	0	1	408	14	421	0	754	Bacteria_Proteobacteria_Alphaproteobacteria_Rhizobiales_Bradyrhizobiaceae_NA_uncultured Bradyrhizobiaceae bacterium		PVIL-merged-M01780:105:000000000-CWNB3:1:1112:2616:17222	MK239931.1	100	402	0	0	1	402	257	658	0	743	Bacteria_Proteobacteria_Alphaproteobacteria_Rickettsiales_Anaplasmataceae_Anaplasma_Anaplasma phagocytophilum
NWSE-merged-M01780:105:000000000-CWNB3:1:1106:19349:13190	GU074289.1	95.025	402	20	0	1	402	278	679	3.76e-177	632	Bacteria_Proteobacteria_Alphaproteobacteria_Rhodospirillales_Acetobacteraceae_Roseococcus_uncultured Roseococcus sp.		PVIL-merged-M01780:105:000000000-CWNB3:1:1113:21168:17015	MK239931.1	99.751	402	1	0	1	402	257	658	0	737	Bacteria_Proteobacteria_Alphaproteobacteria_Rickettsiales_Anaplasmataceae_Anaplasma_Anaplasma phagocytophilum
NWSE-merged-M01780:105:000000000-CWNB3:1:1107:17473:16728	MH078385.1	94.279	402	23	0	1	402	283	684	3.78e-172	616	Bacteria_Proteobacteria_Alphaproteobacteria_Rickettsiales_Anaplasmataceae_NA_uncultured Anaplasmataceae bacterium		PVIL-merged-M01780:105:000000000-CWNB3:1:1116:13895:12947	MK239931.1	100	402	0	0	1	402	257	658	0	743	Bacteria_Proteobacteria_Alphaproteobacteria_Rickettsiales_Anaplasmataceae_Anaplasma_Anaplasma phagocytophilum
NWSE-merged-M01780:105:000000000-CWNB3:1:2114:18611:20349	MH078385.1	94.75	400	21	0	1	400	283	682	2.26e-174	623	Bacteria_Proteobacteria_Alphaproteobacteria_Rickettsiales_Anaplasmataceae_NA_uncultured Anaplasmataceae bacterium		PVIL-merged-M01780:105:000000000-CWNB3:1:1116:29217:13916	MK239931.1	100	402	0	0	1	402	257	658	0	743	Bacteria_Proteobacteria_Alphaproteobacteria_Rickettsiales_Anaplasmataceae_Anaplasma_Anaplasma phagocytophilum
NWSE-merged-M01780:105:000000000-CWNB3:1:1113:6898:11898	MH078385.1	95.274	402	19	0	1	402	283	684	8.07e-179	638	Bacteria_Proteobacteria_Alphaproteobacteria_Rickettsiales_Anaplasmataceae_NA_uncultured Anaplasmataceae bacterium		PVIL-merged-M01780:105:000000000-CWNB3:1:1119:24518:6371	AY969012.1	98.756	402	5	0	1	402	311	712	0	715	Bacteria_Proteobacteria_Alphaproteobacteria_Rickettsiales_Anaplasmataceae_Anaplasma_Anaplasma phagocytophilum
NWSE-merged-M01780:105:000000000-CWNB3:1:1112:20968:14988	MH078385.1	94.527	402	22	0	1	402	283	684	8.13e-174	621	Bacteria_Proteobacteria_Alphaproteobacteria_Rickettsiales_Anaplasmataceae_NA_uncultured Anaplasmataceae bacterium		PVIL-merged-M01780:105:000000000-CWNB3:1:2103:26736:13422	MK239931.1	100	402	0	0	1	402	257	658	0	743	Bacteria_Proteobacteria_Alphaproteobacteria_Rickettsiales_Anaplasmataceae_Anaplasma_Anaplasma phagocytophilum
NWSE-merged-M01780:105:000000000-CWNB3:1:1112:14427:5023	MH078385.1	94.776	402	21	0	1	402	283	684	1.75e-175	627	Bacteria_Proteobacteria_Alphaproteobacteria_Rickettsiales_Anaplasmataceae_NA_uncultured Anaplasmataceae bacterium		PVIL-merged-M01780:105:000000000-CWNB3:1:2112:10583:17814	MK239931.1	98.756	402	4	1	1	401	257	658	0	713	Bacteria_Proteobacteria_Alphaproteobacteria_Rickettsiales_Anaplasmataceae_Anaplasma_Anaplasma phagocytophilum
NWSE-merged-M01780:105:000000000-CWNB3:1:1118:17764:5769	MH078385.1	95.274	402	19	0	1	402	283	684	8.07e-179	638	Bacteria_Proteobacteria_Alphaproteobacteria_Rickettsiales_Anaplasmataceae_NA_uncultured Anaplasmataceae bacterium		PVIL-merged-M01780:105:000000000-CWNB3:1:2113:14837:6240	MK239931.1	98.507	402	6	0	1	402	257	658	0	710	Bacteria_Proteobacteria_Alphaproteobacteria_Rickettsiales_Anaplasmataceae_Anaplasma_Anaplasma phagocytophilum
NWSE-merged-M01780:105:000000000-CWNB3:1:2113:9473:5686	MH078385.1	95.771	402	17	0	1	402	283	684	0	649	Bacteria_Proteobacteria_Alphaproteobacteria_Rickettsiales_Anaplasmataceae_NA_uncultured Anaplasmataceae bacterium		PVIL-merged-M01780:105:000000000-CWNB3:1:2109:18198:2201	MK239931.1	99.502	402	2	0	1	402	257	658	0	732	Bacteria_Proteobacteria_Alphaproteobacteria_Rickettsiales_Anaplasmataceae_Anaplasma_Anaplasma phagocytophilum
NWSE-merged-M01780:105:000000000-CWNB3:1:1104:11431:14579	MH078385.1	95.771	402	17	0	1	402	283	684	0	649	Bacteria_Proteobacteria_Alphaproteobacteria_Rickettsiales_Anaplasmataceae_NA_uncultured Anaplasmataceae bacterium		PVIL-merged-M01780:105:000000000-CWNB3:1:2110:20230:24250	MK239931.1	100	402	0	0	1	402	257	658	0	743	Bacteria_Proteobacteria_Alphaproteobacteria_Rickettsiales_Anaplasmataceae_Anaplasma_Anaplasma phagocytophilum
NWSE-merged-M01780:105:000000000-CWNB3:1:2111:16686:23373	MH078385.1	97.264	402	11	0	1	402	283	684	0	682	Bacteria_Proteobacteria_Alphaproteobacteria_Rickettsiales_Anaplasmataceae_NA_uncultured Anaplasmataceae bacterium		PVIL-merged-M01780:105:000000000-CWNB3:1:2116:3021:14952	MK239931.1	98.756	402	5	0	1	402	257	658	0	715	Bacteria_Proteobacteria_Alphaproteobacteria_Rickettsiales_Anaplasmataceae_Anaplasma_Anaplasma phagocytophilum
NWSE-merged-M01780:105:000000000-CWNB3:1:2109:19237:8619	MH078385.1	94.776	402	21	0	1	402	283	684	1.75e-175	627	Bacteria_Proteobacteria_Alphaproteobacteria_Rickettsiales_Anaplasmataceae_NA_uncultured Anaplasmataceae bacterium		PVIL-merged-M01780:105:000000000-CWNB3:1:2118:6945:5609	MK239931.1	98.756	402	5	0	1	402	257	658	0	715	Bacteria_Proteobacteria_Alphaproteobacteria_Rickettsiales_Anaplasmataceae_Anaplasma_Anaplasma phagocytophilum
NWSE-merged-M01780:105:000000000-CWNB3:1:1117:8112:10614	MH078385.1	89.223	399	43	0	1	399	283	681	3.97e-137	499	Bacteria_Proteobacteria_Alphaproteobacteria_Rickettsiales_Anaplasmataceae_NA_uncultured Anaplasmataceae bacterium		PVIL-merged-M01780:105:000000000-CWNB3:1:2119:7768:17924	MK239931.1	100	402	0	0	1	402	257	658	0	743	Bacteria_Proteobacteria_Alphaproteobacteria_Rickettsiales_Anaplasmataceae_Anaplasma_Anaplasma phagocytophilum
NWSE-merged-M01780:105:000000000-CWNB3:1:1105:14774:12424	MH078385.1	94.527	402	22	0	1	402	283	684	8.13e-174	621	Bacteria_Proteobacteria_Alphaproteobacteria_Rickettsiales_Anaplasmataceae_NA_uncultured Anaplasmataceae bacterium		PVIL-merged-M01780:105:000000000-CWNB3:1:2119:21880:9199	MK239931.1	100	402	0	0	1	402	257	658	0	743	Bacteria_Proteobacteria_Alphaproteobacteria_Rickettsiales_Anaplasmataceae_Anaplasma_Anaplasma phagocytophilum
NWSE-merged-M01780:105:000000000-CWNB3:1:2113:23503:4604	MH618380.1	97.761	402	9	0	1	402	248	649	0	693	Bacteria_Proteobacteria_Alphaproteobacteria_Rickettsiales_Anaplasmataceae_Wolbachia_Wolbachia endosymbiont of Cimex lectularius		PVIL-merged-M01780:105:000000000-CWNB3:1:1104:14687:5010	MK239931.1	99.254	402	3	0	1	402	257	658	0	726	Bacteria_Proteobacteria_Alphaproteobacteria_Rickettsiales_Anaplasmataceae_Anaplasma_Anaplasma phagocytophilum
NWSE-merged-M01780:105:000000000-CWNB3:1:1112:17509:21199	MH618380.1	98.507	402	6	0	1	402	248	649	0	710	Bacteria_Proteobacteria_Alphaproteobacteria_Rickettsiales_Anaplasmataceae_Wolbachia_Wolbachia endosymbiont of Cimex lectularius		PVIL-merged-M01780:105:000000000-CWNB3:1:1101:16509:17970	MK239931.1	100	402	0	0	1	402	257	658	0	743	Bacteria_Proteobacteria_Alphaproteobacteria_Rickettsiales_Anaplasmataceae_Anaplasma_Anaplasma phagocytophilum
NWSE-merged-M01780:105:000000000-CWNB3:1:1111:17104:20469	MH618380.1	99.254	402	3	0	1	402	248	649	0	726	Bacteria_Proteobacteria_Alphaproteobacteria_Rickettsiales_Anaplasmataceae_Wolbachia_Wolbachia endosymbiont of Cimex lectularius		PVIL-merged-M01780:105:000000000-CWNB3:1:1108:15792:15144	MK239931.1	100	402	0	0	1	402	257	658	0	743	Bacteria_Proteobacteria_Alphaproteobacteria_Rickettsiales_Anaplasmataceae_Anaplasma_Anaplasma phagocytophilum
NWSE-merged-M01780:105:000000000-CWNB3:1:2109:6001:8583	MH618380.1	98.259	402	7	0	1	402	248	649	0	704	Bacteria_Proteobacteria_Alphaproteobacteria_Rickettsiales_Anaplasmataceae_Wolbachia_Wolbachia endosymbiont of Cimex lectularius		PVIL-merged-M01780:105:000000000-CWNB3:1:1107:14620:18365	MK239931.1	100	402	0	0	1	402	257	658	0	743	Bacteria_Proteobacteria_Alphaproteobacteria_Rickettsiales_Anaplasmataceae_Anaplasma_Anaplasma phagocytophilum
NWSE-merged-M01780:105:000000000-CWNB3:1:2111:16934:16095	GQ422893.1	99.005	402	4	0	1	402	255	656	0	721	Bacteria_Proteobacteria_Alphaproteobacteria_Rickettsiales_Anaplasmataceae_Wolbachia_Wolbachia endosymbiont of Odontotermes horni		PVIL-merged-M01780:105:000000000-CWNB3:1:1110:12545:13250	MK239931.1	100	402	0	0	1	402	257	658	0	743	Bacteria_Proteobacteria_Alphaproteobacteria_Rickettsiales_Anaplasmataceae_Anaplasma_Anaplasma phagocytophilum
NWSE-merged-M01780:105:000000000-CWNB3:1:1116:16919:16288	MH020205.1	99.751	402	1	0	1	402	202	603	0	737	Bacteria_Proteobacteria_Alphaproteobacteria_Rickettsiales_Anaplasmataceae_Wolbachia_Wolbachia sp.		PVIL-merged-M01780:105:000000000-CWNB3:1:1111:15835:18270	MK239931.1	100	402	0	0	1	402	257	658	0	743	Bacteria_Proteobacteria_Alphaproteobacteria_Rickettsiales_Anaplasmataceae_Anaplasma_Anaplasma phagocytophilum
NWSE-merged-M01780:105:000000000-CWNB3:1:2109:18228:15932	MH020205.1	99.751	402	1	0	1	402	202	603	0	737	Bacteria_Proteobacteria_Alphaproteobacteria_Rickettsiales_Anaplasmataceae_Wolbachia_Wolbachia sp.		PVIL-merged-M01780:105:000000000-CWNB3:1:1112:22816:9357	MK239931.1	99.502	402	2	0	1	402	257	658	0	732	Bacteria_Proteobacteria_Alphaproteobacteria_Rickettsiales_Anaplasmataceae_Anaplasma_Anaplasma phagocytophilum
NWSE-merged-M01780:105:000000000-CWNB3:1:2115:5196:15158	MH020205.1	99.254	402	3	0	1	402	202	603	0	726	Bacteria_Proteobacteria_Alphaproteobacteria_Rickettsiales_Anaplasmataceae_Wolbachia_Wolbachia sp.		PVIL-merged-M01780:105:000000000-CWNB3:1:1115:15251:14427	MK239931.1	99.751	402	1	0	1	402	257	658	0	737	Bacteria_Proteobacteria_Alphaproteobacteria_Rickettsiales_Anaplasmataceae_Anaplasma_Anaplasma phagocytophilum
NWSE-merged-M01780:105:000000000-CWNB3:1:2115:16264:5316	MH020205.1	99.502	402	2	0	1	402	202	603	0	732	Bacteria_Proteobacteria_Alphaproteobacteria_Rickettsiales_Anaplasmataceae_Wolbachia_Wolbachia sp.		PVIL-merged-M01780:105:000000000-CWNB3:1:1118:13890:11712	MK239931.1	100	402	0	0	1	402	257	658	0	743	Bacteria_Proteobacteria_Alphaproteobacteria_Rickettsiales_Anaplasmataceae_Anaplasma_Anaplasma phagocytophilum
NWSE-merged-M01780:105:000000000-CWNB3:1:2105:15658:17947	MH020205.1	99.751	402	1	0	1	402	202	603	0	737	Bacteria_Proteobacteria_Alphaproteobacteria_Rickettsiales_Anaplasmataceae_Wolbachia_Wolbachia sp.		PVIL-merged-M01780:105:000000000-CWNB3:1:1117:16537:7264	MK239931.1	100	402	0	0	1	402	257	658	0	743	Bacteria_Proteobacteria_Alphaproteobacteria_Rickettsiales_Anaplasmataceae_Anaplasma_Anaplasma phagocytophilum
NWSE-merged-M01780:105:000000000-CWNB3:1:2109:7551:6285	MH020205.1	99.005	402	4	0	1	402	202	603	0	721	Bacteria_Proteobacteria_Alphaproteobacteria_Rickettsiales_Anaplasmataceae_Wolbachia_Wolbachia sp.		PVIL-merged-M01780:105:000000000-CWNB3:1:2103:9506:5310	MK239931.1	99.751	402	1	0	1	402	257	658	0	737	Bacteria_Proteobacteria_Alphaproteobacteria_Rickettsiales_Anaplasmataceae_Anaplasma_Anaplasma phagocytophilum
NWSE-merged-M01780:105:000000000-CWNB3:1:2115:12060:16321	MH020205.1	99.502	402	2	0	1	402	202	603	0	732	Bacteria_Proteobacteria_Alphaproteobacteria_Rickettsiales_Anaplasmataceae_Wolbachia_Wolbachia sp.		PVIL-merged-M01780:105:000000000-CWNB3:1:2104:11745:14336	MK239931.1	100	402	0	0	1	402	257	658	0	743	Bacteria_Proteobacteria_Alphaproteobacteria_Rickettsiales_Anaplasmataceae_Anaplasma_Anaplasma phagocytophilum
NWSE-merged-M01780:105:000000000-CWNB3:1:1114:17421:15310	MH020205.1	99.751	402	1	0	1	402	202	603	0	737	Bacteria_Proteobacteria_Alphaproteobacteria_Rickettsiales_Anaplasmataceae_Wolbachia_Wolbachia sp.		PVIL-merged-M01780:105:000000000-CWNB3:1:2106:28546:15081	MK239931.1	99.751	402	1	0	1	402	257	658	0	737	Bacteria_Proteobacteria_Alphaproteobacteria_Rickettsiales_Anaplasmataceae_Anaplasma_Anaplasma phagocytophilum
NWSE-merged-M01780:105:000000000-CWNB3:1:2102:5524:19081	MH020205.1	99.502	402	2	0	1	402	202	603	0	732	Bacteria_Proteobacteria_Alphaproteobacteria_Rickettsiales_Anaplasmataceae_Wolbachia_Wolbachia sp.		PVIL-merged-M01780:105:000000000-CWNB3:1:2106:19069:14658	MK239931.1	99.751	402	1	0	1	402	257	658	0	737	Bacteria_Proteobacteria_Alphaproteobacteria_Rickettsiales_Anaplasmataceae_Anaplasma_Anaplasma phagocytophilum
NWSE-merged-M01780:105:000000000-CWNB3:1:1105:22815:22236	MH020205.1	99.751	402	1	0	1	402	202	603	0	737	Bacteria_Proteobacteria_Alphaproteobacteria_Rickettsiales_Anaplasmataceae_Wolbachia_Wolbachia sp.		PVIL-merged-M01780:105:000000000-CWNB3:1:2111:21335:14243	MK239931.1	100	402	0	0	1	402	257	658	0	743	Bacteria_Proteobacteria_Alphaproteobacteria_Rickettsiales_Anaplasmataceae_Anaplasma_Anaplasma phagocytophilum
NWSE-merged-M01780:105:000000000-CWNB3:1:1107:17198:18464	MH020205.1	99.502	402	2	0	1	402	202	603	0	732	Bacteria_Proteobacteria_Alphaproteobacteria_Rickettsiales_Anaplasmataceae_Wolbachia_Wolbachia sp.		PVIL-merged-M01780:105:000000000-CWNB3:1:2109:15804:5236	MK239931.1	99.751	402	1	0	1	402	257	658	0	737	Bacteria_Proteobacteria_Alphaproteobacteria_Rickettsiales_Anaplasmataceae_Anaplasma_Anaplasma phagocytophilum
NWSE-merged-M01780:105:000000000-CWNB3:1:2119:13360:7291	MH020205.1	99.751	402	1	0	1	402	202	603	0	737	Bacteria_Proteobacteria_Alphaproteobacteria_Rickettsiales_Anaplasmataceae_Wolbachia_Wolbachia sp.		PVIL-merged-M01780:105:000000000-CWNB3:1:2113:7019:9987	MK239931.1	99.751	402	1	0	1	402	257	658	0	737	Bacteria_Proteobacteria_Alphaproteobacteria_Rickettsiales_Anaplasmataceae_Anaplasma_Anaplasma phagocytophilum
NWSE-merged-M01780:105:000000000-CWNB3:1:1113:4959:20609	MH020205.1	99.751	402	1	0	1	402	202	603	0	737	Bacteria_Proteobacteria_Alphaproteobacteria_Rickettsiales_Anaplasmataceae_Wolbachia_Wolbachia sp.		PVIL-merged-M01780:105:000000000-CWNB3:1:1103:18029:21809	AY969012.1	98.01	402	8	0	1	402	311	712	0	699	Bacteria_Proteobacteria_Alphaproteobacteria_Rickettsiales_Anaplasmataceae_Anaplasma_Anaplasma phagocytophilum
NWSE-merged-M01780:105:000000000-CWNB3:1:2102:16450:13577	MH020205.1	98.01	402	8	0	1	402	202	603	0	699	Bacteria_Proteobacteria_Alphaproteobacteria_Rickettsiales_Anaplasmataceae_Wolbachia_Wolbachia sp.		PVIL-merged-M01780:105:000000000-CWNB3:1:1107:20701:8046	MK239931.1	100	402	0	0	1	402	257	658	0	743	Bacteria_Proteobacteria_Alphaproteobacteria_Rickettsiales_Anaplasmataceae_Anaplasma_Anaplasma phagocytophilum
NWSE-merged-M01780:105:000000000-CWNB3:1:2110:20142:16459	MH020205.1	99.751	402	1	0	1	402	202	603	0	737	Bacteria_Proteobacteria_Alphaproteobacteria_Rickettsiales_Anaplasmataceae_Wolbachia_Wolbachia sp.		PVIL-merged-M01780:105:000000000-CWNB3:1:1107:22083:18040	MK239931.1	100	402	0	0	1	402	257	658	0	743	Bacteria_Proteobacteria_Alphaproteobacteria_Rickettsiales_Anaplasmataceae_Anaplasma_Anaplasma phagocytophilum
NWSE-merged-M01780:105:000000000-CWNB3:1:1117:13376:7438	MH020205.1	99.502	402	2	0	1	402	202	603	0	732	Bacteria_Proteobacteria_Alphaproteobacteria_Rickettsiales_Anaplasmataceae_Wolbachia_Wolbachia sp.		PVIL-merged-M01780:105:000000000-CWNB3:1:1112:9768:13390	MK239931.1	100	402	0	0	1	402	257	658	0	743	Bacteria_Proteobacteria_Alphaproteobacteria_Rickettsiales_Anaplasmataceae_Anaplasma_Anaplasma phagocytophilum
NWSE-merged-M01780:105:000000000-CWNB3:1:2110:4353:16900	MH020205.1	99.254	402	3	0	1	402	202	603	0	726	Bacteria_Proteobacteria_Alphaproteobacteria_Rickettsiales_Anaplasmataceae_Wolbachia_Wolbachia sp.		PVIL-merged-M01780:105:000000000-CWNB3:1:1113:14067:8711	MK239931.1	100	402	0	0	1	402	257	658	0	743	Bacteria_Proteobacteria_Alphaproteobacteria_Rickettsiales_Anaplasmataceae_Anaplasma_Anaplasma phagocytophilum
NWSE-merged-M01780:105:000000000-CWNB3:1:1112:18742:18453	MH020205.1	99.254	402	3	0	1	402	202	603	0	726	Bacteria_Proteobacteria_Alphaproteobacteria_Rickettsiales_Anaplasmataceae_Wolbachia_Wolbachia sp.		PVIL-merged-M01780:105:000000000-CWNB3:1:1113:12993:19297	AY969012.1	96.517	402	14	0	1	402	311	712	0	665	Bacteria_Proteobacteria_Alphaproteobacteria_Rickettsiales_Anaplasmataceae_Anaplasma_Anaplasma phagocytophilum
NWSE-merged-M01780:105:000000000-CWNB3:1:2117:17427:22908	MH020205.1	99.254	402	3	0	1	402	202	603	0	726	Bacteria_Proteobacteria_Alphaproteobacteria_Rickettsiales_Anaplasmataceae_Wolbachia_Wolbachia sp.		PVIL-merged-M01780:105:000000000-CWNB3:1:1112:25316:21236	MK239931.1	99.254	402	3	0	1	402	257	658	0	726	Bacteria_Proteobacteria_Alphaproteobacteria_Rickettsiales_Anaplasmataceae_Anaplasma_Anaplasma phagocytophilum
NWSE-merged-M01780:105:000000000-CWNB3:1:2113:10533:12553	MH020205.1	99.751	402	1	0	1	402	202	603	0	737	Bacteria_Proteobacteria_Alphaproteobacteria_Rickettsiales_Anaplasmataceae_Wolbachia_Wolbachia sp.		PVIL-merged-M01780:105:000000000-CWNB3:1:1114:13121:2795	MK239931.1	100	402	0	0	1	402	257	658	0	743	Bacteria_Proteobacteria_Alphaproteobacteria_Rickettsiales_Anaplasmataceae_Anaplasma_Anaplasma phagocytophilum
NWSE-merged-M01780:105:000000000-CWNB3:1:2116:21894:18723	MH020205.1	99.502	402	2	0	1	402	202	603	0	732	Bacteria_Proteobacteria_Alphaproteobacteria_Rickettsiales_Anaplasmataceae_Wolbachia_Wolbachia sp.		PVIL-merged-M01780:105:000000000-CWNB3:1:2103:5869:8952	MK239931.1	99.751	402	1	0	1	402	257	658	0	737	Bacteria_Proteobacteria_Alphaproteobacteria_Rickettsiales_Anaplasmataceae_Anaplasma_Anaplasma phagocytophilum
NWSE-merged-M01780:105:000000000-CWNB3:1:2117:11522:4889	MH020205.1	99.502	402	2	0	1	402	202	603	0	732	Bacteria_Proteobacteria_Alphaproteobacteria_Rickettsiales_Anaplasmataceae_Wolbachia_Wolbachia sp.		PVIL-merged-M01780:105:000000000-CWNB3:1:2105:27917:11528	MK239931.1	100	402	0	0	1	402	257	658	0	743	Bacteria_Proteobacteria_Alphaproteobacteria_Rickettsiales_Anaplasmataceae_Anaplasma_Anaplasma phagocytophilum
NWSE-merged-M01780:105:000000000-CWNB3:1:2106:8086:23035	MH020205.1	99.502	402	2	0	1	402	202	603	0	732	Bacteria_Proteobacteria_Alphaproteobacteria_Rickettsiales_Anaplasmataceae_Wolbachia_Wolbachia sp.		PVIL-merged-M01780:105:000000000-CWNB3:1:2105:16307:10205	MK239931.1	100	402	0	0	1	402	257	658	0	743	Bacteria_Proteobacteria_Alphaproteobacteria_Rickettsiales_Anaplasmataceae_Anaplasma_Anaplasma phagocytophilum
NWSE-merged-M01780:105:000000000-CWNB3:1:1101:20995:3441	MH020205.1	98.756	402	5	0	1	402	202	603	0	715	Bacteria_Proteobacteria_Alphaproteobacteria_Rickettsiales_Anaplasmataceae_Wolbachia_Wolbachia sp.		PVIL-merged-M01780:105:000000000-CWNB3:1:2109:10178:24557	MK239931.1	100	402	0	0	1	402	257	658	0	743	Bacteria_Proteobacteria_Alphaproteobacteria_Rickettsiales_Anaplasmataceae_Anaplasma_Anaplasma phagocytophilum
NWSE-merged-M01780:105:000000000-CWNB3:1:1101:8168:23971	MH020205.1	99.005	402	4	0	1	402	202	603	0	721	Bacteria_Proteobacteria_Alphaproteobacteria_Rickettsiales_Anaplasmataceae_Wolbachia_Wolbachia sp.		PVIL-merged-M01780:105:000000000-CWNB3:1:2110:26989:6304	MK239931.1	100	402	0	0	1	402	257	658	0	743	Bacteria_Proteobacteria_Alphaproteobacteria_Rickettsiales_Anaplasmataceae_Anaplasma_Anaplasma phagocytophilum
NWSE-merged-M01780:105:000000000-CWNB3:1:1108:16398:8383	MH020205.1	99.751	402	1	0	1	402	202	603	0	737	Bacteria_Proteobacteria_Alphaproteobacteria_Rickettsiales_Anaplasmataceae_Wolbachia_Wolbachia sp.		PVIL-merged-M01780:105:000000000-CWNB3:1:2111:10311:20909	MK239931.1	100	402	0	0	1	402	257	658	0	743	Bacteria_Proteobacteria_Alphaproteobacteria_Rickettsiales_Anaplasmataceae_Anaplasma_Anaplasma phagocytophilum
NWSE-merged-M01780:105:000000000-CWNB3:1:2105:20861:12596	MH020205.1	99.751	402	1	0	1	402	202	603	0	737	Bacteria_Proteobacteria_Alphaproteobacteria_Rickettsiales_Anaplasmataceae_Wolbachia_Wolbachia sp.		PVIL-merged-M01780:105:000000000-CWNB3:1:2115:25791:18053	MK239931.1	100	402	0	0	1	402	257	658	0	743	Bacteria_Proteobacteria_Alphaproteobacteria_Rickettsiales_Anaplasmataceae_Anaplasma_Anaplasma phagocytophilum
NWSE-merged-M01780:105:000000000-CWNB3:1:1108:7672:10066	MH020205.1	99.751	402	1	0	1	402	202	603	0	737	Bacteria_Proteobacteria_Alphaproteobacteria_Rickettsiales_Anaplasmataceae_Wolbachia_Wolbachia sp.		PVIL-merged-M01780:105:000000000-CWNB3:1:2119:21044:23581	MK239931.1	100	402	0	0	1	402	257	658	0	743	Bacteria_Proteobacteria_Alphaproteobacteria_Rickettsiales_Anaplasmataceae_Anaplasma_Anaplasma phagocytophilum
NWSE-merged-M01780:105:000000000-CWNB3:1:1104:21551:21373	MH020205.1	99.502	402	2	0	1	402	202	603	0	732	Bacteria_Proteobacteria_Alphaproteobacteria_Rickettsiales_Anaplasmataceae_Wolbachia_Wolbachia sp.		PVIL-merged-M01780:105:000000000-CWNB3:1:1103:12032:3899	MK239931.1	99.751	402	1	0	1	402	257	658	0	737	Bacteria_Proteobacteria_Alphaproteobacteria_Rickettsiales_Anaplasmataceae_Anaplasma_Anaplasma phagocytophilum
NWSE-merged-M01780:105:000000000-CWNB3:1:1119:16519:20909	MH020205.1	99.751	402	1	0	1	402	202	603	0	737	Bacteria_Proteobacteria_Alphaproteobacteria_Rickettsiales_Anaplasmataceae_Wolbachia_Wolbachia sp.		PVIL-merged-M01780:105:000000000-CWNB3:1:1101:22168:24649	MK239931.1	100	402	0	0	1	402	257	658	0	743	Bacteria_Proteobacteria_Alphaproteobacteria_Rickettsiales_Anaplasmataceae_Anaplasma_Anaplasma phagocytophilum
NWSE-merged-M01780:105:000000000-CWNB3:1:1106:29106:14509	MH020205.1	99.502	402	2	0	1	402	202	603	0	732	Bacteria_Proteobacteria_Alphaproteobacteria_Rickettsiales_Anaplasmataceae_Wolbachia_Wolbachia sp.		PVIL-merged-M01780:105:000000000-CWNB3:1:1103:16884:13899	MK239931.1	100	402	0	0	1	402	257	658	0	743	Bacteria_Proteobacteria_Alphaproteobacteria_Rickettsiales_Anaplasmataceae_Anaplasma_Anaplasma phagocytophilum
NWSE-merged-M01780:105:000000000-CWNB3:1:1101:7748:15793	MH020205.1	99.751	402	1	0	1	402	202	603	0	737	Bacteria_Proteobacteria_Alphaproteobacteria_Rickettsiales_Anaplasmataceae_Wolbachia_Wolbachia sp.		PVIL-merged-M01780:105:000000000-CWNB3:1:1106:23458:5652	MK239931.1	100	402	0	0	1	402	257	658	0	743	Bacteria_Proteobacteria_Alphaproteobacteria_Rickettsiales_Anaplasmataceae_Anaplasma_Anaplasma phagocytophilum
NWSE-merged-M01780:105:000000000-CWNB3:1:2101:22693:23081	MH020205.1	99.751	402	1	0	1	402	202	603	0	737	Bacteria_Proteobacteria_Alphaproteobacteria_Rickettsiales_Anaplasmataceae_Wolbachia_Wolbachia sp.		PVIL-merged-M01780:105:000000000-CWNB3:1:1111:6821:11017	MK239931.1	100	402	0	0	1	402	257	658	0	743	Bacteria_Proteobacteria_Alphaproteobacteria_Rickettsiales_Anaplasmataceae_Anaplasma_Anaplasma phagocytophilum
NWSE-merged-M01780:105:000000000-CWNB3:1:2111:15016:8880	MH020205.1	99.502	402	2	0	1	402	202	603	0	732	Bacteria_Proteobacteria_Alphaproteobacteria_Rickettsiales_Anaplasmataceae_Wolbachia_Wolbachia sp.		PVIL-merged-M01780:105:000000000-CWNB3:1:1109:17382:19234	MK239931.1	100	402	0	0	1	402	257	658	0	743	Bacteria_Proteobacteria_Alphaproteobacteria_Rickettsiales_Anaplasmataceae_Anaplasma_Anaplasma phagocytophilum
NWSE-merged-M01780:105:000000000-CWNB3:1:1108:13466:5636	MH020205.1	99.005	402	4	0	1	402	202	603	0	721	Bacteria_Proteobacteria_Alphaproteobacteria_Rickettsiales_Anaplasmataceae_Wolbachia_Wolbachia sp.		PVIL-merged-M01780:105:000000000-CWNB3:1:1114:17385:8022	MK239931.1	99.751	402	1	0	1	402	257	658	0	737	Bacteria_Proteobacteria_Alphaproteobacteria_Rickettsiales_Anaplasmataceae_Anaplasma_Anaplasma phagocytophilum
NWSE-merged-M01780:105:000000000-CWNB3:1:1115:22091:8407	MH020205.1	99.751	402	1	0	1	402	202	603	0	737	Bacteria_Proteobacteria_Alphaproteobacteria_Rickettsiales_Anaplasmataceae_Wolbachia_Wolbachia sp.		PVIL-merged-M01780:105:000000000-CWNB3:1:1115:9117:12478	MK239931.1	100	402	0	0	1	402	257	658	0	743	Bacteria_Proteobacteria_Alphaproteobacteria_Rickettsiales_Anaplasmataceae_Anaplasma_Anaplasma phagocytophilum
NWSE-merged-M01780:105:000000000-CWNB3:1:2107:15740:5755	MH020205.1	99.751	402	1	0	1	402	202	603	0	737	Bacteria_Proteobacteria_Alphaproteobacteria_Rickettsiales_Anaplasmataceae_Wolbachia_Wolbachia sp.		PVIL-merged-M01780:105:000000000-CWNB3:1:1118:6523:14382	MK239931.1	100	402	0	0	1	402	257	658	0	743	Bacteria_Proteobacteria_Alphaproteobacteria_Rickettsiales_Anaplasmataceae_Anaplasma_Anaplasma phagocytophilum
NWSE-merged-M01780:105:000000000-CWNB3:1:2108:16404:8767	MH020205.1	99.751	402	1	0	1	402	202	603	0	737	Bacteria_Proteobacteria_Alphaproteobacteria_Rickettsiales_Anaplasmataceae_Wolbachia_Wolbachia sp.		PVIL-merged-M01780:105:000000000-CWNB3:1:2103:12730:15016	MK239931.1	100	402	0	0	1	402	257	658	0	743	Bacteria_Proteobacteria_Alphaproteobacteria_Rickettsiales_Anaplasmataceae_Anaplasma_Anaplasma phagocytophilum
NWSE-merged-M01780:105:000000000-CWNB3:1:1107:6209:14344	MH020205.1	99.751	402	1	0	1	402	202	603	0	737	Bacteria_Proteobacteria_Alphaproteobacteria_Rickettsiales_Anaplasmataceae_Wolbachia_Wolbachia sp.		PVIL-merged-M01780:105:000000000-CWNB3:1:2103:3174:10205	MK239931.1	94.776	402	21	0	1	402	257	658	1.75e-175	627	Bacteria_Proteobacteria_Alphaproteobacteria_Rickettsiales_Anaplasmataceae_Anaplasma_Anaplasma phagocytophilum
NWSE-merged-M01780:105:000000000-CWNB3:1:2105:18236:14785	MH020205.1	99.751	402	1	0	1	402	202	603	0	737	Bacteria_Proteobacteria_Alphaproteobacteria_Rickettsiales_Anaplasmataceae_Wolbachia_Wolbachia sp.		PVIL-merged-M01780:105:000000000-CWNB3:1:2105:22622:5473	MK239931.1	99.254	402	3	0	1	402	257	658	0	726	Bacteria_Proteobacteria_Alphaproteobacteria_Rickettsiales_Anaplasmataceae_Anaplasma_Anaplasma phagocytophilum
NWSE-merged-M01780:105:000000000-CWNB3:1:2102:25311:20096	MH020205.1	99.254	402	3	0	1	402	202	603	0	726	Bacteria_Proteobacteria_Alphaproteobacteria_Rickettsiales_Anaplasmataceae_Wolbachia_Wolbachia sp.		PVIL-merged-M01780:105:000000000-CWNB3:1:2108:4894:13434	MK239931.1	100	402	0	0	1	402	257	658	0	743	Bacteria_Proteobacteria_Alphaproteobacteria_Rickettsiales_Anaplasmataceae_Anaplasma_Anaplasma phagocytophilum
NWSE-merged-M01780:105:000000000-CWNB3:1:2105:19000:12227	MH020205.1	98.01	402	8	0	1	402	202	603	0	699	Bacteria_Proteobacteria_Alphaproteobacteria_Rickettsiales_Anaplasmataceae_Wolbachia_Wolbachia sp.		PVIL-merged-M01780:105:000000000-CWNB3:1:2113:12302:16915	MK239931.1	100	400	0	0	2	401	259	658	0	739	Bacteria_Proteobacteria_Alphaproteobacteria_Rickettsiales_Anaplasmataceae_Anaplasma_Anaplasma phagocytophilum
NWSE-merged-M01780:105:000000000-CWNB3:1:1111:19279:9963	MH020205.1	99.751	402	1	0	1	402	202	603	0	737	Bacteria_Proteobacteria_Alphaproteobacteria_Rickettsiales_Anaplasmataceae_Wolbachia_Wolbachia sp.		PVIL-merged-M01780:105:000000000-CWNB3:1:2114:3948:18315	MK239931.1	99.005	402	4	0	1	402	257	658	0	721	Bacteria_Proteobacteria_Alphaproteobacteria_Rickettsiales_Anaplasmataceae_Anaplasma_Anaplasma phagocytophilum
NWSE-merged-M01780:105:000000000-CWNB3:1:1119:27754:14927	MH020205.1	98.507	402	6	0	1	402	202	603	0	710	Bacteria_Proteobacteria_Alphaproteobacteria_Rickettsiales_Anaplasmataceae_Wolbachia_Wolbachia sp.		PVIL-merged-M01780:105:000000000-CWNB3:1:2118:11310:20792	MK239931.1	99.254	402	3	0	1	402	257	658	0	726	Bacteria_Proteobacteria_Alphaproteobacteria_Rickettsiales_Anaplasmataceae_Anaplasma_Anaplasma phagocytophilum
NWSE-merged-M01780:105:000000000-CWNB3:1:1112:22143:15921	MH020205.1	99.502	402	2	0	1	402	202	603	0	732	Bacteria_Proteobacteria_Alphaproteobacteria_Rickettsiales_Anaplasmataceae_Wolbachia_Wolbachia sp.		PVIL-merged-M01780:105:000000000-CWNB3:1:2118:20580:13255	MK239931.1	100	402	0	0	1	402	257	658	0	743	Bacteria_Proteobacteria_Alphaproteobacteria_Rickettsiales_Anaplasmataceae_Anaplasma_Anaplasma phagocytophilum
NWSE-merged-M01780:105:000000000-CWNB3:1:2109:21740:22165	MH020205.1	99.017	407	4	0	1	407	197	603	0	730	Bacteria_Proteobacteria_Alphaproteobacteria_Rickettsiales_Anaplasmataceae_Wolbachia_Wolbachia sp.		PVIL-merged-M01780:105:000000000-CWNB3:1:2118:22330:3347	MK239931.1	97.264	402	11	0	1	402	257	658	0	684	Bacteria_Proteobacteria_Alphaproteobacteria_Rickettsiales_Anaplasmataceae_Anaplasma_Anaplasma phagocytophilum
NWSE-merged-M01780:105:000000000-CWNB3:1:1101:13333:7786	MH020205.1	99.502	402	1	1	1	401	202	603	0	730	Bacteria_Proteobacteria_Alphaproteobacteria_Rickettsiales_Anaplasmataceae_Wolbachia_Wolbachia sp.		PVIL-merged-M01780:105:000000000-CWNB3:1:2118:22981:22630	MK239931.1	100	402	0	0	1	402	257	658	0	743	Bacteria_Proteobacteria_Alphaproteobacteria_Rickettsiales_Anaplasmataceae_Anaplasma_Anaplasma phagocytophilum
NWSE-merged-M01780:105:000000000-CWNB3:1:1112:10692:24191	MH020205.1	99.254	402	3	0	1	402	202	603	0	726	Bacteria_Proteobacteria_Alphaproteobacteria_Rickettsiales_Anaplasmataceae_Wolbachia_Wolbachia sp.		PVIL-merged-M01780:105:000000000-CWNB3:1:1101:11678:24219	MK239931.1	99.254	402	3	0	1	402	257	658	0	726	Bacteria_Proteobacteria_Alphaproteobacteria_Rickettsiales_Anaplasmataceae_Anaplasma_Anaplasma phagocytophilum
NWSE-merged-M01780:105:000000000-CWNB3:1:2101:17667:15577	MH020205.1	99.751	402	1	0	1	402	202	603	0	737	Bacteria_Proteobacteria_Alphaproteobacteria_Rickettsiales_Anaplasmataceae_Wolbachia_Wolbachia sp.		PVIL-merged-M01780:105:000000000-CWNB3:1:1103:21682:17881	MK239931.1	100	402	0	0	1	402	257	658	0	743	Bacteria_Proteobacteria_Alphaproteobacteria_Rickettsiales_Anaplasmataceae_Anaplasma_Anaplasma phagocytophilum
NWSE-merged-M01780:105:000000000-CWNB3:1:2110:12108:20313	MH020205.1	99.502	402	2	0	1	402	202	603	0	732	Bacteria_Proteobacteria_Alphaproteobacteria_Rickettsiales_Anaplasmataceae_Wolbachia_Wolbachia sp.		PVIL-merged-M01780:105:000000000-CWNB3:1:1101:8500:14201	MK239931.1	100	402	0	0	1	402	257	658	0	743	Bacteria_Proteobacteria_Alphaproteobacteria_Rickettsiales_Anaplasmataceae_Anaplasma_Anaplasma phagocytophilum
NWSE-merged-M01780:105:000000000-CWNB3:1:2119:9911:22299	MH020205.1	99.751	402	1	0	1	402	202	603	0	737	Bacteria_Proteobacteria_Alphaproteobacteria_Rickettsiales_Anaplasmataceae_Wolbachia_Wolbachia sp.		PVIL-merged-M01780:105:000000000-CWNB3:1:1101:20293:22032	MK239931.1	98.504	401	6	0	1	401	257	657	0	708	Bacteria_Proteobacteria_Alphaproteobacteria_Rickettsiales_Anaplasmataceae_Anaplasma_Anaplasma phagocytophilum
NWSE-merged-M01780:105:000000000-CWNB3:1:1111:14693:1884	MH020205.1	99.502	402	2	0	1	402	202	603	0	734	Bacteria_Proteobacteria_Alphaproteobacteria_Rickettsiales_Anaplasmataceae_Wolbachia_Wolbachia sp.		PVIL-merged-M01780:105:000000000-CWNB3:1:1108:3536:14858	MK239931.1	100	402	0	0	1	402	257	658	0	743	Bacteria_Proteobacteria_Alphaproteobacteria_Rickettsiales_Anaplasmataceae_Anaplasma_Anaplasma phagocytophilum
NWSE-merged-M01780:105:000000000-CWNB3:1:1110:28608:11453	MH020205.1	99.005	402	4	0	1	402	202	603	0	721	Bacteria_Proteobacteria_Alphaproteobacteria_Rickettsiales_Anaplasmataceae_Wolbachia_Wolbachia sp.		PVIL-merged-M01780:105:000000000-CWNB3:1:1107:13985:21574	MK239931.1	100	402	0	0	1	402	257	658	0	743	Bacteria_Proteobacteria_Alphaproteobacteria_Rickettsiales_Anaplasmataceae_Anaplasma_Anaplasma phagocytophilum
NWSE-merged-M01780:105:000000000-CWNB3:1:1113:2680:9468	MH020205.1	99.502	402	2	0	1	402	202	603	0	732	Bacteria_Proteobacteria_Alphaproteobacteria_Rickettsiales_Anaplasmataceae_Wolbachia_Wolbachia sp.		PVIL-merged-M01780:105:000000000-CWNB3:1:1110:9619:8347	MK239931.1	100	402	0	0	1	402	257	658	0	743	Bacteria_Proteobacteria_Alphaproteobacteria_Rickettsiales_Anaplasmataceae_Anaplasma_Anaplasma phagocytophilum
NWSE-merged-M01780:105:000000000-CWNB3:1:1117:21018:8051	MH020205.1	99.751	402	1	0	1	402	202	603	0	737	Bacteria_Proteobacteria_Alphaproteobacteria_Rickettsiales_Anaplasmataceae_Wolbachia_Wolbachia sp.		PVIL-merged-M01780:105:000000000-CWNB3:1:1113:10094:22838	MK239931.1	99.751	402	1	0	1	402	257	658	0	737	Bacteria_Proteobacteria_Alphaproteobacteria_Rickettsiales_Anaplasmataceae_Anaplasma_Anaplasma phagocytophilum
NWSE-merged-M01780:105:000000000-CWNB3:1:2117:6289:17354	MH020205.1	99.751	402	1	0	1	402	202	603	0	737	Bacteria_Proteobacteria_Alphaproteobacteria_Rickettsiales_Anaplasmataceae_Wolbachia_Wolbachia sp.		PVIL-merged-M01780:105:000000000-CWNB3:1:1114:26395:16506	MK239931.1	100	402	0	0	1	402	257	658	0	743	Bacteria_Proteobacteria_Alphaproteobacteria_Rickettsiales_Anaplasmataceae_Anaplasma_Anaplasma phagocytophilum
NWSE-merged-M01780:105:000000000-CWNB3:1:2103:26146:18816	MH020205.1	98.507	402	6	0	1	402	202	603	0	710	Bacteria_Proteobacteria_Alphaproteobacteria_Rickettsiales_Anaplasmataceae_Wolbachia_Wolbachia sp.		PVIL-merged-M01780:105:000000000-CWNB3:1:1119:15665:20255	MK239931.1	99.751	402	1	0	1	402	257	658	0	737	Bacteria_Proteobacteria_Alphaproteobacteria_Rickettsiales_Anaplasmataceae_Anaplasma_Anaplasma phagocytophilum
NWSE-merged-M01780:105:000000000-CWNB3:1:2119:23650:5919	MH020205.1	99.502	402	2	0	1	402	202	603	0	732	Bacteria_Proteobacteria_Alphaproteobacteria_Rickettsiales_Anaplasmataceae_Wolbachia_Wolbachia sp.		PVIL-merged-M01780:105:000000000-CWNB3:1:2103:12923:14820	MK239931.1	99.502	402	2	0	1	402	257	658	0	732	Bacteria_Proteobacteria_Alphaproteobacteria_Rickettsiales_Anaplasmataceae_Anaplasma_Anaplasma phagocytophilum
NWSE-merged-M01780:105:000000000-CWNB3:1:2104:16071:3037	MH020205.1	99.751	402	1	0	1	402	202	603	0	737	Bacteria_Proteobacteria_Alphaproteobacteria_Rickettsiales_Anaplasmataceae_Wolbachia_Wolbachia sp.		PVIL-merged-M01780:105:000000000-CWNB3:1:2107:27093:9585	MK239931.1	100	402	0	0	1	402	257	658	0	743	Bacteria_Proteobacteria_Alphaproteobacteria_Rickettsiales_Anaplasmataceae_Anaplasma_Anaplasma phagocytophilum
NWSE-merged-M01780:105:000000000-CWNB3:1:1116:14522:22225	MH020205.1	99.751	402	1	0	1	402	202	603	0	737	Bacteria_Proteobacteria_Alphaproteobacteria_Rickettsiales_Anaplasmataceae_Wolbachia_Wolbachia sp.		PVIL-merged-M01780:105:000000000-CWNB3:1:2109:18705:4472	MK239931.1	99.254	402	3	0	1	402	257	658	0	726	Bacteria_Proteobacteria_Alphaproteobacteria_Rickettsiales_Anaplasmataceae_Anaplasma_Anaplasma phagocytophilum
NWSE-merged-M01780:105:000000000-CWNB3:1:1102:10996:1886	MH020205.1	99.005	402	4	0	1	402	202	603	0	721	Bacteria_Proteobacteria_Alphaproteobacteria_Rickettsiales_Anaplasmataceae_Wolbachia_Wolbachia sp.		PVIL-merged-M01780:105:000000000-CWNB3:1:2110:14943:9522	MK239931.1	99.751	402	1	0	1	402	257	658	0	737	Bacteria_Proteobacteria_Alphaproteobacteria_Rickettsiales_Anaplasmataceae_Anaplasma_Anaplasma phagocytophilum
NWSE-merged-M01780:105:000000000-CWNB3:1:1118:13851:24020	MH020205.1	99.751	402	1	0	1	402	202	603	0	737	Bacteria_Proteobacteria_Alphaproteobacteria_Rickettsiales_Anaplasmataceae_Wolbachia_Wolbachia sp.		PVIL-merged-M01780:105:000000000-CWNB3:1:2117:7543:16539	MK239931.1	100	409	0	0	1	409	257	665	0	756	Bacteria_Proteobacteria_Alphaproteobacteria_Rickettsiales_Anaplasmataceae_Anaplasma_Anaplasma phagocytophilum
NWSE-merged-M01780:105:000000000-CWNB3:1:2102:14002:23557	MH020205.1	99.502	402	2	0	1	402	202	603	0	732	Bacteria_Proteobacteria_Alphaproteobacteria_Rickettsiales_Anaplasmataceae_Wolbachia_Wolbachia sp.		PVIL-merged-M01780:105:000000000-CWNB3:1:1102:3375:19357	MK239931.1	99.502	402	2	0	1	402	257	658	0	732	Bacteria_Proteobacteria_Alphaproteobacteria_Rickettsiales_Anaplasmataceae_Anaplasma_Anaplasma phagocytophilum
NWSE-merged-M01780:105:000000000-CWNB3:1:2113:20048:9219	MH020205.1	99.254	402	3	0	1	402	202	603	0	726	Bacteria_Proteobacteria_Alphaproteobacteria_Rickettsiales_Anaplasmataceae_Wolbachia_Wolbachia sp.		PVIL-merged-M01780:105:000000000-CWNB3:1:1104:28477:16371	MK239931.1	100	402	0	0	1	402	257	658	0	743	Bacteria_Proteobacteria_Alphaproteobacteria_Rickettsiales_Anaplasmataceae_Anaplasma_Anaplasma phagocytophilum
NWSE-merged-M01780:105:000000000-CWNB3:1:1114:4235:11618	MH020205.1	96.766	402	13	0	1	402	202	603	0	671	Bacteria_Proteobacteria_Alphaproteobacteria_Rickettsiales_Anaplasmataceae_Wolbachia_Wolbachia sp.		PVIL-merged-M01780:105:000000000-CWNB3:1:1105:8264:6934	MK239931.1	100	402	0	0	1	402	257	658	0	743	Bacteria_Proteobacteria_Alphaproteobacteria_Rickettsiales_Anaplasmataceae_Anaplasma_Anaplasma phagocytophilum
NWSE-merged-M01780:105:000000000-CWNB3:1:2119:15745:9659	MH020205.1	99.751	402	1	0	1	402	202	603	0	737	Bacteria_Proteobacteria_Alphaproteobacteria_Rickettsiales_Anaplasmataceae_Wolbachia_Wolbachia sp.		PVIL-merged-M01780:105:000000000-CWNB3:1:1106:17762:24664	MK239931.1	95.642	413	18	0	1	413	257	669	0	664	Bacteria_Proteobacteria_Alphaproteobacteria_Rickettsiales_Anaplasmataceae_Anaplasma_Anaplasma phagocytophilum
NWSE-merged-M01780:105:000000000-CWNB3:1:1116:24889:9281	MH020205.1	99.751	402	1	0	1	402	202	603	0	737	Bacteria_Proteobacteria_Alphaproteobacteria_Rickettsiales_Anaplasmataceae_Wolbachia_Wolbachia sp.		PVIL-merged-M01780:105:000000000-CWNB3:1:1108:8229:11903	MK239931.1	100	402	0	0	1	402	257	658	0	743	Bacteria_Proteobacteria_Alphaproteobacteria_Rickettsiales_Anaplasmataceae_Anaplasma_Anaplasma phagocytophilum
NWSE-merged-M01780:105:000000000-CWNB3:1:2104:8487:20718	MH020205.1	98.507	402	6	0	1	402	202	603	0	710	Bacteria_Proteobacteria_Alphaproteobacteria_Rickettsiales_Anaplasmataceae_Wolbachia_Wolbachia sp.		PVIL-merged-M01780:105:000000000-CWNB3:1:1106:13262:19303	MK239931.1	99.751	402	1	0	1	402	257	658	0	737	Bacteria_Proteobacteria_Alphaproteobacteria_Rickettsiales_Anaplasmataceae_Anaplasma_Anaplasma phagocytophilum
NWSE-merged-M01780:105:000000000-CWNB3:1:2116:17502:18445	MH020205.1	99.502	402	2	0	1	402	202	603	0	732	Bacteria_Proteobacteria_Alphaproteobacteria_Rickettsiales_Anaplasmataceae_Wolbachia_Wolbachia sp.		PVIL-merged-M01780:105:000000000-CWNB3:1:1110:12668:11596	MK239931.1	100	402	0	0	1	402	257	658	0	743	Bacteria_Proteobacteria_Alphaproteobacteria_Rickettsiales_Anaplasmataceae_Anaplasma_Anaplasma phagocytophilum
NWSE-merged-M01780:105:000000000-CWNB3:1:2107:7951:5344	MH020205.1	98.504	401	6	0	2	402	203	603	0	708	Bacteria_Proteobacteria_Alphaproteobacteria_Rickettsiales_Anaplasmataceae_Wolbachia_Wolbachia sp.		PVIL-merged-M01780:105:000000000-CWNB3:1:1112:8220:11494	MK239931.1	100	402	0	0	1	402	257	658	0	743	Bacteria_Proteobacteria_Alphaproteobacteria_Rickettsiales_Anaplasmataceae_Anaplasma_Anaplasma phagocytophilum
NWSE-merged-M01780:105:000000000-CWNB3:1:2119:21496:24671	MH020205.1	99.254	402	3	0	1	402	202	603	0	726	Bacteria_Proteobacteria_Alphaproteobacteria_Rickettsiales_Anaplasmataceae_Wolbachia_Wolbachia sp.		PVIL-merged-M01780:105:000000000-CWNB3:1:1114:27403:9848	MK239931.1	99.502	402	2	0	1	402	257	658	0	732	Bacteria_Proteobacteria_Alphaproteobacteria_Rickettsiales_Anaplasmataceae_Anaplasma_Anaplasma phagocytophilum
NWSE-merged-M01780:105:000000000-CWNB3:1:2103:23994:20767	MH020205.1	98.034	407	8	0	1	407	197	603	0	708	Bacteria_Proteobacteria_Alphaproteobacteria_Rickettsiales_Anaplasmataceae_Wolbachia_Wolbachia sp.		PVIL-merged-M01780:105:000000000-CWNB3:1:1116:27205:20435	MK239931.1	98.259	402	7	0	1	402	257	658	0	704	Bacteria_Proteobacteria_Alphaproteobacteria_Rickettsiales_Anaplasmataceae_Anaplasma_Anaplasma phagocytophilum
NWSE-merged-M01780:105:000000000-CWNB3:1:2105:13003:15570	MH020205.1	99.254	402	3	0	1	402	202	603	0	726	Bacteria_Proteobacteria_Alphaproteobacteria_Rickettsiales_Anaplasmataceae_Wolbachia_Wolbachia sp.		PVIL-merged-M01780:105:000000000-CWNB3:1:1117:19896:8781	MK239931.1	100	402	0	0	1	402	257	658	0	743	Bacteria_Proteobacteria_Alphaproteobacteria_Rickettsiales_Anaplasmataceae_Anaplasma_Anaplasma phagocytophilum
NWSE-merged-M01780:105:000000000-CWNB3:1:2107:6157:15815	MH020205.1	99.502	402	2	0	1	402	202	603	0	732	Bacteria_Proteobacteria_Alphaproteobacteria_Rickettsiales_Anaplasmataceae_Wolbachia_Wolbachia sp.		PVIL-merged-M01780:105:000000000-CWNB3:1:2102:20077:16112	MK239931.1	100	402	0	0	1	402	257	658	0	743	Bacteria_Proteobacteria_Alphaproteobacteria_Rickettsiales_Anaplasmataceae_Anaplasma_Anaplasma phagocytophilum
NWSE-merged-M01780:105:000000000-CWNB3:1:2101:16347:8897	MH020205.1	99.751	402	1	0	1	402	202	603	0	737	Bacteria_Proteobacteria_Alphaproteobacteria_Rickettsiales_Anaplasmataceae_Wolbachia_Wolbachia sp.		PVIL-merged-M01780:105:000000000-CWNB3:1:2107:22638:12179	MK239931.1	100	402	0	0	1	402	257	658	0	743	Bacteria_Proteobacteria_Alphaproteobacteria_Rickettsiales_Anaplasmataceae_Anaplasma_Anaplasma phagocytophilum
NWSE-merged-M01780:105:000000000-CWNB3:1:1116:13044:11063	MH020205.1	99.751	402	1	0	1	402	202	603	0	737	Bacteria_Proteobacteria_Alphaproteobacteria_Rickettsiales_Anaplasmataceae_Wolbachia_Wolbachia sp.		PVIL-merged-M01780:105:000000000-CWNB3:1:2110:16907:20178	MK239931.1	98.507	402	6	0	1	402	257	658	0	710	Bacteria_Proteobacteria_Alphaproteobacteria_Rickettsiales_Anaplasmataceae_Anaplasma_Anaplasma phagocytophilum
NWSE-merged-M01780:105:000000000-CWNB3:1:2108:28315:9517	MH020205.1	99.751	402	1	0	1	402	202	603	0	737	Bacteria_Proteobacteria_Alphaproteobacteria_Rickettsiales_Anaplasmataceae_Wolbachia_Wolbachia sp.		PVIL-merged-M01780:105:000000000-CWNB3:1:2110:14036:6017	MK239931.1	99.502	402	2	0	1	402	257	658	0	732	Bacteria_Proteobacteria_Alphaproteobacteria_Rickettsiales_Anaplasmataceae_Anaplasma_Anaplasma phagocytophilum
NWSE-merged-M01780:105:000000000-CWNB3:1:2102:8900:16498	MH020205.1	99.005	402	4	0	1	402	202	603	0	721	Bacteria_Proteobacteria_Alphaproteobacteria_Rickettsiales_Anaplasmataceae_Wolbachia_Wolbachia sp.		PVIL-merged-M01780:105:000000000-CWNB3:1:2116:11083:11239	MK239931.1	99.254	402	3	0	1	402	257	658	0	726	Bacteria_Proteobacteria_Alphaproteobacteria_Rickettsiales_Anaplasmataceae_Anaplasma_Anaplasma phagocytophilum
NWSE-merged-M01780:105:000000000-CWNB3:1:1101:27402:16285	MH020205.1	99.751	402	1	0	1	402	202	603	0	737	Bacteria_Proteobacteria_Alphaproteobacteria_Rickettsiales_Anaplasmataceae_Wolbachia_Wolbachia sp.		PVIL-merged-M01780:105:000000000-CWNB3:1:1101:9384:7989	MK239931.1	99.751	402	1	0	1	402	257	658	0	737	Bacteria_Proteobacteria_Alphaproteobacteria_Rickettsiales_Anaplasmataceae_Anaplasma_Anaplasma phagocytophilum
NWSE-merged-M01780:105:000000000-CWNB3:1:1107:28315:14860	MH020205.1	99.751	402	1	0	1	402	202	603	0	737	Bacteria_Proteobacteria_Alphaproteobacteria_Rickettsiales_Anaplasmataceae_Wolbachia_Wolbachia sp.		PVIL-merged-M01780:105:000000000-CWNB3:1:1103:21750:24069	MK239931.1	100	402	0	0	1	402	257	658	0	743	Bacteria_Proteobacteria_Alphaproteobacteria_Rickettsiales_Anaplasmataceae_Anaplasma_Anaplasma phagocytophilum
NWSE-merged-M01780:105:000000000-CWNB3:1:2114:21147:19149	MH020205.1	99.751	402	1	0	1	402	202	603	0	737	Bacteria_Proteobacteria_Alphaproteobacteria_Rickettsiales_Anaplasmataceae_Wolbachia_Wolbachia sp.		PVIL-merged-M01780:105:000000000-CWNB3:1:1105:18878:3204	MK239931.1	100	402	0	0	1	402	257	658	0	743	Bacteria_Proteobacteria_Alphaproteobacteria_Rickettsiales_Anaplasmataceae_Anaplasma_Anaplasma phagocytophilum
NWSE-merged-M01780:105:000000000-CWNB3:1:1102:14091:3454	MH020205.1	99.254	402	3	0	1	402	202	603	0	726	Bacteria_Proteobacteria_Alphaproteobacteria_Rickettsiales_Anaplasmataceae_Wolbachia_Wolbachia sp.		PVIL-merged-M01780:105:000000000-CWNB3:1:1108:12451:9059	MK239931.1	100	402	0	0	1	402	257	658	0	743	Bacteria_Proteobacteria_Alphaproteobacteria_Rickettsiales_Anaplasmataceae_Anaplasma_Anaplasma phagocytophilum
NWSE-merged-M01780:105:000000000-CWNB3:1:1103:13678:3893	MH020205.1	99.502	402	2	0	1	402	202	603	0	732	Bacteria_Proteobacteria_Alphaproteobacteria_Rickettsiales_Anaplasmataceae_Wolbachia_Wolbachia sp.		PVIL-merged-M01780:105:000000000-CWNB3:1:1111:18848:7179	MK239931.1	100	402	0	0	1	402	257	658	0	743	Bacteria_Proteobacteria_Alphaproteobacteria_Rickettsiales_Anaplasmataceae_Anaplasma_Anaplasma phagocytophilum
NWSE-merged-M01780:105:000000000-CWNB3:1:1109:23276:11057	MH020205.1	99.502	402	2	0	1	402	202	603	0	732	Bacteria_Proteobacteria_Alphaproteobacteria_Rickettsiales_Anaplasmataceae_Wolbachia_Wolbachia sp.		PVIL-merged-M01780:105:000000000-CWNB3:1:1115:9419:19829	MK239931.1	99.254	402	3	0	1	402	257	658	0	726	Bacteria_Proteobacteria_Alphaproteobacteria_Rickettsiales_Anaplasmataceae_Anaplasma_Anaplasma phagocytophilum
NWSE-merged-M01780:105:000000000-CWNB3:1:1102:15790:9583	MT535574.1	99.005	402	4	0	1	402	257	658	0	721	Bacteria_Proteobacteria_Alphaproteobacteria_Rickettsiales_Rickettsiaceae_Rickettsia_Candidatus Rickettsia longicornii		PVIL-merged-M01780:105:000000000-CWNB3:1:2101:11324:10542	MN227385.1	97.015	402	12	0	1	402	64	465	0	676	Bacteria_Proteobacteria_Alphaproteobacteria_Rickettsiales_Anaplasmataceae_Anaplasma_Anaplasma phagocytophilum
NWSE-merged-M01780:105:000000000-CWNB3:1:1112:22427:3843	MT535574.1	98.507	402	6	0	1	402	257	658	0	710	Bacteria_Proteobacteria_Alphaproteobacteria_Rickettsiales_Rickettsiaceae_Rickettsia_Candidatus Rickettsia longicornii		PVIL-merged-M01780:105:000000000-CWNB3:1:2102:12655:19083	AY969012.1	95.771	402	17	0	1	402	311	712	0	649	Bacteria_Proteobacteria_Alphaproteobacteria_Rickettsiales_Anaplasmataceae_Anaplasma_Anaplasma phagocytophilum
NWSE-merged-M01780:105:000000000-CWNB3:1:1112:13707:22332	MT535574.1	98.01	402	8	0	1	402	257	658	0	699	Bacteria_Proteobacteria_Alphaproteobacteria_Rickettsiales_Rickettsiaceae_Rickettsia_Candidatus Rickettsia longicornii		PVIL-merged-M01780:105:000000000-CWNB3:1:2107:10426:6296	AY969012.1	96.359	412	15	0	1	412	311	722	0	678	Bacteria_Proteobacteria_Alphaproteobacteria_Rickettsiales_Anaplasmataceae_Anaplasma_Anaplasma phagocytophilum
NWSE-merged-M01780:105:000000000-CWNB3:1:1113:11362:22776	MT535574.1	99.254	402	3	0	1	402	257	658	0	726	Bacteria_Proteobacteria_Alphaproteobacteria_Rickettsiales_Rickettsiaceae_Rickettsia_Candidatus Rickettsia longicornii		PVIL-merged-M01780:105:000000000-CWNB3:1:2108:7905:9241	MK239931.1	100	402	0	0	1	402	257	658	0	743	Bacteria_Proteobacteria_Alphaproteobacteria_Rickettsiales_Anaplasmataceae_Anaplasma_Anaplasma phagocytophilum
NWSE-merged-M01780:105:000000000-CWNB3:1:1115:6666:11354	MT535574.1	98.01	402	8	0	1	402	257	658	0	701	Bacteria_Proteobacteria_Alphaproteobacteria_Rickettsiales_Rickettsiaceae_Rickettsia_Candidatus Rickettsia longicornii		PVIL-merged-M01780:105:000000000-CWNB3:1:2115:18323:17205	MK239931.1	100	402	0	0	1	402	257	658	0	743	Bacteria_Proteobacteria_Alphaproteobacteria_Rickettsiales_Anaplasmataceae_Anaplasma_Anaplasma phagocytophilum
NWSE-merged-M01780:105:000000000-CWNB3:1:1117:22579:3537	MT535574.1	98.507	402	6	0	1	402	257	658	0	710	Bacteria_Proteobacteria_Alphaproteobacteria_Rickettsiales_Rickettsiaceae_Rickettsia_Candidatus Rickettsia longicornii		PVIL-merged-M01780:105:000000000-CWNB3:1:2118:8629:2717	MK239931.1	99.005	402	4	0	1	402	257	658	0	721	Bacteria_Proteobacteria_Alphaproteobacteria_Rickettsiales_Anaplasmataceae_Anaplasma_Anaplasma phagocytophilum
NWSE-merged-M01780:105:000000000-CWNB3:1:1119:19583:21976	MT535574.1	97.761	402	9	0	1	402	257	658	0	693	Bacteria_Proteobacteria_Alphaproteobacteria_Rickettsiales_Rickettsiaceae_Rickettsia_Candidatus Rickettsia longicornii		PVIL-merged-M01780:105:000000000-CWNB3:1:2119:17166:5977	MK239931.1	100	402	0	0	1	402	257	658	0	743	Bacteria_Proteobacteria_Alphaproteobacteria_Rickettsiales_Anaplasmataceae_Anaplasma_Anaplasma phagocytophilum
NWSE-merged-M01780:105:000000000-CWNB3:1:2105:28575:11977	MT535574.1	98.01	402	8	0	1	402	257	658	0	699	Bacteria_Proteobacteria_Alphaproteobacteria_Rickettsiales_Rickettsiaceae_Rickettsia_Candidatus Rickettsia longicornii		PVIL-merged-M01780:105:000000000-CWNB3:1:2118:18838:19878	MK239931.1	100	402	0	0	1	402	257	658	0	743	Bacteria_Proteobacteria_Alphaproteobacteria_Rickettsiales_Anaplasmataceae_Anaplasma_Anaplasma phagocytophilum
NWSE-merged-M01780:105:000000000-CWNB3:1:2105:10698:23382	MT535574.1	97.512	402	9	1	1	401	257	658	0	686	Bacteria_Proteobacteria_Alphaproteobacteria_Rickettsiales_Rickettsiaceae_Rickettsia_Candidatus Rickettsia longicornii		PVIL-merged-M01780:105:000000000-CWNB3:1:1107:14549:19311	MK239931.1	100	412	0	0	1	412	257	668	0	761	Bacteria_Proteobacteria_Alphaproteobacteria_Rickettsiales_Anaplasmataceae_Anaplasma_Anaplasma phagocytophilum
NWSE-merged-M01780:105:000000000-CWNB3:1:2116:25354:15666	MT535574.1	97.579	413	10	0	1	413	257	669	0	708	Bacteria_Proteobacteria_Alphaproteobacteria_Rickettsiales_Rickettsiaceae_Rickettsia_Candidatus Rickettsia longicornii		PVIL-merged-M01780:105:000000000-CWNB3:1:1109:16425:4583	MK239931.1	100	402	0	0	1	402	257	658	0	743	Bacteria_Proteobacteria_Alphaproteobacteria_Rickettsiales_Anaplasmataceae_Anaplasma_Anaplasma phagocytophilum
NWSE-merged-M01780:105:000000000-CWNB3:1:1110:15656:22590	MT535574.1	98.01	402	8	0	1	402	257	658	0	699	Bacteria_Proteobacteria_Alphaproteobacteria_Rickettsiales_Rickettsiaceae_Rickettsia_Candidatus Rickettsia longicornii		PVIL-merged-M01780:105:000000000-CWNB3:1:1109:12965:23371	MK239931.1	100	402	0	0	1	402	257	658	0	743	Bacteria_Proteobacteria_Alphaproteobacteria_Rickettsiales_Anaplasmataceae_Anaplasma_Anaplasma phagocytophilum
NWSE-merged-M01780:105:000000000-CWNB3:1:2108:22465:12543	MT535574.1	98.259	402	7	0	1	402	257	658	0	704	Bacteria_Proteobacteria_Alphaproteobacteria_Rickettsiales_Rickettsiaceae_Rickettsia_Candidatus Rickettsia longicornii		PVIL-merged-M01780:105:000000000-CWNB3:1:1109:21780:9181	MK239931.1	100	402	0	0	1	402	257	658	0	743	Bacteria_Proteobacteria_Alphaproteobacteria_Rickettsiales_Anaplasmataceae_Anaplasma_Anaplasma phagocytophilum
NWSE-merged-M01780:105:000000000-CWNB3:1:2109:28367:18431	MT535574.1	98.771	407	5	0	1	407	252	658	0	725	Bacteria_Proteobacteria_Alphaproteobacteria_Rickettsiales_Rickettsiaceae_Rickettsia_Candidatus Rickettsia longicornii		PVIL-merged-M01780:105:000000000-CWNB3:1:1113:27321:13742	MK239931.1	100	402	0	0	1	402	257	658	0	743	Bacteria_Proteobacteria_Alphaproteobacteria_Rickettsiales_Anaplasmataceae_Anaplasma_Anaplasma phagocytophilum
NWSE-merged-M01780:105:000000000-CWNB3:1:2116:12747:20589	MT535574.1	99.254	402	3	0	1	402	257	658	0	726	Bacteria_Proteobacteria_Alphaproteobacteria_Rickettsiales_Rickettsiaceae_Rickettsia_Candidatus Rickettsia longicornii		PVIL-merged-M01780:105:000000000-CWNB3:1:1118:4292:6814	MK239931.1	99.502	402	2	0	1	402	257	658	0	732	Bacteria_Proteobacteria_Alphaproteobacteria_Rickettsiales_Anaplasmataceae_Anaplasma_Anaplasma phagocytophilum
NWSE-merged-M01780:105:000000000-CWNB3:1:2116:17086:17951	MT535574.1	98.507	402	6	0	1	402	257	658	0	710	Bacteria_Proteobacteria_Alphaproteobacteria_Rickettsiales_Rickettsiaceae_Rickettsia_Candidatus Rickettsia longicornii		PVIL-merged-M01780:105:000000000-CWNB3:1:1117:17596:4913	MK239931.1	99.751	402	1	0	1	402	257	658	0	737	Bacteria_Proteobacteria_Alphaproteobacteria_Rickettsiales_Anaplasmataceae_Anaplasma_Anaplasma phagocytophilum
NWSE-merged-M01780:105:000000000-CWNB3:1:1104:11803:15195	MT535574.1	99.502	402	2	0	1	402	257	658	0	732	Bacteria_Proteobacteria_Alphaproteobacteria_Rickettsiales_Rickettsiaceae_Rickettsia_Candidatus Rickettsia longicornii		PVIL-merged-M01780:105:000000000-CWNB3:1:2101:23455:24551	MK239931.1	99.254	402	3	0	1	402	257	658	0	726	Bacteria_Proteobacteria_Alphaproteobacteria_Rickettsiales_Anaplasmataceae_Anaplasma_Anaplasma phagocytophilum
NWSE-merged-M01780:105:000000000-CWNB3:1:1102:18040:22413	MT535574.1	98.756	402	5	0	1	402	257	658	0	715	Bacteria_Proteobacteria_Alphaproteobacteria_Rickettsiales_Rickettsiaceae_Rickettsia_Candidatus Rickettsia longicornii		PVIL-merged-M01780:105:000000000-CWNB3:1:2102:21627:15113	MK239931.1	98.756	402	5	0	1	402	257	658	0	715	Bacteria_Proteobacteria_Alphaproteobacteria_Rickettsiales_Anaplasmataceae_Anaplasma_Anaplasma phagocytophilum
NWSE-merged-M01780:105:000000000-CWNB3:1:1105:24894:18937	MT535574.1	99.254	402	3	0	1	402	257	658	0	728	Bacteria_Proteobacteria_Alphaproteobacteria_Rickettsiales_Rickettsiaceae_Rickettsia_Candidatus Rickettsia longicornii		PVIL-merged-M01780:105:000000000-CWNB3:1:2102:24620:20797	MK239931.1	100	402	0	0	1	402	257	658	0	743	Bacteria_Proteobacteria_Alphaproteobacteria_Rickettsiales_Anaplasmataceae_Anaplasma_Anaplasma phagocytophilum
NWSE-merged-M01780:105:000000000-CWNB3:1:1105:13920:17172	MT535574.1	99.005	402	4	0	1	402	257	658	0	721	Bacteria_Proteobacteria_Alphaproteobacteria_Rickettsiales_Rickettsiaceae_Rickettsia_Candidatus Rickettsia longicornii		PVIL-merged-M01780:105:000000000-CWNB3:1:2104:14637:17464	MK239931.1	100	402	0	0	1	402	257	658	0	743	Bacteria_Proteobacteria_Alphaproteobacteria_Rickettsiales_Anaplasmataceae_Anaplasma_Anaplasma phagocytophilum
NWSE-merged-M01780:105:000000000-CWNB3:1:1116:18141:11946	MT535574.1	99.751	402	1	0	1	402	257	658	0	737	Bacteria_Proteobacteria_Alphaproteobacteria_Rickettsiales_Rickettsiaceae_Rickettsia_Candidatus Rickettsia longicornii		PVIL-merged-M01780:105:000000000-CWNB3:1:2108:15297:13517	AY969012.1	98.756	402	5	0	1	402	311	712	0	715	Bacteria_Proteobacteria_Alphaproteobacteria_Rickettsiales_Anaplasmataceae_Anaplasma_Anaplasma phagocytophilum
NWSE-merged-M01780:105:000000000-CWNB3:1:1117:13236:22423	MT535574.1	99.254	402	3	0	1	402	257	658	0	726	Bacteria_Proteobacteria_Alphaproteobacteria_Rickettsiales_Rickettsiaceae_Rickettsia_Candidatus Rickettsia longicornii		PVIL-merged-M01780:105:000000000-CWNB3:1:2113:7980:14296	MK239931.1	99.751	402	1	0	1	402	257	658	0	737	Bacteria_Proteobacteria_Alphaproteobacteria_Rickettsiales_Anaplasmataceae_Anaplasma_Anaplasma phagocytophilum
NWSE-merged-M01780:105:000000000-CWNB3:1:1119:16635:12822	MT535574.1	99.254	402	2	1	1	401	257	658	0	725	Bacteria_Proteobacteria_Alphaproteobacteria_Rickettsiales_Rickettsiaceae_Rickettsia_Candidatus Rickettsia longicornii		PVIL-merged-M01780:105:000000000-CWNB3:1:2114:6791:6986	MK239931.1	99.502	402	2	0	1	402	257	658	0	732	Bacteria_Proteobacteria_Alphaproteobacteria_Rickettsiales_Anaplasmataceae_Anaplasma_Anaplasma phagocytophilum
NWSE-merged-M01780:105:000000000-CWNB3:1:2115:18771:12000	MT535574.1	96.569	408	14	0	1	408	257	664	0	676	Bacteria_Proteobacteria_Alphaproteobacteria_Rickettsiales_Rickettsiaceae_Rickettsia_Candidatus Rickettsia longicornii		PVIL-merged-M01780:105:000000000-CWNB3:1:2119:18502:19290	MK239931.1	100	402	0	0	1	402	257	658	0	743	Bacteria_Proteobacteria_Alphaproteobacteria_Rickettsiales_Anaplasmataceae_Anaplasma_Anaplasma phagocytophilum
NWSE-merged-M01780:105:000000000-CWNB3:1:1113:28402:15673	MT535574.1	99.751	402	1	0	1	402	257	658	0	737	Bacteria_Proteobacteria_Alphaproteobacteria_Rickettsiales_Rickettsiaceae_Rickettsia_Candidatus Rickettsia longicornii		PVIL-merged-M01780:105:000000000-CWNB3:1:1102:12237:8613	MK239931.1	100	402	0	0	1	402	257	658	0	743	Bacteria_Proteobacteria_Alphaproteobacteria_Rickettsiales_Anaplasmataceae_Anaplasma_Anaplasma phagocytophilum
NWSE-merged-M01780:105:000000000-CWNB3:1:1110:9131:24412	MT535574.1	88.693	398	43	2	2	398	258	654	1.13e-132	484	Bacteria_Proteobacteria_Alphaproteobacteria_Rickettsiales_Rickettsiaceae_Rickettsia_Candidatus Rickettsia longicornii		PVIL-merged-M01780:105:000000000-CWNB3:1:1101:6165:15782	MK239931.1	98.756	402	5	0	1	402	257	658	0	715	Bacteria_Proteobacteria_Alphaproteobacteria_Rickettsiales_Anaplasmataceae_Anaplasma_Anaplasma phagocytophilum
NWSE-merged-M01780:105:000000000-CWNB3:1:2102:22978:9417	MT535574.1	98.259	402	7	0	1	402	257	658	0	704	Bacteria_Proteobacteria_Alphaproteobacteria_Rickettsiales_Rickettsiaceae_Rickettsia_Candidatus Rickettsia longicornii		PVIL-merged-M01780:105:000000000-CWNB3:1:1106:14340:18601	MK239931.1	100	402	0	0	1	402	257	658	0	743	Bacteria_Proteobacteria_Alphaproteobacteria_Rickettsiales_Anaplasmataceae_Anaplasma_Anaplasma phagocytophilum
NWSE-merged-M01780:105:000000000-CWNB3:1:2113:24740:18284	MT535574.1	98.756	402	5	0	1	402	257	658	0	715	Bacteria_Proteobacteria_Alphaproteobacteria_Rickettsiales_Rickettsiaceae_Rickettsia_Candidatus Rickettsia longicornii		PVIL-merged-M01780:105:000000000-CWNB3:1:1114:7542:15100	MK239931.1	99.751	402	1	0	1	402	257	658	0	737	Bacteria_Proteobacteria_Alphaproteobacteria_Rickettsiales_Anaplasmataceae_Anaplasma_Anaplasma phagocytophilum
NWSE-merged-M01780:105:000000000-CWNB3:1:2115:9371:21081	MT535574.1	97.761	402	9	0	1	402	257	658	0	693	Bacteria_Proteobacteria_Alphaproteobacteria_Rickettsiales_Rickettsiaceae_Rickettsia_Candidatus Rickettsia longicornii		PVIL-merged-M01780:105:000000000-CWNB3:1:1115:17005:6003	MK239931.1	100	402	0	0	1	402	257	658	0	743	Bacteria_Proteobacteria_Alphaproteobacteria_Rickettsiales_Anaplasmataceae_Anaplasma_Anaplasma phagocytophilum
NWSE-merged-M01780:105:000000000-CWNB3:1:1112:18797:3960	MT535574.1	97.264	402	11	0	1	402	257	658	0	682	Bacteria_Proteobacteria_Alphaproteobacteria_Rickettsiales_Rickettsiaceae_Rickettsia_Candidatus Rickettsia longicornii		PVIL-merged-M01780:105:000000000-CWNB3:1:1115:8409:16625	MK239931.1	100	402	0	0	1	402	257	658	0	743	Bacteria_Proteobacteria_Alphaproteobacteria_Rickettsiales_Anaplasmataceae_Anaplasma_Anaplasma phagocytophilum
NWSE-merged-M01780:105:000000000-CWNB3:1:1115:7594:19676	MT535574.1	96.766	402	13	0	1	402	257	658	0	671	Bacteria_Proteobacteria_Alphaproteobacteria_Rickettsiales_Rickettsiaceae_Rickettsia_Candidatus Rickettsia longicornii		PVIL-merged-M01780:105:000000000-CWNB3:1:1119:6292:4850	MK239931.1	100	402	0	0	1	402	257	658	0	743	Bacteria_Proteobacteria_Alphaproteobacteria_Rickettsiales_Anaplasmataceae_Anaplasma_Anaplasma phagocytophilum
NWSE-merged-M01780:105:000000000-CWNB3:1:1116:2607:11497	MT535574.1	98.259	402	7	0	1	402	257	658	0	704	Bacteria_Proteobacteria_Alphaproteobacteria_Rickettsiales_Rickettsiaceae_Rickettsia_Candidatus Rickettsia longicornii		PVIL-merged-M01780:105:000000000-CWNB3:1:1118:19003:16304	MK239931.1	100	402	0	0	1	402	257	658	0	743	Bacteria_Proteobacteria_Alphaproteobacteria_Rickettsiales_Anaplasmataceae_Anaplasma_Anaplasma phagocytophilum
NWSE-merged-M01780:105:000000000-CWNB3:1:2116:15808:16618	MT535574.1	98.507	402	6	0	1	402	257	658	0	710	Bacteria_Proteobacteria_Alphaproteobacteria_Rickettsiales_Rickettsiaceae_Rickettsia_Candidatus Rickettsia longicornii		PVIL-merged-M01780:105:000000000-CWNB3:1:1118:27058:18283	MK239931.1	100	402	0	0	1	402	257	658	0	743	Bacteria_Proteobacteria_Alphaproteobacteria_Rickettsiales_Anaplasmataceae_Anaplasma_Anaplasma phagocytophilum
NWSE-merged-M01780:105:000000000-CWNB3:1:2108:15911:7399	MT535574.1	98.756	402	5	0	1	402	257	658	0	715	Bacteria_Proteobacteria_Alphaproteobacteria_Rickettsiales_Rickettsiaceae_Rickettsia_Candidatus Rickettsia longicornii		PVIL-merged-M01780:105:000000000-CWNB3:1:1118:15139:21149	MK239931.1	100	402	0	0	1	402	257	658	0	743	Bacteria_Proteobacteria_Alphaproteobacteria_Rickettsiales_Anaplasmataceae_Anaplasma_Anaplasma phagocytophilum
NWSE-merged-M01780:105:000000000-CWNB3:1:2110:21146:4160	MT535574.1	98.756	402	5	0	1	402	257	658	0	715	Bacteria_Proteobacteria_Alphaproteobacteria_Rickettsiales_Rickettsiaceae_Rickettsia_Candidatus Rickettsia longicornii		PVIL-merged-M01780:105:000000000-CWNB3:1:1119:15400:22381	MK239931.1	100	402	0	0	1	402	257	658	0	743	Bacteria_Proteobacteria_Alphaproteobacteria_Rickettsiales_Anaplasmataceae_Anaplasma_Anaplasma phagocytophilum
NWSE-merged-M01780:105:000000000-CWNB3:1:2110:12033:15772	MT535574.1	96.269	402	15	0	1	402	257	658	0	660	Bacteria_Proteobacteria_Alphaproteobacteria_Rickettsiales_Rickettsiaceae_Rickettsia_Candidatus Rickettsia longicornii		PVIL-merged-M01780:105:000000000-CWNB3:1:2108:13378:12552	MK239931.1	99.751	402	1	0	1	402	257	658	0	737	Bacteria_Proteobacteria_Alphaproteobacteria_Rickettsiales_Anaplasmataceae_Anaplasma_Anaplasma phagocytophilum
NWSE-merged-M01780:105:000000000-CWNB3:1:1111:8451:23955	MT535574.1	98.259	402	7	0	1	402	257	658	0	704	Bacteria_Proteobacteria_Alphaproteobacteria_Rickettsiales_Rickettsiaceae_Rickettsia_Candidatus Rickettsia longicornii		PVIL-merged-M01780:105:000000000-CWNB3:1:2109:5723:8941	MK239931.1	100	402	0	0	1	402	257	658	0	743	Bacteria_Proteobacteria_Alphaproteobacteria_Rickettsiales_Anaplasmataceae_Anaplasma_Anaplasma phagocytophilum
NWSE-merged-M01780:105:000000000-CWNB3:1:1116:11055:12460	MT535574.1	99.02	408	4	0	1	408	257	664	0	732	Bacteria_Proteobacteria_Alphaproteobacteria_Rickettsiales_Rickettsiaceae_Rickettsia_Candidatus Rickettsia longicornii		PVIL-merged-M01780:105:000000000-CWNB3:1:2109:24398:17628	MK239931.1	100	402	0	0	1	402	257	658	0	743	Bacteria_Proteobacteria_Alphaproteobacteria_Rickettsiales_Anaplasmataceae_Anaplasma_Anaplasma phagocytophilum
NWSE-merged-M01780:105:000000000-CWNB3:1:2102:19271:23924	MT535574.1	99.005	402	4	0	1	402	257	658	0	721	Bacteria_Proteobacteria_Alphaproteobacteria_Rickettsiales_Rickettsiaceae_Rickettsia_Candidatus Rickettsia longicornii		PVIL-merged-M01780:105:000000000-CWNB3:1:2110:10703:20999	MK239931.1	97.512	402	10	0	1	402	257	658	0	688	Bacteria_Proteobacteria_Alphaproteobacteria_Rickettsiales_Anaplasmataceae_Anaplasma_Anaplasma phagocytophilum
NWSE-merged-M01780:105:000000000-CWNB3:1:2107:21234:6812	MT535574.1	97.264	402	11	0	1	402	257	658	0	682	Bacteria_Proteobacteria_Alphaproteobacteria_Rickettsiales_Rickettsiaceae_Rickettsia_Candidatus Rickettsia longicornii		PVIL-merged-M01780:105:000000000-CWNB3:1:2115:13323:10254	MK239931.1	100	402	0	0	1	402	257	658	0	743	Bacteria_Proteobacteria_Alphaproteobacteria_Rickettsiales_Anaplasmataceae_Anaplasma_Anaplasma phagocytophilum
NWSE-merged-M01780:105:000000000-CWNB3:1:2108:28494:15716	MT535574.1	98.756	402	5	0	1	402	257	658	0	715	Bacteria_Proteobacteria_Alphaproteobacteria_Rickettsiales_Rickettsiaceae_Rickettsia_Candidatus Rickettsia longicornii		PVIL-merged-M01780:105:000000000-CWNB3:1:2116:14185:16713	MN227385.1	96.766	402	13	0	1	402	64	465	0	671	Bacteria_Proteobacteria_Alphaproteobacteria_Rickettsiales_Anaplasmataceae_Anaplasma_Anaplasma phagocytophilum
NWSE-merged-M01780:105:000000000-CWNB3:1:1104:16687:10084	MT535574.1	99.751	402	1	0	1	402	257	658	0	737	Bacteria_Proteobacteria_Alphaproteobacteria_Rickettsiales_Rickettsiaceae_Rickettsia_Candidatus Rickettsia longicornii		PVIL-merged-M01780:105:000000000-CWNB3:1:2117:8849:4625	MK239931.1	100	402	0	0	1	402	257	658	0	743	Bacteria_Proteobacteria_Alphaproteobacteria_Rickettsiales_Anaplasmataceae_Anaplasma_Anaplasma phagocytophilum
NWSE-merged-M01780:105:000000000-CWNB3:1:1102:23799:21536	MT535574.1	99.254	402	3	0	1	402	257	658	0	726	Bacteria_Proteobacteria_Alphaproteobacteria_Rickettsiales_Rickettsiaceae_Rickettsia_Candidatus Rickettsia longicornii		PVIL-merged-M01780:105:000000000-CWNB3:1:2119:18749:12179	MK239931.1	100	402	0	0	1	402	257	658	0	743	Bacteria_Proteobacteria_Alphaproteobacteria_Rickettsiales_Anaplasmataceae_Anaplasma_Anaplasma phagocytophilum
NWSE-merged-M01780:105:000000000-CWNB3:1:1108:13909:11909	MT535574.1	95.343	408	19	0	1	408	257	664	0	649	Bacteria_Proteobacteria_Alphaproteobacteria_Rickettsiales_Rickettsiaceae_Rickettsia_Candidatus Rickettsia longicornii		PVIL-merged-M01780:105:000000000-CWNB3:1:1101:22580:18734	MK239931.1	100	402	0	0	1	402	257	658	0	743	Bacteria_Proteobacteria_Alphaproteobacteria_Rickettsiales_Anaplasmataceae_Anaplasma_Anaplasma phagocytophilum
NWSE-merged-M01780:105:000000000-CWNB3:1:2117:16902:17983	MT535574.1	99.502	402	2	0	1	402	257	658	0	732	Bacteria_Proteobacteria_Alphaproteobacteria_Rickettsiales_Rickettsiaceae_Rickettsia_Candidatus Rickettsia longicornii		PVIL-merged-M01780:105:000000000-CWNB3:1:1107:25257:7664	MK239931.1	100	402	0	0	1	402	257	658	0	743	Bacteria_Proteobacteria_Alphaproteobacteria_Rickettsiales_Anaplasmataceae_Anaplasma_Anaplasma phagocytophilum
NWSE-merged-M01780:105:000000000-CWNB3:1:2118:19720:17551	MT535574.1	99.254	402	3	0	1	402	257	658	0	726	Bacteria_Proteobacteria_Alphaproteobacteria_Rickettsiales_Rickettsiaceae_Rickettsia_Candidatus Rickettsia longicornii		PVIL-merged-M01780:105:000000000-CWNB3:1:1107:11342:11353	MK239931.1	99.005	402	4	0	1	402	257	658	0	721	Bacteria_Proteobacteria_Alphaproteobacteria_Rickettsiales_Anaplasmataceae_Anaplasma_Anaplasma phagocytophilum
NWSE-merged-M01780:105:000000000-CWNB3:1:1101:19862:14781	MT535574.1	99.254	402	3	0	1	402	257	658	0	726	Bacteria_Proteobacteria_Alphaproteobacteria_Rickettsiales_Rickettsiaceae_Rickettsia_Candidatus Rickettsia longicornii		PVIL-merged-M01780:105:000000000-CWNB3:1:1111:2944:15912	MK239931.1	100	402	0	0	1	402	257	658	0	743	Bacteria_Proteobacteria_Alphaproteobacteria_Rickettsiales_Anaplasmataceae_Anaplasma_Anaplasma phagocytophilum
NWSE-merged-M01780:105:000000000-CWNB3:1:1105:7031:15952	MT535574.1	96.766	402	13	0	1	402	257	658	0	671	Bacteria_Proteobacteria_Alphaproteobacteria_Rickettsiales_Rickettsiaceae_Rickettsia_Candidatus Rickettsia longicornii		PVIL-merged-M01780:105:000000000-CWNB3:1:1112:14499:18364	MK239931.1	99.757	411	1	0	1	411	257	667	0	754	Bacteria_Proteobacteria_Alphaproteobacteria_Rickettsiales_Anaplasmataceae_Anaplasma_Anaplasma phagocytophilum
NWSE-merged-M01780:105:000000000-CWNB3:1:1105:25839:16287	MT535574.1	99.005	402	4	0	1	402	257	658	0	721	Bacteria_Proteobacteria_Alphaproteobacteria_Rickettsiales_Rickettsiaceae_Rickettsia_Candidatus Rickettsia longicornii		PVIL-merged-M01780:105:000000000-CWNB3:1:1112:6950:22423	MK239931.1	99.751	402	1	0	1	402	257	658	0	737	Bacteria_Proteobacteria_Alphaproteobacteria_Rickettsiales_Anaplasmataceae_Anaplasma_Anaplasma phagocytophilum
NWSE-merged-M01780:105:000000000-CWNB3:1:1104:10150:16514	MT535574.1	99.502	402	2	0	1	402	257	658	0	732	Bacteria_Proteobacteria_Alphaproteobacteria_Rickettsiales_Rickettsiaceae_Rickettsia_Candidatus Rickettsia longicornii		PVIL-merged-M01780:105:000000000-CWNB3:1:1114:6410:14927	MK239931.1	100	402	0	0	1	402	257	658	0	743	Bacteria_Proteobacteria_Alphaproteobacteria_Rickettsiales_Anaplasmataceae_Anaplasma_Anaplasma phagocytophilum
NWSE-merged-M01780:105:000000000-CWNB3:1:1109:26642:20165	MT535574.1	99.005	402	4	0	1	402	257	658	0	721	Bacteria_Proteobacteria_Alphaproteobacteria_Rickettsiales_Rickettsiaceae_Rickettsia_Candidatus Rickettsia longicornii		PVIL-merged-M01780:105:000000000-CWNB3:1:1116:23056:5621	MK239931.1	99.751	402	1	0	1	402	257	658	0	737	Bacteria_Proteobacteria_Alphaproteobacteria_Rickettsiales_Anaplasmataceae_Anaplasma_Anaplasma phagocytophilum
NWSE-merged-M01780:105:000000000-CWNB3:1:1112:22443:6847	MT535574.1	97.761	402	9	0	1	402	257	658	0	693	Bacteria_Proteobacteria_Alphaproteobacteria_Rickettsiales_Rickettsiaceae_Rickettsia_Candidatus Rickettsia longicornii		PVIL-merged-M01780:105:000000000-CWNB3:1:1118:19268:10590	MK239931.1	99.005	402	4	0	1	402	257	658	0	721	Bacteria_Proteobacteria_Alphaproteobacteria_Rickettsiales_Anaplasmataceae_Anaplasma_Anaplasma phagocytophilum
NWSE-merged-M01780:105:000000000-CWNB3:1:1114:8623:6203	MT535574.1	97.761	402	9	0	1	402	257	658	0	693	Bacteria_Proteobacteria_Alphaproteobacteria_Rickettsiales_Rickettsiaceae_Rickettsia_Candidatus Rickettsia longicornii		PVIL-merged-M01780:105:000000000-CWNB3:1:1117:9807:12450	MK239931.1	99.751	402	1	0	1	402	257	658	0	737	Bacteria_Proteobacteria_Alphaproteobacteria_Rickettsiales_Anaplasmataceae_Anaplasma_Anaplasma phagocytophilum
NWSE-merged-M01780:105:000000000-CWNB3:1:1114:17834:21962	MT535574.1	97.264	402	11	0	1	402	257	658	0	682	Bacteria_Proteobacteria_Alphaproteobacteria_Rickettsiales_Rickettsiaceae_Rickettsia_Candidatus Rickettsia longicornii		PVIL-merged-M01780:105:000000000-CWNB3:1:1119:14479:17458	MN227385.1	97.264	402	11	0	1	402	64	465	0	682	Bacteria_Proteobacteria_Alphaproteobacteria_Rickettsiales_Anaplasmataceae_Anaplasma_Anaplasma phagocytophilum
NWSE-merged-M01780:105:000000000-CWNB3:1:2103:26481:5049	MT535574.1	98.259	402	7	0	1	402	257	658	0	704	Bacteria_Proteobacteria_Alphaproteobacteria_Rickettsiales_Rickettsiaceae_Rickettsia_Candidatus Rickettsia longicornii		PVIL-merged-M01780:105:000000000-CWNB3:1:2101:19221:14905	MK239931.1	98.259	402	7	0	1	402	257	658	0	704	Bacteria_Proteobacteria_Alphaproteobacteria_Rickettsiales_Anaplasmataceae_Anaplasma_Anaplasma phagocytophilum
NWSE-merged-M01780:105:000000000-CWNB3:1:2103:9330:7006	MT535574.1	95.285	403	19	0	1	403	257	659	2.26e-179	640	Bacteria_Proteobacteria_Alphaproteobacteria_Rickettsiales_Rickettsiaceae_Rickettsia_Candidatus Rickettsia longicornii		PVIL-merged-M01780:105:000000000-CWNB3:1:2107:5962:17293	MK239931.1	100	402	0	0	1	402	257	658	0	743	Bacteria_Proteobacteria_Alphaproteobacteria_Rickettsiales_Anaplasmataceae_Anaplasma_Anaplasma phagocytophilum
NWSE-merged-M01780:105:000000000-CWNB3:1:2112:3007:15281	MT535574.1	97.015	402	12	0	1	402	257	658	0	676	Bacteria_Proteobacteria_Alphaproteobacteria_Rickettsiales_Rickettsiaceae_Rickettsia_Candidatus Rickettsia longicornii		PVIL-merged-M01780:105:000000000-CWNB3:1:2108:25603:21369	MK239931.1	100	402	0	0	1	402	257	658	0	743	Bacteria_Proteobacteria_Alphaproteobacteria_Rickettsiales_Anaplasmataceae_Anaplasma_Anaplasma phagocytophilum
NWSE-merged-M01780:105:000000000-CWNB3:1:2118:21421:7874	MT535574.1	98.259	402	7	0	1	402	257	658	0	704	Bacteria_Proteobacteria_Alphaproteobacteria_Rickettsiales_Rickettsiaceae_Rickettsia_Candidatus Rickettsia longicornii		PVIL-merged-M01780:105:000000000-CWNB3:1:2113:10292:13620	MK239931.1	100	402	0	0	1	402	257	658	0	743	Bacteria_Proteobacteria_Alphaproteobacteria_Rickettsiales_Anaplasmataceae_Anaplasma_Anaplasma phagocytophilum
NWSE-merged-M01780:105:000000000-CWNB3:1:1105:19173:3185	MT535574.1	98.259	402	7	0	1	402	257	658	0	704	Bacteria_Proteobacteria_Alphaproteobacteria_Rickettsiales_Rickettsiaceae_Rickettsia_Candidatus Rickettsia longicornii		PVIL-merged-M01780:105:000000000-CWNB3:1:2111:9315:8814	MK239931.1	100	402	0	0	1	402	257	658	0	743	Bacteria_Proteobacteria_Alphaproteobacteria_Rickettsiales_Anaplasmataceae_Anaplasma_Anaplasma phagocytophilum
NWSE-merged-M01780:105:000000000-CWNB3:1:1106:16634:21812	MT535574.1	98.259	402	7	0	1	402	257	658	0	704	Bacteria_Proteobacteria_Alphaproteobacteria_Rickettsiales_Rickettsiaceae_Rickettsia_Candidatus Rickettsia longicornii		PVIL-merged-M01780:105:000000000-CWNB3:1:2115:2857:11707	MK239931.1	100	402	0	0	1	402	257	658	0	743	Bacteria_Proteobacteria_Alphaproteobacteria_Rickettsiales_Anaplasmataceae_Anaplasma_Anaplasma phagocytophilum
NWSE-merged-M01780:105:000000000-CWNB3:1:1104:18813:6483	MT535574.1	98.507	402	6	0	1	402	257	658	0	710	Bacteria_Proteobacteria_Alphaproteobacteria_Rickettsiales_Rickettsiaceae_Rickettsia_Candidatus Rickettsia longicornii		PVIL-merged-M01780:105:000000000-CWNB3:1:2114:5954:18428	MK239931.1	98.068	414	8	0	1	414	257	670	0	721	Bacteria_Proteobacteria_Alphaproteobacteria_Rickettsiales_Anaplasmataceae_Anaplasma_Anaplasma phagocytophilum
NWSE-merged-M01780:105:000000000-CWNB3:1:2106:25913:4686	MT535574.1	98.756	402	5	0	1	402	257	658	0	715	Bacteria_Proteobacteria_Alphaproteobacteria_Rickettsiales_Rickettsiaceae_Rickettsia_Candidatus Rickettsia longicornii		PVIL-merged-M01780:105:000000000-CWNB3:1:2116:15173:11809	AY969012.1	96.02	402	16	0	1	402	311	712	0	654	Bacteria_Proteobacteria_Alphaproteobacteria_Rickettsiales_Anaplasmataceae_Anaplasma_Anaplasma phagocytophilum
NWSE-merged-M01780:105:000000000-CWNB3:1:2107:20745:19159	MT535574.1	95.98	398	16	0	1	398	257	654	0	647	Bacteria_Proteobacteria_Alphaproteobacteria_Rickettsiales_Rickettsiaceae_Rickettsia_Candidatus Rickettsia longicornii		PVIL-merged-M01780:105:000000000-CWNB3:1:2116:19152:12082	MK239931.1	100	402	0	0	1	402	257	658	0	743	Bacteria_Proteobacteria_Alphaproteobacteria_Rickettsiales_Anaplasmataceae_Anaplasma_Anaplasma phagocytophilum
NWSE-merged-M01780:105:000000000-CWNB3:1:2116:19833:18788	MT535574.1	96.594	411	14	0	1	411	257	667	0	682	Bacteria_Proteobacteria_Alphaproteobacteria_Rickettsiales_Rickettsiaceae_Rickettsia_Candidatus Rickettsia longicornii		PVIL-merged-M01780:105:000000000-CWNB3:1:1102:15997:4049	MK239931.1	100	402	0	0	1	402	257	658	0	743	Bacteria_Proteobacteria_Alphaproteobacteria_Rickettsiales_Anaplasmataceae_Anaplasma_Anaplasma phagocytophilum
NWSE-merged-M01780:105:000000000-CWNB3:1:1102:5203:18435	MT535574.1	98.756	402	5	0	1	402	257	658	0	715	Bacteria_Proteobacteria_Alphaproteobacteria_Rickettsiales_Rickettsiaceae_Rickettsia_Candidatus Rickettsia longicornii		PVIL-merged-M01780:105:000000000-CWNB3:1:1106:12101:16879	MK239931.1	100	402	0	0	1	402	257	658	0	743	Bacteria_Proteobacteria_Alphaproteobacteria_Rickettsiales_Anaplasmataceae_Anaplasma_Anaplasma phagocytophilum
NWSE-merged-M01780:105:000000000-CWNB3:1:1111:10884:18051	MT535574.1	96.517	402	14	0	1	402	257	658	0	665	Bacteria_Proteobacteria_Alphaproteobacteria_Rickettsiales_Rickettsiaceae_Rickettsia_Candidatus Rickettsia longicornii		PVIL-merged-M01780:105:000000000-CWNB3:1:1108:4733:19555	MK239931.1	95.599	409	18	0	1	409	257	665	0	656	Bacteria_Proteobacteria_Alphaproteobacteria_Rickettsiales_Anaplasmataceae_Anaplasma_Anaplasma phagocytophilum
NWSE-merged-M01780:105:000000000-CWNB3:1:1111:21652:16075	MT535574.1	96.222	397	15	0	1	397	257	653	0	651	Bacteria_Proteobacteria_Alphaproteobacteria_Rickettsiales_Rickettsiaceae_Rickettsia_Candidatus Rickettsia longicornii		PVIL-merged-M01780:105:000000000-CWNB3:1:1108:17438:7917	MK239931.1	100	402	0	0	1	402	257	658	0	743	Bacteria_Proteobacteria_Alphaproteobacteria_Rickettsiales_Anaplasmataceae_Anaplasma_Anaplasma phagocytophilum
NWSE-merged-M01780:105:000000000-CWNB3:1:1112:24567:3169	MT535574.1	97.995	399	8	0	1	399	257	655	0	693	Bacteria_Proteobacteria_Alphaproteobacteria_Rickettsiales_Rickettsiaceae_Rickettsia_Candidatus Rickettsia longicornii		PVIL-merged-M01780:105:000000000-CWNB3:1:1105:21968:22543	MK239931.1	99.254	402	3	0	1	402	257	658	0	726	Bacteria_Proteobacteria_Alphaproteobacteria_Rickettsiales_Anaplasmataceae_Anaplasma_Anaplasma phagocytophilum
NWSE-merged-M01780:105:000000000-CWNB3:1:1112:21438:15114	MT535574.1	99.005	402	4	0	1	402	257	658	0	721	Bacteria_Proteobacteria_Alphaproteobacteria_Rickettsiales_Rickettsiaceae_Rickettsia_Candidatus Rickettsia longicornii		PVIL-merged-M01780:105:000000000-CWNB3:1:1115:12513:6189	MK239931.1	100	402	0	0	1	402	257	658	0	743	Bacteria_Proteobacteria_Alphaproteobacteria_Rickettsiales_Anaplasmataceae_Anaplasma_Anaplasma phagocytophilum
NWSE-merged-M01780:105:000000000-CWNB3:1:1114:20247:3916	MT535574.1	97.512	402	10	0	1	402	257	658	0	688	Bacteria_Proteobacteria_Alphaproteobacteria_Rickettsiales_Rickettsiaceae_Rickettsia_Candidatus Rickettsia longicornii		PVIL-merged-M01780:105:000000000-CWNB3:1:1119:3702:15260	MK239931.1	100	402	0	0	1	402	257	658	0	743	Bacteria_Proteobacteria_Alphaproteobacteria_Rickettsiales_Anaplasmataceae_Anaplasma_Anaplasma phagocytophilum
NWSE-merged-M01780:105:000000000-CWNB3:1:2107:15806:19842	MT535574.1	97.264	402	11	0	1	402	257	658	0	682	Bacteria_Proteobacteria_Alphaproteobacteria_Rickettsiales_Rickettsiaceae_Rickettsia_Candidatus Rickettsia longicornii		PVIL-merged-M01780:105:000000000-CWNB3:1:2101:19236:9597	AY969012.1	96.269	402	15	0	1	402	311	712	0	660	Bacteria_Proteobacteria_Alphaproteobacteria_Rickettsiales_Anaplasmataceae_Anaplasma_Anaplasma phagocytophilum
NWSE-merged-M01780:105:000000000-CWNB3:1:2113:23076:12451	MT535574.1	97.761	402	9	0	1	402	257	658	0	693	Bacteria_Proteobacteria_Alphaproteobacteria_Rickettsiales_Rickettsiaceae_Rickettsia_Candidatus Rickettsia longicornii		PVIL-merged-M01780:105:000000000-CWNB3:1:2102:22199:17945	MK239931.1	100	402	0	0	1	402	257	658	0	743	Bacteria_Proteobacteria_Alphaproteobacteria_Rickettsiales_Anaplasmataceae_Anaplasma_Anaplasma phagocytophilum
NWSE-merged-M01780:105:000000000-CWNB3:1:1103:20596:17598	MT535574.1	99.005	402	4	0	1	402	257	658	0	721	Bacteria_Proteobacteria_Alphaproteobacteria_Rickettsiales_Rickettsiaceae_Rickettsia_Candidatus Rickettsia longicornii		PVIL-merged-M01780:105:000000000-CWNB3:1:2104:15789:3044	MK239931.1	99.254	402	3	0	1	402	257	658	0	726	Bacteria_Proteobacteria_Alphaproteobacteria_Rickettsiales_Anaplasmataceae_Anaplasma_Anaplasma phagocytophilum
NWSE-merged-M01780:105:000000000-CWNB3:1:1106:22415:4287	MT535574.1	97.015	402	12	0	1	402	257	658	0	676	Bacteria_Proteobacteria_Alphaproteobacteria_Rickettsiales_Rickettsiaceae_Rickettsia_Candidatus Rickettsia longicornii		PVIL-merged-M01780:105:000000000-CWNB3:1:2102:21370:4556	MK239931.1	97.761	402	9	0	1	402	257	658	0	693	Bacteria_Proteobacteria_Alphaproteobacteria_Rickettsiales_Anaplasmataceae_Anaplasma_Anaplasma phagocytophilum
NWSE-merged-M01780:105:000000000-CWNB3:1:1107:22254:6995	MT535574.1	96.774	403	13	0	1	403	257	659	0	673	Bacteria_Proteobacteria_Alphaproteobacteria_Rickettsiales_Rickettsiaceae_Rickettsia_Candidatus Rickettsia longicornii		PVIL-merged-M01780:105:000000000-CWNB3:1:2106:28679:11730	MK239931.1	100	402	0	0	1	402	257	658	0	743	Bacteria_Proteobacteria_Alphaproteobacteria_Rickettsiales_Anaplasmataceae_Anaplasma_Anaplasma phagocytophilum
NWSE-merged-M01780:105:000000000-CWNB3:1:1108:4886:13985	MT535574.1	95.771	402	17	0	1	402	257	658	0	649	Bacteria_Proteobacteria_Alphaproteobacteria_Rickettsiales_Rickettsiaceae_Rickettsia_Candidatus Rickettsia longicornii		PVIL-merged-M01780:105:000000000-CWNB3:1:2107:2954:15357	MK239931.1	99.502	402	2	0	1	402	257	658	0	732	Bacteria_Proteobacteria_Alphaproteobacteria_Rickettsiales_Anaplasmataceae_Anaplasma_Anaplasma phagocytophilum
NWSE-merged-M01780:105:000000000-CWNB3:1:1109:6994:16039	MT535574.1	98.756	402	5	0	1	402	257	658	0	715	Bacteria_Proteobacteria_Alphaproteobacteria_Rickettsiales_Rickettsiaceae_Rickettsia_Candidatus Rickettsia longicornii		PVIL-merged-M01780:105:000000000-CWNB3:1:2106:20024:14689	MK239931.1	100	402	0	0	1	402	257	658	0	743	Bacteria_Proteobacteria_Alphaproteobacteria_Rickettsiales_Anaplasmataceae_Anaplasma_Anaplasma phagocytophilum
NWSE-merged-M01780:105:000000000-CWNB3:1:1114:14400:6950	MT535574.1	96.585	410	14	0	1	410	257	666	0	680	Bacteria_Proteobacteria_Alphaproteobacteria_Rickettsiales_Rickettsiaceae_Rickettsia_Candidatus Rickettsia longicornii		PVIL-merged-M01780:105:000000000-CWNB3:1:2108:21834:12329	MK239931.1	100	402	0	0	1	402	257	658	0	743	Bacteria_Proteobacteria_Alphaproteobacteria_Rickettsiales_Anaplasmataceae_Anaplasma_Anaplasma phagocytophilum
NWSE-merged-M01780:105:000000000-CWNB3:1:2110:23882:22717	MT535574.1	98.259	402	7	0	1	402	257	658	0	704	Bacteria_Proteobacteria_Alphaproteobacteria_Rickettsiales_Rickettsiaceae_Rickettsia_Candidatus Rickettsia longicornii		PVIL-merged-M01780:105:000000000-CWNB3:1:2108:15671:20024	MK239931.1	99.005	402	4	0	1	402	257	658	0	721	Bacteria_Proteobacteria_Alphaproteobacteria_Rickettsiales_Anaplasmataceae_Anaplasma_Anaplasma phagocytophilum
NWSE-merged-M01780:105:000000000-CWNB3:1:1112:12122:17355	MT535574.1	97.277	404	7	4	1	402	257	658	0	682	Bacteria_Proteobacteria_Alphaproteobacteria_Rickettsiales_Rickettsiaceae_Rickettsia_Candidatus Rickettsia longicornii		PVIL-merged-M01780:105:000000000-CWNB3:1:2110:17255:4827	MK239931.1	100	402	0	0	1	402	257	658	0	743	Bacteria_Proteobacteria_Alphaproteobacteria_Rickettsiales_Anaplasmataceae_Anaplasma_Anaplasma phagocytophilum
NWSE-merged-M01780:105:000000000-CWNB3:1:2105:18548:8973	MT535574.1	98.507	402	6	0	1	402	257	658	0	710	Bacteria_Proteobacteria_Alphaproteobacteria_Rickettsiales_Rickettsiaceae_Rickettsia_Candidatus Rickettsia longicornii		PVIL-merged-M01780:105:000000000-CWNB3:1:2116:28763:8215	MK239931.1	99.502	402	2	0	1	402	257	658	0	732	Bacteria_Proteobacteria_Alphaproteobacteria_Rickettsiales_Anaplasmataceae_Anaplasma_Anaplasma phagocytophilum
NWSE-merged-M01780:105:000000000-CWNB3:1:2108:22222:19317	MT535574.1	99.005	402	4	0	1	402	257	658	0	721	Bacteria_Proteobacteria_Alphaproteobacteria_Rickettsiales_Rickettsiaceae_Rickettsia_Candidatus Rickettsia longicornii		PVIL-merged-M01780:105:000000000-CWNB3:1:2118:10252:5634	MK239931.1	99.263	407	3	0	1	407	252	658	0	736	Bacteria_Proteobacteria_Alphaproteobacteria_Rickettsiales_Anaplasmataceae_Anaplasma_Anaplasma phagocytophilum
NWSE-merged-M01780:105:000000000-CWNB3:1:2117:13900:7118	MT535574.1	97.512	402	10	0	1	402	257	658	0	688	Bacteria_Proteobacteria_Alphaproteobacteria_Rickettsiales_Rickettsiaceae_Rickettsia_Candidatus Rickettsia longicornii		PVIL-merged-M01780:105:000000000-CWNB3:1:2118:26607:18580	MK239931.1	99.502	402	2	0	1	402	257	658	0	732	Bacteria_Proteobacteria_Alphaproteobacteria_Rickettsiales_Anaplasmataceae_Anaplasma_Anaplasma phagocytophilum
NWSE-merged-M01780:105:000000000-CWNB3:1:1101:7198:12898	MT535574.1	99.005	402	4	0	1	402	257	658	0	721	Bacteria_Proteobacteria_Alphaproteobacteria_Rickettsiales_Rickettsiaceae_Rickettsia_Candidatus Rickettsia longicornii		PVIL-merged-M01780:105:000000000-CWNB3:1:2118:23837:23957	MK239931.1	99.254	402	3	0	1	402	257	658	0	726	Bacteria_Proteobacteria_Alphaproteobacteria_Rickettsiales_Anaplasmataceae_Anaplasma_Anaplasma phagocytophilum
NWSE-merged-M01780:105:000000000-CWNB3:1:1108:26082:19866	MT535574.1	99.502	402	2	0	1	402	257	658	0	732	Bacteria_Proteobacteria_Alphaproteobacteria_Rickettsiales_Rickettsiaceae_Rickettsia_Candidatus Rickettsia longicornii		PVIL-merged-M01780:105:000000000-CWNB3:1:1106:18011:15687	MK239931.1	100	402	0	0	1	402	257	658	0	743	Bacteria_Proteobacteria_Alphaproteobacteria_Rickettsiales_Anaplasmataceae_Anaplasma_Anaplasma phagocytophilum
NWSE-merged-M01780:105:000000000-CWNB3:1:2101:21155:10744	MT535574.1	99.254	402	3	0	1	402	257	658	0	726	Bacteria_Proteobacteria_Alphaproteobacteria_Rickettsiales_Rickettsiaceae_Rickettsia_Candidatus Rickettsia longicornii		PVIL-merged-M01780:105:000000000-CWNB3:1:1109:15908:4594	MK239931.1	99.502	402	2	0	1	402	257	658	0	732	Bacteria_Proteobacteria_Alphaproteobacteria_Rickettsiales_Anaplasmataceae_Anaplasma_Anaplasma phagocytophilum
NWSE-merged-M01780:105:000000000-CWNB3:1:2116:16734:22285	MT535574.1	98.01	402	8	0	1	402	257	658	0	699	Bacteria_Proteobacteria_Alphaproteobacteria_Rickettsiales_Rickettsiaceae_Rickettsia_Candidatus Rickettsia longicornii		PVIL-merged-M01780:105:000000000-CWNB3:1:1111:20564:6429	MK239931.1	99.751	402	1	0	1	402	257	658	0	737	Bacteria_Proteobacteria_Alphaproteobacteria_Rickettsiales_Anaplasmataceae_Anaplasma_Anaplasma phagocytophilum
NWSE-merged-M01780:105:000000000-CWNB3:1:2115:27095:15587	MT535574.1	98.259	402	7	0	1	402	257	658	0	704	Bacteria_Proteobacteria_Alphaproteobacteria_Rickettsiales_Rickettsiaceae_Rickettsia_Candidatus Rickettsia longicornii		PVIL-merged-M01780:105:000000000-CWNB3:1:1110:16596:6435	MK239931.1	100	402	0	0	1	402	257	658	0	743	Bacteria_Proteobacteria_Alphaproteobacteria_Rickettsiales_Anaplasmataceae_Anaplasma_Anaplasma phagocytophilum
NWSE-merged-M01780:105:000000000-CWNB3:1:2115:10363:16690	MT535574.1	97.015	402	12	0	1	402	257	658	0	676	Bacteria_Proteobacteria_Alphaproteobacteria_Rickettsiales_Rickettsiaceae_Rickettsia_Candidatus Rickettsia longicornii		PVIL-merged-M01780:105:000000000-CWNB3:1:1112:17930:6322	MK239931.1	100	402	0	0	1	402	257	658	0	743	Bacteria_Proteobacteria_Alphaproteobacteria_Rickettsiales_Anaplasmataceae_Anaplasma_Anaplasma phagocytophilum
NWSE-merged-M01780:105:000000000-CWNB3:1:1101:21003:1941	MT535574.1	98.259	402	7	0	1	402	257	658	0	704	Bacteria_Proteobacteria_Alphaproteobacteria_Rickettsiales_Rickettsiaceae_Rickettsia_Candidatus Rickettsia longicornii		PVIL-merged-M01780:105:000000000-CWNB3:1:1116:23603:11328	MK239931.1	99.751	402	1	0	1	402	257	658	0	737	Bacteria_Proteobacteria_Alphaproteobacteria_Rickettsiales_Anaplasmataceae_Anaplasma_Anaplasma phagocytophilum
NWSE-merged-M01780:105:000000000-CWNB3:1:1105:18536:13837	MT535574.1	99.254	402	3	0	1	402	257	658	0	726	Bacteria_Proteobacteria_Alphaproteobacteria_Rickettsiales_Rickettsiaceae_Rickettsia_Candidatus Rickettsia longicornii		PVIL-merged-M01780:105:000000000-CWNB3:1:1115:14436:22556	MK239931.1	99.254	402	3	0	1	402	257	658	0	726	Bacteria_Proteobacteria_Alphaproteobacteria_Rickettsiales_Anaplasmataceae_Anaplasma_Anaplasma phagocytophilum
NWSE-merged-M01780:105:000000000-CWNB3:1:2107:26398:16928	MT535574.1	99.005	402	4	0	1	402	257	658	0	721	Bacteria_Proteobacteria_Alphaproteobacteria_Rickettsiales_Rickettsiaceae_Rickettsia_Candidatus Rickettsia longicornii		PVIL-merged-M01780:105:000000000-CWNB3:1:1118:16444:4100	AY969012.1	94.802	404	17	3	1	402	311	712	1.75e-175	627	Bacteria_Proteobacteria_Alphaproteobacteria_Rickettsiales_Anaplasmataceae_Anaplasma_Anaplasma phagocytophilum
NWSE-merged-M01780:105:000000000-CWNB3:1:2118:14410:6669	MT535574.1	97.015	402	12	0	1	402	257	658	0	676	Bacteria_Proteobacteria_Alphaproteobacteria_Rickettsiales_Rickettsiaceae_Rickettsia_Candidatus Rickettsia longicornii		PVIL-merged-M01780:105:000000000-CWNB3:1:1117:21584:13825	MK239931.1	100	402	0	0	1	402	257	658	0	743	Bacteria_Proteobacteria_Alphaproteobacteria_Rickettsiales_Anaplasmataceae_Anaplasma_Anaplasma phagocytophilum
NWSE-merged-M01780:105:000000000-CWNB3:1:1101:24059:4968	MT535574.1	97.761	402	9	0	1	402	257	658	0	693	Bacteria_Proteobacteria_Alphaproteobacteria_Rickettsiales_Rickettsiaceae_Rickettsia_Candidatus Rickettsia longicornii		PVIL-merged-M01780:105:000000000-CWNB3:1:2101:12511:13705	MK239931.1	100	402	0	0	1	402	257	658	0	743	Bacteria_Proteobacteria_Alphaproteobacteria_Rickettsiales_Anaplasmataceae_Anaplasma_Anaplasma phagocytophilum
NWSE-merged-M01780:105:000000000-CWNB3:1:1102:27489:15743	MT535574.1	99.254	402	3	0	1	402	257	658	0	726	Bacteria_Proteobacteria_Alphaproteobacteria_Rickettsiales_Rickettsiaceae_Rickettsia_Candidatus Rickettsia longicornii		PVIL-merged-M01780:105:000000000-CWNB3:1:2101:17960:24554	MK239931.1	99.751	402	1	0	1	402	257	658	0	737	Bacteria_Proteobacteria_Alphaproteobacteria_Rickettsiales_Anaplasmataceae_Anaplasma_Anaplasma phagocytophilum
NWSE-merged-M01780:105:000000000-CWNB3:1:1108:7833:13534	MT535574.1	99.751	402	1	0	1	402	257	658	0	737	Bacteria_Proteobacteria_Alphaproteobacteria_Rickettsiales_Rickettsiaceae_Rickettsia_Candidatus Rickettsia longicornii		PVIL-merged-M01780:105:000000000-CWNB3:1:2107:13610:5889	MK239931.1	99.502	402	2	0	1	402	257	658	0	732	Bacteria_Proteobacteria_Alphaproteobacteria_Rickettsiales_Anaplasmataceae_Anaplasma_Anaplasma phagocytophilum
NWSE-merged-M01780:105:000000000-CWNB3:1:1111:16653:17189	MT535574.1	97.831	415	9	0	1	415	257	671	0	717	Bacteria_Proteobacteria_Alphaproteobacteria_Rickettsiales_Rickettsiaceae_Rickettsia_Candidatus Rickettsia longicornii		PVIL-merged-M01780:105:000000000-CWNB3:1:2109:14218:9588	MK239931.1	99.502	402	2	0	1	402	257	658	0	732	Bacteria_Proteobacteria_Alphaproteobacteria_Rickettsiales_Anaplasmataceae_Anaplasma_Anaplasma phagocytophilum
NWSE-merged-M01780:105:000000000-CWNB3:1:1119:22592:23793	MT535574.1	92.611	406	30	0	1	406	257	662	1.08e-162	584	Bacteria_Proteobacteria_Alphaproteobacteria_Rickettsiales_Rickettsiaceae_Rickettsia_Candidatus Rickettsia longicornii		PVIL-merged-M01780:105:000000000-CWNB3:1:2117:20682:7025	MK239931.1	100	402	0	0	1	402	257	658	0	743	Bacteria_Proteobacteria_Alphaproteobacteria_Rickettsiales_Anaplasmataceae_Anaplasma_Anaplasma phagocytophilum
NWSE-merged-M01780:105:000000000-CWNB3:1:2110:16841:9986	MT535574.1	99.005	402	4	0	1	402	257	658	0	721	Bacteria_Proteobacteria_Alphaproteobacteria_Rickettsiales_Rickettsiaceae_Rickettsia_Candidatus Rickettsia longicornii		PVIL-merged-M01780:105:000000000-CWNB3:1:1109:8581:11498	MK239931.1	100	402	0	0	1	402	257	658	0	743	Bacteria_Proteobacteria_Alphaproteobacteria_Rickettsiales_Anaplasmataceae_Anaplasma_Anaplasma phagocytophilum
NWSE-merged-M01780:105:000000000-CWNB3:1:2112:14611:15992	MT535574.1	96.766	402	13	0	1	402	257	658	0	671	Bacteria_Proteobacteria_Alphaproteobacteria_Rickettsiales_Rickettsiaceae_Rickettsia_Candidatus Rickettsia longicornii		PVIL-merged-M01780:105:000000000-CWNB3:1:1109:21556:2974	MK239931.1	100	402	0	0	1	402	257	658	0	743	Bacteria_Proteobacteria_Alphaproteobacteria_Rickettsiales_Anaplasmataceae_Anaplasma_Anaplasma phagocytophilum
NWSE-merged-M01780:105:000000000-CWNB3:1:1101:24263:16910	MT535574.1	99.005	402	4	0	1	402	257	658	0	721	Bacteria_Proteobacteria_Alphaproteobacteria_Rickettsiales_Rickettsiaceae_Rickettsia_Candidatus Rickettsia longicornii		PVIL-merged-M01780:105:000000000-CWNB3:1:1108:17211:4668	MK239931.1	100	402	0	0	1	402	257	658	0	743	Bacteria_Proteobacteria_Alphaproteobacteria_Rickettsiales_Anaplasmataceae_Anaplasma_Anaplasma phagocytophilum
NWSE-merged-M01780:105:000000000-CWNB3:1:2107:7014:19182	MT535574.1	97.264	402	11	0	1	402	257	658	0	682	Bacteria_Proteobacteria_Alphaproteobacteria_Rickettsiales_Rickettsiaceae_Rickettsia_Candidatus Rickettsia longicornii		PVIL-merged-M01780:105:000000000-CWNB3:1:1113:26008:9005	MK239931.1	100	402	0	0	1	402	257	658	0	743	Bacteria_Proteobacteria_Alphaproteobacteria_Rickettsiales_Anaplasmataceae_Anaplasma_Anaplasma phagocytophilum
NWSE-merged-M01780:105:000000000-CWNB3:1:2110:20844:9410	MT535574.1	95.522	402	18	0	1	402	257	658	1.74e-180	643	Bacteria_Proteobacteria_Alphaproteobacteria_Rickettsiales_Rickettsiaceae_Rickettsia_Candidatus Rickettsia longicornii		PVIL-merged-M01780:105:000000000-CWNB3:1:1115:5796:15649	MK239931.1	100	402	0	0	1	402	257	658	0	743	Bacteria_Proteobacteria_Alphaproteobacteria_Rickettsiales_Anaplasmataceae_Anaplasma_Anaplasma phagocytophilum
NWSE-merged-M01780:105:000000000-CWNB3:1:2111:22868:20047	MT535574.1	99.254	402	3	0	1	402	257	658	0	726	Bacteria_Proteobacteria_Alphaproteobacteria_Rickettsiales_Rickettsiaceae_Rickettsia_Candidatus Rickettsia longicornii		PVIL-merged-M01780:105:000000000-CWNB3:1:1113:27072:15511	MK239931.1	96.766	402	13	0	1	402	257	658	0	671	Bacteria_Proteobacteria_Alphaproteobacteria_Rickettsiales_Anaplasmataceae_Anaplasma_Anaplasma phagocytophilum
NWSE-merged-M01780:105:000000000-CWNB3:1:2116:24304:10034	MT535574.1	98.756	402	5	0	1	402	257	658	0	715	Bacteria_Proteobacteria_Alphaproteobacteria_Rickettsiales_Rickettsiaceae_Rickettsia_Candidatus Rickettsia longicornii		PVIL-merged-M01780:105:000000000-CWNB3:1:1114:7178:22541	MK239931.1	100	402	0	0	1	402	257	658	0	743	Bacteria_Proteobacteria_Alphaproteobacteria_Rickettsiales_Anaplasmataceae_Anaplasma_Anaplasma phagocytophilum
NWSE-merged-M01780:105:000000000-CWNB3:1:1102:13466:19285	MT535574.1	97.015	402	12	0	1	402	257	658	0	676	Bacteria_Proteobacteria_Alphaproteobacteria_Rickettsiales_Rickettsiaceae_Rickettsia_Candidatus Rickettsia longicornii		PVIL-merged-M01780:105:000000000-CWNB3:1:1117:16479:19865	MK239931.1	99.502	402	2	0	1	402	257	658	0	732	Bacteria_Proteobacteria_Alphaproteobacteria_Rickettsiales_Anaplasmataceae_Anaplasma_Anaplasma phagocytophilum
NWSE-merged-M01780:105:000000000-CWNB3:1:1111:7599:4283	MT535574.1	94.373	391	20	2	1	390	257	646	3.85e-167	599	Bacteria_Proteobacteria_Alphaproteobacteria_Rickettsiales_Rickettsiaceae_Rickettsia_Candidatus Rickettsia longicornii		PVIL-merged-M01780:105:000000000-CWNB3:1:1118:23661:4104	MK239931.1	98.756	402	5	0	1	402	257	658	0	717	Bacteria_Proteobacteria_Alphaproteobacteria_Rickettsiales_Anaplasmataceae_Anaplasma_Anaplasma phagocytophilum
NWSE-merged-M01780:105:000000000-CWNB3:1:2101:2782:14492	MT535574.1	98.507	402	6	0	1	402	257	658	0	710	Bacteria_Proteobacteria_Alphaproteobacteria_Rickettsiales_Rickettsiaceae_Rickettsia_Candidatus Rickettsia longicornii		PVIL-merged-M01780:105:000000000-CWNB3:1:1118:11673:19750	MK239931.1	100	402	0	0	1	402	257	658	0	743	Bacteria_Proteobacteria_Alphaproteobacteria_Rickettsiales_Anaplasmataceae_Anaplasma_Anaplasma phagocytophilum
NWSE-merged-M01780:105:000000000-CWNB3:1:1116:15899:2285	MT535574.1	96.535	404	14	0	1	404	257	660	0	669	Bacteria_Proteobacteria_Alphaproteobacteria_Rickettsiales_Rickettsiaceae_Rickettsia_Candidatus Rickettsia longicornii		PVIL-merged-M01780:105:000000000-CWNB3:1:2103:23205:10725	MK239931.1	100	402	0	0	1	402	257	658	0	743	Bacteria_Proteobacteria_Alphaproteobacteria_Rickettsiales_Anaplasmataceae_Anaplasma_Anaplasma phagocytophilum
NWSE-merged-M01780:105:000000000-CWNB3:1:1119:28640:18049	MT535574.1	98.507	402	6	0	1	402	257	658	0	710	Bacteria_Proteobacteria_Alphaproteobacteria_Rickettsiales_Rickettsiaceae_Rickettsia_Candidatus Rickettsia longicornii		PVIL-merged-M01780:105:000000000-CWNB3:1:2104:21217:13879	AY969012.1	96.02	402	16	0	1	402	311	712	0	654	Bacteria_Proteobacteria_Alphaproteobacteria_Rickettsiales_Anaplasmataceae_Anaplasma_Anaplasma phagocytophilum
NWSE-merged-M01780:105:000000000-CWNB3:1:2114:21837:16548	MT535574.1	98.507	402	6	0	1	402	257	658	0	710	Bacteria_Proteobacteria_Alphaproteobacteria_Rickettsiales_Rickettsiaceae_Rickettsia_Candidatus Rickettsia longicornii		PVIL-merged-M01780:105:000000000-CWNB3:1:2107:9032:6327	MK239931.1	100	402	0	0	1	402	257	658	0	743	Bacteria_Proteobacteria_Alphaproteobacteria_Rickettsiales_Anaplasmataceae_Anaplasma_Anaplasma phagocytophilum
NWSE-merged-M01780:105:000000000-CWNB3:1:1101:9947:12263	MT535574.1	98.02	404	8	0	1	404	257	660	0	702	Bacteria_Proteobacteria_Alphaproteobacteria_Rickettsiales_Rickettsiaceae_Rickettsia_Candidatus Rickettsia longicornii		PVIL-merged-M01780:105:000000000-CWNB3:1:2106:16587:17659	MK239931.1	100	402	0	0	1	402	257	658	0	743	Bacteria_Proteobacteria_Alphaproteobacteria_Rickettsiales_Anaplasmataceae_Anaplasma_Anaplasma phagocytophilum
NWSE-merged-M01780:105:000000000-CWNB3:1:1106:3167:15426	MT535574.1	99.751	402	1	0	1	402	257	658	0	737	Bacteria_Proteobacteria_Alphaproteobacteria_Rickettsiales_Rickettsiaceae_Rickettsia_Candidatus Rickettsia longicornii		PVIL-merged-M01780:105:000000000-CWNB3:1:2106:23126:14698	MK239931.1	99.751	402	1	0	1	402	257	658	0	737	Bacteria_Proteobacteria_Alphaproteobacteria_Rickettsiales_Anaplasmataceae_Anaplasma_Anaplasma phagocytophilum
NWSE-merged-M01780:105:000000000-CWNB3:1:1113:23478:19058	MT535574.1	99.751	402	1	0	1	402	257	658	0	737	Bacteria_Proteobacteria_Alphaproteobacteria_Rickettsiales_Rickettsiaceae_Rickettsia_Candidatus Rickettsia longicornii		PVIL-merged-M01780:105:000000000-CWNB3:1:2110:7958:21368	MK239931.1	99.751	402	1	0	1	402	257	658	0	737	Bacteria_Proteobacteria_Alphaproteobacteria_Rickettsiales_Anaplasmataceae_Anaplasma_Anaplasma phagocytophilum
NWSE-merged-M01780:105:000000000-CWNB3:1:1115:19185:23761	MT535574.1	99.502	402	2	0	1	402	257	658	0	732	Bacteria_Proteobacteria_Alphaproteobacteria_Rickettsiales_Rickettsiaceae_Rickettsia_Candidatus Rickettsia longicornii		PVIL-merged-M01780:105:000000000-CWNB3:1:2108:16552:17764	MK239931.1	100	402	0	0	1	402	257	658	0	743	Bacteria_Proteobacteria_Alphaproteobacteria_Rickettsiales_Anaplasmataceae_Anaplasma_Anaplasma phagocytophilum
NWSE-merged-M01780:105:000000000-CWNB3:1:1115:28374:7643	MT535574.1	98.259	402	7	0	1	402	257	658	0	704	Bacteria_Proteobacteria_Alphaproteobacteria_Rickettsiales_Rickettsiaceae_Rickettsia_Candidatus Rickettsia longicornii		PVIL-merged-M01780:105:000000000-CWNB3:1:2110:17312:14823	MK239931.1	100	402	0	0	1	402	257	658	0	743	Bacteria_Proteobacteria_Alphaproteobacteria_Rickettsiales_Anaplasmataceae_Anaplasma_Anaplasma phagocytophilum
NWSE-merged-M01780:105:000000000-CWNB3:1:2103:21217:22905	MT535574.1	94.802	404	21	0	1	404	257	660	1.42e-176	630	Bacteria_Proteobacteria_Alphaproteobacteria_Rickettsiales_Rickettsiaceae_Rickettsia_Candidatus Rickettsia longicornii		PVIL-merged-M01780:105:000000000-CWNB3:1:2115:14545:20035	MK239931.1	100	402	0	0	1	402	257	658	0	743	Bacteria_Proteobacteria_Alphaproteobacteria_Rickettsiales_Anaplasmataceae_Anaplasma_Anaplasma phagocytophilum
NWSE-merged-M01780:105:000000000-CWNB3:1:2117:16920:23167	MT535574.1	98.511	403	4	2	1	402	257	658	0	710	Bacteria_Proteobacteria_Alphaproteobacteria_Rickettsiales_Rickettsiaceae_Rickettsia_Candidatus Rickettsia longicornii		PVIL-merged-M01780:105:000000000-CWNB3:1:2116:17277:23472	MK239931.1	100	402	0	0	1	402	257	658	0	743	Bacteria_Proteobacteria_Alphaproteobacteria_Rickettsiales_Anaplasmataceae_Anaplasma_Anaplasma phagocytophilum
NWSE-merged-M01780:105:000000000-CWNB3:1:2112:19944:16007	MT535574.1	97.512	402	10	0	1	402	257	658	0	688	Bacteria_Proteobacteria_Alphaproteobacteria_Rickettsiales_Rickettsiaceae_Rickettsia_Candidatus Rickettsia longicornii		PVIL-merged-M01780:105:000000000-CWNB3:1:1104:9486:11660	MK239931.1	99.751	402	1	0	1	402	257	658	0	737	Bacteria_Proteobacteria_Alphaproteobacteria_Rickettsiales_Anaplasmataceae_Anaplasma_Anaplasma phagocytophilum
NWSE-merged-M01780:105:000000000-CWNB3:1:1110:24081:19561	MT535574.1	98.259	402	7	0	1	402	257	658	0	704	Bacteria_Proteobacteria_Alphaproteobacteria_Rickettsiales_Rickettsiaceae_Rickettsia_Candidatus Rickettsia longicornii		PVIL-merged-M01780:105:000000000-CWNB3:1:1104:16773:8805	MK239931.1	100	402	0	0	1	402	257	658	0	743	Bacteria_Proteobacteria_Alphaproteobacteria_Rickettsiales_Anaplasmataceae_Anaplasma_Anaplasma phagocytophilum
NWSE-merged-M01780:105:000000000-CWNB3:1:1114:25448:8524	MT535574.1	96.269	402	15	0	1	402	257	658	0	660	Bacteria_Proteobacteria_Alphaproteobacteria_Rickettsiales_Rickettsiaceae_Rickettsia_Candidatus Rickettsia longicornii		PVIL-merged-M01780:105:000000000-CWNB3:1:1105:3667:11003	MK239931.1	99.502	402	2	0	1	402	257	658	0	732	Bacteria_Proteobacteria_Alphaproteobacteria_Rickettsiales_Anaplasmataceae_Anaplasma_Anaplasma phagocytophilum
NWSE-merged-M01780:105:000000000-CWNB3:1:2114:15589:10864	MT535574.1	98.297	411	7	0	1	411	257	667	0	721	Bacteria_Proteobacteria_Alphaproteobacteria_Rickettsiales_Rickettsiaceae_Rickettsia_Candidatus Rickettsia longicornii		PVIL-merged-M01780:105:000000000-CWNB3:1:1111:17259:4297	MK239931.1	100	402	0	0	1	402	257	658	0	743	Bacteria_Proteobacteria_Alphaproteobacteria_Rickettsiales_Anaplasmataceae_Anaplasma_Anaplasma phagocytophilum
NWSE-merged-M01780:105:000000000-CWNB3:1:1101:22355:21082	MT535574.1	97.761	402	9	0	1	402	257	658	0	693	Bacteria_Proteobacteria_Alphaproteobacteria_Rickettsiales_Rickettsiaceae_Rickettsia_Candidatus Rickettsia longicornii		PVIL-merged-M01780:105:000000000-CWNB3:1:1110:14726:23401	MK239931.1	100	402	0	0	1	402	257	658	0	743	Bacteria_Proteobacteria_Alphaproteobacteria_Rickettsiales_Anaplasmataceae_Anaplasma_Anaplasma phagocytophilum
NWSE-merged-M01780:105:000000000-CWNB3:1:1112:16453:7794	MT535574.1	94.39	410	23	0	1	410	257	666	1.39e-176	630	Bacteria_Proteobacteria_Alphaproteobacteria_Rickettsiales_Rickettsiaceae_Rickettsia_Candidatus Rickettsia longicornii		PVIL-merged-M01780:105:000000000-CWNB3:1:1115:23808:13599	MK239931.1	100	402	0	0	1	402	257	658	0	743	Bacteria_Proteobacteria_Alphaproteobacteria_Rickettsiales_Anaplasmataceae_Anaplasma_Anaplasma phagocytophilum
NWSE-merged-M01780:105:000000000-CWNB3:1:2103:21265:12156	MT535574.1	98.756	402	5	0	1	402	257	658	0	715	Bacteria_Proteobacteria_Alphaproteobacteria_Rickettsiales_Rickettsiaceae_Rickettsia_Candidatus Rickettsia longicornii		PVIL-merged-M01780:105:000000000-CWNB3:1:1115:26049:21870	MK239931.1	99.751	402	1	0	1	402	257	658	0	737	Bacteria_Proteobacteria_Alphaproteobacteria_Rickettsiales_Anaplasmataceae_Anaplasma_Anaplasma phagocytophilum
NWSE-merged-M01780:105:000000000-CWNB3:1:1105:19397:18099	MT535574.1	97.519	403	10	0	1	403	257	659	0	689	Bacteria_Proteobacteria_Alphaproteobacteria_Rickettsiales_Rickettsiaceae_Rickettsia_Candidatus Rickettsia longicornii		PVIL-merged-M01780:105:000000000-CWNB3:1:1118:11521:12319	MK239931.1	100	402	0	0	1	402	257	658	0	743	Bacteria_Proteobacteria_Alphaproteobacteria_Rickettsiales_Anaplasmataceae_Anaplasma_Anaplasma phagocytophilum
NWSE-merged-M01780:105:000000000-CWNB3:1:1106:20756:24620	MT535574.1	98.01	402	8	0	1	402	257	658	0	699	Bacteria_Proteobacteria_Alphaproteobacteria_Rickettsiales_Rickettsiaceae_Rickettsia_Candidatus Rickettsia longicornii		PVIL-merged-M01780:105:000000000-CWNB3:1:1119:20427:1869	MK239931.1	99.254	402	3	0	1	402	257	658	0	726	Bacteria_Proteobacteria_Alphaproteobacteria_Rickettsiales_Anaplasmataceae_Anaplasma_Anaplasma phagocytophilum
NWSE-merged-M01780:105:000000000-CWNB3:1:1104:26219:19390	MT535574.1	98.259	402	7	0	1	402	257	658	0	704	Bacteria_Proteobacteria_Alphaproteobacteria_Rickettsiales_Rickettsiaceae_Rickettsia_Candidatus Rickettsia longicornii		PVIL-merged-M01780:105:000000000-CWNB3:1:2107:26732:6328	MK239931.1	97.015	402	12	0	1	402	257	658	0	676	Bacteria_Proteobacteria_Alphaproteobacteria_Rickettsiales_Anaplasmataceae_Anaplasma_Anaplasma phagocytophilum
NWSE-merged-M01780:105:000000000-CWNB3:1:1109:27008:16398	MT535574.1	98.03	406	8	0	1	406	257	662	0	706	Bacteria_Proteobacteria_Alphaproteobacteria_Rickettsiales_Rickettsiaceae_Rickettsia_Candidatus Rickettsia longicornii		PVIL-merged-M01780:105:000000000-CWNB3:1:2116:11578:9440	MK239931.1	99.254	402	3	0	1	402	257	658	0	726	Bacteria_Proteobacteria_Alphaproteobacteria_Rickettsiales_Anaplasmataceae_Anaplasma_Anaplasma phagocytophilum
NWSE-merged-M01780:105:000000000-CWNB3:1:1111:23701:17767	MT535574.1	99.751	402	1	0	1	402	257	658	0	737	Bacteria_Proteobacteria_Alphaproteobacteria_Rickettsiales_Rickettsiaceae_Rickettsia_Candidatus Rickettsia longicornii		PVIL-merged-M01780:105:000000000-CWNB3:1:2115:13963:9622	MK239931.1	99.751	402	1	0	1	402	257	658	0	737	Bacteria_Proteobacteria_Alphaproteobacteria_Rickettsiales_Anaplasmataceae_Anaplasma_Anaplasma phagocytophilum
NWSE-merged-M01780:105:000000000-CWNB3:1:1101:22400:12933	MT535574.1	99.751	402	1	0	1	402	257	658	0	737	Bacteria_Proteobacteria_Alphaproteobacteria_Rickettsiales_Rickettsiaceae_Rickettsia_Candidatus Rickettsia longicornii		PVIL-merged-M01780:105:000000000-CWNB3:1:2116:16405:15447	MK239931.1	100	402	0	0	1	402	257	658	0	743	Bacteria_Proteobacteria_Alphaproteobacteria_Rickettsiales_Anaplasmataceae_Anaplasma_Anaplasma phagocytophilum
NWSE-merged-M01780:105:000000000-CWNB3:1:1105:16948:21911	MT535574.1	99.502	402	2	0	1	402	257	658	0	732	Bacteria_Proteobacteria_Alphaproteobacteria_Rickettsiales_Rickettsiaceae_Rickettsia_Candidatus Rickettsia longicornii		PVIL-merged-M01780:105:000000000-CWNB3:1:2119:25164:20536	MK239931.1	99.254	402	3	0	1	402	257	658	0	726	Bacteria_Proteobacteria_Alphaproteobacteria_Rickettsiales_Anaplasmataceae_Anaplasma_Anaplasma phagocytophilum
NWSE-merged-M01780:105:000000000-CWNB3:1:1114:16121:6550	MT535574.1	97.512	402	10	0	1	402	257	658	0	688	Bacteria_Proteobacteria_Alphaproteobacteria_Rickettsiales_Rickettsiaceae_Rickettsia_Candidatus Rickettsia longicornii		PVIL-merged-M01780:105:000000000-CWNB3:1:1102:21751:12605	MK239931.1	100	402	0	0	1	402	257	658	0	743	Bacteria_Proteobacteria_Alphaproteobacteria_Rickettsiales_Anaplasmataceae_Anaplasma_Anaplasma phagocytophilum
NWSE-merged-M01780:105:000000000-CWNB3:1:1117:11444:22728	MT535574.1	99.254	402	3	0	1	402	257	658	0	728	Bacteria_Proteobacteria_Alphaproteobacteria_Rickettsiales_Rickettsiaceae_Rickettsia_Candidatus Rickettsia longicornii		PVIL-merged-M01780:105:000000000-CWNB3:1:1104:17953:8719	MN227385.1	96.766	402	13	0	1	402	64	465	0	671	Bacteria_Proteobacteria_Alphaproteobacteria_Rickettsiales_Anaplasmataceae_Anaplasma_Anaplasma phagocytophilum
NWSE-merged-M01780:105:000000000-CWNB3:1:1117:12105:6281	MT535574.1	98.756	402	5	0	1	402	257	658	0	715	Bacteria_Proteobacteria_Alphaproteobacteria_Rickettsiales_Rickettsiaceae_Rickettsia_Candidatus Rickettsia longicornii		PVIL-merged-M01780:105:000000000-CWNB3:1:1103:13136:2745	MK239931.1	98.756	402	5	0	1	402	257	658	0	715	Bacteria_Proteobacteria_Alphaproteobacteria_Rickettsiales_Anaplasmataceae_Anaplasma_Anaplasma phagocytophilum
NWSE-merged-M01780:105:000000000-CWNB3:1:2109:24343:12864	MT535574.1	99.254	402	3	0	1	402	257	658	0	726	Bacteria_Proteobacteria_Alphaproteobacteria_Rickettsiales_Rickettsiaceae_Rickettsia_Candidatus Rickettsia longicornii		PVIL-merged-M01780:105:000000000-CWNB3:1:1101:19738:3568	MK239931.1	99.502	402	2	0	1	402	257	658	0	732	Bacteria_Proteobacteria_Alphaproteobacteria_Rickettsiales_Anaplasmataceae_Anaplasma_Anaplasma phagocytophilum
NWSE-merged-M01780:105:000000000-CWNB3:1:2119:18087:8774	MT535574.1	96.02	402	16	0	1	402	257	658	0	654	Bacteria_Proteobacteria_Alphaproteobacteria_Rickettsiales_Rickettsiaceae_Rickettsia_Candidatus Rickettsia longicornii		PVIL-merged-M01780:105:000000000-CWNB3:1:1106:12247:10286	MK239931.1	97.761	402	9	0	1	402	257	658	0	693	Bacteria_Proteobacteria_Alphaproteobacteria_Rickettsiales_Anaplasmataceae_Anaplasma_Anaplasma phagocytophilum
NWSE-merged-M01780:105:000000000-CWNB3:1:1114:4008:10103	MT535574.1	97.99	398	8	0	2	399	258	655	0	691	Bacteria_Proteobacteria_Alphaproteobacteria_Rickettsiales_Rickettsiaceae_Rickettsia_Candidatus Rickettsia longicornii		PVIL-merged-M01780:105:000000000-CWNB3:1:1107:17880:4400	MK239931.1	100	402	0	0	1	402	257	658	0	743	Bacteria_Proteobacteria_Alphaproteobacteria_Rickettsiales_Anaplasmataceae_Anaplasma_Anaplasma phagocytophilum
NWSE-merged-M01780:105:000000000-CWNB3:1:1117:22494:4604	MT535574.1	99.502	402	2	0	1	402	257	658	0	732	Bacteria_Proteobacteria_Alphaproteobacteria_Rickettsiales_Rickettsiaceae_Rickettsia_Candidatus Rickettsia longicornii		PVIL-merged-M01780:105:000000000-CWNB3:1:1108:15258:12146	MK239931.1	100	402	0	0	1	402	257	658	0	743	Bacteria_Proteobacteria_Alphaproteobacteria_Rickettsiales_Anaplasmataceae_Anaplasma_Anaplasma phagocytophilum
NWSE-merged-M01780:105:000000000-CWNB3:1:2110:24504:20177	MT535574.1	98.507	402	6	0	1	402	257	658	0	710	Bacteria_Proteobacteria_Alphaproteobacteria_Rickettsiales_Rickettsiaceae_Rickettsia_Candidatus Rickettsia longicornii		PVIL-merged-M01780:105:000000000-CWNB3:1:1107:15225:9961	AY969015.1	99.002	401	4	0	1	401	311	711	0	719	Bacteria_Proteobacteria_Alphaproteobacteria_Rickettsiales_Anaplasmataceae_Anaplasma_Anaplasma phagocytophilum
NWSE-merged-M01780:105:000000000-CWNB3:1:1101:22274:12175	MT535574.1	99.751	402	1	0	1	402	257	658	0	737	Bacteria_Proteobacteria_Alphaproteobacteria_Rickettsiales_Rickettsiaceae_Rickettsia_Candidatus Rickettsia longicornii		PVIL-merged-M01780:105:000000000-CWNB3:1:1106:19659:18945	MK239931.1	100	402	0	0	1	402	257	658	0	743	Bacteria_Proteobacteria_Alphaproteobacteria_Rickettsiales_Anaplasmataceae_Anaplasma_Anaplasma phagocytophilum
NWSE-merged-M01780:105:000000000-CWNB3:1:1111:4219:17115	MT535574.1	99.005	402	4	0	1	402	257	658	0	721	Bacteria_Proteobacteria_Alphaproteobacteria_Rickettsiales_Rickettsiaceae_Rickettsia_Candidatus Rickettsia longicornii		PVIL-merged-M01780:105:000000000-CWNB3:1:1115:25122:13835	MK239931.1	99.751	402	1	0	1	402	257	658	0	737	Bacteria_Proteobacteria_Alphaproteobacteria_Rickettsiales_Anaplasmataceae_Anaplasma_Anaplasma phagocytophilum
NWSE-merged-M01780:105:000000000-CWNB3:1:1115:26579:9180	MT535574.1	98.511	403	6	0	1	403	257	659	0	712	Bacteria_Proteobacteria_Alphaproteobacteria_Rickettsiales_Rickettsiaceae_Rickettsia_Candidatus Rickettsia longicornii		PVIL-merged-M01780:105:000000000-CWNB3:1:1117:19974:22651	MK239931.1	99.751	402	1	0	1	402	257	658	0	737	Bacteria_Proteobacteria_Alphaproteobacteria_Rickettsiales_Anaplasmataceae_Anaplasma_Anaplasma phagocytophilum
NWSE-merged-M01780:105:000000000-CWNB3:1:2107:12548:20290	MT535574.1	99.005	402	4	0	1	402	257	658	0	721	Bacteria_Proteobacteria_Alphaproteobacteria_Rickettsiales_Rickettsiaceae_Rickettsia_Candidatus Rickettsia longicornii		PVIL-merged-M01780:105:000000000-CWNB3:1:2101:20949:3681	MK239931.1	100	402	0	0	1	402	257	658	0	743	Bacteria_Proteobacteria_Alphaproteobacteria_Rickettsiales_Anaplasmataceae_Anaplasma_Anaplasma phagocytophilum
NWSE-merged-M01780:105:000000000-CWNB3:1:2109:23836:16722	MT535574.1	99.254	402	3	0	1	402	257	658	0	726	Bacteria_Proteobacteria_Alphaproteobacteria_Rickettsiales_Rickettsiaceae_Rickettsia_Candidatus Rickettsia longicornii		PVIL-merged-M01780:105:000000000-CWNB3:1:2103:25688:11572	MK239931.1	100	402	0	0	1	402	257	658	0	743	Bacteria_Proteobacteria_Alphaproteobacteria_Rickettsiales_Anaplasmataceae_Anaplasma_Anaplasma phagocytophilum
NWSE-merged-M01780:105:000000000-CWNB3:1:2114:20866:24699	MT535574.1	98.507	402	6	0	1	402	257	658	0	710	Bacteria_Proteobacteria_Alphaproteobacteria_Rickettsiales_Rickettsiaceae_Rickettsia_Candidatus Rickettsia longicornii		PVIL-merged-M01780:105:000000000-CWNB3:1:2103:13345:6834	MK239931.1	100	402	0	0	1	402	257	658	0	743	Bacteria_Proteobacteria_Alphaproteobacteria_Rickettsiales_Anaplasmataceae_Anaplasma_Anaplasma phagocytophilum
NWSE-merged-M01780:105:000000000-CWNB3:1:2116:24857:18524	MT535574.1	98.507	402	6	0	1	402	257	658	0	710	Bacteria_Proteobacteria_Alphaproteobacteria_Rickettsiales_Rickettsiaceae_Rickettsia_Candidatus Rickettsia longicornii		PVIL-merged-M01780:105:000000000-CWNB3:1:2108:24275:14924	MK239931.1	100	402	0	0	1	402	257	658	0	743	Bacteria_Proteobacteria_Alphaproteobacteria_Rickettsiales_Anaplasmataceae_Anaplasma_Anaplasma phagocytophilum
NWSE-merged-M01780:105:000000000-CWNB3:1:2116:18874:4272	MT535574.1	97.27	403	11	0	1	403	257	659	0	684	Bacteria_Proteobacteria_Alphaproteobacteria_Rickettsiales_Rickettsiaceae_Rickettsia_Candidatus Rickettsia longicornii		PVIL-merged-M01780:105:000000000-CWNB3:1:2108:18261:15781	MK239931.1	98.507	402	6	0	1	402	257	658	0	710	Bacteria_Proteobacteria_Alphaproteobacteria_Rickettsiales_Anaplasmataceae_Anaplasma_Anaplasma phagocytophilum
NWSE-merged-M01780:105:000000000-CWNB3:1:1114:13458:21019	MT535574.1	98.756	402	5	0	1	402	257	658	0	715	Bacteria_Proteobacteria_Alphaproteobacteria_Rickettsiales_Rickettsiaceae_Rickettsia_Candidatus Rickettsia longicornii		PVIL-merged-M01780:105:000000000-CWNB3:1:2109:24190:13054	MK239931.1	99.751	402	1	0	1	402	257	658	0	737	Bacteria_Proteobacteria_Alphaproteobacteria_Rickettsiales_Anaplasmataceae_Anaplasma_Anaplasma phagocytophilum
NWSE-merged-M01780:105:000000000-CWNB3:1:1115:12063:24272	MT535574.1	95.771	402	17	0	1	402	257	658	0	649	Bacteria_Proteobacteria_Alphaproteobacteria_Rickettsiales_Rickettsiaceae_Rickettsia_Candidatus Rickettsia longicornii		PVIL-merged-M01780:105:000000000-CWNB3:1:2107:19220:20496	MK239931.1	100	402	0	0	1	402	257	658	0	743	Bacteria_Proteobacteria_Alphaproteobacteria_Rickettsiales_Anaplasmataceae_Anaplasma_Anaplasma phagocytophilum
NWSE-merged-M01780:105:000000000-CWNB3:1:2110:17765:6732	MT535574.1	96.02	402	16	0	1	402	257	658	0	654	Bacteria_Proteobacteria_Alphaproteobacteria_Rickettsiales_Rickettsiaceae_Rickettsia_Candidatus Rickettsia longicornii		PVIL-merged-M01780:105:000000000-CWNB3:1:2108:16205:22966	MK239931.1	99.751	402	1	0	1	402	257	658	0	737	Bacteria_Proteobacteria_Alphaproteobacteria_Rickettsiales_Anaplasmataceae_Anaplasma_Anaplasma phagocytophilum
NWSE-merged-M01780:105:000000000-CWNB3:1:1109:27469:19359	MT535574.1	98.259	402	7	0	1	402	257	658	0	704	Bacteria_Proteobacteria_Alphaproteobacteria_Rickettsiales_Rickettsiaceae_Rickettsia_Candidatus Rickettsia longicornii		PVIL-merged-M01780:105:000000000-CWNB3:1:2115:16923:13099	MK239931.1	100	402	0	0	1	402	257	658	0	743	Bacteria_Proteobacteria_Alphaproteobacteria_Rickettsiales_Anaplasmataceae_Anaplasma_Anaplasma phagocytophilum
NWSE-merged-M01780:105:000000000-CWNB3:1:1111:16969:13528	MT535574.1	99.502	402	2	0	1	402	257	658	0	732	Bacteria_Proteobacteria_Alphaproteobacteria_Rickettsiales_Rickettsiaceae_Rickettsia_Candidatus Rickettsia longicornii		PVIL-merged-M01780:105:000000000-CWNB3:1:1103:3854:10288	MK239931.1	98.01	402	8	0	1	402	257	658	0	699	Bacteria_Proteobacteria_Alphaproteobacteria_Rickettsiales_Anaplasmataceae_Anaplasma_Anaplasma phagocytophilum
NWSE-merged-M01780:105:000000000-CWNB3:1:1113:13514:15790	MT535574.1	97.015	402	12	0	1	402	257	658	0	676	Bacteria_Proteobacteria_Alphaproteobacteria_Rickettsiales_Rickettsiaceae_Rickettsia_Candidatus Rickettsia longicornii		PVIL-merged-M01780:105:000000000-CWNB3:1:1104:20430:8947	MN227385.1	97.264	402	11	0	1	402	64	465	0	682	Bacteria_Proteobacteria_Alphaproteobacteria_Rickettsiales_Anaplasmataceae_Anaplasma_Anaplasma phagocytophilum
NWSE-merged-M01780:105:000000000-CWNB3:1:1116:8119:12537	MT535574.1	99.005	402	4	0	1	402	257	658	0	721	Bacteria_Proteobacteria_Alphaproteobacteria_Rickettsiales_Rickettsiaceae_Rickettsia_Candidatus Rickettsia longicornii		PVIL-merged-M01780:105:000000000-CWNB3:1:1104:15292:6482	MK239931.1	100	402	0	0	1	402	257	658	0	743	Bacteria_Proteobacteria_Alphaproteobacteria_Rickettsiales_Anaplasmataceae_Anaplasma_Anaplasma phagocytophilum
NWSE-merged-M01780:105:000000000-CWNB3:1:1119:8568:14031	MT535574.1	98.259	402	7	0	1	402	257	658	0	704	Bacteria_Proteobacteria_Alphaproteobacteria_Rickettsiales_Rickettsiaceae_Rickettsia_Candidatus Rickettsia longicornii		PVIL-merged-M01780:105:000000000-CWNB3:1:1102:22626:4580	AY969012.1	95.771	402	17	0	1	402	311	712	0	649	Bacteria_Proteobacteria_Alphaproteobacteria_Rickettsiales_Anaplasmataceae_Anaplasma_Anaplasma phagocytophilum
NWSE-merged-M01780:105:000000000-CWNB3:1:1103:15628:7054	MT535574.1	90.215	419	33	8	1	415	257	671	2.47e-149	540	Bacteria_Proteobacteria_Alphaproteobacteria_Rickettsiales_Rickettsiaceae_Rickettsia_Candidatus Rickettsia longicornii		PVIL-merged-M01780:105:000000000-CWNB3:1:1107:5038:8068	AY969012.1	96.02	402	16	0	1	402	311	712	0	654	Bacteria_Proteobacteria_Alphaproteobacteria_Rickettsiales_Anaplasmataceae_Anaplasma_Anaplasma phagocytophilum
NWSE-merged-M01780:105:000000000-CWNB3:1:1106:23277:12445	MT535574.1	97.044	406	12	0	1	406	257	662	0	684	Bacteria_Proteobacteria_Alphaproteobacteria_Rickettsiales_Rickettsiaceae_Rickettsia_Candidatus Rickettsia longicornii		PVIL-merged-M01780:105:000000000-CWNB3:1:1107:15820:11116	MK239931.1	100	402	0	0	1	402	257	658	0	743	Bacteria_Proteobacteria_Alphaproteobacteria_Rickettsiales_Anaplasmataceae_Anaplasma_Anaplasma phagocytophilum
NWSE-merged-M01780:105:000000000-CWNB3:1:1109:8502:13802	MT535574.1	96.766	402	13	0	1	402	257	658	0	671	Bacteria_Proteobacteria_Alphaproteobacteria_Rickettsiales_Rickettsiaceae_Rickettsia_Candidatus Rickettsia longicornii		PVIL-merged-M01780:105:000000000-CWNB3:1:1109:9837:14742	MK239931.1	100	402	0	0	1	402	257	658	0	743	Bacteria_Proteobacteria_Alphaproteobacteria_Rickettsiales_Anaplasmataceae_Anaplasma_Anaplasma phagocytophilum
NWSE-merged-M01780:105:000000000-CWNB3:1:2116:23694:20288	MT535574.1	99.254	402	3	0	1	402	257	658	0	726	Bacteria_Proteobacteria_Alphaproteobacteria_Rickettsiales_Rickettsiaceae_Rickettsia_Candidatus Rickettsia longicornii		PVIL-merged-M01780:105:000000000-CWNB3:1:1110:13885:10525	MK239931.1	100	402	0	0	1	402	257	658	0	743	Bacteria_Proteobacteria_Alphaproteobacteria_Rickettsiales_Anaplasmataceae_Anaplasma_Anaplasma phagocytophilum
NWSE-merged-M01780:105:000000000-CWNB3:1:1105:22002:15556	MT535574.1	97.59	415	10	0	1	415	257	671	0	712	Bacteria_Proteobacteria_Alphaproteobacteria_Rickettsiales_Rickettsiaceae_Rickettsia_Candidatus Rickettsia longicornii		PVIL-merged-M01780:105:000000000-CWNB3:1:1113:14440:18999	MK239931.1	99.751	402	1	0	1	402	257	658	0	737	Bacteria_Proteobacteria_Alphaproteobacteria_Rickettsiales_Anaplasmataceae_Anaplasma_Anaplasma phagocytophilum
NWSE-merged-M01780:105:000000000-CWNB3:1:1106:8590:23406	MT535574.1	97.761	402	9	0	1	402	257	658	0	693	Bacteria_Proteobacteria_Alphaproteobacteria_Rickettsiales_Rickettsiaceae_Rickettsia_Candidatus Rickettsia longicornii		PVIL-merged-M01780:105:000000000-CWNB3:1:1112:19430:19875	MK239931.1	100	402	0	0	1	402	257	658	0	743	Bacteria_Proteobacteria_Alphaproteobacteria_Rickettsiales_Anaplasmataceae_Anaplasma_Anaplasma phagocytophilum
NWSE-merged-M01780:105:000000000-CWNB3:1:1116:23211:3097	MT535574.1	96.5	400	14	0	1	400	257	656	0	662	Bacteria_Proteobacteria_Alphaproteobacteria_Rickettsiales_Rickettsiaceae_Rickettsia_Candidatus Rickettsia longicornii		PVIL-merged-M01780:105:000000000-CWNB3:1:1114:28866:15311	MK239931.1	100	402	0	0	1	402	257	658	0	743	Bacteria_Proteobacteria_Alphaproteobacteria_Rickettsiales_Anaplasmataceae_Anaplasma_Anaplasma phagocytophilum
NWSE-merged-M01780:105:000000000-CWNB3:1:2110:11759:23863	MT535574.1	97.27	403	9	2	1	402	257	658	0	682	Bacteria_Proteobacteria_Alphaproteobacteria_Rickettsiales_Rickettsiaceae_Rickettsia_Candidatus Rickettsia longicornii		PVIL-merged-M01780:105:000000000-CWNB3:1:2108:10235:4486	MK239931.1	99.502	402	2	0	1	402	257	658	0	732	Bacteria_Proteobacteria_Alphaproteobacteria_Rickettsiales_Anaplasmataceae_Anaplasma_Anaplasma phagocytophilum
NWSE-merged-M01780:105:000000000-CWNB3:1:2116:26548:14366	MT535574.1	94.763	401	21	0	1	401	257	657	6.28e-175	625	Bacteria_Proteobacteria_Alphaproteobacteria_Rickettsiales_Rickettsiaceae_Rickettsia_Candidatus Rickettsia longicornii		PVIL-merged-M01780:105:000000000-CWNB3:1:2110:21786:16693	MK239931.1	100	406	0	0	2	407	253	658	0	750	Bacteria_Proteobacteria_Alphaproteobacteria_Rickettsiales_Anaplasmataceae_Anaplasma_Anaplasma phagocytophilum
NWSE-merged-M01780:105:000000000-CWNB3:1:1110:20577:9232	MT535574.1	99.755	408	1	0	1	408	251	658	0	749	Bacteria_Proteobacteria_Alphaproteobacteria_Rickettsiales_Rickettsiaceae_Rickettsia_Candidatus Rickettsia longicornii		PVIL-merged-M01780:105:000000000-CWNB3:1:2112:20248:24326	MK239931.1	99.751	402	1	0	1	402	257	658	0	737	Bacteria_Proteobacteria_Alphaproteobacteria_Rickettsiales_Anaplasmataceae_Anaplasma_Anaplasma phagocytophilum
NWSE-merged-M01780:105:000000000-CWNB3:1:2110:16585:4328	MT535574.1	98.01	402	8	0	1	402	257	658	0	699	Bacteria_Proteobacteria_Alphaproteobacteria_Rickettsiales_Rickettsiaceae_Rickettsia_Candidatus Rickettsia longicornii		PVIL-merged-M01780:105:000000000-CWNB3:1:2118:24189:5249	MK239931.1	100	402	0	0	1	402	257	658	0	743	Bacteria_Proteobacteria_Alphaproteobacteria_Rickettsiales_Anaplasmataceae_Anaplasma_Anaplasma phagocytophilum
NWSE-merged-M01780:105:000000000-CWNB3:1:2118:9990:3967	MT535574.1	98.259	402	7	0	1	402	257	658	0	704	Bacteria_Proteobacteria_Alphaproteobacteria_Rickettsiales_Rickettsiaceae_Rickettsia_Candidatus Rickettsia longicornii		PVIL-merged-M01780:105:000000000-CWNB3:1:2117:8037:22065	AY969012.1	95.522	402	18	0	1	402	311	712	1.74e-180	643	Bacteria_Proteobacteria_Alphaproteobacteria_Rickettsiales_Anaplasmataceae_Anaplasma_Anaplasma phagocytophilum
NWSE-merged-M01780:105:000000000-CWNB3:1:2118:23466:16136	MT535574.1	96.766	402	13	0	1	402	257	658	0	671	Bacteria_Proteobacteria_Alphaproteobacteria_Rickettsiales_Rickettsiaceae_Rickettsia_Candidatus Rickettsia longicornii		PVIL-merged-M01780:105:000000000-CWNB3:1:1103:25792:11709	MK239931.1	99.751	402	1	0	1	402	257	658	0	737	Bacteria_Proteobacteria_Alphaproteobacteria_Rickettsiales_Anaplasmataceae_Anaplasma_Anaplasma phagocytophilum
NWSE-merged-M01780:105:000000000-CWNB3:1:1109:17970:14618	MT535574.1	93.917	411	25	0	1	411	257	667	8.4e-174	621	Bacteria_Proteobacteria_Alphaproteobacteria_Rickettsiales_Rickettsiaceae_Rickettsia_Candidatus Rickettsia longicornii		PVIL-merged-M01780:105:000000000-CWNB3:1:1107:15669:8231	MK239931.1	100	402	0	0	1	402	257	658	0	743	Bacteria_Proteobacteria_Alphaproteobacteria_Rickettsiales_Anaplasmataceae_Anaplasma_Anaplasma phagocytophilum
NWSE-merged-M01780:105:000000000-CWNB3:1:1110:4707:13896	MT535574.1	99.005	402	4	0	1	402	257	658	0	721	Bacteria_Proteobacteria_Alphaproteobacteria_Rickettsiales_Rickettsiaceae_Rickettsia_Candidatus Rickettsia longicornii		PVIL-merged-M01780:105:000000000-CWNB3:1:1108:27942:19890	MK239931.1	99.751	402	1	0	1	402	257	658	0	737	Bacteria_Proteobacteria_Alphaproteobacteria_Rickettsiales_Anaplasmataceae_Anaplasma_Anaplasma phagocytophilum
NWSE-merged-M01780:105:000000000-CWNB3:1:1110:9415:11605	MT535574.1	95.913	416	17	0	1	416	257	672	0	676	Bacteria_Proteobacteria_Alphaproteobacteria_Rickettsiales_Rickettsiaceae_Rickettsia_Candidatus Rickettsia longicornii		PVIL-merged-M01780:105:000000000-CWNB3:1:1108:17415:14229	MK239931.1	100	402	0	0	1	402	257	658	0	743	Bacteria_Proteobacteria_Alphaproteobacteria_Rickettsiales_Anaplasmataceae_Anaplasma_Anaplasma phagocytophilum
NWSE-merged-M01780:105:000000000-CWNB3:1:1113:17720:4229	MT535574.1	99.007	403	3	1	1	403	257	658	0	721	Bacteria_Proteobacteria_Alphaproteobacteria_Rickettsiales_Rickettsiaceae_Rickettsia_Candidatus Rickettsia longicornii		PVIL-merged-M01780:105:000000000-CWNB3:1:1109:22056:15903	MK239931.1	99.751	402	0	1	1	401	257	658	0	736	Bacteria_Proteobacteria_Alphaproteobacteria_Rickettsiales_Anaplasmataceae_Anaplasma_Anaplasma phagocytophilum
NWSE-merged-M01780:105:000000000-CWNB3:1:2114:11153:17882	MT535574.1	96.766	402	13	0	1	402	257	658	0	671	Bacteria_Proteobacteria_Alphaproteobacteria_Rickettsiales_Rickettsiaceae_Rickettsia_Candidatus Rickettsia longicornii		PVIL-merged-M01780:105:000000000-CWNB3:1:1106:16166:18703	MK239931.1	100	402	0	0	1	402	257	658	0	743	Bacteria_Proteobacteria_Alphaproteobacteria_Rickettsiales_Anaplasmataceae_Anaplasma_Anaplasma phagocytophilum
NWSE-merged-M01780:105:000000000-CWNB3:1:2118:17469:6720	MT535574.1	99.005	402	4	0	1	402	257	658	0	721	Bacteria_Proteobacteria_Alphaproteobacteria_Rickettsiales_Rickettsiaceae_Rickettsia_Candidatus Rickettsia longicornii		PVIL-merged-M01780:105:000000000-CWNB3:1:1111:27149:11807	MK239931.1	100	402	0	0	1	402	257	658	0	743	Bacteria_Proteobacteria_Alphaproteobacteria_Rickettsiales_Anaplasmataceae_Anaplasma_Anaplasma phagocytophilum
NWSE-merged-M01780:105:000000000-CWNB3:1:1105:7201:11294	MT535574.1	99.254	402	3	0	1	402	257	658	0	726	Bacteria_Proteobacteria_Alphaproteobacteria_Rickettsiales_Rickettsiaceae_Rickettsia_Candidatus Rickettsia longicornii		PVIL-merged-M01780:105:000000000-CWNB3:1:1113:21988:9678	MK239931.1	100	402	0	0	1	402	257	658	0	743	Bacteria_Proteobacteria_Alphaproteobacteria_Rickettsiales_Anaplasmataceae_Anaplasma_Anaplasma phagocytophilum
NWSE-merged-M01780:105:000000000-CWNB3:1:1108:22685:21885	MT535574.1	98.259	402	7	0	1	402	257	658	0	704	Bacteria_Proteobacteria_Alphaproteobacteria_Rickettsiales_Rickettsiaceae_Rickettsia_Candidatus Rickettsia longicornii		PVIL-merged-M01780:105:000000000-CWNB3:1:1117:20004:2181	MK239931.1	100	402	0	0	1	402	257	658	0	743	Bacteria_Proteobacteria_Alphaproteobacteria_Rickettsiales_Anaplasmataceae_Anaplasma_Anaplasma phagocytophilum
NWSE-merged-M01780:105:000000000-CWNB3:1:1108:14901:23285	MT535574.1	95.2	375	18	0	1	375	257	631	1.87e-165	593	Bacteria_Proteobacteria_Alphaproteobacteria_Rickettsiales_Rickettsiaceae_Rickettsia_Candidatus Rickettsia longicornii		PVIL-merged-M01780:105:000000000-CWNB3:1:1118:11679:19410	MK239931.1	100	402	0	0	1	402	257	658	0	743	Bacteria_Proteobacteria_Alphaproteobacteria_Rickettsiales_Anaplasmataceae_Anaplasma_Anaplasma phagocytophilum
NWSE-merged-M01780:105:000000000-CWNB3:1:1112:10543:13896	MT535574.1	99.751	402	1	0	1	402	257	658	0	737	Bacteria_Proteobacteria_Alphaproteobacteria_Rickettsiales_Rickettsiaceae_Rickettsia_Candidatus Rickettsia longicornii		PVIL-merged-M01780:105:000000000-CWNB3:1:2102:24747:11788	MK239931.1	99.502	402	2	0	1	402	257	658	0	732	Bacteria_Proteobacteria_Alphaproteobacteria_Rickettsiales_Anaplasmataceae_Anaplasma_Anaplasma phagocytophilum
NWSE-merged-M01780:105:000000000-CWNB3:1:1112:26963:21164	MT535574.1	94.693	358	19	0	51	408	301	658	2.37e-154	556	Bacteria_Proteobacteria_Alphaproteobacteria_Rickettsiales_Rickettsiaceae_Rickettsia_Candidatus Rickettsia longicornii		PVIL-merged-M01780:105:000000000-CWNB3:1:2103:10327:17915	MK239931.1	99.502	402	2	0	1	402	257	658	0	732	Bacteria_Proteobacteria_Alphaproteobacteria_Rickettsiales_Anaplasmataceae_Anaplasma_Anaplasma phagocytophilum
NWSE-merged-M01780:105:000000000-CWNB3:1:1114:10588:15761	MT535574.1	99.005	402	4	0	1	402	257	658	0	721	Bacteria_Proteobacteria_Alphaproteobacteria_Rickettsiales_Rickettsiaceae_Rickettsia_Candidatus Rickettsia longicornii		PVIL-merged-M01780:105:000000000-CWNB3:1:2104:15757:4933	MK239931.1	98.259	402	7	0	1	402	257	658	0	704	Bacteria_Proteobacteria_Alphaproteobacteria_Rickettsiales_Anaplasmataceae_Anaplasma_Anaplasma phagocytophilum
NWSE-merged-M01780:105:000000000-CWNB3:1:2105:20018:9881	MT535574.1	99.254	402	3	0	1	402	257	658	0	726	Bacteria_Proteobacteria_Alphaproteobacteria_Rickettsiales_Rickettsiaceae_Rickettsia_Candidatus Rickettsia longicornii		PVIL-merged-M01780:105:000000000-CWNB3:1:2103:16938:23640	MK239931.1	100	402	0	0	1	402	257	658	0	743	Bacteria_Proteobacteria_Alphaproteobacteria_Rickettsiales_Anaplasmataceae_Anaplasma_Anaplasma phagocytophilum
NWSE-merged-M01780:105:000000000-CWNB3:1:2102:17020:13608	MT535574.1	99.254	402	3	0	1	402	257	658	0	726	Bacteria_Proteobacteria_Alphaproteobacteria_Rickettsiales_Rickettsiaceae_Rickettsia_Candidatus Rickettsia longicornii		PVIL-merged-M01780:105:000000000-CWNB3:1:2105:12519:4674	MK239931.1	100	402	0	0	1	402	257	658	0	743	Bacteria_Proteobacteria_Alphaproteobacteria_Rickettsiales_Anaplasmataceae_Anaplasma_Anaplasma phagocytophilum
NWSE-merged-M01780:105:000000000-CWNB3:1:2107:16323:13718	MT535574.1	98.511	403	6	0	1	403	257	659	0	712	Bacteria_Proteobacteria_Alphaproteobacteria_Rickettsiales_Rickettsiaceae_Rickettsia_Candidatus Rickettsia longicornii		PVIL-merged-M01780:105:000000000-CWNB3:1:2107:23724:10323	MK239931.1	100	402	0	0	1	402	257	658	0	743	Bacteria_Proteobacteria_Alphaproteobacteria_Rickettsiales_Anaplasmataceae_Anaplasma_Anaplasma phagocytophilum
NWSE-merged-M01780:105:000000000-CWNB3:1:2108:6936:8690	MT535574.1	99.005	402	4	0	1	402	257	658	0	721	Bacteria_Proteobacteria_Alphaproteobacteria_Rickettsiales_Rickettsiaceae_Rickettsia_Candidatus Rickettsia longicornii		PVIL-merged-M01780:105:000000000-CWNB3:1:2108:15412:2184	MK239931.1	100	402	0	0	1	402	257	658	0	743	Bacteria_Proteobacteria_Alphaproteobacteria_Rickettsiales_Anaplasmataceae_Anaplasma_Anaplasma phagocytophilum
NWSE-merged-M01780:105:000000000-CWNB3:1:2106:12593:22287	MT535574.1	96.667	390	13	0	1	390	257	646	0	649	Bacteria_Proteobacteria_Alphaproteobacteria_Rickettsiales_Rickettsiaceae_Rickettsia_Candidatus Rickettsia longicornii		PVIL-merged-M01780:105:000000000-CWNB3:1:2107:22425:23950	AY969012.1	98.01	402	8	0	1	402	311	712	0	699	Bacteria_Proteobacteria_Alphaproteobacteria_Rickettsiales_Anaplasmataceae_Anaplasma_Anaplasma phagocytophilum
NWSE-merged-M01780:105:000000000-CWNB3:1:2118:10863:15130	MT535574.1	97.475	396	10	0	1	396	257	652	0	676	Bacteria_Proteobacteria_Alphaproteobacteria_Rickettsiales_Rickettsiaceae_Rickettsia_Candidatus Rickettsia longicornii		PVIL-merged-M01780:105:000000000-CWNB3:1:2108:16748:7620	MK239931.1	99.751	402	1	0	1	402	257	658	0	737	Bacteria_Proteobacteria_Alphaproteobacteria_Rickettsiales_Anaplasmataceae_Anaplasma_Anaplasma phagocytophilum
NWSE-merged-M01780:105:000000000-CWNB3:1:1106:14999:24646	MT535574.1	99.254	402	3	0	1	402	257	658	0	726	Bacteria_Proteobacteria_Alphaproteobacteria_Rickettsiales_Rickettsiaceae_Rickettsia_Candidatus Rickettsia longicornii		PVIL-merged-M01780:105:000000000-CWNB3:1:2113:9539:5510	MK239931.1	99.502	402	2	0	1	402	257	658	0	732	Bacteria_Proteobacteria_Alphaproteobacteria_Rickettsiales_Anaplasmataceae_Anaplasma_Anaplasma phagocytophilum
NWSE-merged-M01780:105:000000000-CWNB3:1:1118:9081:13353	MT535574.1	98.259	402	7	0	1	402	257	658	0	704	Bacteria_Proteobacteria_Alphaproteobacteria_Rickettsiales_Rickettsiaceae_Rickettsia_Candidatus Rickettsia longicornii		PVIL-merged-M01780:105:000000000-CWNB3:1:2117:11109:16824	MK239931.1	99.751	402	1	0	1	402	257	658	0	737	Bacteria_Proteobacteria_Alphaproteobacteria_Rickettsiales_Anaplasmataceae_Anaplasma_Anaplasma phagocytophilum
NWSE-merged-M01780:105:000000000-CWNB3:1:1117:28181:14617	MT535574.1	99.005	402	4	0	1	402	257	658	0	721	Bacteria_Proteobacteria_Alphaproteobacteria_Rickettsiales_Rickettsiaceae_Rickettsia_Candidatus Rickettsia longicornii		PVIL-merged-M01780:105:000000000-CWNB3:1:1103:20515:19225	MK239931.1	100	402	0	0	1	402	257	658	0	743	Bacteria_Proteobacteria_Alphaproteobacteria_Rickettsiales_Anaplasmataceae_Anaplasma_Anaplasma phagocytophilum
NWSE-merged-M01780:105:000000000-CWNB3:1:1106:8957:24649	MT535574.1	98.272	405	7	0	1	405	257	661	0	710	Bacteria_Proteobacteria_Alphaproteobacteria_Rickettsiales_Rickettsiaceae_Rickettsia_Candidatus Rickettsia longicornii		PVIL-merged-M01780:105:000000000-CWNB3:1:1103:6837:11713	MK239931.1	100	402	0	0	1	402	257	658	0	743	Bacteria_Proteobacteria_Alphaproteobacteria_Rickettsiales_Anaplasmataceae_Anaplasma_Anaplasma phagocytophilum
NWSE-merged-M01780:105:000000000-CWNB3:1:1107:14260:18841	MT535574.1	97.761	402	9	0	1	402	257	658	0	693	Bacteria_Proteobacteria_Alphaproteobacteria_Rickettsiales_Rickettsiaceae_Rickettsia_Candidatus Rickettsia longicornii		PVIL-merged-M01780:105:000000000-CWNB3:1:1101:8337:21491	MK239931.1	100	402	0	0	1	402	257	658	0	743	Bacteria_Proteobacteria_Alphaproteobacteria_Rickettsiales_Anaplasmataceae_Anaplasma_Anaplasma phagocytophilum
NWSE-merged-M01780:105:000000000-CWNB3:1:1115:5512:21014	MT535574.1	98.259	402	7	0	1	402	257	658	0	704	Bacteria_Proteobacteria_Alphaproteobacteria_Rickettsiales_Rickettsiaceae_Rickettsia_Candidatus Rickettsia longicornii		PVIL-merged-M01780:105:000000000-CWNB3:1:1102:24057:19755	MK239931.1	100	402	0	0	1	402	257	658	0	743	Bacteria_Proteobacteria_Alphaproteobacteria_Rickettsiales_Anaplasmataceae_Anaplasma_Anaplasma phagocytophilum
NWSE-merged-M01780:105:000000000-CWNB3:1:1118:15596:21037	MT535574.1	95.771	402	17	0	1	402	257	658	0	649	Bacteria_Proteobacteria_Alphaproteobacteria_Rickettsiales_Rickettsiaceae_Rickettsia_Candidatus Rickettsia longicornii		PVIL-merged-M01780:105:000000000-CWNB3:1:1104:20549:21389	MK239931.1	99.751	402	1	0	1	402	257	658	0	737	Bacteria_Proteobacteria_Alphaproteobacteria_Rickettsiales_Anaplasmataceae_Anaplasma_Anaplasma phagocytophilum
NWSE-merged-M01780:105:000000000-CWNB3:1:1119:25514:10055	MT535574.1	98.507	402	6	0	1	402	257	658	0	710	Bacteria_Proteobacteria_Alphaproteobacteria_Rickettsiales_Rickettsiaceae_Rickettsia_Candidatus Rickettsia longicornii		PVIL-merged-M01780:105:000000000-CWNB3:1:1106:12761:4820	MK239931.1	100	402	0	0	1	402	257	658	0	743	Bacteria_Proteobacteria_Alphaproteobacteria_Rickettsiales_Anaplasmataceae_Anaplasma_Anaplasma phagocytophilum
NWSE-merged-M01780:105:000000000-CWNB3:1:2109:8378:11722	MT535574.1	96.241	399	15	0	1	399	257	655	0	654	Bacteria_Proteobacteria_Alphaproteobacteria_Rickettsiales_Rickettsiaceae_Rickettsia_Candidatus Rickettsia longicornii		PVIL-merged-M01780:105:000000000-CWNB3:1:1108:13181:12240	MK239931.1	100	402	0	0	1	402	257	658	0	743	Bacteria_Proteobacteria_Alphaproteobacteria_Rickettsiales_Anaplasmataceae_Anaplasma_Anaplasma phagocytophilum
NWSE-merged-M01780:105:000000000-CWNB3:1:2109:9292:13356	MT535574.1	93.462	413	25	2	1	412	257	668	5.03e-171	612	Bacteria_Proteobacteria_Alphaproteobacteria_Rickettsiales_Rickettsiaceae_Rickettsia_Candidatus Rickettsia longicornii		PVIL-merged-M01780:105:000000000-CWNB3:1:1109:18342:18305	MK239931.1	100	402	0	0	1	402	257	658	0	743	Bacteria_Proteobacteria_Alphaproteobacteria_Rickettsiales_Anaplasmataceae_Anaplasma_Anaplasma phagocytophilum
NWSE-merged-M01780:105:000000000-CWNB3:1:1109:29019:13810	MT535574.1	98.756	402	5	0	1	402	257	658	0	715	Bacteria_Proteobacteria_Alphaproteobacteria_Rickettsiales_Rickettsiaceae_Rickettsia_Candidatus Rickettsia longicornii		PVIL-merged-M01780:105:000000000-CWNB3:1:1105:15544:22148	MK239931.1	100	402	0	0	1	402	257	658	0	743	Bacteria_Proteobacteria_Alphaproteobacteria_Rickettsiales_Anaplasmataceae_Anaplasma_Anaplasma phagocytophilum
NWSE-merged-M01780:105:000000000-CWNB3:1:2110:28247:9710	MT535574.1	98.529	408	6	0	1	408	251	658	0	721	Bacteria_Proteobacteria_Alphaproteobacteria_Rickettsiales_Rickettsiaceae_Rickettsia_Candidatus Rickettsia longicornii		PVIL-merged-M01780:105:000000000-CWNB3:1:1108:12040:6222	MK239931.1	98.756	402	5	0	1	402	257	658	0	715	Bacteria_Proteobacteria_Alphaproteobacteria_Rickettsiales_Anaplasmataceae_Anaplasma_Anaplasma phagocytophilum
NWSE-merged-M01780:105:000000000-CWNB3:1:1104:22896:10412	MT535574.1	98.507	402	6	0	1	402	257	658	0	710	Bacteria_Proteobacteria_Alphaproteobacteria_Rickettsiales_Rickettsiaceae_Rickettsia_Candidatus Rickettsia longicornii		PVIL-merged-M01780:105:000000000-CWNB3:1:1117:9073:13519	MK239931.1	99.751	402	1	0	1	402	257	658	0	737	Bacteria_Proteobacteria_Alphaproteobacteria_Rickettsiales_Anaplasmataceae_Anaplasma_Anaplasma phagocytophilum
NWSE-merged-M01780:105:000000000-CWNB3:1:1111:20443:22333	MT535574.1	99.751	402	1	0	1	402	257	658	0	737	Bacteria_Proteobacteria_Alphaproteobacteria_Rickettsiales_Rickettsiaceae_Rickettsia_Candidatus Rickettsia longicornii		PVIL-merged-M01780:105:000000000-CWNB3:1:1118:16652:9391	MK239931.1	99.751	402	1	0	1	402	257	658	0	737	Bacteria_Proteobacteria_Alphaproteobacteria_Rickettsiales_Anaplasmataceae_Anaplasma_Anaplasma phagocytophilum
NWSE-merged-M01780:105:000000000-CWNB3:1:2104:27084:9201	MT535574.1	95.771	402	17	0	1	402	257	658	0	649	Bacteria_Proteobacteria_Alphaproteobacteria_Rickettsiales_Rickettsiaceae_Rickettsia_Candidatus Rickettsia longicornii		PVIL-merged-M01780:105:000000000-CWNB3:1:1118:15038:12329	AY969012.1	94.802	404	17	3	1	402	311	712	1.75e-175	627	Bacteria_Proteobacteria_Alphaproteobacteria_Rickettsiales_Anaplasmataceae_Anaplasma_Anaplasma phagocytophilum
NWSE-merged-M01780:105:000000000-CWNB3:1:2105:14678:14783	MT535574.1	96.766	402	13	0	1	402	257	658	0	671	Bacteria_Proteobacteria_Alphaproteobacteria_Rickettsiales_Rickettsiaceae_Rickettsia_Candidatus Rickettsia longicornii		PVIL-merged-M01780:105:000000000-CWNB3:1:2107:24794:11535	MK239931.1	100	402	0	0	1	402	257	658	0	743	Bacteria_Proteobacteria_Alphaproteobacteria_Rickettsiales_Anaplasmataceae_Anaplasma_Anaplasma phagocytophilum
NWSE-merged-M01780:105:000000000-CWNB3:1:1106:19053:16649	MT535574.1	99.005	402	4	0	1	402	257	658	0	721	Bacteria_Proteobacteria_Alphaproteobacteria_Rickettsiales_Rickettsiaceae_Rickettsia_Candidatus Rickettsia longicornii		PVIL-merged-M01780:105:000000000-CWNB3:1:2112:25220:8294	MK239931.1	99.751	402	1	0	1	402	257	658	0	737	Bacteria_Proteobacteria_Alphaproteobacteria_Rickettsiales_Anaplasmataceae_Anaplasma_Anaplasma phagocytophilum
NWSE-merged-M01780:105:000000000-CWNB3:1:1110:9547:22369	MT535574.1	99.502	402	2	0	1	402	257	658	0	732	Bacteria_Proteobacteria_Alphaproteobacteria_Rickettsiales_Rickettsiaceae_Rickettsia_Candidatus Rickettsia longicornii		PVIL-merged-M01780:105:000000000-CWNB3:1:2112:14619:3550	MK239931.1	100	402	0	0	1	402	257	658	0	743	Bacteria_Proteobacteria_Alphaproteobacteria_Rickettsiales_Anaplasmataceae_Anaplasma_Anaplasma phagocytophilum
NWSE-merged-M01780:105:000000000-CWNB3:1:1110:23883:22740	MT535574.1	98.01	402	8	0	1	402	257	658	0	699	Bacteria_Proteobacteria_Alphaproteobacteria_Rickettsiales_Rickettsiaceae_Rickettsia_Candidatus Rickettsia longicornii		PVIL-merged-M01780:105:000000000-CWNB3:1:2110:3316:14427	MK239931.1	99.751	402	1	0	1	402	257	658	0	737	Bacteria_Proteobacteria_Alphaproteobacteria_Rickettsiales_Anaplasmataceae_Anaplasma_Anaplasma phagocytophilum
NWSE-merged-M01780:105:000000000-CWNB3:1:1117:7075:21696	MT535574.1	94.132	409	24	0	1	409	257	665	2.31e-174	623	Bacteria_Proteobacteria_Alphaproteobacteria_Rickettsiales_Rickettsiaceae_Rickettsia_Candidatus Rickettsia longicornii		PVIL-merged-M01780:105:000000000-CWNB3:1:2114:22611:23691	AY969012.1	95.771	402	17	0	1	402	311	712	0	649	Bacteria_Proteobacteria_Alphaproteobacteria_Rickettsiales_Anaplasmataceae_Anaplasma_Anaplasma phagocytophilum
NWSE-merged-M01780:105:000000000-CWNB3:1:2106:24141:10831	MT535574.1	97.257	401	11	0	1	401	257	657	0	680	Bacteria_Proteobacteria_Alphaproteobacteria_Rickettsiales_Rickettsiaceae_Rickettsia_Candidatus Rickettsia longicornii		PVIL-merged-M01780:105:000000000-CWNB3:1:1104:21629:11157	MK239931.1	100	402	0	0	1	402	257	658	0	743	Bacteria_Proteobacteria_Alphaproteobacteria_Rickettsiales_Anaplasmataceae_Anaplasma_Anaplasma phagocytophilum
NWSE-merged-M01780:105:000000000-CWNB3:1:2109:6915:4400	MT535574.1	99.254	402	3	0	1	402	257	658	0	726	Bacteria_Proteobacteria_Alphaproteobacteria_Rickettsiales_Rickettsiaceae_Rickettsia_Candidatus Rickettsia longicornii		PVIL-merged-M01780:105:000000000-CWNB3:1:1102:10704:22277	MK239931.1	100	402	0	0	1	402	257	658	0	743	Bacteria_Proteobacteria_Alphaproteobacteria_Rickettsiales_Anaplasmataceae_Anaplasma_Anaplasma phagocytophilum
NWSE-merged-M01780:105:000000000-CWNB3:1:2116:21992:11459	MT535574.1	94.217	415	23	1	1	414	257	671	3.89e-177	632	Bacteria_Proteobacteria_Alphaproteobacteria_Rickettsiales_Rickettsiaceae_Rickettsia_Candidatus Rickettsia longicornii		PVIL-merged-M01780:105:000000000-CWNB3:1:1110:10183:18738	MK239931.1	100	402	0	0	1	402	257	658	0	743	Bacteria_Proteobacteria_Alphaproteobacteria_Rickettsiales_Anaplasmataceae_Anaplasma_Anaplasma phagocytophilum
NWSE-merged-M01780:105:000000000-CWNB3:1:2118:13953:18137	MT535574.1	97.714	350	8	0	1	350	257	606	3.03e-168	603	Bacteria_Proteobacteria_Alphaproteobacteria_Rickettsiales_Rickettsiaceae_Rickettsia_Candidatus Rickettsia longicornii		PVIL-merged-M01780:105:000000000-CWNB3:1:1113:16535:8770	MK239931.1	98.756	402	5	0	1	402	257	658	0	715	Bacteria_Proteobacteria_Alphaproteobacteria_Rickettsiales_Anaplasmataceae_Anaplasma_Anaplasma phagocytophilum
NWSE-merged-M01780:105:000000000-CWNB3:1:1106:14622:16249	MT535574.1	99.254	402	3	0	1	402	257	658	0	726	Bacteria_Proteobacteria_Alphaproteobacteria_Rickettsiales_Rickettsiaceae_Rickettsia_Candidatus Rickettsia longicornii		PVIL-merged-M01780:105:000000000-CWNB3:1:1114:24667:8146	AY969012.1	98.756	402	5	0	1	402	311	712	0	715	Bacteria_Proteobacteria_Alphaproteobacteria_Rickettsiales_Anaplasmataceae_Anaplasma_Anaplasma phagocytophilum
NWSE-merged-M01780:105:000000000-CWNB3:1:1112:22030:4156	MT535574.1	99.002	401	4	0	1	401	257	657	0	719	Bacteria_Proteobacteria_Alphaproteobacteria_Rickettsiales_Rickettsiaceae_Rickettsia_Candidatus Rickettsia longicornii		PVIL-merged-M01780:105:000000000-CWNB3:1:1119:2585:15793	MK239931.1	99.751	402	1	0	1	402	257	658	0	737	Bacteria_Proteobacteria_Alphaproteobacteria_Rickettsiales_Anaplasmataceae_Anaplasma_Anaplasma phagocytophilum
NWSE-merged-M01780:105:000000000-CWNB3:1:2112:11531:19948	MT535574.1	98.756	402	5	0	1	402	257	658	0	715	Bacteria_Proteobacteria_Alphaproteobacteria_Rickettsiales_Rickettsiaceae_Rickettsia_Candidatus Rickettsia longicornii		PVIL-merged-M01780:105:000000000-CWNB3:1:1116:23799:13156	AY969012.1	95.771	402	17	0	1	402	311	712	0	649	Bacteria_Proteobacteria_Alphaproteobacteria_Rickettsiales_Anaplasmataceae_Anaplasma_Anaplasma phagocytophilum
NWSE-merged-M01780:105:000000000-CWNB3:1:2116:7922:14819	MT535574.1	99.254	402	3	0	1	402	257	658	0	726	Bacteria_Proteobacteria_Alphaproteobacteria_Rickettsiales_Rickettsiaceae_Rickettsia_Candidatus Rickettsia longicornii		PVIL-merged-M01780:105:000000000-CWNB3:1:1116:7740:19853	AY969012.1	96.517	402	14	0	1	402	311	712	0	665	Bacteria_Proteobacteria_Alphaproteobacteria_Rickettsiales_Anaplasmataceae_Anaplasma_Anaplasma phagocytophilum
NWSE-merged-M01780:105:000000000-CWNB3:1:1104:15630:12886	MT535574.1	96.341	410	15	0	1	410	257	666	0	675	Bacteria_Proteobacteria_Alphaproteobacteria_Rickettsiales_Rickettsiaceae_Rickettsia_Candidatus Rickettsia longicornii		PVIL-merged-M01780:105:000000000-CWNB3:1:2101:28159:7403	MK239931.1	98.01	402	8	0	1	402	257	658	0	701	Bacteria_Proteobacteria_Alphaproteobacteria_Rickettsiales_Anaplasmataceae_Anaplasma_Anaplasma phagocytophilum
NWSE-merged-M01780:105:000000000-CWNB3:1:1103:12181:13982	MT535574.1	99.254	402	3	0	1	402	257	658	0	726	Bacteria_Proteobacteria_Alphaproteobacteria_Rickettsiales_Rickettsiaceae_Rickettsia_Candidatus Rickettsia longicornii		PVIL-merged-M01780:105:000000000-CWNB3:1:2102:20767:8757	MK239931.1	100	402	0	0	1	402	257	658	0	743	Bacteria_Proteobacteria_Alphaproteobacteria_Rickettsiales_Anaplasmataceae_Anaplasma_Anaplasma phagocytophilum
NWSE-merged-M01780:105:000000000-CWNB3:1:1105:16462:6260	MT535574.1	98.507	402	6	0	1	402	257	658	0	710	Bacteria_Proteobacteria_Alphaproteobacteria_Rickettsiales_Rickettsiaceae_Rickettsia_Candidatus Rickettsia longicornii		PVIL-merged-M01780:105:000000000-CWNB3:1:2102:11466:3909	MK239931.1	100	402	0	0	1	402	257	658	0	743	Bacteria_Proteobacteria_Alphaproteobacteria_Rickettsiales_Anaplasmataceae_Anaplasma_Anaplasma phagocytophilum
NWSE-merged-M01780:105:000000000-CWNB3:1:1115:17247:23315	MT535574.1	98.756	402	5	0	1	402	257	658	0	715	Bacteria_Proteobacteria_Alphaproteobacteria_Rickettsiales_Rickettsiaceae_Rickettsia_Candidatus Rickettsia longicornii		PVIL-merged-M01780:105:000000000-CWNB3:1:2107:4549:13571	MK239931.1	99.751	402	1	0	1	402	257	658	0	737	Bacteria_Proteobacteria_Alphaproteobacteria_Rickettsiales_Anaplasmataceae_Anaplasma_Anaplasma phagocytophilum
NWSE-merged-M01780:105:000000000-CWNB3:1:1118:14809:10383	MT535574.1	99.502	402	2	0	1	402	257	658	0	732	Bacteria_Proteobacteria_Alphaproteobacteria_Rickettsiales_Rickettsiaceae_Rickettsia_Candidatus Rickettsia longicornii		PVIL-merged-M01780:105:000000000-CWNB3:1:2107:14376:13931	MN227385.1	97.015	402	12	0	1	402	64	465	0	676	Bacteria_Proteobacteria_Alphaproteobacteria_Rickettsiales_Anaplasmataceae_Anaplasma_Anaplasma phagocytophilum
NWSE-merged-M01780:105:000000000-CWNB3:1:1119:14979:12367	MT535574.1	98.259	402	7	0	1	402	257	658	0	704	Bacteria_Proteobacteria_Alphaproteobacteria_Rickettsiales_Rickettsiaceae_Rickettsia_Candidatus Rickettsia longicornii		PVIL-merged-M01780:105:000000000-CWNB3:1:2107:24161:6749	MK239931.1	100	402	0	0	1	402	257	658	0	743	Bacteria_Proteobacteria_Alphaproteobacteria_Rickettsiales_Anaplasmataceae_Anaplasma_Anaplasma phagocytophilum
NWSE-merged-M01780:105:000000000-CWNB3:1:2114:9102:14695	MT535574.1	99.254	402	3	0	1	402	257	658	0	728	Bacteria_Proteobacteria_Alphaproteobacteria_Rickettsiales_Rickettsiaceae_Rickettsia_Candidatus Rickettsia longicornii		PVIL-merged-M01780:105:000000000-CWNB3:1:2108:16602:18301	MK239931.1	99.502	402	2	0	1	402	257	658	0	732	Bacteria_Proteobacteria_Alphaproteobacteria_Rickettsiales_Anaplasmataceae_Anaplasma_Anaplasma phagocytophilum
NWSE-merged-M01780:105:000000000-CWNB3:1:1105:27623:7692	MT535574.1	95.062	405	20	0	1	405	257	661	8.16e-179	638	Bacteria_Proteobacteria_Alphaproteobacteria_Rickettsiales_Rickettsiaceae_Rickettsia_Candidatus Rickettsia longicornii		PVIL-merged-M01780:105:000000000-CWNB3:1:2111:27527:17317	MK239931.1	100	402	0	0	1	402	257	658	0	743	Bacteria_Proteobacteria_Alphaproteobacteria_Rickettsiales_Anaplasmataceae_Anaplasma_Anaplasma phagocytophilum
NWSE-merged-M01780:105:000000000-CWNB3:1:1102:16906:23865	MT535574.1	98.263	403	7	0	1	403	257	659	0	706	Bacteria_Proteobacteria_Alphaproteobacteria_Rickettsiales_Rickettsiaceae_Rickettsia_Candidatus Rickettsia longicornii		PVIL-merged-M01780:105:000000000-CWNB3:1:2110:19947:22827	AY969012.1	96.02	402	16	0	1	402	311	712	0	654	Bacteria_Proteobacteria_Alphaproteobacteria_Rickettsiales_Anaplasmataceae_Anaplasma_Anaplasma phagocytophilum
NWSE-merged-M01780:105:000000000-CWNB3:1:1113:22744:5731	MT535574.1	97.324	411	11	0	1	411	257	667	0	699	Bacteria_Proteobacteria_Alphaproteobacteria_Rickettsiales_Rickettsiaceae_Rickettsia_Candidatus Rickettsia longicornii		PVIL-merged-M01780:105:000000000-CWNB3:1:2116:13854:17746	MK239931.1	100	402	0	0	1	402	257	658	0	743	Bacteria_Proteobacteria_Alphaproteobacteria_Rickettsiales_Anaplasmataceae_Anaplasma_Anaplasma phagocytophilum
NWSE-merged-M01780:105:000000000-CWNB3:1:1115:18391:18706	MT535574.1	99.25	400	3	0	1	400	257	656	0	723	Bacteria_Proteobacteria_Alphaproteobacteria_Rickettsiales_Rickettsiaceae_Rickettsia_Candidatus Rickettsia longicornii		PVIL-merged-M01780:105:000000000-CWNB3:1:2118:12760:15969	MK239931.1	100	402	0	0	1	402	257	658	0	743	Bacteria_Proteobacteria_Alphaproteobacteria_Rickettsiales_Anaplasmataceae_Anaplasma_Anaplasma phagocytophilum
NWSE-merged-M01780:105:000000000-CWNB3:1:1115:19072:19386	MT535574.1	97.243	399	11	0	1	399	257	655	0	676	Bacteria_Proteobacteria_Alphaproteobacteria_Rickettsiales_Rickettsiaceae_Rickettsia_Candidatus Rickettsia longicornii		PVIL-merged-M01780:105:000000000-CWNB3:1:1103:13825:10654	MK239931.1	99.502	402	2	0	1	402	257	658	0	732	Bacteria_Proteobacteria_Alphaproteobacteria_Rickettsiales_Anaplasmataceae_Anaplasma_Anaplasma phagocytophilum
NWSE-merged-M01780:105:000000000-CWNB3:1:2105:20885:14082	MT535574.1	99.005	402	4	0	1	402	257	658	0	721	Bacteria_Proteobacteria_Alphaproteobacteria_Rickettsiales_Rickettsiaceae_Rickettsia_Candidatus Rickettsia longicornii		PVIL-merged-M01780:105:000000000-CWNB3:1:1102:19211:9600	DQ458806.1	99.005	402	4	0	1	402	282	683	0	721	Bacteria_Proteobacteria_Alphaproteobacteria_Rickettsiales_Anaplasmataceae_Anaplasma_Anaplasma phagocytophilum
NWSE-merged-M01780:105:000000000-CWNB3:1:2117:22377:14536	MT535574.1	99.005	402	4	0	1	402	257	658	0	721	Bacteria_Proteobacteria_Alphaproteobacteria_Rickettsiales_Rickettsiaceae_Rickettsia_Candidatus Rickettsia longicornii		PVIL-merged-M01780:105:000000000-CWNB3:1:1106:20498:17492	MK239931.1	99.502	402	2	0	1	402	257	658	0	732	Bacteria_Proteobacteria_Alphaproteobacteria_Rickettsiales_Anaplasmataceae_Anaplasma_Anaplasma phagocytophilum
NWSE-merged-M01780:105:000000000-CWNB3:1:1106:15956:22754	MT535574.1	99.254	402	3	0	1	402	257	658	0	726	Bacteria_Proteobacteria_Alphaproteobacteria_Rickettsiales_Rickettsiaceae_Rickettsia_Candidatus Rickettsia longicornii		PVIL-merged-M01780:105:000000000-CWNB3:1:1106:24587:7685	MK239931.1	98.756	402	5	0	1	402	257	658	0	715	Bacteria_Proteobacteria_Alphaproteobacteria_Rickettsiales_Anaplasmataceae_Anaplasma_Anaplasma phagocytophilum
NWSE-merged-M01780:105:000000000-CWNB3:1:1108:19656:17866	MT535574.1	95.771	402	17	0	1	402	257	658	0	649	Bacteria_Proteobacteria_Alphaproteobacteria_Rickettsiales_Rickettsiaceae_Rickettsia_Candidatus Rickettsia longicornii		PVIL-merged-M01780:105:000000000-CWNB3:1:1106:26464:19665	MK239931.1	99.751	402	1	0	1	402	257	658	0	737	Bacteria_Proteobacteria_Alphaproteobacteria_Rickettsiales_Anaplasmataceae_Anaplasma_Anaplasma phagocytophilum
NWSE-merged-M01780:105:000000000-CWNB3:1:1110:25864:10751	MT535574.1	98.259	402	7	0	1	402	257	658	0	704	Bacteria_Proteobacteria_Alphaproteobacteria_Rickettsiales_Rickettsiaceae_Rickettsia_Candidatus Rickettsia longicornii		PVIL-merged-M01780:105:000000000-CWNB3:1:1109:25166:16593	MK239931.1	100	402	0	0	1	402	257	658	0	743	Bacteria_Proteobacteria_Alphaproteobacteria_Rickettsiales_Anaplasmataceae_Anaplasma_Anaplasma phagocytophilum
NWSE-merged-M01780:105:000000000-CWNB3:1:2105:25567:19149	MT535574.1	98.259	402	7	0	1	402	257	658	0	704	Bacteria_Proteobacteria_Alphaproteobacteria_Rickettsiales_Rickettsiaceae_Rickettsia_Candidatus Rickettsia longicornii		PVIL-merged-M01780:105:000000000-CWNB3:1:1111:4609:19444	AY969012.1	95.771	402	17	0	1	402	311	712	0	649	Bacteria_Proteobacteria_Alphaproteobacteria_Rickettsiales_Anaplasmataceae_Anaplasma_Anaplasma phagocytophilum
NWSE-merged-M01780:105:000000000-CWNB3:1:1112:28311:13922	MT535574.1	98.507	402	6	0	1	402	257	658	0	710	Bacteria_Proteobacteria_Alphaproteobacteria_Rickettsiales_Rickettsiaceae_Rickettsia_Candidatus Rickettsia longicornii		PVIL-merged-M01780:105:000000000-CWNB3:1:1113:13226:3573	MK239931.1	100	402	0	0	1	402	257	658	0	743	Bacteria_Proteobacteria_Alphaproteobacteria_Rickettsiales_Anaplasmataceae_Anaplasma_Anaplasma phagocytophilum
NWSE-merged-M01780:105:000000000-CWNB3:1:1115:21257:14031	MT535574.1	98.259	402	7	0	1	402	257	658	0	704	Bacteria_Proteobacteria_Alphaproteobacteria_Rickettsiales_Rickettsiaceae_Rickettsia_Candidatus Rickettsia longicornii		PVIL-merged-M01780:105:000000000-CWNB3:1:1115:21267:9524	AY969012.1	98.756	402	5	0	1	402	311	712	0	715	Bacteria_Proteobacteria_Alphaproteobacteria_Rickettsiales_Anaplasmataceae_Anaplasma_Anaplasma phagocytophilum
NWSE-merged-M01780:105:000000000-CWNB3:1:1116:17025:15215	MT535574.1	98.507	402	6	0	1	402	257	658	0	710	Bacteria_Proteobacteria_Alphaproteobacteria_Rickettsiales_Rickettsiaceae_Rickettsia_Candidatus Rickettsia longicornii		PVIL-merged-M01780:105:000000000-CWNB3:1:1118:13752:4672	MK239931.1	100	402	0	0	1	402	257	658	0	743	Bacteria_Proteobacteria_Alphaproteobacteria_Rickettsiales_Anaplasmataceae_Anaplasma_Anaplasma phagocytophilum
NWSE-merged-M01780:105:000000000-CWNB3:1:2118:14544:18167	MT535574.1	93.3	403	27	0	1	403	257	659	4.95e-166	595	Bacteria_Proteobacteria_Alphaproteobacteria_Rickettsiales_Rickettsiaceae_Rickettsia_Candidatus Rickettsia longicornii		PVIL-merged-M01780:105:000000000-CWNB3:1:1117:12636:20825	MK239931.1	100	402	0	0	1	402	257	658	0	743	Bacteria_Proteobacteria_Alphaproteobacteria_Rickettsiales_Anaplasmataceae_Anaplasma_Anaplasma phagocytophilum
NWSE-merged-M01780:105:000000000-CWNB3:1:1119:27731:6372	MT535574.1	98.507	402	6	0	1	402	257	658	0	710	Bacteria_Proteobacteria_Alphaproteobacteria_Rickettsiales_Rickettsiaceae_Rickettsia_Candidatus Rickettsia longicornii		PVIL-merged-M01780:105:000000000-CWNB3:1:1119:4190:11743	AY969012.1	95.771	402	17	0	1	402	311	712	0	649	Bacteria_Proteobacteria_Alphaproteobacteria_Rickettsiales_Anaplasmataceae_Anaplasma_Anaplasma phagocytophilum
NWSE-merged-M01780:105:000000000-CWNB3:1:1119:11895:17513	MT535574.1	98.756	402	5	0	1	402	257	658	0	715	Bacteria_Proteobacteria_Alphaproteobacteria_Rickettsiales_Rickettsiaceae_Rickettsia_Candidatus Rickettsia longicornii		PVIL-merged-M01780:105:000000000-CWNB3:1:2101:11451:19543	MK239931.1	98.756	402	5	0	1	402	257	658	0	715	Bacteria_Proteobacteria_Alphaproteobacteria_Rickettsiales_Anaplasmataceae_Anaplasma_Anaplasma phagocytophilum
NWSE-merged-M01780:105:000000000-CWNB3:1:2105:20679:16964	MT535574.1	95.037	403	18	2	1	402	257	658	3.76e-177	632	Bacteria_Proteobacteria_Alphaproteobacteria_Rickettsiales_Rickettsiaceae_Rickettsia_Candidatus Rickettsia longicornii		PVIL-merged-M01780:105:000000000-CWNB3:1:2101:23305:14925	AY969012.1	96.517	402	14	0	1	402	311	712	0	665	Bacteria_Proteobacteria_Alphaproteobacteria_Rickettsiales_Anaplasmataceae_Anaplasma_Anaplasma phagocytophilum
NWSE-merged-M01780:105:000000000-CWNB3:1:2104:18887:18179	MT535574.1	99.502	402	2	0	1	402	257	658	0	732	Bacteria_Proteobacteria_Alphaproteobacteria_Rickettsiales_Rickettsiaceae_Rickettsia_Candidatus Rickettsia longicornii		PVIL-merged-M01780:105:000000000-CWNB3:1:2103:16110:17068	MK239931.1	100	402	0	0	1	402	257	658	0	743	Bacteria_Proteobacteria_Alphaproteobacteria_Rickettsiales_Anaplasmataceae_Anaplasma_Anaplasma phagocytophilum
NWSE-merged-M01780:105:000000000-CWNB3:1:2107:23008:23346	MT535574.1	95.771	402	15	2	2	402	258	658	0	647	Bacteria_Proteobacteria_Alphaproteobacteria_Rickettsiales_Rickettsiaceae_Rickettsia_Candidatus Rickettsia longicornii		PVIL-merged-M01780:105:000000000-CWNB3:1:2103:11526:12494	MK239931.1	100	402	0	0	1	402	257	658	0	743	Bacteria_Proteobacteria_Alphaproteobacteria_Rickettsiales_Anaplasmataceae_Anaplasma_Anaplasma phagocytophilum
NWSE-merged-M01780:105:000000000-CWNB3:1:2112:16793:13373	MT535574.1	99.751	402	1	0	1	402	257	658	0	737	Bacteria_Proteobacteria_Alphaproteobacteria_Rickettsiales_Rickettsiaceae_Rickettsia_Candidatus Rickettsia longicornii		PVIL-merged-M01780:105:000000000-CWNB3:1:2104:18051:19852	MK239931.1	100	402	0	0	1	402	257	658	0	743	Bacteria_Proteobacteria_Alphaproteobacteria_Rickettsiales_Anaplasmataceae_Anaplasma_Anaplasma phagocytophilum
NWSE-merged-M01780:105:000000000-CWNB3:1:1104:17753:18103	MT535574.1	97.494	399	10	0	1	399	257	655	0	682	Bacteria_Proteobacteria_Alphaproteobacteria_Rickettsiales_Rickettsiaceae_Rickettsia_Candidatus Rickettsia longicornii		PVIL-merged-M01780:105:000000000-CWNB3:1:2105:9043:10361	MK239931.1	99.751	402	1	0	1	402	257	658	0	737	Bacteria_Proteobacteria_Alphaproteobacteria_Rickettsiales_Anaplasmataceae_Anaplasma_Anaplasma phagocytophilum
NWSE-merged-M01780:105:000000000-CWNB3:1:1104:18540:21530	MT535574.1	98.756	402	5	0	1	402	257	658	0	715	Bacteria_Proteobacteria_Alphaproteobacteria_Rickettsiales_Rickettsiaceae_Rickettsia_Candidatus Rickettsia longicornii		PVIL-merged-M01780:105:000000000-CWNB3:1:2108:17227:14748	MK239931.1	100	402	0	0	1	402	257	658	0	743	Bacteria_Proteobacteria_Alphaproteobacteria_Rickettsiales_Anaplasmataceae_Anaplasma_Anaplasma phagocytophilum
NWSE-merged-M01780:105:000000000-CWNB3:1:1105:15641:24031	MT535574.1	99.254	402	3	0	1	402	257	658	0	726	Bacteria_Proteobacteria_Alphaproteobacteria_Rickettsiales_Rickettsiaceae_Rickettsia_Candidatus Rickettsia longicornii		PVIL-merged-M01780:105:000000000-CWNB3:1:2108:21306:11971	MK239931.1	100	402	0	0	1	402	257	658	0	743	Bacteria_Proteobacteria_Alphaproteobacteria_Rickettsiales_Anaplasmataceae_Anaplasma_Anaplasma phagocytophilum
NWSE-merged-M01780:105:000000000-CWNB3:1:1109:12298:17718	MT535574.1	99.502	402	2	0	1	402	257	658	0	732	Bacteria_Proteobacteria_Alphaproteobacteria_Rickettsiales_Rickettsiaceae_Rickettsia_Candidatus Rickettsia longicornii		PVIL-merged-M01780:105:000000000-CWNB3:1:2111:5314:22367	MK239931.1	99.502	402	2	0	1	402	257	658	0	732	Bacteria_Proteobacteria_Alphaproteobacteria_Rickettsiales_Anaplasmataceae_Anaplasma_Anaplasma phagocytophilum
NWSE-merged-M01780:105:000000000-CWNB3:1:1118:10918:15837	MT535574.1	99.751	402	1	0	1	402	257	658	0	737	Bacteria_Proteobacteria_Alphaproteobacteria_Rickettsiales_Rickettsiaceae_Rickettsia_Candidatus Rickettsia longicornii		PVIL-merged-M01780:105:000000000-CWNB3:1:2113:24679:9058	MK239931.1	100	402	0	0	1	402	257	658	0	743	Bacteria_Proteobacteria_Alphaproteobacteria_Rickettsiales_Anaplasmataceae_Anaplasma_Anaplasma phagocytophilum
NWSE-merged-M01780:105:000000000-CWNB3:1:2116:26705:17186	MT535574.1	95.761	401	17	0	1	401	257	657	0	647	Bacteria_Proteobacteria_Alphaproteobacteria_Rickettsiales_Rickettsiaceae_Rickettsia_Candidatus Rickettsia longicornii		PVIL-merged-M01780:105:000000000-CWNB3:1:2113:6747:20262	MK239931.1	99.254	402	3	0	1	402	257	658	0	726	Bacteria_Proteobacteria_Alphaproteobacteria_Rickettsiales_Anaplasmataceae_Anaplasma_Anaplasma phagocytophilum
NWSE-merged-M01780:105:000000000-CWNB3:1:1107:18592:21648	MT535574.1	98.01	402	8	0	1	402	257	658	0	699	Bacteria_Proteobacteria_Alphaproteobacteria_Rickettsiales_Rickettsiaceae_Rickettsia_Candidatus Rickettsia longicornii		PVIL-merged-M01780:105:000000000-CWNB3:1:2117:25087:14064	MN227385.1	99.254	402	3	0	1	402	64	465	0	726	Bacteria_Proteobacteria_Alphaproteobacteria_Rickettsiales_Anaplasmataceae_Anaplasma_Anaplasma phagocytophilum
NWSE-merged-M01780:105:000000000-CWNB3:1:1112:26475:4966	MT535574.1	99.502	402	1	1	1	401	257	658	0	730	Bacteria_Proteobacteria_Alphaproteobacteria_Rickettsiales_Rickettsiaceae_Rickettsia_Candidatus Rickettsia longicornii		PVIL-merged-M01780:105:000000000-CWNB3:1:2115:23311:22721	MK239931.1	99.502	402	2	0	1	402	257	658	0	732	Bacteria_Proteobacteria_Alphaproteobacteria_Rickettsiales_Anaplasmataceae_Anaplasma_Anaplasma phagocytophilum
NWSE-merged-M01780:105:000000000-CWNB3:1:1118:20208:12131	MT535574.1	98.01	402	8	0	1	402	257	658	0	699	Bacteria_Proteobacteria_Alphaproteobacteria_Rickettsiales_Rickettsiaceae_Rickettsia_Candidatus Rickettsia longicornii		PVIL-merged-M01780:105:000000000-CWNB3:1:2118:8435:8636	MK239931.1	100	402	0	0	1	402	257	658	0	743	Bacteria_Proteobacteria_Alphaproteobacteria_Rickettsiales_Anaplasmataceae_Anaplasma_Anaplasma phagocytophilum
NWSE-merged-M01780:105:000000000-CWNB3:1:2112:9139:15392	MT535574.1	97.264	402	11	0	1	402	257	658	0	684	Bacteria_Proteobacteria_Alphaproteobacteria_Rickettsiales_Rickettsiaceae_Rickettsia_Candidatus Rickettsia longicornii		PVIL-merged-M01780:105:000000000-CWNB3:1:1103:14209:6505	MK239931.1	100	402	0	0	1	402	257	658	0	743	Bacteria_Proteobacteria_Alphaproteobacteria_Rickettsiales_Anaplasmataceae_Anaplasma_Anaplasma phagocytophilum
NWSE-merged-M01780:105:000000000-CWNB3:1:1108:26786:5166	MT535574.1	98.507	402	6	0	1	402	257	658	0	710	Bacteria_Proteobacteria_Alphaproteobacteria_Rickettsiales_Rickettsiaceae_Rickettsia_Candidatus Rickettsia longicornii		PVIL-merged-M01780:105:000000000-CWNB3:1:1106:12622:4652	MK239931.1	100	402	0	0	1	402	257	658	0	743	Bacteria_Proteobacteria_Alphaproteobacteria_Rickettsiales_Anaplasmataceae_Anaplasma_Anaplasma phagocytophilum
NWSE-merged-M01780:105:000000000-CWNB3:1:1114:27411:6702	MT535574.1	99.005	402	4	0	1	402	257	658	0	721	Bacteria_Proteobacteria_Alphaproteobacteria_Rickettsiales_Rickettsiaceae_Rickettsia_Candidatus Rickettsia longicornii		PVIL-merged-M01780:105:000000000-CWNB3:1:1106:13951:16367	MK239931.1	99.751	402	1	0	1	402	257	658	0	737	Bacteria_Proteobacteria_Alphaproteobacteria_Rickettsiales_Anaplasmataceae_Anaplasma_Anaplasma phagocytophilum
NWSE-merged-M01780:105:000000000-CWNB3:1:2102:25730:11000	MT535574.1	98.507	402	6	0	1	402	257	658	0	710	Bacteria_Proteobacteria_Alphaproteobacteria_Rickettsiales_Rickettsiaceae_Rickettsia_Candidatus Rickettsia longicornii		PVIL-merged-M01780:105:000000000-CWNB3:1:1105:21094:23816	MK239931.1	99.751	402	1	0	1	402	257	658	0	737	Bacteria_Proteobacteria_Alphaproteobacteria_Rickettsiales_Anaplasmataceae_Anaplasma_Anaplasma phagocytophilum
NWSE-merged-M01780:105:000000000-CWNB3:1:2117:23936:18948	MT535574.1	96.659	419	13	1	1	418	240	658	0	695	Bacteria_Proteobacteria_Alphaproteobacteria_Rickettsiales_Rickettsiaceae_Rickettsia_Candidatus Rickettsia longicornii		PVIL-merged-M01780:105:000000000-CWNB3:1:1111:24244:17511	MK239931.1	100	402	0	0	1	402	257	658	0	743	Bacteria_Proteobacteria_Alphaproteobacteria_Rickettsiales_Anaplasmataceae_Anaplasma_Anaplasma phagocytophilum
NWSE-merged-M01780:105:000000000-CWNB3:1:2119:18965:17066	MT535574.1	98.507	402	6	0	1	402	257	658	0	710	Bacteria_Proteobacteria_Alphaproteobacteria_Rickettsiales_Rickettsiaceae_Rickettsia_Candidatus Rickettsia longicornii		PVIL-merged-M01780:105:000000000-CWNB3:1:1113:24669:16219	MK239931.1	100	402	0	0	1	402	257	658	0	743	Bacteria_Proteobacteria_Alphaproteobacteria_Rickettsiales_Anaplasmataceae_Anaplasma_Anaplasma phagocytophilum
NWSE-merged-M01780:105:000000000-CWNB3:1:1111:23110:21707	MT535574.1	98.759	403	5	0	1	403	257	659	0	717	Bacteria_Proteobacteria_Alphaproteobacteria_Rickettsiales_Rickettsiaceae_Rickettsia_Candidatus Rickettsia longicornii		PVIL-merged-M01780:105:000000000-CWNB3:1:1118:27796:14857	MK239931.1	100	402	0	0	1	402	257	658	0	743	Bacteria_Proteobacteria_Alphaproteobacteria_Rickettsiales_Anaplasmataceae_Anaplasma_Anaplasma phagocytophilum
NWSE-merged-M01780:105:000000000-CWNB3:1:1118:4645:13401	MT535574.1	99.005	402	4	0	1	402	257	658	0	721	Bacteria_Proteobacteria_Alphaproteobacteria_Rickettsiales_Rickettsiaceae_Rickettsia_Candidatus Rickettsia longicornii		PVIL-merged-M01780:105:000000000-CWNB3:1:1115:5649:8348	MK239931.1	100	402	0	0	1	402	257	658	0	743	Bacteria_Proteobacteria_Alphaproteobacteria_Rickettsiales_Anaplasmataceae_Anaplasma_Anaplasma phagocytophilum
NWSE-merged-M01780:105:000000000-CWNB3:1:2111:23527:16062	MT535574.1	99.254	402	3	0	1	402	257	658	0	726	Bacteria_Proteobacteria_Alphaproteobacteria_Rickettsiales_Rickettsiaceae_Rickettsia_Candidatus Rickettsia longicornii		PVIL-merged-M01780:105:000000000-CWNB3:1:1116:14155:19744	MK239931.1	100	402	0	0	1	402	257	658	0	743	Bacteria_Proteobacteria_Alphaproteobacteria_Rickettsiales_Anaplasmataceae_Anaplasma_Anaplasma phagocytophilum
NWSE-merged-M01780:105:000000000-CWNB3:1:1108:10830:12208	MT535574.1	98.756	402	5	0	1	402	257	658	0	715	Bacteria_Proteobacteria_Alphaproteobacteria_Rickettsiales_Rickettsiaceae_Rickettsia_Candidatus Rickettsia longicornii		PVIL-merged-M01780:105:000000000-CWNB3:1:2103:23744:20434	MK239931.1	100	402	0	0	1	402	257	658	0	743	Bacteria_Proteobacteria_Alphaproteobacteria_Rickettsiales_Anaplasmataceae_Anaplasma_Anaplasma phagocytophilum
NWSE-merged-M01780:105:000000000-CWNB3:1:1112:20300:16896	MT535574.1	97.291	406	11	0	1	406	257	662	0	689	Bacteria_Proteobacteria_Alphaproteobacteria_Rickettsiales_Rickettsiaceae_Rickettsia_Candidatus Rickettsia longicornii		PVIL-merged-M01780:105:000000000-CWNB3:1:2105:20250:2499	MK239931.1	98.753	401	5	0	1	401	257	657	0	713	Bacteria_Proteobacteria_Alphaproteobacteria_Rickettsiales_Anaplasmataceae_Anaplasma_Anaplasma phagocytophilum
NWSE-merged-M01780:105:000000000-CWNB3:1:1103:17724:12529	MT535574.1	98.507	402	6	0	1	402	257	658	0	710	Bacteria_Proteobacteria_Alphaproteobacteria_Rickettsiales_Rickettsiaceae_Rickettsia_Candidatus Rickettsia longicornii		PVIL-merged-M01780:105:000000000-CWNB3:1:2107:21111:10583	AY969012.1	94.554	404	18	3	1	402	311	712	8.13e-174	621	Bacteria_Proteobacteria_Alphaproteobacteria_Rickettsiales_Anaplasmataceae_Anaplasma_Anaplasma phagocytophilum
NWSE-merged-M01780:105:000000000-CWNB3:1:1106:6330:22414	MT535574.1	97.761	402	9	0	1	402	257	658	0	693	Bacteria_Proteobacteria_Alphaproteobacteria_Rickettsiales_Rickettsiaceae_Rickettsia_Candidatus Rickettsia longicornii		PVIL-merged-M01780:105:000000000-CWNB3:1:2108:3172:14560	MK239931.1	99.751	402	1	0	1	402	257	658	0	737	Bacteria_Proteobacteria_Alphaproteobacteria_Rickettsiales_Anaplasmataceae_Anaplasma_Anaplasma phagocytophilum
NWSE-merged-M01780:105:000000000-CWNB3:1:1106:26797:16688	MT535574.1	98.259	402	7	0	1	402	257	658	0	704	Bacteria_Proteobacteria_Alphaproteobacteria_Rickettsiales_Rickettsiaceae_Rickettsia_Candidatus Rickettsia longicornii		PVIL-merged-M01780:105:000000000-CWNB3:1:2108:23685:7490	MK239931.1	100	402	0	0	1	402	257	658	0	743	Bacteria_Proteobacteria_Alphaproteobacteria_Rickettsiales_Anaplasmataceae_Anaplasma_Anaplasma phagocytophilum
NWSE-merged-M01780:105:000000000-CWNB3:1:1117:7716:15518	MT535574.1	99.254	402	3	0	1	402	257	658	0	726	Bacteria_Proteobacteria_Alphaproteobacteria_Rickettsiales_Rickettsiaceae_Rickettsia_Candidatus Rickettsia longicornii		PVIL-merged-M01780:105:000000000-CWNB3:1:2111:10341:14029	AY969012.1	94.802	404	17	3	1	402	311	712	1.75e-175	627	Bacteria_Proteobacteria_Alphaproteobacteria_Rickettsiales_Anaplasmataceae_Anaplasma_Anaplasma phagocytophilum
NWSE-merged-M01780:105:000000000-CWNB3:1:2107:24745:10625	MT535574.1	99.005	402	4	0	1	402	257	658	0	721	Bacteria_Proteobacteria_Alphaproteobacteria_Rickettsiales_Rickettsiaceae_Rickettsia_Candidatus Rickettsia longicornii		PVIL-merged-M01780:105:000000000-CWNB3:1:2110:16620:23444	MK239931.1	100	402	0	0	1	402	257	658	0	743	Bacteria_Proteobacteria_Alphaproteobacteria_Rickettsiales_Anaplasmataceae_Anaplasma_Anaplasma phagocytophilum
NWSE-merged-M01780:105:000000000-CWNB3:1:2114:18340:11015	MT535574.1	98.044	409	8	0	1	409	257	665	0	712	Bacteria_Proteobacteria_Alphaproteobacteria_Rickettsiales_Rickettsiaceae_Rickettsia_Candidatus Rickettsia longicornii		PVIL-merged-M01780:105:000000000-CWNB3:1:2115:23893:16187	MK239931.1	100	402	0	0	1	402	257	658	0	743	Bacteria_Proteobacteria_Alphaproteobacteria_Rickettsiales_Anaplasmataceae_Anaplasma_Anaplasma phagocytophilum
NWSE-merged-M01780:105:000000000-CWNB3:1:2117:10497:11481	MT535574.1	99.751	402	1	0	1	402	257	658	0	737	Bacteria_Proteobacteria_Alphaproteobacteria_Rickettsiales_Rickettsiaceae_Rickettsia_Candidatus Rickettsia longicornii		PVIL-merged-M01780:105:000000000-CWNB3:1:2115:23767:10625	MK239931.1	99.751	402	1	0	1	402	257	658	0	737	Bacteria_Proteobacteria_Alphaproteobacteria_Rickettsiales_Anaplasmataceae_Anaplasma_Anaplasma phagocytophilum
NWSE-merged-M01780:105:000000000-CWNB3:1:1112:6970:19140	MT535574.1	99.254	402	2	1	1	401	257	658	0	725	Bacteria_Proteobacteria_Alphaproteobacteria_Rickettsiales_Rickettsiaceae_Rickettsia_Candidatus Rickettsia longicornii		PVIL-merged-M01780:105:000000000-CWNB3:1:2116:26913:7180	MK239931.1	100	402	0	0	1	402	257	658	0	743	Bacteria_Proteobacteria_Alphaproteobacteria_Rickettsiales_Anaplasmataceae_Anaplasma_Anaplasma phagocytophilum
NWSE-merged-M01780:105:000000000-CWNB3:1:2108:26977:12312	MT535574.1	96.324	408	15	0	1	408	257	664	0	671	Bacteria_Proteobacteria_Alphaproteobacteria_Rickettsiales_Rickettsiaceae_Rickettsia_Candidatus Rickettsia longicornii		PVIL-merged-M01780:105:000000000-CWNB3:1:2118:14567:9651	MK239931.1	100	402	0	0	1	402	257	658	0	743	Bacteria_Proteobacteria_Alphaproteobacteria_Rickettsiales_Anaplasmataceae_Anaplasma_Anaplasma phagocytophilum
NWSE-merged-M01780:105:000000000-CWNB3:1:2117:20803:18301	MT535574.1	96.03	403	14	2	1	402	257	658	0	654	Bacteria_Proteobacteria_Alphaproteobacteria_Rickettsiales_Rickettsiaceae_Rickettsia_Candidatus Rickettsia longicornii		PVIL-merged-M01780:105:000000000-CWNB3:1:1103:3085:8308	AY969012.1	93.3	403	26	1	1	402	311	713	1.77e-165	593	Bacteria_Proteobacteria_Alphaproteobacteria_Rickettsiales_Anaplasmataceae_Anaplasma_Anaplasma phagocytophilum
NWSE-merged-M01780:105:000000000-CWNB3:1:1108:24183:5181	MT535574.1	97.512	402	10	0	1	402	257	658	0	688	Bacteria_Proteobacteria_Alphaproteobacteria_Rickettsiales_Rickettsiaceae_Rickettsia_Candidatus Rickettsia longicornii		PVIL-merged-M01780:105:000000000-CWNB3:1:1101:15335:16371	MK239931.1	100	402	0	0	1	402	257	658	0	743	Bacteria_Proteobacteria_Alphaproteobacteria_Rickettsiales_Anaplasmataceae_Anaplasma_Anaplasma phagocytophilum
NWSE-merged-M01780:105:000000000-CWNB3:1:1111:18166:18826	MT535574.1	96.829	410	13	0	1	410	257	666	0	686	Bacteria_Proteobacteria_Alphaproteobacteria_Rickettsiales_Rickettsiaceae_Rickettsia_Candidatus Rickettsia longicornii		PVIL-merged-M01780:105:000000000-CWNB3:1:1106:11306:10405	MK239931.1	100	402	0	0	1	402	257	658	0	743	Bacteria_Proteobacteria_Alphaproteobacteria_Rickettsiales_Anaplasmataceae_Anaplasma_Anaplasma phagocytophilum
NWSE-merged-M01780:105:000000000-CWNB3:1:1113:25122:7490	MT535574.1	99.254	402	3	0	1	402	257	658	0	726	Bacteria_Proteobacteria_Alphaproteobacteria_Rickettsiales_Rickettsiaceae_Rickettsia_Candidatus Rickettsia longicornii		PVIL-merged-M01780:105:000000000-CWNB3:1:1109:27309:14760	MK239931.1	100	402	0	0	1	402	257	658	0	743	Bacteria_Proteobacteria_Alphaproteobacteria_Rickettsiales_Anaplasmataceae_Anaplasma_Anaplasma phagocytophilum
NWSE-merged-M01780:105:000000000-CWNB3:1:1117:19213:12282	MT535574.1	99.751	402	1	0	1	402	257	658	0	737	Bacteria_Proteobacteria_Alphaproteobacteria_Rickettsiales_Rickettsiaceae_Rickettsia_Candidatus Rickettsia longicornii		PVIL-merged-M01780:105:000000000-CWNB3:1:1113:20466:5631	MK239931.1	100	402	0	0	1	402	257	658	0	743	Bacteria_Proteobacteria_Alphaproteobacteria_Rickettsiales_Anaplasmataceae_Anaplasma_Anaplasma phagocytophilum
NWSE-merged-M01780:105:000000000-CWNB3:1:1113:27591:16222	MT535574.1	97.512	402	10	0	1	402	257	658	0	688	Bacteria_Proteobacteria_Alphaproteobacteria_Rickettsiales_Rickettsiaceae_Rickettsia_Candidatus Rickettsia longicornii		PVIL-merged-M01780:105:000000000-CWNB3:1:1112:20417:24490	MK239931.1	99.751	402	1	0	1	402	257	658	0	737	Bacteria_Proteobacteria_Alphaproteobacteria_Rickettsiales_Anaplasmataceae_Anaplasma_Anaplasma phagocytophilum
NWSE-merged-M01780:105:000000000-CWNB3:1:2107:16917:12144	MT535574.1	98.507	402	6	0	1	402	257	658	0	710	Bacteria_Proteobacteria_Alphaproteobacteria_Rickettsiales_Rickettsiaceae_Rickettsia_Candidatus Rickettsia longicornii		PVIL-merged-M01780:105:000000000-CWNB3:1:1116:19980:14265	MK239931.1	100	402	0	0	1	402	257	658	0	743	Bacteria_Proteobacteria_Alphaproteobacteria_Rickettsiales_Anaplasmataceae_Anaplasma_Anaplasma phagocytophilum
NWSE-merged-M01780:105:000000000-CWNB3:1:2114:17072:24289	MT535574.1	95.025	402	20	0	1	402	257	658	3.76e-177	632	Bacteria_Proteobacteria_Alphaproteobacteria_Rickettsiales_Rickettsiaceae_Rickettsia_Candidatus Rickettsia longicornii		PVIL-merged-M01780:105:000000000-CWNB3:1:2103:21616:8136	MK239931.1	100	402	0	0	1	402	257	658	0	743	Bacteria_Proteobacteria_Alphaproteobacteria_Rickettsiales_Anaplasmataceae_Anaplasma_Anaplasma phagocytophilum
NWSE-merged-M01780:105:000000000-CWNB3:1:1109:16346:16009	MT535574.1	99.254	402	3	0	1	402	257	658	0	726	Bacteria_Proteobacteria_Alphaproteobacteria_Rickettsiales_Rickettsiaceae_Rickettsia_Candidatus Rickettsia longicornii		PVIL-merged-M01780:105:000000000-CWNB3:1:2110:3973:16425	MK239931.1	99.502	402	2	0	1	402	257	658	0	732	Bacteria_Proteobacteria_Alphaproteobacteria_Rickettsiales_Anaplasmataceae_Anaplasma_Anaplasma phagocytophilum
NWSE-merged-M01780:105:000000000-CWNB3:1:1109:12372:14186	MT535574.1	96.543	405	14	0	1	405	257	661	0	671	Bacteria_Proteobacteria_Alphaproteobacteria_Rickettsiales_Rickettsiaceae_Rickettsia_Candidatus Rickettsia longicornii		PVIL-merged-M01780:105:000000000-CWNB3:1:2111:16540:13894	MK239931.1	100	402	0	0	1	402	257	658	0	743	Bacteria_Proteobacteria_Alphaproteobacteria_Rickettsiales_Anaplasmataceae_Anaplasma_Anaplasma phagocytophilum
NWSE-merged-M01780:105:000000000-CWNB3:1:1111:12056:23340	MT535574.1	98.756	402	5	0	1	402	257	658	0	715	Bacteria_Proteobacteria_Alphaproteobacteria_Rickettsiales_Rickettsiaceae_Rickettsia_Candidatus Rickettsia longicornii		PVIL-merged-M01780:105:000000000-CWNB3:1:2114:18977:9741	MK239931.1	99.751	402	1	0	1	402	257	658	0	737	Bacteria_Proteobacteria_Alphaproteobacteria_Rickettsiales_Anaplasmataceae_Anaplasma_Anaplasma phagocytophilum
NWSE-merged-M01780:105:000000000-CWNB3:1:1111:27781:13447	MT535574.1	97.015	402	12	0	1	402	257	658	0	676	Bacteria_Proteobacteria_Alphaproteobacteria_Rickettsiales_Rickettsiaceae_Rickettsia_Candidatus Rickettsia longicornii		PVIL-merged-M01780:105:000000000-CWNB3:1:2114:17854:8125	MK239931.1	96.684	392	13	0	1	392	257	648	0	652	Bacteria_Proteobacteria_Alphaproteobacteria_Rickettsiales_Anaplasmataceae_Anaplasma_Anaplasma phagocytophilum
NWSE-merged-M01780:105:000000000-CWNB3:1:1117:27753:6634	MT535574.1	93.797	403	23	2	1	402	257	658	8.19e-169	604	Bacteria_Proteobacteria_Alphaproteobacteria_Rickettsiales_Rickettsiaceae_Rickettsia_Candidatus Rickettsia longicornii		PVIL-merged-M01780:105:000000000-CWNB3:1:2118:10807:5258	MK239931.1	100	402	0	0	1	402	257	658	0	743	Bacteria_Proteobacteria_Alphaproteobacteria_Rickettsiales_Anaplasmataceae_Anaplasma_Anaplasma phagocytophilum
NWSE-merged-M01780:105:000000000-CWNB3:1:2104:14484:10192	MT535574.1	98.01	402	8	0	1	402	257	658	0	699	Bacteria_Proteobacteria_Alphaproteobacteria_Rickettsiales_Rickettsiaceae_Rickettsia_Candidatus Rickettsia longicornii		PVIL-merged-M01780:105:000000000-CWNB3:1:2118:2251:12173	MK239931.1	99.254	402	3	0	1	402	257	658	0	726	Bacteria_Proteobacteria_Alphaproteobacteria_Rickettsiales_Anaplasmataceae_Anaplasma_Anaplasma phagocytophilum
NWSE-merged-M01780:105:000000000-CWNB3:1:1106:23182:17950	MT535574.1	99.254	402	3	0	1	402	257	658	0	726	Bacteria_Proteobacteria_Alphaproteobacteria_Rickettsiales_Rickettsiaceae_Rickettsia_Candidatus Rickettsia longicornii		PVIL-merged-M01780:105:000000000-CWNB3:1:2119:8034:7746	MK239931.1	100	402	0	0	1	402	257	658	0	743	Bacteria_Proteobacteria_Alphaproteobacteria_Rickettsiales_Anaplasmataceae_Anaplasma_Anaplasma phagocytophilum
NWSE-merged-M01780:105:000000000-CWNB3:1:1106:28752:11811	MT535574.1	93.781	402	25	0	1	402	257	658	8.19e-169	604	Bacteria_Proteobacteria_Alphaproteobacteria_Rickettsiales_Rickettsiaceae_Rickettsia_Candidatus Rickettsia longicornii		PVIL-merged-M01780:105:000000000-CWNB3:1:1101:11584:16663	MK239931.1	98.756	402	5	0	1	402	257	658	0	715	Bacteria_Proteobacteria_Alphaproteobacteria_Rickettsiales_Anaplasmataceae_Anaplasma_Anaplasma phagocytophilum
NWSE-merged-M01780:105:000000000-CWNB3:1:1109:26908:19462	MT535574.1	99.751	402	1	0	1	402	257	658	0	737	Bacteria_Proteobacteria_Alphaproteobacteria_Rickettsiales_Rickettsiaceae_Rickettsia_Candidatus Rickettsia longicornii		PVIL-merged-M01780:105:000000000-CWNB3:1:1108:21447:13341	MK239931.1	100	402	0	0	1	402	257	658	0	743	Bacteria_Proteobacteria_Alphaproteobacteria_Rickettsiales_Anaplasmataceae_Anaplasma_Anaplasma phagocytophilum
NWSE-merged-M01780:105:000000000-CWNB3:1:1116:20461:19704	MT535574.1	99.254	402	3	0	1	402	257	658	0	726	Bacteria_Proteobacteria_Alphaproteobacteria_Rickettsiales_Rickettsiaceae_Rickettsia_Candidatus Rickettsia longicornii		PVIL-merged-M01780:105:000000000-CWNB3:1:1107:19105:22700	MK239931.1	100	402	0	0	1	402	257	658	0	743	Bacteria_Proteobacteria_Alphaproteobacteria_Rickettsiales_Anaplasmataceae_Anaplasma_Anaplasma phagocytophilum
NWSE-merged-M01780:105:000000000-CWNB3:1:2102:23110:5247	MT535574.1	97.264	402	11	0	1	402	257	658	0	682	Bacteria_Proteobacteria_Alphaproteobacteria_Rickettsiales_Rickettsiaceae_Rickettsia_Candidatus Rickettsia longicornii		PVIL-merged-M01780:105:000000000-CWNB3:1:1113:14763:8774	MK239931.1	98.756	402	5	0	1	402	257	658	0	715	Bacteria_Proteobacteria_Alphaproteobacteria_Rickettsiales_Anaplasmataceae_Anaplasma_Anaplasma phagocytophilum
NWSE-merged-M01780:105:000000000-CWNB3:1:2106:27166:18921	MT535574.1	99.005	402	4	0	1	402	257	658	0	721	Bacteria_Proteobacteria_Alphaproteobacteria_Rickettsiales_Rickettsiaceae_Rickettsia_Candidatus Rickettsia longicornii		PVIL-merged-M01780:105:000000000-CWNB3:1:1113:7329:12030	MK239931.1	99.254	402	3	0	1	402	257	658	0	726	Bacteria_Proteobacteria_Alphaproteobacteria_Rickettsiales_Anaplasmataceae_Anaplasma_Anaplasma phagocytophilum
NWSE-merged-M01780:105:000000000-CWNB3:1:2107:24894:4407	MT535574.1	98.293	410	7	0	1	410	257	666	0	719	Bacteria_Proteobacteria_Alphaproteobacteria_Rickettsiales_Rickettsiaceae_Rickettsia_Candidatus Rickettsia longicornii		PVIL-merged-M01780:105:000000000-CWNB3:1:1114:24995:11351	MK239931.1	100	402	0	0	1	402	257	658	0	743	Bacteria_Proteobacteria_Alphaproteobacteria_Rickettsiales_Anaplasmataceae_Anaplasma_Anaplasma phagocytophilum
NWSE-merged-M01780:105:000000000-CWNB3:1:2111:13390:22381	MT535574.1	98.01	402	8	0	1	402	257	658	0	699	Bacteria_Proteobacteria_Alphaproteobacteria_Rickettsiales_Rickettsiaceae_Rickettsia_Candidatus Rickettsia longicornii		PVIL-merged-M01780:105:000000000-CWNB3:1:1114:9805:4562	AY969012.1	95.771	402	17	0	1	402	311	712	0	649	Bacteria_Proteobacteria_Alphaproteobacteria_Rickettsiales_Anaplasmataceae_Anaplasma_Anaplasma phagocytophilum
NWSE-merged-M01780:105:000000000-CWNB3:1:1105:7292:17298	MT535574.1	96.447	394	12	2	1	393	257	649	0	649	Bacteria_Proteobacteria_Alphaproteobacteria_Rickettsiales_Rickettsiaceae_Rickettsia_Candidatus Rickettsia longicornii		PVIL-merged-M01780:105:000000000-CWNB3:1:1113:9278:16859	MK239931.1	100	402	0	0	1	402	257	658	0	743	Bacteria_Proteobacteria_Alphaproteobacteria_Rickettsiales_Anaplasmataceae_Anaplasma_Anaplasma phagocytophilum
NWSE-merged-M01780:105:000000000-CWNB3:1:1106:5743:6762	MT535574.1	98.049	410	8	0	1	410	257	666	0	713	Bacteria_Proteobacteria_Alphaproteobacteria_Rickettsiales_Rickettsiaceae_Rickettsia_Candidatus Rickettsia longicornii		PVIL-merged-M01780:105:000000000-CWNB3:1:1117:13643:5967	MK239931.1	100	402	0	0	1	402	257	658	0	743	Bacteria_Proteobacteria_Alphaproteobacteria_Rickettsiales_Anaplasmataceae_Anaplasma_Anaplasma phagocytophilum
NWSE-merged-M01780:105:000000000-CWNB3:1:1119:18589:15450	MT535574.1	98.756	402	5	0	1	402	257	658	0	715	Bacteria_Proteobacteria_Alphaproteobacteria_Rickettsiales_Rickettsiaceae_Rickettsia_Candidatus Rickettsia longicornii		PVIL-merged-M01780:105:000000000-CWNB3:1:1118:14859:8615	MK239931.1	99.751	402	1	0	1	402	257	658	0	737	Bacteria_Proteobacteria_Alphaproteobacteria_Rickettsiales_Anaplasmataceae_Anaplasma_Anaplasma phagocytophilum
NWSE-merged-M01780:105:000000000-CWNB3:1:2102:12280:5250	MT535574.1	98.756	402	5	0	1	402	257	658	0	715	Bacteria_Proteobacteria_Alphaproteobacteria_Rickettsiales_Rickettsiaceae_Rickettsia_Candidatus Rickettsia longicornii		PVIL-merged-M01780:105:000000000-CWNB3:1:2103:14760:2505	MK239931.1	100	402	0	0	1	402	257	658	0	743	Bacteria_Proteobacteria_Alphaproteobacteria_Rickettsiales_Anaplasmataceae_Anaplasma_Anaplasma phagocytophilum
NWSE-merged-M01780:105:000000000-CWNB3:1:2107:9695:13394	MT535574.1	96.552	406	14	0	1	406	257	662	0	673	Bacteria_Proteobacteria_Alphaproteobacteria_Rickettsiales_Rickettsiaceae_Rickettsia_Candidatus Rickettsia longicornii		PVIL-merged-M01780:105:000000000-CWNB3:1:2102:11133:2988	MK239931.1	99.751	402	1	0	1	402	257	658	0	737	Bacteria_Proteobacteria_Alphaproteobacteria_Rickettsiales_Anaplasmataceae_Anaplasma_Anaplasma phagocytophilum
NWSE-merged-M01780:105:000000000-CWNB3:1:2110:21607:8936	MT535574.1	97.311	409	11	0	1	409	257	665	0	695	Bacteria_Proteobacteria_Alphaproteobacteria_Rickettsiales_Rickettsiaceae_Rickettsia_Candidatus Rickettsia longicornii		PVIL-merged-M01780:105:000000000-CWNB3:1:2103:9061:9466	MK239931.1	100	402	0	0	1	402	257	658	0	743	Bacteria_Proteobacteria_Alphaproteobacteria_Rickettsiales_Anaplasmataceae_Anaplasma_Anaplasma phagocytophilum
NWSE-merged-M01780:105:000000000-CWNB3:1:2115:25160:19146	MT535574.1	97.022	403	10	2	1	402	257	658	0	676	Bacteria_Proteobacteria_Alphaproteobacteria_Rickettsiales_Rickettsiaceae_Rickettsia_Candidatus Rickettsia longicornii		PVIL-merged-M01780:105:000000000-CWNB3:1:2108:19647:8917	MK239931.1	99.254	402	3	0	1	402	257	658	0	726	Bacteria_Proteobacteria_Alphaproteobacteria_Rickettsiales_Anaplasmataceae_Anaplasma_Anaplasma phagocytophilum
NWSE-merged-M01780:105:000000000-CWNB3:1:2117:27662:8010	MT535574.1	95.522	402	18	0	1	402	257	658	1.74e-180	643	Bacteria_Proteobacteria_Alphaproteobacteria_Rickettsiales_Rickettsiaceae_Rickettsia_Candidatus Rickettsia longicornii		PVIL-merged-M01780:105:000000000-CWNB3:1:2109:6411:15107	MK239931.1	100	402	0	0	1	402	257	658	0	743	Bacteria_Proteobacteria_Alphaproteobacteria_Rickettsiales_Anaplasmataceae_Anaplasma_Anaplasma phagocytophilum
NWSE-merged-M01780:105:000000000-CWNB3:1:2118:18017:16469	MT535574.1	97.015	402	12	0	1	402	257	658	0	676	Bacteria_Proteobacteria_Alphaproteobacteria_Rickettsiales_Rickettsiaceae_Rickettsia_Candidatus Rickettsia longicornii		PVIL-merged-M01780:105:000000000-CWNB3:1:2112:22902:8631	MK239931.1	100	402	0	0	1	402	257	658	0	743	Bacteria_Proteobacteria_Alphaproteobacteria_Rickettsiales_Anaplasmataceae_Anaplasma_Anaplasma phagocytophilum
NWSE-merged-M01780:105:000000000-CWNB3:1:1105:24167:18198	MT535574.1	97.007	401	12	0	1	401	257	657	0	675	Bacteria_Proteobacteria_Alphaproteobacteria_Rickettsiales_Rickettsiaceae_Rickettsia_Candidatus Rickettsia longicornii		PVIL-merged-M01780:105:000000000-CWNB3:1:2112:14192:17377	MK239931.1	100	402	0	0	1	402	257	658	0	743	Bacteria_Proteobacteria_Alphaproteobacteria_Rickettsiales_Anaplasmataceae_Anaplasma_Anaplasma phagocytophilum
NWSE-merged-M01780:105:000000000-CWNB3:1:1118:14038:13870	MT535574.1	97.995	399	8	0	1	399	257	655	0	693	Bacteria_Proteobacteria_Alphaproteobacteria_Rickettsiales_Rickettsiaceae_Rickettsia_Candidatus Rickettsia longicornii		PVIL-merged-M01780:105:000000000-CWNB3:1:2110:19056:7073	MK239931.1	100	402	0	0	1	402	257	658	0	743	Bacteria_Proteobacteria_Alphaproteobacteria_Rickettsiales_Anaplasmataceae_Anaplasma_Anaplasma phagocytophilum
NWSE-merged-M01780:105:000000000-CWNB3:1:2103:9141:14985	MT535574.1	97.015	402	12	0	1	402	257	658	0	676	Bacteria_Proteobacteria_Alphaproteobacteria_Rickettsiales_Rickettsiaceae_Rickettsia_Candidatus Rickettsia longicornii		PVIL-merged-M01780:105:000000000-CWNB3:1:2114:23820:12738	MK239931.1	99.254	402	3	0	1	402	257	658	0	726	Bacteria_Proteobacteria_Alphaproteobacteria_Rickettsiales_Anaplasmataceae_Anaplasma_Anaplasma phagocytophilum
NWSE-merged-M01780:105:000000000-CWNB3:1:2113:10845:15717	MT535574.1	98.259	402	7	0	1	402	257	658	0	704	Bacteria_Proteobacteria_Alphaproteobacteria_Rickettsiales_Rickettsiaceae_Rickettsia_Candidatus Rickettsia longicornii		PVIL-merged-M01780:105:000000000-CWNB3:1:2115:15294:12472	MK239931.1	99.254	402	3	0	1	402	257	658	0	726	Bacteria_Proteobacteria_Alphaproteobacteria_Rickettsiales_Anaplasmataceae_Anaplasma_Anaplasma phagocytophilum
NWSE-merged-M01780:105:000000000-CWNB3:1:2114:22286:13700	MT535574.1	97.761	402	9	0	1	402	257	658	0	693	Bacteria_Proteobacteria_Alphaproteobacteria_Rickettsiales_Rickettsiaceae_Rickettsia_Candidatus Rickettsia longicornii		PVIL-merged-M01780:105:000000000-CWNB3:1:1103:11035:14576	MK239931.1	99.751	402	1	0	1	402	257	658	0	737	Bacteria_Proteobacteria_Alphaproteobacteria_Rickettsiales_Anaplasmataceae_Anaplasma_Anaplasma phagocytophilum
NWSE-merged-M01780:105:000000000-CWNB3:1:2114:15224:11029	MT535574.1	99.005	402	4	0	1	402	257	658	0	721	Bacteria_Proteobacteria_Alphaproteobacteria_Rickettsiales_Rickettsiaceae_Rickettsia_Candidatus Rickettsia longicornii		PVIL-merged-M01780:105:000000000-CWNB3:1:1103:15760:7468	MK239931.1	100	402	0	0	1	402	257	658	0	743	Bacteria_Proteobacteria_Alphaproteobacteria_Rickettsiales_Anaplasmataceae_Anaplasma_Anaplasma phagocytophilum
NWSE-merged-M01780:105:000000000-CWNB3:1:1111:25531:11260	MT535574.1	98.259	402	7	0	1	402	257	658	0	704	Bacteria_Proteobacteria_Alphaproteobacteria_Rickettsiales_Rickettsiaceae_Rickettsia_Candidatus Rickettsia longicornii		PVIL-merged-M01780:105:000000000-CWNB3:1:1106:12461:9283	AY969012.1	96.269	402	15	0	1	402	311	712	0	660	Bacteria_Proteobacteria_Alphaproteobacteria_Rickettsiales_Anaplasmataceae_Anaplasma_Anaplasma phagocytophilum
NWSE-merged-M01780:105:000000000-CWNB3:1:1116:28055:12253	MT535574.1	98.747	399	5	0	1	399	257	655	0	710	Bacteria_Proteobacteria_Alphaproteobacteria_Rickettsiales_Rickettsiaceae_Rickettsia_Candidatus Rickettsia longicornii		PVIL-merged-M01780:105:000000000-CWNB3:1:1107:20001:11146	MK239931.1	99.751	402	1	0	1	402	257	658	0	737	Bacteria_Proteobacteria_Alphaproteobacteria_Rickettsiales_Anaplasmataceae_Anaplasma_Anaplasma phagocytophilum
NWSE-merged-M01780:105:000000000-CWNB3:1:2107:7302:17831	MT535574.1	97.291	406	11	0	3	408	253	658	0	689	Bacteria_Proteobacteria_Alphaproteobacteria_Rickettsiales_Rickettsiaceae_Rickettsia_Candidatus Rickettsia longicornii		PVIL-merged-M01780:105:000000000-CWNB3:1:1106:22087:19347	MK239931.1	99.254	402	3	0	1	402	257	658	0	726	Bacteria_Proteobacteria_Alphaproteobacteria_Rickettsiales_Anaplasmataceae_Anaplasma_Anaplasma phagocytophilum
NWSE-merged-M01780:105:000000000-CWNB3:1:2111:28700:14036	MT535574.1	98.756	402	5	0	1	402	257	658	0	715	Bacteria_Proteobacteria_Alphaproteobacteria_Rickettsiales_Rickettsiaceae_Rickettsia_Candidatus Rickettsia longicornii		PVIL-merged-M01780:105:000000000-CWNB3:1:1111:13376:6091	MK239931.1	100	402	0	0	1	402	257	658	0	743	Bacteria_Proteobacteria_Alphaproteobacteria_Rickettsiales_Anaplasmataceae_Anaplasma_Anaplasma phagocytophilum
NWSE-merged-M01780:105:000000000-CWNB3:1:2118:16903:8075	MT535574.1	99.254	402	3	0	1	402	257	658	0	726	Bacteria_Proteobacteria_Alphaproteobacteria_Rickettsiales_Rickettsiaceae_Rickettsia_Candidatus Rickettsia longicornii		PVIL-merged-M01780:105:000000000-CWNB3:1:1110:26304:13569	MK239931.1	99.751	402	1	0	1	402	257	658	0	737	Bacteria_Proteobacteria_Alphaproteobacteria_Rickettsiales_Anaplasmataceae_Anaplasma_Anaplasma phagocytophilum
NWSE-merged-M01780:105:000000000-CWNB3:1:1102:26835:6303	MT535574.1	97.761	402	9	0	1	402	257	658	0	693	Bacteria_Proteobacteria_Alphaproteobacteria_Rickettsiales_Rickettsiaceae_Rickettsia_Candidatus Rickettsia longicornii		PVIL-merged-M01780:105:000000000-CWNB3:1:1114:22402:7101	AY969012.1	94.776	402	21	0	1	402	311	712	1.75e-175	627	Bacteria_Proteobacteria_Alphaproteobacteria_Rickettsiales_Anaplasmataceae_Anaplasma_Anaplasma phagocytophilum
NWSE-merged-M01780:105:000000000-CWNB3:1:1103:28359:18213	MT535574.1	99.005	402	4	0	1	402	257	658	0	721	Bacteria_Proteobacteria_Alphaproteobacteria_Rickettsiales_Rickettsiaceae_Rickettsia_Candidatus Rickettsia longicornii		PVIL-merged-M01780:105:000000000-CWNB3:1:1114:21737:16879	MK239931.1	99.751	402	1	0	1	402	257	658	0	737	Bacteria_Proteobacteria_Alphaproteobacteria_Rickettsiales_Anaplasmataceae_Anaplasma_Anaplasma phagocytophilum
NWSE-merged-M01780:105:000000000-CWNB3:1:1103:20289:6723	MT535574.1	98.049	410	8	0	1	410	257	666	0	713	Bacteria_Proteobacteria_Alphaproteobacteria_Rickettsiales_Rickettsiaceae_Rickettsia_Candidatus Rickettsia longicornii		PVIL-merged-M01780:105:000000000-CWNB3:1:1119:25958:17166	MK239931.1	99.751	402	1	0	1	402	257	658	0	737	Bacteria_Proteobacteria_Alphaproteobacteria_Rickettsiales_Anaplasmataceae_Anaplasma_Anaplasma phagocytophilum
NWSE-merged-M01780:105:000000000-CWNB3:1:1105:11978:10929	MT535574.1	99.254	402	3	0	1	402	257	658	0	726	Bacteria_Proteobacteria_Alphaproteobacteria_Rickettsiales_Rickettsiaceae_Rickettsia_Candidatus Rickettsia longicornii		PVIL-merged-M01780:105:000000000-CWNB3:1:1118:14333:10848	MK239931.1	100	407	0	0	1	407	257	663	0	752	Bacteria_Proteobacteria_Alphaproteobacteria_Rickettsiales_Anaplasmataceae_Anaplasma_Anaplasma phagocytophilum
NWSE-merged-M01780:105:000000000-CWNB3:1:2101:7524:5265	MT535574.1	94.763	401	21	0	1	401	257	657	6.28e-175	625	Bacteria_Proteobacteria_Alphaproteobacteria_Rickettsiales_Rickettsiaceae_Rickettsia_Candidatus Rickettsia longicornii		PVIL-merged-M01780:105:000000000-CWNB3:1:2101:28254:9653	MK239931.1	100	402	0	0	1	402	257	658	0	743	Bacteria_Proteobacteria_Alphaproteobacteria_Rickettsiales_Anaplasmataceae_Anaplasma_Anaplasma phagocytophilum
NWSE-merged-M01780:105:000000000-CWNB3:1:2103:12130:22031	MT535574.1	98.756	402	5	0	1	402	257	658	0	715	Bacteria_Proteobacteria_Alphaproteobacteria_Rickettsiales_Rickettsiaceae_Rickettsia_Candidatus Rickettsia longicornii		PVIL-merged-M01780:105:000000000-CWNB3:1:1119:27030:20640	MK239931.1	100	402	0	0	1	402	257	658	0	743	Bacteria_Proteobacteria_Alphaproteobacteria_Rickettsiales_Anaplasmataceae_Anaplasma_Anaplasma phagocytophilum
NWSE-merged-M01780:105:000000000-CWNB3:1:2108:17142:16830	MT535574.1	97.761	402	9	0	1	402	257	658	0	693	Bacteria_Proteobacteria_Alphaproteobacteria_Rickettsiales_Rickettsiaceae_Rickettsia_Candidatus Rickettsia longicornii		PVIL-merged-M01780:105:000000000-CWNB3:1:2102:5503:13761	MK239931.1	99.751	401	1	0	1	401	257	657	0	736	Bacteria_Proteobacteria_Alphaproteobacteria_Rickettsiales_Anaplasmataceae_Anaplasma_Anaplasma phagocytophilum
NWSE-merged-M01780:105:000000000-CWNB3:1:2113:26312:6826	MT535574.1	98.756	402	5	0	1	402	257	658	0	715	Bacteria_Proteobacteria_Alphaproteobacteria_Rickettsiales_Rickettsiaceae_Rickettsia_Candidatus Rickettsia longicornii		PVIL-merged-M01780:105:000000000-CWNB3:1:2103:9870:18435	MK239931.1	99.254	402	3	0	1	402	257	658	0	726	Bacteria_Proteobacteria_Alphaproteobacteria_Rickettsiales_Anaplasmataceae_Anaplasma_Anaplasma phagocytophilum
NWSE-merged-M01780:105:000000000-CWNB3:1:1106:17160:17956	MT535574.1	96.517	402	14	0	1	402	257	658	0	665	Bacteria_Proteobacteria_Alphaproteobacteria_Rickettsiales_Rickettsiaceae_Rickettsia_Candidatus Rickettsia longicornii		PVIL-merged-M01780:105:000000000-CWNB3:1:2104:25364:17513	MN227385.1	97.015	402	12	0	1	402	64	465	0	676	Bacteria_Proteobacteria_Alphaproteobacteria_Rickettsiales_Anaplasmataceae_Anaplasma_Anaplasma phagocytophilum
NWSE-merged-M01780:105:000000000-CWNB3:1:1113:12525:11964	MT535574.1	99.502	402	2	0	1	402	257	658	0	732	Bacteria_Proteobacteria_Alphaproteobacteria_Rickettsiales_Rickettsiaceae_Rickettsia_Candidatus Rickettsia longicornii		PVIL-merged-M01780:105:000000000-CWNB3:1:2107:10406:8655	MK239931.1	100	402	0	0	1	402	257	658	0	743	Bacteria_Proteobacteria_Alphaproteobacteria_Rickettsiales_Anaplasmataceae_Anaplasma_Anaplasma phagocytophilum
NWSE-merged-M01780:105:000000000-CWNB3:1:2101:15123:7031	MT535574.1	98.756	402	5	0	1	402	257	658	0	715	Bacteria_Proteobacteria_Alphaproteobacteria_Rickettsiales_Rickettsiaceae_Rickettsia_Candidatus Rickettsia longicornii		PVIL-merged-M01780:105:000000000-CWNB3:1:2107:14541:16348	MK239931.1	98.259	402	7	0	1	402	257	658	0	704	Bacteria_Proteobacteria_Alphaproteobacteria_Rickettsiales_Anaplasmataceae_Anaplasma_Anaplasma phagocytophilum
NWSE-merged-M01780:105:000000000-CWNB3:1:2117:7857:8362	MT535574.1	99.502	402	2	0	1	402	257	658	0	732	Bacteria_Proteobacteria_Alphaproteobacteria_Rickettsiales_Rickettsiaceae_Rickettsia_Candidatus Rickettsia longicornii		PVIL-merged-M01780:105:000000000-CWNB3:1:2109:20154:24718	MK239931.1	99.751	402	1	0	1	402	257	658	0	737	Bacteria_Proteobacteria_Alphaproteobacteria_Rickettsiales_Anaplasmataceae_Anaplasma_Anaplasma phagocytophilum
NWSE-merged-M01780:105:000000000-CWNB3:1:2118:18889:17352	MT535574.1	98.507	402	6	0	1	402	257	658	0	710	Bacteria_Proteobacteria_Alphaproteobacteria_Rickettsiales_Rickettsiaceae_Rickettsia_Candidatus Rickettsia longicornii		PVIL-merged-M01780:105:000000000-CWNB3:1:2108:13978:15938	MK239931.1	100	402	0	0	1	402	257	658	0	743	Bacteria_Proteobacteria_Alphaproteobacteria_Rickettsiales_Anaplasmataceae_Anaplasma_Anaplasma phagocytophilum
NWSE-merged-M01780:105:000000000-CWNB3:1:1102:25935:8351	MT535574.1	98.049	410	8	0	1	410	257	666	0	713	Bacteria_Proteobacteria_Alphaproteobacteria_Rickettsiales_Rickettsiaceae_Rickettsia_Candidatus Rickettsia longicornii		PVIL-merged-M01780:105:000000000-CWNB3:1:2109:8114:6428	MK239931.1	99.254	402	3	0	1	402	257	658	0	726	Bacteria_Proteobacteria_Alphaproteobacteria_Rickettsiales_Anaplasmataceae_Anaplasma_Anaplasma phagocytophilum
NWSE-merged-M01780:105:000000000-CWNB3:1:1107:10153:8061	MT535574.1	93.902	410	25	0	1	410	257	666	3e-173	619	Bacteria_Proteobacteria_Alphaproteobacteria_Rickettsiales_Rickettsiaceae_Rickettsia_Candidatus Rickettsia longicornii		PVIL-merged-M01780:105:000000000-CWNB3:1:2115:9886:10913	MK239931.1	100	402	0	0	1	402	257	658	0	743	Bacteria_Proteobacteria_Alphaproteobacteria_Rickettsiales_Anaplasmataceae_Anaplasma_Anaplasma phagocytophilum
NWSE-merged-M01780:105:000000000-CWNB3:1:1109:21455:10013	MT535574.1	98.259	402	7	0	1	402	257	658	0	704	Bacteria_Proteobacteria_Alphaproteobacteria_Rickettsiales_Rickettsiaceae_Rickettsia_Candidatus Rickettsia longicornii		PVIL-merged-M01780:105:000000000-CWNB3:1:2118:13843:11476	MK239931.1	100	402	0	0	1	402	257	658	0	743	Bacteria_Proteobacteria_Alphaproteobacteria_Rickettsiales_Anaplasmataceae_Anaplasma_Anaplasma phagocytophilum
NWSE-merged-M01780:105:000000000-CWNB3:1:2105:23889:9794	MT535574.1	99.254	402	3	0	1	402	257	658	0	726	Bacteria_Proteobacteria_Alphaproteobacteria_Rickettsiales_Rickettsiaceae_Rickettsia_Candidatus Rickettsia longicornii		PVIL-merged-M01780:105:000000000-CWNB3:1:1109:26572:13379	MK239931.1	100	402	0	0	1	402	257	658	0	743	Bacteria_Proteobacteria_Alphaproteobacteria_Rickettsiales_Anaplasmataceae_Anaplasma_Anaplasma phagocytophilum
NWSE-merged-M01780:105:000000000-CWNB3:1:2112:15451:9270	MT535574.1	97.264	402	11	0	1	402	257	658	0	682	Bacteria_Proteobacteria_Alphaproteobacteria_Rickettsiales_Rickettsiaceae_Rickettsia_Candidatus Rickettsia longicornii		PVIL-merged-M01780:105:000000000-CWNB3:1:1115:7784:3606	MK239931.1	100	402	0	0	1	402	257	658	0	743	Bacteria_Proteobacteria_Alphaproteobacteria_Rickettsiales_Anaplasmataceae_Anaplasma_Anaplasma phagocytophilum
NWSE-merged-M01780:105:000000000-CWNB3:1:1108:10398:15873	MT535574.1	98.507	402	6	0	1	402	257	658	0	710	Bacteria_Proteobacteria_Alphaproteobacteria_Rickettsiales_Rickettsiaceae_Rickettsia_Candidatus Rickettsia longicornii		PVIL-merged-M01780:105:000000000-CWNB3:1:1118:25592:15715	MK239931.1	100	402	0	0	1	402	257	658	0	743	Bacteria_Proteobacteria_Alphaproteobacteria_Rickettsiales_Anaplasmataceae_Anaplasma_Anaplasma phagocytophilum
NWSE-merged-M01780:105:000000000-CWNB3:1:1109:12109:20091	MT535574.1	98.01	402	8	0	1	402	257	658	0	699	Bacteria_Proteobacteria_Alphaproteobacteria_Rickettsiales_Rickettsiaceae_Rickettsia_Candidatus Rickettsia longicornii		PVIL-merged-M01780:105:000000000-CWNB3:1:1116:26660:19876	MK239931.1	100	402	0	0	1	402	257	658	0	743	Bacteria_Proteobacteria_Alphaproteobacteria_Rickettsiales_Anaplasmataceae_Anaplasma_Anaplasma phagocytophilum
NWSE-merged-M01780:105:000000000-CWNB3:1:1110:6421:23340	MT535574.1	96.269	402	15	0	1	402	257	658	0	660	Bacteria_Proteobacteria_Alphaproteobacteria_Rickettsiales_Rickettsiaceae_Rickettsia_Candidatus Rickettsia longicornii		PVIL-merged-M01780:105:000000000-CWNB3:1:2107:14220:9321	MK239931.1	100	402	0	0	1	402	257	658	0	743	Bacteria_Proteobacteria_Alphaproteobacteria_Rickettsiales_Anaplasmataceae_Anaplasma_Anaplasma phagocytophilum
NWSE-merged-M01780:105:000000000-CWNB3:1:1116:24894:16257	MT535574.1	98.507	402	6	0	1	402	257	658	0	710	Bacteria_Proteobacteria_Alphaproteobacteria_Rickettsiales_Rickettsiaceae_Rickettsia_Candidatus Rickettsia longicornii		PVIL-merged-M01780:105:000000000-CWNB3:1:2106:23875:18748	MK239931.1	100	402	0	0	1	402	257	658	0	743	Bacteria_Proteobacteria_Alphaproteobacteria_Rickettsiales_Anaplasmataceae_Anaplasma_Anaplasma phagocytophilum
NWSE-merged-M01780:105:000000000-CWNB3:1:1113:28884:14593	MT535574.1	98.507	402	6	0	1	402	257	658	0	710	Bacteria_Proteobacteria_Alphaproteobacteria_Rickettsiales_Rickettsiaceae_Rickettsia_Candidatus Rickettsia longicornii		PVIL-merged-M01780:105:000000000-CWNB3:1:2109:23349:20971	MK239931.1	100	402	0	0	1	402	257	658	0	743	Bacteria_Proteobacteria_Alphaproteobacteria_Rickettsiales_Anaplasmataceae_Anaplasma_Anaplasma phagocytophilum
NWSE-merged-M01780:105:000000000-CWNB3:1:2109:28939:10090	MT535574.1	93.627	408	26	0	1	408	257	664	1.81e-170	610	Bacteria_Proteobacteria_Alphaproteobacteria_Rickettsiales_Rickettsiaceae_Rickettsia_Candidatus Rickettsia longicornii		PVIL-merged-M01780:105:000000000-CWNB3:1:2113:4073:6637	AY969012.1	94.776	402	21	0	1	402	311	712	1.75e-175	627	Bacteria_Proteobacteria_Alphaproteobacteria_Rickettsiales_Anaplasmataceae_Anaplasma_Anaplasma phagocytophilum
NWSE-merged-M01780:105:000000000-CWNB3:1:2111:12306:22138	MT535574.1	97.481	397	10	0	1	397	257	653	0	678	Bacteria_Proteobacteria_Alphaproteobacteria_Rickettsiales_Rickettsiaceae_Rickettsia_Candidatus Rickettsia longicornii		PVIL-merged-M01780:105:000000000-CWNB3:1:2113:20821:13668	MK239931.1	99.502	402	2	0	1	402	257	658	0	732	Bacteria_Proteobacteria_Alphaproteobacteria_Rickettsiales_Anaplasmataceae_Anaplasma_Anaplasma phagocytophilum
NWSE-merged-M01780:105:000000000-CWNB3:1:2113:27110:20333	MT535574.1	97.756	401	9	0	2	402	258	658	0	691	Bacteria_Proteobacteria_Alphaproteobacteria_Rickettsiales_Rickettsiaceae_Rickettsia_Candidatus Rickettsia longicornii		PVIL-merged-M01780:105:000000000-CWNB3:1:2118:19686:5682	MK239931.1	99.502	402	2	0	1	402	257	658	0	732	Bacteria_Proteobacteria_Alphaproteobacteria_Rickettsiales_Anaplasmataceae_Anaplasma_Anaplasma phagocytophilum
NWSE-merged-M01780:105:000000000-CWNB3:1:2119:20991:19559	MT535574.1	98.259	402	7	0	1	402	257	658	0	704	Bacteria_Proteobacteria_Alphaproteobacteria_Rickettsiales_Rickettsiaceae_Rickettsia_Candidatus Rickettsia longicornii		PVIL-merged-M01780:105:000000000-CWNB3:1:2117:16189:17134	MK239931.1	100	402	0	0	1	402	257	658	0	743	Bacteria_Proteobacteria_Alphaproteobacteria_Rickettsiales_Anaplasmataceae_Anaplasma_Anaplasma phagocytophilum
NWSE-merged-M01780:105:000000000-CWNB3:1:1112:18949:19870	MT535574.1	97.015	402	12	0	1	402	257	658	0	676	Bacteria_Proteobacteria_Alphaproteobacteria_Rickettsiales_Rickettsiaceae_Rickettsia_Candidatus Rickettsia longicornii		PVIL-merged-M01780:105:000000000-CWNB3:1:1102:27112:19023	MK239931.1	100	402	0	0	1	402	257	658	0	743	Bacteria_Proteobacteria_Alphaproteobacteria_Rickettsiales_Anaplasmataceae_Anaplasma_Anaplasma phagocytophilum
NWSE-merged-M01780:105:000000000-CWNB3:1:1117:14806:17781	MT535574.1	97.264	402	11	0	1	402	257	658	0	682	Bacteria_Proteobacteria_Alphaproteobacteria_Rickettsiales_Rickettsiaceae_Rickettsia_Candidatus Rickettsia longicornii		PVIL-merged-M01780:105:000000000-CWNB3:1:1102:24880:11679	MN227385.1	97.015	402	12	0	1	402	64	465	0	676	Bacteria_Proteobacteria_Alphaproteobacteria_Rickettsiales_Anaplasmataceae_Anaplasma_Anaplasma phagocytophilum
NWSE-merged-M01780:105:000000000-CWNB3:1:1119:23462:20039	MT535574.1	98.259	402	7	0	1	402	257	658	0	704	Bacteria_Proteobacteria_Alphaproteobacteria_Rickettsiales_Rickettsiaceae_Rickettsia_Candidatus Rickettsia longicornii		PVIL-merged-M01780:105:000000000-CWNB3:1:1102:26491:19975	MK239931.1	99.751	402	1	0	1	402	257	658	0	737	Bacteria_Proteobacteria_Alphaproteobacteria_Rickettsiales_Anaplasmataceae_Anaplasma_Anaplasma phagocytophilum
NWSE-merged-M01780:105:000000000-CWNB3:1:2107:14269:11059	MT535574.1	99.502	402	2	0	1	402	257	658	0	732	Bacteria_Proteobacteria_Alphaproteobacteria_Rickettsiales_Rickettsiaceae_Rickettsia_Candidatus Rickettsia longicornii		PVIL-merged-M01780:105:000000000-CWNB3:1:1105:19485:18536	MK239931.1	100	402	0	0	1	402	257	658	0	743	Bacteria_Proteobacteria_Alphaproteobacteria_Rickettsiales_Anaplasmataceae_Anaplasma_Anaplasma phagocytophilum
NWSE-merged-M01780:105:000000000-CWNB3:1:2117:18132:20346	MT535574.1	98.778	409	5	0	1	409	257	665	0	728	Bacteria_Proteobacteria_Alphaproteobacteria_Rickettsiales_Rickettsiaceae_Rickettsia_Candidatus Rickettsia longicornii		PVIL-merged-M01780:105:000000000-CWNB3:1:1109:17400:15015	MK239931.1	98.507	402	6	0	1	402	257	658	0	710	Bacteria_Proteobacteria_Alphaproteobacteria_Rickettsiales_Anaplasmataceae_Anaplasma_Anaplasma phagocytophilum
NWSE-merged-M01780:105:000000000-CWNB3:1:1101:18241:22783	MT535574.1	97.778	405	9	0	1	405	257	661	0	699	Bacteria_Proteobacteria_Alphaproteobacteria_Rickettsiales_Rickettsiaceae_Rickettsia_Candidatus Rickettsia longicornii		PVIL-merged-M01780:105:000000000-CWNB3:1:1110:23265:21669	MK239931.1	100	402	0	0	1	402	257	658	0	743	Bacteria_Proteobacteria_Alphaproteobacteria_Rickettsiales_Anaplasmataceae_Anaplasma_Anaplasma phagocytophilum
NWSE-merged-M01780:105:000000000-CWNB3:1:1105:22776:19299	MT535574.1	99.254	402	3	0	1	402	257	658	0	726	Bacteria_Proteobacteria_Alphaproteobacteria_Rickettsiales_Rickettsiaceae_Rickettsia_Candidatus Rickettsia longicornii		PVIL-merged-M01780:105:000000000-CWNB3:1:1113:23432:17996	MK239931.1	100	402	0	0	1	402	257	658	0	743	Bacteria_Proteobacteria_Alphaproteobacteria_Rickettsiales_Anaplasmataceae_Anaplasma_Anaplasma phagocytophilum
NWSE-merged-M01780:105:000000000-CWNB3:1:1113:9361:11273	MT535574.1	97.264	402	11	0	1	402	257	658	0	682	Bacteria_Proteobacteria_Alphaproteobacteria_Rickettsiales_Rickettsiaceae_Rickettsia_Candidatus Rickettsia longicornii		PVIL-merged-M01780:105:000000000-CWNB3:1:1114:15780:14864	MK239931.1	100	402	0	0	1	402	257	658	0	743	Bacteria_Proteobacteria_Alphaproteobacteria_Rickettsiales_Anaplasmataceae_Anaplasma_Anaplasma phagocytophilum
NWSE-merged-M01780:105:000000000-CWNB3:1:1112:7636:8529	MT535574.1	95.025	402	20	0	1	402	257	658	3.76e-177	632	Bacteria_Proteobacteria_Alphaproteobacteria_Rickettsiales_Rickettsiaceae_Rickettsia_Candidatus Rickettsia longicornii		PVIL-merged-M01780:105:000000000-CWNB3:1:1112:17688:6215	AY969012.1	94.802	404	17	3	1	402	311	712	1.75e-175	627	Bacteria_Proteobacteria_Alphaproteobacteria_Rickettsiales_Anaplasmataceae_Anaplasma_Anaplasma phagocytophilum
NWSE-merged-M01780:105:000000000-CWNB3:1:1113:11931:12307	MT535574.1	95.274	402	19	0	1	402	257	658	8.07e-179	638	Bacteria_Proteobacteria_Alphaproteobacteria_Rickettsiales_Rickettsiaceae_Rickettsia_Candidatus Rickettsia longicornii		PVIL-merged-M01780:105:000000000-CWNB3:1:1118:27240:15593	MK239931.1	99.751	402	1	0	1	402	257	658	0	737	Bacteria_Proteobacteria_Alphaproteobacteria_Rickettsiales_Anaplasmataceae_Anaplasma_Anaplasma phagocytophilum
NWSE-merged-M01780:105:000000000-CWNB3:1:1116:16427:8870	MT535574.1	98.519	405	6	0	1	405	257	661	0	715	Bacteria_Proteobacteria_Alphaproteobacteria_Rickettsiales_Rickettsiaceae_Rickettsia_Candidatus Rickettsia longicornii		PVIL-merged-M01780:105:000000000-CWNB3:1:1115:14645:14938	MK239931.1	100	402	0	0	1	402	257	658	0	743	Bacteria_Proteobacteria_Alphaproteobacteria_Rickettsiales_Anaplasmataceae_Anaplasma_Anaplasma phagocytophilum
NWSE-merged-M01780:105:000000000-CWNB3:1:1119:9025:12682	MT535574.1	97.761	402	9	0	1	402	257	658	0	695	Bacteria_Proteobacteria_Alphaproteobacteria_Rickettsiales_Rickettsiaceae_Rickettsia_Candidatus Rickettsia longicornii		PVIL-merged-M01780:105:000000000-CWNB3:1:1119:28504:9383	MK239931.1	99.751	402	1	0	1	402	257	658	0	737	Bacteria_Proteobacteria_Alphaproteobacteria_Rickettsiales_Anaplasmataceae_Anaplasma_Anaplasma phagocytophilum
NWSE-merged-M01780:105:000000000-CWNB3:1:1119:13047:17564	MT535574.1	95.707	396	17	0	1	396	257	652	8.07e-179	638	Bacteria_Proteobacteria_Alphaproteobacteria_Rickettsiales_Rickettsiaceae_Rickettsia_Candidatus Rickettsia longicornii		PVIL-merged-M01780:105:000000000-CWNB3:1:2102:6925:11339	MK239931.1	100	402	0	0	1	402	257	658	0	743	Bacteria_Proteobacteria_Alphaproteobacteria_Rickettsiales_Anaplasmataceae_Anaplasma_Anaplasma phagocytophilum
NWSE-merged-M01780:105:000000000-CWNB3:1:2111:28416:16772	MT535574.1	98.507	402	6	0	1	402	257	658	0	710	Bacteria_Proteobacteria_Alphaproteobacteria_Rickettsiales_Rickettsiaceae_Rickettsia_Candidatus Rickettsia longicornii		PVIL-merged-M01780:105:000000000-CWNB3:1:2106:11952:6386	MK239931.1	100	402	0	0	1	402	257	658	0	743	Bacteria_Proteobacteria_Alphaproteobacteria_Rickettsiales_Anaplasmataceae_Anaplasma_Anaplasma phagocytophilum
NWSE-merged-M01780:105:000000000-CWNB3:1:1108:23401:11281	MT535574.1	97.264	402	11	0	1	402	257	658	0	682	Bacteria_Proteobacteria_Alphaproteobacteria_Rickettsiales_Rickettsiaceae_Rickettsia_Candidatus Rickettsia longicornii		PVIL-merged-M01780:105:000000000-CWNB3:1:2105:13628:15103	MK239931.1	100	402	0	0	1	402	257	658	0	743	Bacteria_Proteobacteria_Alphaproteobacteria_Rickettsiales_Anaplasmataceae_Anaplasma_Anaplasma phagocytophilum
NWSE-merged-M01780:105:000000000-CWNB3:1:1118:24240:17892	MT535574.1	99.502	402	2	0	1	402	257	658	0	732	Bacteria_Proteobacteria_Alphaproteobacteria_Rickettsiales_Rickettsiaceae_Rickettsia_Candidatus Rickettsia longicornii		PVIL-merged-M01780:105:000000000-CWNB3:1:2106:25745:12856	MK239931.1	99.502	402	2	0	1	402	257	658	0	732	Bacteria_Proteobacteria_Alphaproteobacteria_Rickettsiales_Anaplasmataceae_Anaplasma_Anaplasma phagocytophilum
NWSE-merged-M01780:105:000000000-CWNB3:1:2106:21839:2552	MT535574.1	98.522	406	6	0	1	406	257	662	0	717	Bacteria_Proteobacteria_Alphaproteobacteria_Rickettsiales_Rickettsiaceae_Rickettsia_Candidatus Rickettsia longicornii		PVIL-merged-M01780:105:000000000-CWNB3:1:2111:12243:5941	MK239931.1	99.005	402	4	0	1	402	257	658	0	721	Bacteria_Proteobacteria_Alphaproteobacteria_Rickettsiales_Anaplasmataceae_Anaplasma_Anaplasma phagocytophilum
NWSE-merged-M01780:105:000000000-CWNB3:1:1105:14983:10441	MT535574.1	96.517	402	14	0	1	402	257	658	0	665	Bacteria_Proteobacteria_Alphaproteobacteria_Rickettsiales_Rickettsiaceae_Rickettsia_Candidatus Rickettsia longicornii		PVIL-merged-M01780:105:000000000-CWNB3:1:2110:13138:10519	MK239931.1	100	402	0	0	1	402	257	658	0	743	Bacteria_Proteobacteria_Alphaproteobacteria_Rickettsiales_Anaplasmataceae_Anaplasma_Anaplasma phagocytophilum
NWSE-merged-M01780:105:000000000-CWNB3:1:1112:9976:13593	MT535574.1	98.756	402	5	0	1	402	257	658	0	715	Bacteria_Proteobacteria_Alphaproteobacteria_Rickettsiales_Rickettsiaceae_Rickettsia_Candidatus Rickettsia longicornii		PVIL-merged-M01780:105:000000000-CWNB3:1:2118:16056:13926	MK239931.1	99.254	402	3	0	1	402	257	658	0	726	Bacteria_Proteobacteria_Alphaproteobacteria_Rickettsiales_Anaplasmataceae_Anaplasma_Anaplasma phagocytophilum
NWSE-merged-M01780:105:000000000-CWNB3:1:1111:12720:15785	MT535574.1	99.502	402	2	0	1	402	257	658	0	732	Bacteria_Proteobacteria_Alphaproteobacteria_Rickettsiales_Rickettsiaceae_Rickettsia_Candidatus Rickettsia longicornii		PVIL-merged-M01780:105:000000000-CWNB3:1:1104:21017:5428	MK239931.1	98.756	402	5	0	1	402	257	658	0	715	Bacteria_Proteobacteria_Alphaproteobacteria_Rickettsiales_Anaplasmataceae_Anaplasma_Anaplasma phagocytophilum
NWSE-merged-M01780:105:000000000-CWNB3:1:1114:12606:19145	MT535574.1	97.772	404	9	0	1	404	257	660	0	697	Bacteria_Proteobacteria_Alphaproteobacteria_Rickettsiales_Rickettsiaceae_Rickettsia_Candidatus Rickettsia longicornii		PVIL-merged-M01780:105:000000000-CWNB3:1:1101:13034:6784	AY969012.1	97.015	402	12	0	1	402	311	712	0	676	Bacteria_Proteobacteria_Alphaproteobacteria_Rickettsiales_Anaplasmataceae_Anaplasma_Anaplasma phagocytophilum
NWSE-merged-M01780:105:000000000-CWNB3:1:1119:8205:16832	MT535574.1	99.751	402	1	0	1	402	257	658	0	737	Bacteria_Proteobacteria_Alphaproteobacteria_Rickettsiales_Rickettsiaceae_Rickettsia_Candidatus Rickettsia longicornii		PVIL-merged-M01780:105:000000000-CWNB3:1:1108:12791:15516	MK239931.1	100	402	0	0	1	402	257	658	0	743	Bacteria_Proteobacteria_Alphaproteobacteria_Rickettsiales_Anaplasmataceae_Anaplasma_Anaplasma phagocytophilum
NWSE-merged-M01780:105:000000000-CWNB3:1:2110:23135:17023	MT535574.1	99.005	402	4	0	1	402	257	658	0	721	Bacteria_Proteobacteria_Alphaproteobacteria_Rickettsiales_Rickettsiaceae_Rickettsia_Candidatus Rickettsia longicornii		PVIL-merged-M01780:105:000000000-CWNB3:1:1109:13114:21408	MK239931.1	100	402	0	0	1	402	257	658	0	743	Bacteria_Proteobacteria_Alphaproteobacteria_Rickettsiales_Anaplasmataceae_Anaplasma_Anaplasma phagocytophilum
NWSE-merged-M01780:105:000000000-CWNB3:1:2112:19540:17884	MT535574.1	97.761	402	9	0	1	402	257	658	0	693	Bacteria_Proteobacteria_Alphaproteobacteria_Rickettsiales_Rickettsiaceae_Rickettsia_Candidatus Rickettsia longicornii		PVIL-merged-M01780:105:000000000-CWNB3:1:1112:25674:9402	MK239931.1	99.254	402	3	0	1	402	257	658	0	726	Bacteria_Proteobacteria_Alphaproteobacteria_Rickettsiales_Anaplasmataceae_Anaplasma_Anaplasma phagocytophilum
NWSE-merged-M01780:105:000000000-CWNB3:1:2115:20394:18063	MT535574.1	98.254	401	7	0	2	402	258	658	0	702	Bacteria_Proteobacteria_Alphaproteobacteria_Rickettsiales_Rickettsiaceae_Rickettsia_Candidatus Rickettsia longicornii		PVIL-merged-M01780:105:000000000-CWNB3:1:1112:22923:18405	MK239931.1	100	402	0	0	1	402	257	658	0	743	Bacteria_Proteobacteria_Alphaproteobacteria_Rickettsiales_Anaplasmataceae_Anaplasma_Anaplasma phagocytophilum
NWSE-merged-M01780:105:000000000-CWNB3:1:2115:13607:10031	MT535574.1	99.254	402	3	0	1	402	257	658	0	726	Bacteria_Proteobacteria_Alphaproteobacteria_Rickettsiales_Rickettsiaceae_Rickettsia_Candidatus Rickettsia longicornii		PVIL-merged-M01780:105:000000000-CWNB3:1:1113:24626:4171	MK239931.1	97.015	402	12	0	1	402	257	658	0	676	Bacteria_Proteobacteria_Alphaproteobacteria_Rickettsiales_Anaplasmataceae_Anaplasma_Anaplasma phagocytophilum
NWSE-merged-M01780:105:000000000-CWNB3:1:1106:19733:3244	MT535574.1	97.761	402	9	0	1	402	257	658	0	693	Bacteria_Proteobacteria_Alphaproteobacteria_Rickettsiales_Rickettsiaceae_Rickettsia_Candidatus Rickettsia longicornii		PVIL-merged-M01780:105:000000000-CWNB3:1:1112:14931:24503	MK239931.1	99.751	402	1	0	1	402	257	658	0	737	Bacteria_Proteobacteria_Alphaproteobacteria_Rickettsiales_Anaplasmataceae_Anaplasma_Anaplasma phagocytophilum
NWSE-merged-M01780:105:000000000-CWNB3:1:1104:9713:16388	MT535574.1	95.274	402	19	0	1	402	257	658	8.07e-179	638	Bacteria_Proteobacteria_Alphaproteobacteria_Rickettsiales_Rickettsiaceae_Rickettsia_Candidatus Rickettsia longicornii		PVIL-merged-M01780:105:000000000-CWNB3:1:1119:11166:7515	KF569909.1	94.059	404	20	3	1	402	258	659	1.76e-170	610	Bacteria_Proteobacteria_Alphaproteobacteria_Rickettsiales_Anaplasmataceae_Anaplasma_Anaplasma phagocytophilum
NWSE-merged-M01780:105:000000000-CWNB3:1:1114:8241:9703	MT535574.1	94.581	406	22	0	1	406	257	662	4.92e-176	628	Bacteria_Proteobacteria_Alphaproteobacteria_Rickettsiales_Rickettsiaceae_Rickettsia_Candidatus Rickettsia longicornii		PVIL-merged-M01780:105:000000000-CWNB3:1:1118:11761:20054	MK239931.1	99.751	402	1	0	1	402	257	658	0	737	Bacteria_Proteobacteria_Alphaproteobacteria_Rickettsiales_Anaplasmataceae_Anaplasma_Anaplasma phagocytophilum
NWSE-merged-M01780:105:000000000-CWNB3:1:1116:24004:19730	MT535574.1	98.507	402	6	0	1	402	257	658	0	710	Bacteria_Proteobacteria_Alphaproteobacteria_Rickettsiales_Rickettsiaceae_Rickettsia_Candidatus Rickettsia longicornii		PVIL-merged-M01780:105:000000000-CWNB3:1:2105:22043:13842	MK239931.1	100	402	0	0	1	402	257	658	0	743	Bacteria_Proteobacteria_Alphaproteobacteria_Rickettsiales_Anaplasmataceae_Anaplasma_Anaplasma phagocytophilum
NWSE-merged-M01780:105:000000000-CWNB3:1:1118:8748:16066	MT535574.1	99.005	402	4	0	1	402	257	658	0	721	Bacteria_Proteobacteria_Alphaproteobacteria_Rickettsiales_Rickettsiaceae_Rickettsia_Candidatus Rickettsia longicornii		PVIL-merged-M01780:105:000000000-CWNB3:1:2106:20562:18389	MK239931.1	100	402	0	0	1	402	257	658	0	743	Bacteria_Proteobacteria_Alphaproteobacteria_Rickettsiales_Anaplasmataceae_Anaplasma_Anaplasma phagocytophilum
NWSE-merged-M01780:105:000000000-CWNB3:1:2104:19281:10875	MT535574.1	99.005	402	4	0	1	402	257	658	0	721	Bacteria_Proteobacteria_Alphaproteobacteria_Rickettsiales_Rickettsiaceae_Rickettsia_Candidatus Rickettsia longicornii		PVIL-merged-M01780:105:000000000-CWNB3:1:2108:17987:14006	MK239931.1	99.751	402	1	0	1	402	257	658	0	737	Bacteria_Proteobacteria_Alphaproteobacteria_Rickettsiales_Anaplasmataceae_Anaplasma_Anaplasma phagocytophilum
NWSE-merged-M01780:105:000000000-CWNB3:1:2112:11199:13866	MT535574.1	96.758	401	13	0	1	401	257	657	0	669	Bacteria_Proteobacteria_Alphaproteobacteria_Rickettsiales_Rickettsiaceae_Rickettsia_Candidatus Rickettsia longicornii		PVIL-merged-M01780:105:000000000-CWNB3:1:2110:14694:12711	MK239931.1	99.751	402	1	0	1	402	257	658	0	737	Bacteria_Proteobacteria_Alphaproteobacteria_Rickettsiales_Anaplasmataceae_Anaplasma_Anaplasma phagocytophilum
NWSE-merged-M01780:105:000000000-CWNB3:1:1105:22741:5204	MT535574.1	99.005	402	4	0	1	402	257	658	0	721	Bacteria_Proteobacteria_Alphaproteobacteria_Rickettsiales_Rickettsiaceae_Rickettsia_Candidatus Rickettsia longicornii		PVIL-merged-M01780:105:000000000-CWNB3:1:2112:16708:13782	MK239931.1	99.751	402	1	0	1	402	257	658	0	737	Bacteria_Proteobacteria_Alphaproteobacteria_Rickettsiales_Anaplasmataceae_Anaplasma_Anaplasma phagocytophilum
NWSE-merged-M01780:105:000000000-CWNB3:1:1107:16645:11199	MT535574.1	97	400	12	0	1	400	257	656	0	673	Bacteria_Proteobacteria_Alphaproteobacteria_Rickettsiales_Rickettsiaceae_Rickettsia_Candidatus Rickettsia longicornii		PVIL-merged-M01780:105:000000000-CWNB3:1:2112:18246:15060	MK239931.1	100	402	0	0	1	402	257	658	0	743	Bacteria_Proteobacteria_Alphaproteobacteria_Rickettsiales_Anaplasmataceae_Anaplasma_Anaplasma phagocytophilum
NWSE-merged-M01780:105:000000000-CWNB3:1:2112:21556:14751	MT535574.1	99.005	402	4	0	1	402	257	658	0	721	Bacteria_Proteobacteria_Alphaproteobacteria_Rickettsiales_Rickettsiaceae_Rickettsia_Candidatus Rickettsia longicornii		PVIL-merged-M01780:105:000000000-CWNB3:1:2114:28992:12104	MK239931.1	100	402	0	0	1	402	257	658	0	743	Bacteria_Proteobacteria_Alphaproteobacteria_Rickettsiales_Anaplasmataceae_Anaplasma_Anaplasma phagocytophilum
NWSE-merged-M01780:105:000000000-CWNB3:1:1101:15114:10544	MT535574.1	96.491	399	14	0	1	399	257	655	0	660	Bacteria_Proteobacteria_Alphaproteobacteria_Rickettsiales_Rickettsiaceae_Rickettsia_Candidatus Rickettsia longicornii		PVIL-merged-M01780:105:000000000-CWNB3:1:2116:12358:12247	MK239931.1	100	402	0	0	1	402	257	658	0	743	Bacteria_Proteobacteria_Alphaproteobacteria_Rickettsiales_Anaplasmataceae_Anaplasma_Anaplasma phagocytophilum
NWSE-merged-M01780:105:000000000-CWNB3:1:1104:21958:19539	MT535574.1	97.291	406	11	0	1	406	257	662	0	689	Bacteria_Proteobacteria_Alphaproteobacteria_Rickettsiales_Rickettsiaceae_Rickettsia_Candidatus Rickettsia longicornii		PVIL-merged-M01780:105:000000000-CWNB3:1:2117:9773:10177	MK239931.1	100	402	0	0	1	402	257	658	0	743	Bacteria_Proteobacteria_Alphaproteobacteria_Rickettsiales_Anaplasmataceae_Anaplasma_Anaplasma phagocytophilum
NWSE-merged-M01780:105:000000000-CWNB3:1:1118:8893:12401	MT535574.1	99.751	402	1	0	1	402	257	658	0	737	Bacteria_Proteobacteria_Alphaproteobacteria_Rickettsiales_Rickettsiaceae_Rickettsia_Candidatus Rickettsia longicornii		PVIL-merged-M01780:105:000000000-CWNB3:1:2119:17633:14000	MK239931.1	100	402	0	0	1	402	257	658	0	743	Bacteria_Proteobacteria_Alphaproteobacteria_Rickettsiales_Anaplasmataceae_Anaplasma_Anaplasma phagocytophilum
NWSE-merged-M01780:105:000000000-CWNB3:1:2111:24757:17691	MT535574.1	98.259	402	7	0	1	402	257	658	0	704	Bacteria_Proteobacteria_Alphaproteobacteria_Rickettsiales_Rickettsiaceae_Rickettsia_Candidatus Rickettsia longicornii		PVIL-merged-M01780:105:000000000-CWNB3:1:1104:5670:9792	MN227385.1	97.015	402	12	0	1	402	64	465	0	676	Bacteria_Proteobacteria_Alphaproteobacteria_Rickettsiales_Anaplasmataceae_Anaplasma_Anaplasma phagocytophilum
NWSE-merged-M01780:105:000000000-CWNB3:1:2117:24349:19002	MT535574.1	98.756	402	5	0	1	402	257	658	0	715	Bacteria_Proteobacteria_Alphaproteobacteria_Rickettsiales_Rickettsiaceae_Rickettsia_Candidatus Rickettsia longicornii		PVIL-merged-M01780:105:000000000-CWNB3:1:1106:6109:16216	MK239931.1	99.751	402	1	0	1	402	257	658	0	737	Bacteria_Proteobacteria_Alphaproteobacteria_Rickettsiales_Anaplasmataceae_Anaplasma_Anaplasma phagocytophilum
NWSE-merged-M01780:105:000000000-CWNB3:1:2116:25543:6119	MT535574.1	99.751	402	1	0	1	402	257	658	0	737	Bacteria_Proteobacteria_Alphaproteobacteria_Rickettsiales_Rickettsiaceae_Rickettsia_Candidatus Rickettsia longicornii		PVIL-merged-M01780:105:000000000-CWNB3:1:1104:20299:14568	MK239931.1	100	402	0	0	1	402	257	658	0	743	Bacteria_Proteobacteria_Alphaproteobacteria_Rickettsiales_Anaplasmataceae_Anaplasma_Anaplasma phagocytophilum
NWSE-merged-M01780:105:000000000-CWNB3:1:2117:4209:15854	MT535574.1	97.264	402	11	0	1	402	257	658	0	682	Bacteria_Proteobacteria_Alphaproteobacteria_Rickettsiales_Rickettsiaceae_Rickettsia_Candidatus Rickettsia longicornii		PVIL-merged-M01780:105:000000000-CWNB3:1:1105:8905:19624	MK239931.1	99.751	402	1	0	1	402	257	658	0	737	Bacteria_Proteobacteria_Alphaproteobacteria_Rickettsiales_Anaplasmataceae_Anaplasma_Anaplasma phagocytophilum
NWSE-merged-M01780:105:000000000-CWNB3:1:1106:20130:23590	MT535574.1	99.254	402	3	0	1	402	257	658	0	726	Bacteria_Proteobacteria_Alphaproteobacteria_Rickettsiales_Rickettsiaceae_Rickettsia_Candidatus Rickettsia longicornii		PVIL-merged-M01780:105:000000000-CWNB3:1:1109:25048:19094	MK239931.1	100	402	0	0	1	402	257	658	0	743	Bacteria_Proteobacteria_Alphaproteobacteria_Rickettsiales_Anaplasmataceae_Anaplasma_Anaplasma phagocytophilum
NWSE-merged-M01780:105:000000000-CWNB3:1:1118:10821:13475	MT535574.1	99.254	402	3	0	1	402	257	658	0	726	Bacteria_Proteobacteria_Alphaproteobacteria_Rickettsiales_Rickettsiaceae_Rickettsia_Candidatus Rickettsia longicornii		PVIL-merged-M01780:105:000000000-CWNB3:1:1112:26172:19557	MN227385.1	100	402	0	0	1	402	64	465	0	743	Bacteria_Proteobacteria_Alphaproteobacteria_Rickettsiales_Anaplasmataceae_Anaplasma_Anaplasma phagocytophilum
NWSE-merged-M01780:105:000000000-CWNB3:1:2114:7551:12628	MT535574.1	99.751	402	1	0	1	402	257	658	0	737	Bacteria_Proteobacteria_Alphaproteobacteria_Rickettsiales_Rickettsiaceae_Rickettsia_Candidatus Rickettsia longicornii		PVIL-merged-M01780:105:000000000-CWNB3:1:1113:10961:11068	MK239931.1	99.254	402	3	0	1	402	257	658	0	726	Bacteria_Proteobacteria_Alphaproteobacteria_Rickettsiales_Anaplasmataceae_Anaplasma_Anaplasma phagocytophilum
NWSE-merged-M01780:105:000000000-CWNB3:1:1104:12605:7891	MT535574.1	99.254	402	3	0	1	402	257	658	0	726	Bacteria_Proteobacteria_Alphaproteobacteria_Rickettsiales_Rickettsiaceae_Rickettsia_Candidatus Rickettsia longicornii		PVIL-merged-M01780:105:000000000-CWNB3:1:1113:19640:15823	MK239931.1	100	402	0	0	1	402	257	658	0	743	Bacteria_Proteobacteria_Alphaproteobacteria_Rickettsiales_Anaplasmataceae_Anaplasma_Anaplasma phagocytophilum
NWSE-merged-M01780:105:000000000-CWNB3:1:1106:23268:17313	MT535574.1	98.507	402	6	0	1	402	257	658	0	710	Bacteria_Proteobacteria_Alphaproteobacteria_Rickettsiales_Rickettsiaceae_Rickettsia_Candidatus Rickettsia longicornii		PVIL-merged-M01780:105:000000000-CWNB3:1:1117:28083:11238	MK239931.1	100	402	0	0	1	402	257	658	0	743	Bacteria_Proteobacteria_Alphaproteobacteria_Rickettsiales_Anaplasmataceae_Anaplasma_Anaplasma phagocytophilum
NWSE-merged-M01780:105:000000000-CWNB3:1:1108:13282:16128	MT535574.1	97.073	410	12	0	1	410	257	666	0	691	Bacteria_Proteobacteria_Alphaproteobacteria_Rickettsiales_Rickettsiaceae_Rickettsia_Candidatus Rickettsia longicornii		PVIL-merged-M01780:105:000000000-CWNB3:1:1119:10057:16564	MK239931.1	100	402	0	0	1	402	257	658	0	743	Bacteria_Proteobacteria_Alphaproteobacteria_Rickettsiales_Anaplasmataceae_Anaplasma_Anaplasma phagocytophilum
NWSE-merged-M01780:105:000000000-CWNB3:1:1105:13114:19696	MT535574.1	97.311	409	11	0	1	409	257	665	0	695	Bacteria_Proteobacteria_Alphaproteobacteria_Rickettsiales_Rickettsiaceae_Rickettsia_Candidatus Rickettsia longicornii		PVIL-merged-M01780:105:000000000-CWNB3:1:1118:15309:19772	MK239931.1	100	402	0	0	1	402	257	658	0	743	Bacteria_Proteobacteria_Alphaproteobacteria_Rickettsiales_Anaplasmataceae_Anaplasma_Anaplasma phagocytophilum
NWSE-merged-M01780:105:000000000-CWNB3:1:1112:27983:14341	MT535574.1	97.25	400	11	0	1	400	257	656	0	678	Bacteria_Proteobacteria_Alphaproteobacteria_Rickettsiales_Rickettsiaceae_Rickettsia_Candidatus Rickettsia longicornii		PVIL-merged-M01780:105:000000000-CWNB3:1:2101:20903:15356	MK239931.1	99.751	402	0	1	1	401	257	658	0	736	Bacteria_Proteobacteria_Alphaproteobacteria_Rickettsiales_Anaplasmataceae_Anaplasma_Anaplasma phagocytophilum
NWSE-merged-M01780:105:000000000-CWNB3:1:1112:24502:6699	MT535574.1	98.768	406	5	0	1	406	257	662	0	723	Bacteria_Proteobacteria_Alphaproteobacteria_Rickettsiales_Rickettsiaceae_Rickettsia_Candidatus Rickettsia longicornii		PVIL-merged-M01780:105:000000000-CWNB3:1:2104:16032:9454	MK239931.1	100	402	0	0	1	402	257	658	0	743	Bacteria_Proteobacteria_Alphaproteobacteria_Rickettsiales_Anaplasmataceae_Anaplasma_Anaplasma phagocytophilum
NWSE-merged-M01780:105:000000000-CWNB3:1:1118:22166:12204	MT535574.1	98.259	402	7	0	1	402	257	658	0	704	Bacteria_Proteobacteria_Alphaproteobacteria_Rickettsiales_Rickettsiaceae_Rickettsia_Candidatus Rickettsia longicornii		PVIL-merged-M01780:105:000000000-CWNB3:1:2112:3348:10451	MK239931.1	100	402	0	0	1	402	257	658	0	743	Bacteria_Proteobacteria_Alphaproteobacteria_Rickettsiales_Anaplasmataceae_Anaplasma_Anaplasma phagocytophilum
NWSE-merged-M01780:105:000000000-CWNB3:1:2104:21321:21841	MT535574.1	99.005	402	4	0	1	402	257	658	0	721	Bacteria_Proteobacteria_Alphaproteobacteria_Rickettsiales_Rickettsiaceae_Rickettsia_Candidatus Rickettsia longicornii		PVIL-merged-M01780:105:000000000-CWNB3:1:2113:17731:4075	MK239931.1	99.005	402	4	0	1	402	257	658	0	721	Bacteria_Proteobacteria_Alphaproteobacteria_Rickettsiales_Anaplasmataceae_Anaplasma_Anaplasma phagocytophilum
NWSE-merged-M01780:105:000000000-CWNB3:1:2109:13217:12340	MT535574.1	99.751	402	1	0	1	402	257	658	0	737	Bacteria_Proteobacteria_Alphaproteobacteria_Rickettsiales_Rickettsiaceae_Rickettsia_Candidatus Rickettsia longicornii		PVIL-merged-M01780:105:000000000-CWNB3:1:2113:21641:21128	MK239931.1	99.751	402	1	0	1	402	257	658	0	737	Bacteria_Proteobacteria_Alphaproteobacteria_Rickettsiales_Anaplasmataceae_Anaplasma_Anaplasma phagocytophilum
NWSE-merged-M01780:105:000000000-CWNB3:1:1108:11825:10207	MT535574.1	98.756	402	5	0	1	402	257	658	0	715	Bacteria_Proteobacteria_Alphaproteobacteria_Rickettsiales_Rickettsiaceae_Rickettsia_Candidatus Rickettsia longicornii		PVIL-merged-M01780:105:000000000-CWNB3:1:2111:15386:5662	MK239931.1	100	402	0	0	1	402	257	658	0	743	Bacteria_Proteobacteria_Alphaproteobacteria_Rickettsiales_Anaplasmataceae_Anaplasma_Anaplasma phagocytophilum
NWSE-merged-M01780:105:000000000-CWNB3:1:1110:19309:20263	MT535574.1	98.507	402	6	0	1	402	257	658	0	710	Bacteria_Proteobacteria_Alphaproteobacteria_Rickettsiales_Rickettsiaceae_Rickettsia_Candidatus Rickettsia longicornii		PVIL-merged-M01780:105:000000000-CWNB3:1:2115:14772:12086	MK239931.1	100	402	0	0	1	402	257	658	0	743	Bacteria_Proteobacteria_Alphaproteobacteria_Rickettsiales_Anaplasmataceae_Anaplasma_Anaplasma phagocytophilum
NWSE-merged-M01780:105:000000000-CWNB3:1:1110:7912:19110	MT535574.1	99.502	402	2	0	1	402	257	658	0	732	Bacteria_Proteobacteria_Alphaproteobacteria_Rickettsiales_Rickettsiaceae_Rickettsia_Candidatus Rickettsia longicornii		PVIL-merged-M01780:105:000000000-CWNB3:1:2114:23986:16272	MK239931.1	99.751	402	1	0	1	402	257	658	0	737	Bacteria_Proteobacteria_Alphaproteobacteria_Rickettsiales_Anaplasmataceae_Anaplasma_Anaplasma phagocytophilum
NWSE-merged-M01780:105:000000000-CWNB3:1:1108:24358:21430	MT535574.1	99.751	402	1	0	1	402	257	658	0	737	Bacteria_Proteobacteria_Alphaproteobacteria_Rickettsiales_Rickettsiaceae_Rickettsia_Candidatus Rickettsia longicornii		PVIL-merged-M01780:105:000000000-CWNB3:1:2118:8649:14329	MK239931.1	100	402	0	0	1	402	257	658	0	743	Bacteria_Proteobacteria_Alphaproteobacteria_Rickettsiales_Anaplasmataceae_Anaplasma_Anaplasma phagocytophilum
NWSE-merged-M01780:105:000000000-CWNB3:1:1116:26171:4847	MT535574.1	98.01	402	8	0	1	402	257	658	0	699	Bacteria_Proteobacteria_Alphaproteobacteria_Rickettsiales_Rickettsiaceae_Rickettsia_Candidatus Rickettsia longicornii		PVIL-merged-M01780:105:000000000-CWNB3:1:2119:8178:4601	MK239931.1	99.751	402	1	0	1	402	257	658	0	737	Bacteria_Proteobacteria_Alphaproteobacteria_Rickettsiales_Anaplasmataceae_Anaplasma_Anaplasma phagocytophilum
NWSE-merged-M01780:105:000000000-CWNB3:1:2106:9072:11480	MT535574.1	96.517	402	14	0	1	402	257	658	0	665	Bacteria_Proteobacteria_Alphaproteobacteria_Rickettsiales_Rickettsiaceae_Rickettsia_Candidatus Rickettsia longicornii		PVIL-merged-M01780:105:000000000-CWNB3:1:1103:7890:1758	MK239931.1	98.756	402	5	0	1	402	257	658	0	715	Bacteria_Proteobacteria_Alphaproteobacteria_Rickettsiales_Anaplasmataceae_Anaplasma_Anaplasma phagocytophilum
NWSE-merged-M01780:105:000000000-CWNB3:1:1101:11742:13999	MT535574.1	99.754	406	1	0	3	408	253	658	0	745	Bacteria_Proteobacteria_Alphaproteobacteria_Rickettsiales_Rickettsiaceae_Rickettsia_Candidatus Rickettsia longicornii		PVIL-merged-M01780:105:000000000-CWNB3:1:1113:8793:8797	MK239931.1	98.259	402	7	0	1	402	257	658	0	704	Bacteria_Proteobacteria_Alphaproteobacteria_Rickettsiales_Anaplasmataceae_Anaplasma_Anaplasma phagocytophilum
NWSE-merged-M01780:105:000000000-CWNB3:1:1105:8635:13341	MT535574.1	97.015	402	12	0	1	402	257	658	0	676	Bacteria_Proteobacteria_Alphaproteobacteria_Rickettsiales_Rickettsiaceae_Rickettsia_Candidatus Rickettsia longicornii		PVIL-merged-M01780:105:000000000-CWNB3:1:1113:22444:5656	MK239931.1	100	402	0	0	1	402	257	658	0	743	Bacteria_Proteobacteria_Alphaproteobacteria_Rickettsiales_Anaplasmataceae_Anaplasma_Anaplasma phagocytophilum
NWSE-merged-M01780:105:000000000-CWNB3:1:1114:19756:12817	MT535574.1	99.502	402	2	0	1	402	257	658	0	732	Bacteria_Proteobacteria_Alphaproteobacteria_Rickettsiales_Rickettsiaceae_Rickettsia_Candidatus Rickettsia longicornii		PVIL-merged-M01780:105:000000000-CWNB3:1:1115:22327:14273	KR611716.1	99.751	402	1	0	1	402	303	704	0	737	Bacteria_Proteobacteria_Alphaproteobacteria_Rickettsiales_Anaplasmataceae_Anaplasma_Anaplasma phagocytophilum
NWSE-merged-M01780:105:000000000-CWNB3:1:1118:11881:24037	MT535574.1	99.005	402	4	0	1	402	257	658	0	721	Bacteria_Proteobacteria_Alphaproteobacteria_Rickettsiales_Rickettsiaceae_Rickettsia_Candidatus Rickettsia longicornii		PVIL-merged-M01780:105:000000000-CWNB3:1:1114:21280:20831	MK239931.1	100	402	0	0	1	402	257	658	0	743	Bacteria_Proteobacteria_Alphaproteobacteria_Rickettsiales_Anaplasmataceae_Anaplasma_Anaplasma phagocytophilum
NWSE-merged-M01780:105:000000000-CWNB3:1:2102:15018:13697	MT535574.1	99.751	402	1	0	1	402	257	658	0	737	Bacteria_Proteobacteria_Alphaproteobacteria_Rickettsiales_Rickettsiaceae_Rickettsia_Candidatus Rickettsia longicornii		PVIL-merged-M01780:105:000000000-CWNB3:1:1114:27438:17133	MK239931.1	99.254	402	3	0	1	402	257	658	0	726	Bacteria_Proteobacteria_Alphaproteobacteria_Rickettsiales_Anaplasmataceae_Anaplasma_Anaplasma phagocytophilum
NWSE-merged-M01780:105:000000000-CWNB3:1:2109:15497:17136	MT535574.1	99.751	402	1	0	1	402	257	658	0	737	Bacteria_Proteobacteria_Alphaproteobacteria_Rickettsiales_Rickettsiaceae_Rickettsia_Candidatus Rickettsia longicornii		PVIL-merged-M01780:105:000000000-CWNB3:1:1117:9044:13315	MK239931.1	96.709	395	13	0	1	395	257	651	0	658	Bacteria_Proteobacteria_Alphaproteobacteria_Rickettsiales_Anaplasmataceae_Anaplasma_Anaplasma phagocytophilum
NWSE-merged-M01780:105:000000000-CWNB3:1:2114:24876:16345	MT535574.1	98.01	402	8	0	1	402	257	658	0	699	Bacteria_Proteobacteria_Alphaproteobacteria_Rickettsiales_Rickettsiaceae_Rickettsia_Candidatus Rickettsia longicornii		PVIL-merged-M01780:105:000000000-CWNB3:1:1118:13896:6649	MK239931.1	98.756	402	5	0	1	402	257	658	0	715	Bacteria_Proteobacteria_Alphaproteobacteria_Rickettsiales_Anaplasmataceae_Anaplasma_Anaplasma phagocytophilum
NWSE-merged-M01780:105:000000000-CWNB3:1:1105:12943:19836	MT535574.1	98.507	402	6	0	1	402	257	658	0	710	Bacteria_Proteobacteria_Alphaproteobacteria_Rickettsiales_Rickettsiaceae_Rickettsia_Candidatus Rickettsia longicornii		PVIL-merged-M01780:105:000000000-CWNB3:1:2102:11937:15175	MK239931.1	99.005	402	4	0	1	402	257	658	0	721	Bacteria_Proteobacteria_Alphaproteobacteria_Rickettsiales_Anaplasmataceae_Anaplasma_Anaplasma phagocytophilum
NWSE-merged-M01780:105:000000000-CWNB3:1:1107:12144:20980	MT535574.1	98.01	402	8	0	1	402	257	658	0	699	Bacteria_Proteobacteria_Alphaproteobacteria_Rickettsiales_Rickettsiaceae_Rickettsia_Candidatus Rickettsia longicornii		PVIL-merged-M01780:105:000000000-CWNB3:1:2111:20535:18860	MN227385.1	97.015	402	12	0	1	402	64	465	0	676	Bacteria_Proteobacteria_Alphaproteobacteria_Rickettsiales_Anaplasmataceae_Anaplasma_Anaplasma phagocytophilum
NWSE-merged-M01780:105:000000000-CWNB3:1:1111:23028:8933	MT535574.1	96.845	412	13	0	1	412	257	668	0	689	Bacteria_Proteobacteria_Alphaproteobacteria_Rickettsiales_Rickettsiaceae_Rickettsia_Candidatus Rickettsia longicornii		PVIL-merged-M01780:105:000000000-CWNB3:1:2111:9495:22784	MK239931.1	99.002	401	4	0	1	401	257	657	0	719	Bacteria_Proteobacteria_Alphaproteobacteria_Rickettsiales_Anaplasmataceae_Anaplasma_Anaplasma phagocytophilum
NWSE-merged-M01780:105:000000000-CWNB3:1:1114:11558:12502	MT535574.1	97.555	409	10	0	1	409	257	665	0	701	Bacteria_Proteobacteria_Alphaproteobacteria_Rickettsiales_Rickettsiaceae_Rickettsia_Candidatus Rickettsia longicornii		PVIL-merged-M01780:105:000000000-CWNB3:1:2112:3281:13791	MK239931.1	100	402	0	0	1	402	257	658	0	743	Bacteria_Proteobacteria_Alphaproteobacteria_Rickettsiales_Anaplasmataceae_Anaplasma_Anaplasma phagocytophilum
NWSE-merged-M01780:105:000000000-CWNB3:1:1114:6090:4612	MT535574.1	99.005	402	4	0	1	402	257	658	0	721	Bacteria_Proteobacteria_Alphaproteobacteria_Rickettsiales_Rickettsiaceae_Rickettsia_Candidatus Rickettsia longicornii		PVIL-merged-M01780:105:000000000-CWNB3:1:2110:20191:22227	MK239931.1	100	402	0	0	1	402	257	658	0	743	Bacteria_Proteobacteria_Alphaproteobacteria_Rickettsiales_Anaplasmataceae_Anaplasma_Anaplasma phagocytophilum
NWSE-merged-M01780:105:000000000-CWNB3:1:2109:23287:6260	MT535574.1	97.512	402	10	0	1	402	257	658	0	688	Bacteria_Proteobacteria_Alphaproteobacteria_Rickettsiales_Rickettsiaceae_Rickettsia_Candidatus Rickettsia longicornii		PVIL-merged-M01780:105:000000000-CWNB3:1:1102:26159:8421	MK239931.1	100	402	0	0	1	402	257	658	0	743	Bacteria_Proteobacteria_Alphaproteobacteria_Rickettsiales_Anaplasmataceae_Anaplasma_Anaplasma phagocytophilum
NWSE-merged-M01780:105:000000000-CWNB3:1:2117:25975:13398	MT535574.1	96.526	403	14	0	1	403	257	659	0	667	Bacteria_Proteobacteria_Alphaproteobacteria_Rickettsiales_Rickettsiaceae_Rickettsia_Candidatus Rickettsia longicornii		PVIL-merged-M01780:105:000000000-CWNB3:1:1107:3999:16541	MK239931.1	98.01	402	8	0	1	402	257	658	0	699	Bacteria_Proteobacteria_Alphaproteobacteria_Rickettsiales_Anaplasmataceae_Anaplasma_Anaplasma phagocytophilum
NWSE-merged-M01780:105:000000000-CWNB3:1:1119:24692:12698	MT535574.1	97.264	402	11	0	1	402	257	658	0	682	Bacteria_Proteobacteria_Alphaproteobacteria_Rickettsiales_Rickettsiaceae_Rickettsia_Candidatus Rickettsia longicornii		PVIL-merged-M01780:105:000000000-CWNB3:1:1104:24169:19208	MK239931.1	100	402	0	0	1	402	257	658	0	743	Bacteria_Proteobacteria_Alphaproteobacteria_Rickettsiales_Anaplasmataceae_Anaplasma_Anaplasma phagocytophilum
NWSE-merged-M01780:105:000000000-CWNB3:1:2102:26746:18455	MT535574.1	99.502	402	2	0	1	402	257	658	0	732	Bacteria_Proteobacteria_Alphaproteobacteria_Rickettsiales_Rickettsiaceae_Rickettsia_Candidatus Rickettsia longicornii		PVIL-merged-M01780:105:000000000-CWNB3:1:1106:15224:13016	MK239931.1	96.766	402	13	0	1	402	257	658	0	671	Bacteria_Proteobacteria_Alphaproteobacteria_Rickettsiales_Anaplasmataceae_Anaplasma_Anaplasma phagocytophilum
NWSE-merged-M01780:105:000000000-CWNB3:1:2110:17378:6920	MT535574.1	97.561	410	10	0	1	410	257	666	0	702	Bacteria_Proteobacteria_Alphaproteobacteria_Rickettsiales_Rickettsiaceae_Rickettsia_Candidatus Rickettsia longicornii		PVIL-merged-M01780:105:000000000-CWNB3:1:1110:22877:8016	MK239931.1	100	402	0	0	1	402	257	658	0	743	Bacteria_Proteobacteria_Alphaproteobacteria_Rickettsiales_Anaplasmataceae_Anaplasma_Anaplasma phagocytophilum
NWSE-merged-M01780:105:000000000-CWNB3:1:2114:22063:13320	MT535574.1	98.25	400	7	0	1	400	257	656	0	701	Bacteria_Proteobacteria_Alphaproteobacteria_Rickettsiales_Rickettsiaceae_Rickettsia_Candidatus Rickettsia longicornii		PVIL-merged-M01780:105:000000000-CWNB3:1:1111:22135:5327	MK239931.1	99.751	402	1	0	1	402	257	658	0	737	Bacteria_Proteobacteria_Alphaproteobacteria_Rickettsiales_Anaplasmataceae_Anaplasma_Anaplasma phagocytophilum
NWSE-merged-M01780:105:000000000-CWNB3:1:2114:21184:9953	MT535574.1	99.005	402	4	0	1	402	257	658	0	721	Bacteria_Proteobacteria_Alphaproteobacteria_Rickettsiales_Rickettsiaceae_Rickettsia_Candidatus Rickettsia longicornii		PVIL-merged-M01780:105:000000000-CWNB3:1:1110:21149:20285	MK239931.1	99.509	407	2	0	1	407	252	658	0	741	Bacteria_Proteobacteria_Alphaproteobacteria_Rickettsiales_Anaplasmataceae_Anaplasma_Anaplasma phagocytophilum
NWSE-merged-M01780:105:000000000-CWNB3:1:1101:18523:8078	MT535574.1	98.246	399	7	0	1	399	257	655	0	699	Bacteria_Proteobacteria_Alphaproteobacteria_Rickettsiales_Rickettsiaceae_Rickettsia_Candidatus Rickettsia longicornii		PVIL-merged-M01780:105:000000000-CWNB3:1:1110:14443:16850	MK239931.1	99.751	402	1	0	1	402	257	658	0	737	Bacteria_Proteobacteria_Alphaproteobacteria_Rickettsiales_Anaplasmataceae_Anaplasma_Anaplasma phagocytophilum
NWSE-merged-M01780:105:000000000-CWNB3:1:1109:11824:23766	MT535574.1	98.01	402	8	0	1	402	257	658	0	699	Bacteria_Proteobacteria_Alphaproteobacteria_Rickettsiales_Rickettsiaceae_Rickettsia_Candidatus Rickettsia longicornii		PVIL-merged-M01780:105:000000000-CWNB3:1:1119:13087:14412	MK239931.1	100	402	0	0	1	402	257	658	0	743	Bacteria_Proteobacteria_Alphaproteobacteria_Rickettsiales_Anaplasmataceae_Anaplasma_Anaplasma phagocytophilum
NWSE-merged-M01780:105:000000000-CWNB3:1:1112:28632:11724	MT535574.1	99.254	402	3	0	1	402	257	658	0	726	Bacteria_Proteobacteria_Alphaproteobacteria_Rickettsiales_Rickettsiaceae_Rickettsia_Candidatus Rickettsia longicornii		PVIL-merged-M01780:105:000000000-CWNB3:1:2101:14086:19179	MN227385.1	97.512	402	10	0	1	402	64	465	0	688	Bacteria_Proteobacteria_Alphaproteobacteria_Rickettsiales_Anaplasmataceae_Anaplasma_Anaplasma phagocytophilum
NWSE-merged-M01780:105:000000000-CWNB3:1:2108:6610:13430	MT535574.1	94.608	408	19	3	1	406	257	663	4.98e-176	628	Bacteria_Proteobacteria_Alphaproteobacteria_Rickettsiales_Rickettsiaceae_Rickettsia_Candidatus Rickettsia longicornii		PVIL-merged-M01780:105:000000000-CWNB3:1:2101:19592:5804	MK239931.1	100	402	0	0	1	402	257	658	0	743	Bacteria_Proteobacteria_Alphaproteobacteria_Rickettsiales_Anaplasmataceae_Anaplasma_Anaplasma phagocytophilum
NWSE-merged-M01780:105:000000000-CWNB3:1:1119:24945:3366	MT535574.1	99.254	402	3	0	1	402	257	658	0	726	Bacteria_Proteobacteria_Alphaproteobacteria_Rickettsiales_Rickettsiaceae_Rickettsia_Candidatus Rickettsia longicornii		PVIL-merged-M01780:105:000000000-CWNB3:1:2102:20430:20401	MK239931.1	98.756	402	5	0	1	402	257	658	0	715	Bacteria_Proteobacteria_Alphaproteobacteria_Rickettsiales_Anaplasmataceae_Anaplasma_Anaplasma phagocytophilum
NWSE-merged-M01780:105:000000000-CWNB3:1:2101:15882:13739	MT535574.1	98.01	402	8	0	1	402	257	658	0	699	Bacteria_Proteobacteria_Alphaproteobacteria_Rickettsiales_Rickettsiaceae_Rickettsia_Candidatus Rickettsia longicornii		PVIL-merged-M01780:105:000000000-CWNB3:1:2104:19368:14794	AY969012.1	96.517	402	14	0	1	402	311	712	0	665	Bacteria_Proteobacteria_Alphaproteobacteria_Rickettsiales_Anaplasmataceae_Anaplasma_Anaplasma phagocytophilum
NWSE-merged-M01780:105:000000000-CWNB3:1:2104:17856:21852	MT535574.1	99.502	402	2	0	1	402	257	658	0	732	Bacteria_Proteobacteria_Alphaproteobacteria_Rickettsiales_Rickettsiaceae_Rickettsia_Candidatus Rickettsia longicornii		PVIL-merged-M01780:105:000000000-CWNB3:1:2105:10196:14866	AY969012.1	95.274	402	19	0	1	402	311	712	8.07e-179	638	Bacteria_Proteobacteria_Alphaproteobacteria_Rickettsiales_Anaplasmataceae_Anaplasma_Anaplasma phagocytophilum
NWSE-merged-M01780:105:000000000-CWNB3:1:2113:23217:22835	MT535574.1	99.254	402	3	0	1	402	257	658	0	726	Bacteria_Proteobacteria_Alphaproteobacteria_Rickettsiales_Rickettsiaceae_Rickettsia_Candidatus Rickettsia longicornii		PVIL-merged-M01780:105:000000000-CWNB3:1:2106:13732:15864	MK239931.1	99.751	402	1	0	1	402	257	658	0	737	Bacteria_Proteobacteria_Alphaproteobacteria_Rickettsiales_Anaplasmataceae_Anaplasma_Anaplasma phagocytophilum
NWSE-merged-M01780:105:000000000-CWNB3:1:2117:13585:8446	MT535574.1	98.259	402	7	0	1	402	257	658	0	704	Bacteria_Proteobacteria_Alphaproteobacteria_Rickettsiales_Rickettsiaceae_Rickettsia_Candidatus Rickettsia longicornii		PVIL-merged-M01780:105:000000000-CWNB3:1:2112:4707:21394	MK239931.1	99.751	402	1	0	1	402	257	658	0	737	Bacteria_Proteobacteria_Alphaproteobacteria_Rickettsiales_Anaplasmataceae_Anaplasma_Anaplasma phagocytophilum
NWSE-merged-M01780:105:000000000-CWNB3:1:1101:10855:12749	MT535574.1	97.264	402	11	0	1	402	257	658	0	682	Bacteria_Proteobacteria_Alphaproteobacteria_Rickettsiales_Rickettsiaceae_Rickettsia_Candidatus Rickettsia longicornii		PVIL-merged-M01780:105:000000000-CWNB3:1:2117:21060:7522	MK239931.1	100	402	0	0	1	402	257	658	0	743	Bacteria_Proteobacteria_Alphaproteobacteria_Rickettsiales_Anaplasmataceae_Anaplasma_Anaplasma phagocytophilum
NWSE-merged-M01780:105:000000000-CWNB3:1:1108:12450:20108	MT535574.1	99.254	402	3	0	1	402	257	658	0	726	Bacteria_Proteobacteria_Alphaproteobacteria_Rickettsiales_Rickettsiaceae_Rickettsia_Candidatus Rickettsia longicornii		PVIL-merged-M01780:105:000000000-CWNB3:1:1103:13780:7241	AY969012.1	96.269	402	15	0	1	402	311	712	0	660	Bacteria_Proteobacteria_Alphaproteobacteria_Rickettsiales_Anaplasmataceae_Anaplasma_Anaplasma phagocytophilum
NWSE-merged-M01780:105:000000000-CWNB3:1:1107:9187:20133	MT535574.1	97.761	402	9	0	1	402	257	658	0	693	Bacteria_Proteobacteria_Alphaproteobacteria_Rickettsiales_Rickettsiaceae_Rickettsia_Candidatus Rickettsia longicornii		PVIL-merged-M01780:105:000000000-CWNB3:1:1103:12419:13005	MK239931.1	100	402	0	0	1	402	257	658	0	743	Bacteria_Proteobacteria_Alphaproteobacteria_Rickettsiales_Anaplasmataceae_Anaplasma_Anaplasma phagocytophilum
NWSE-merged-M01780:105:000000000-CWNB3:1:1111:16277:11453	MT535574.1	96.766	402	13	0	1	402	257	658	0	671	Bacteria_Proteobacteria_Alphaproteobacteria_Rickettsiales_Rickettsiaceae_Rickettsia_Candidatus Rickettsia longicornii		PVIL-merged-M01780:105:000000000-CWNB3:1:1105:29574:13680	MK239931.1	100	402	0	0	1	402	257	658	0	743	Bacteria_Proteobacteria_Alphaproteobacteria_Rickettsiales_Anaplasmataceae_Anaplasma_Anaplasma phagocytophilum
NWSE-merged-M01780:105:000000000-CWNB3:1:1116:17202:11020	MT535574.1	96.059	406	16	0	1	406	257	662	0	662	Bacteria_Proteobacteria_Alphaproteobacteria_Rickettsiales_Rickettsiaceae_Rickettsia_Candidatus Rickettsia longicornii		PVIL-merged-M01780:105:000000000-CWNB3:1:1106:17855:11981	MK239931.1	100	402	0	0	1	402	257	658	0	743	Bacteria_Proteobacteria_Alphaproteobacteria_Rickettsiales_Anaplasmataceae_Anaplasma_Anaplasma phagocytophilum
NWSE-merged-M01780:105:000000000-CWNB3:1:1102:5472:14214	MT535574.1	98.756	402	5	0	1	402	257	658	0	715	Bacteria_Proteobacteria_Alphaproteobacteria_Rickettsiales_Rickettsiaceae_Rickettsia_Candidatus Rickettsia longicornii		PVIL-merged-M01780:105:000000000-CWNB3:1:1113:8912:8800	MK239931.1	100	402	0	0	1	402	257	658	0	743	Bacteria_Proteobacteria_Alphaproteobacteria_Rickettsiales_Anaplasmataceae_Anaplasma_Anaplasma phagocytophilum
NWSE-merged-M01780:105:000000000-CWNB3:1:1103:22029:13465	MT535574.1	99.502	402	2	0	1	402	257	658	0	732	Bacteria_Proteobacteria_Alphaproteobacteria_Rickettsiales_Rickettsiaceae_Rickettsia_Candidatus Rickettsia longicornii		PVIL-merged-M01780:105:000000000-CWNB3:1:1114:13774:12604	MK239931.1	100	402	0	0	1	402	257	658	0	743	Bacteria_Proteobacteria_Alphaproteobacteria_Rickettsiales_Anaplasmataceae_Anaplasma_Anaplasma phagocytophilum
NWSE-merged-M01780:105:000000000-CWNB3:1:1109:18790:13141	MT535574.1	98.01	402	8	0	1	402	257	658	0	699	Bacteria_Proteobacteria_Alphaproteobacteria_Rickettsiales_Rickettsiaceae_Rickettsia_Candidatus Rickettsia longicornii		PVIL-merged-M01780:105:000000000-CWNB3:1:1113:15727:21671	MK239931.1	100	402	0	0	1	402	257	658	0	743	Bacteria_Proteobacteria_Alphaproteobacteria_Rickettsiales_Anaplasmataceae_Anaplasma_Anaplasma phagocytophilum
NWSE-merged-M01780:105:000000000-CWNB3:1:2110:18205:6475	MT535574.1	95.309	405	19	0	1	405	257	661	1.75e-180	643	Bacteria_Proteobacteria_Alphaproteobacteria_Rickettsiales_Rickettsiaceae_Rickettsia_Candidatus Rickettsia longicornii		PVIL-merged-M01780:105:000000000-CWNB3:1:1118:2932:12077	MK239931.1	99.751	402	1	0	1	402	257	658	0	737	Bacteria_Proteobacteria_Alphaproteobacteria_Rickettsiales_Anaplasmataceae_Anaplasma_Anaplasma phagocytophilum
NWSE-merged-M01780:105:000000000-CWNB3:1:1115:11295:6569	MT535574.1	98.039	408	8	0	1	408	251	658	0	710	Bacteria_Proteobacteria_Alphaproteobacteria_Rickettsiales_Rickettsiaceae_Rickettsia_Candidatus Rickettsia longicornii		PVIL-merged-M01780:105:000000000-CWNB3:1:2101:11242:20457	MK239931.1	99.254	402	3	0	1	402	257	658	0	726	Bacteria_Proteobacteria_Alphaproteobacteria_Rickettsiales_Anaplasmataceae_Anaplasma_Anaplasma phagocytophilum
NWSE-merged-M01780:105:000000000-CWNB3:1:1119:22049:18220	MT535574.1	94.307	404	23	0	1	404	257	660	2.95e-173	619	Bacteria_Proteobacteria_Alphaproteobacteria_Rickettsiales_Rickettsiaceae_Rickettsia_Candidatus Rickettsia longicornii		PVIL-merged-M01780:105:000000000-CWNB3:1:2104:28065:18064	MK239931.1	99.751	402	1	0	1	402	257	658	0	737	Bacteria_Proteobacteria_Alphaproteobacteria_Rickettsiales_Anaplasmataceae_Anaplasma_Anaplasma phagocytophilum
NWSE-merged-M01780:105:000000000-CWNB3:1:2103:10924:16460	MT535574.1	94.349	407	19	4	1	405	257	661	8.28e-174	621	Bacteria_Proteobacteria_Alphaproteobacteria_Rickettsiales_Rickettsiaceae_Rickettsia_Candidatus Rickettsia longicornii		PVIL-merged-M01780:105:000000000-CWNB3:1:2108:26331:7342	MK239931.1	100	402	0	0	1	402	257	658	0	743	Bacteria_Proteobacteria_Alphaproteobacteria_Rickettsiales_Anaplasmataceae_Anaplasma_Anaplasma phagocytophilum
NWSE-merged-M01780:105:000000000-CWNB3:1:1106:26513:13858	MT535574.1	98.756	402	5	0	1	402	257	658	0	715	Bacteria_Proteobacteria_Alphaproteobacteria_Rickettsiales_Rickettsiaceae_Rickettsia_Candidatus Rickettsia longicornii		PVIL-merged-M01780:105:000000000-CWNB3:1:2108:16520:23215	MK239931.1	99.751	402	1	0	1	402	257	658	0	737	Bacteria_Proteobacteria_Alphaproteobacteria_Rickettsiales_Anaplasmataceae_Anaplasma_Anaplasma phagocytophilum
NWSE-merged-M01780:105:000000000-CWNB3:1:1116:9782:19017	MT535574.1	99.005	402	4	0	1	402	257	658	0	721	Bacteria_Proteobacteria_Alphaproteobacteria_Rickettsiales_Rickettsiaceae_Rickettsia_Candidatus Rickettsia longicornii		PVIL-merged-M01780:105:000000000-CWNB3:1:2116:24859:10880	MK239931.1	100	402	0	0	1	402	257	658	0	743	Bacteria_Proteobacteria_Alphaproteobacteria_Rickettsiales_Anaplasmataceae_Anaplasma_Anaplasma phagocytophilum
NWSE-merged-M01780:105:000000000-CWNB3:1:2102:12759:15297	MT535574.1	98.095	420	7	1	1	419	257	676	0	730	Bacteria_Proteobacteria_Alphaproteobacteria_Rickettsiales_Rickettsiaceae_Rickettsia_Candidatus Rickettsia longicornii		PVIL-merged-M01780:105:000000000-CWNB3:1:1102:22622:12466	AY969012.1	95.274	402	19	0	1	402	311	712	8.07e-179	638	Bacteria_Proteobacteria_Alphaproteobacteria_Rickettsiales_Anaplasmataceae_Anaplasma_Anaplasma phagocytophilum
NWSE-merged-M01780:105:000000000-CWNB3:1:2113:26194:19796	MT535574.1	97.761	402	9	0	1	402	257	658	0	693	Bacteria_Proteobacteria_Alphaproteobacteria_Rickettsiales_Rickettsiaceae_Rickettsia_Candidatus Rickettsia longicornii		PVIL-merged-M01780:105:000000000-CWNB3:1:1106:10965:21299	MK239931.1	100	402	0	0	1	402	257	658	0	743	Bacteria_Proteobacteria_Alphaproteobacteria_Rickettsiales_Anaplasmataceae_Anaplasma_Anaplasma phagocytophilum
NWSE-merged-M01780:105:000000000-CWNB3:1:1111:21139:23731	MT535574.1	98.044	409	8	0	1	409	257	665	0	712	Bacteria_Proteobacteria_Alphaproteobacteria_Rickettsiales_Rickettsiaceae_Rickettsia_Candidatus Rickettsia longicornii		PVIL-merged-M01780:105:000000000-CWNB3:1:1107:25237:4172	MK239931.1	100	402	0	0	1	402	257	658	0	743	Bacteria_Proteobacteria_Alphaproteobacteria_Rickettsiales_Anaplasmataceae_Anaplasma_Anaplasma phagocytophilum
NWSE-merged-M01780:105:000000000-CWNB3:1:1116:8696:4889	MT535574.1	98.259	402	7	0	1	402	257	658	0	704	Bacteria_Proteobacteria_Alphaproteobacteria_Rickettsiales_Rickettsiaceae_Rickettsia_Candidatus Rickettsia longicornii		PVIL-merged-M01780:105:000000000-CWNB3:1:1112:26019:13189	MK239931.1	100	402	0	0	1	402	257	658	0	743	Bacteria_Proteobacteria_Alphaproteobacteria_Rickettsiales_Anaplasmataceae_Anaplasma_Anaplasma phagocytophilum
NWSE-merged-M01780:105:000000000-CWNB3:1:1116:24826:9954	MT535574.1	98.015	403	6	2	1	402	257	658	0	699	Bacteria_Proteobacteria_Alphaproteobacteria_Rickettsiales_Rickettsiaceae_Rickettsia_Candidatus Rickettsia longicornii		PVIL-merged-M01780:105:000000000-CWNB3:1:1112:19285:10347	MK239931.1	100	402	0	0	1	402	257	658	0	743	Bacteria_Proteobacteria_Alphaproteobacteria_Rickettsiales_Anaplasmataceae_Anaplasma_Anaplasma phagocytophilum
NWSE-merged-M01780:105:000000000-CWNB3:1:1117:16688:16728	MT535574.1	96.394	416	15	0	1	416	257	672	0	686	Bacteria_Proteobacteria_Alphaproteobacteria_Rickettsiales_Rickettsiaceae_Rickettsia_Candidatus Rickettsia longicornii		PVIL-merged-M01780:105:000000000-CWNB3:1:1113:16480:11498	MK239931.1	100	402	0	0	1	402	257	658	0	743	Bacteria_Proteobacteria_Alphaproteobacteria_Rickettsiales_Anaplasmataceae_Anaplasma_Anaplasma phagocytophilum
NWSE-merged-M01780:105:000000000-CWNB3:1:2104:7831:7568	MT535574.1	99.502	402	2	0	1	402	257	658	0	732	Bacteria_Proteobacteria_Alphaproteobacteria_Rickettsiales_Rickettsiaceae_Rickettsia_Candidatus Rickettsia longicornii		PVIL-merged-M01780:105:000000000-CWNB3:1:1113:3647:15566	MK239931.1	99.254	402	3	0	1	402	257	658	0	726	Bacteria_Proteobacteria_Alphaproteobacteria_Rickettsiales_Anaplasmataceae_Anaplasma_Anaplasma phagocytophilum
NWSE-merged-M01780:105:000000000-CWNB3:1:2109:27182:19033	MT535574.1	94.279	402	23	0	1	402	257	658	3.78e-172	616	Bacteria_Proteobacteria_Alphaproteobacteria_Rickettsiales_Rickettsiaceae_Rickettsia_Candidatus Rickettsia longicornii		PVIL-merged-M01780:105:000000000-CWNB3:1:1114:22814:4604	MK239931.1	97.512	402	10	0	1	402	257	658	0	688	Bacteria_Proteobacteria_Alphaproteobacteria_Rickettsiales_Anaplasmataceae_Anaplasma_Anaplasma phagocytophilum
NWSE-merged-M01780:105:000000000-CWNB3:1:2113:8746:8715	MT535574.1	97.087	412	12	0	1	412	257	668	0	695	Bacteria_Proteobacteria_Alphaproteobacteria_Rickettsiales_Rickettsiaceae_Rickettsia_Candidatus Rickettsia longicornii		PVIL-merged-M01780:105:000000000-CWNB3:1:1116:3042:14552	MK239931.1	100	402	0	0	1	402	257	658	0	743	Bacteria_Proteobacteria_Alphaproteobacteria_Rickettsiales_Anaplasmataceae_Anaplasma_Anaplasma phagocytophilum
NWSE-merged-M01780:105:000000000-CWNB3:1:1108:18819:12685	MT535574.1	99.502	402	2	0	1	402	257	658	0	732	Bacteria_Proteobacteria_Alphaproteobacteria_Rickettsiales_Rickettsiaceae_Rickettsia_Candidatus Rickettsia longicornii		PVIL-merged-M01780:105:000000000-CWNB3:1:1119:5950:19152	MK239931.1	100	402	0	0	1	402	257	658	0	743	Bacteria_Proteobacteria_Alphaproteobacteria_Rickettsiales_Anaplasmataceae_Anaplasma_Anaplasma phagocytophilum
NWSE-merged-M01780:105:000000000-CWNB3:1:1112:23063:10024	MT535574.1	98.756	402	5	0	1	402	257	658	0	715	Bacteria_Proteobacteria_Alphaproteobacteria_Rickettsiales_Rickettsiaceae_Rickettsia_Candidatus Rickettsia longicornii		PVIL-merged-M01780:105:000000000-CWNB3:1:1117:16565:8352	KR611716.1	97.03	404	12	0	1	404	303	706	0	680	Bacteria_Proteobacteria_Alphaproteobacteria_Rickettsiales_Anaplasmataceae_Anaplasma_Anaplasma phagocytophilum
NWSE-merged-M01780:105:000000000-CWNB3:1:1113:13040:15455	MT535574.1	99.502	402	2	0	1	402	257	658	0	732	Bacteria_Proteobacteria_Alphaproteobacteria_Rickettsiales_Rickettsiaceae_Rickettsia_Candidatus Rickettsia longicornii		PVIL-merged-M01780:105:000000000-CWNB3:1:1118:16470:6919	MK239931.1	100	402	0	0	1	402	257	658	0	743	Bacteria_Proteobacteria_Alphaproteobacteria_Rickettsiales_Anaplasmataceae_Anaplasma_Anaplasma phagocytophilum
NWSE-merged-M01780:105:000000000-CWNB3:1:1118:14756:5154	MT535574.1	98.756	402	5	0	1	402	257	658	0	715	Bacteria_Proteobacteria_Alphaproteobacteria_Rickettsiales_Rickettsiaceae_Rickettsia_Candidatus Rickettsia longicornii		PVIL-merged-M01780:105:000000000-CWNB3:1:1119:28841:11778	MK239931.1	100	402	0	0	1	402	257	658	0	743	Bacteria_Proteobacteria_Alphaproteobacteria_Rickettsiales_Anaplasmataceae_Anaplasma_Anaplasma phagocytophilum
NWSE-merged-M01780:105:000000000-CWNB3:1:2101:19068:7128	MT535574.1	99.751	402	1	0	1	402	257	658	0	737	Bacteria_Proteobacteria_Alphaproteobacteria_Rickettsiales_Rickettsiaceae_Rickettsia_Candidatus Rickettsia longicornii		PVIL-merged-M01780:105:000000000-CWNB3:1:1118:9566:11002	MK239931.1	100	402	0	0	1	402	257	658	0	743	Bacteria_Proteobacteria_Alphaproteobacteria_Rickettsiales_Anaplasmataceae_Anaplasma_Anaplasma phagocytophilum
NWSE-merged-M01780:105:000000000-CWNB3:1:1108:11269:24285	MT535574.1	97.264	402	11	0	1	402	257	658	0	682	Bacteria_Proteobacteria_Alphaproteobacteria_Rickettsiales_Rickettsiaceae_Rickettsia_Candidatus Rickettsia longicornii		PVIL-merged-M01780:105:000000000-CWNB3:1:2101:8641:23260	MK239931.1	99.502	402	2	0	1	402	257	658	0	732	Bacteria_Proteobacteria_Alphaproteobacteria_Rickettsiales_Anaplasmataceae_Anaplasma_Anaplasma phagocytophilum
NWSE-merged-M01780:105:000000000-CWNB3:1:1112:20158:20619	MT535574.1	99.254	402	3	0	1	402	257	658	0	726	Bacteria_Proteobacteria_Alphaproteobacteria_Rickettsiales_Rickettsiaceae_Rickettsia_Candidatus Rickettsia longicornii		PVIL-merged-M01780:105:000000000-CWNB3:1:2106:23590:17332	AY969012.1	96.02	402	16	0	1	402	311	712	0	654	Bacteria_Proteobacteria_Alphaproteobacteria_Rickettsiales_Anaplasmataceae_Anaplasma_Anaplasma phagocytophilum
NWSE-merged-M01780:105:000000000-CWNB3:1:1117:16266:21868	MT535574.1	99.751	402	1	0	1	402	257	658	0	737	Bacteria_Proteobacteria_Alphaproteobacteria_Rickettsiales_Rickettsiaceae_Rickettsia_Candidatus Rickettsia longicornii		PVIL-merged-M01780:105:000000000-CWNB3:1:2111:15355:15066	MK239931.1	100	402	0	0	1	402	257	658	0	743	Bacteria_Proteobacteria_Alphaproteobacteria_Rickettsiales_Anaplasmataceae_Anaplasma_Anaplasma phagocytophilum
NWSE-merged-M01780:105:000000000-CWNB3:1:1117:28493:11252	MT535574.1	98.756	402	5	0	1	402	257	658	0	715	Bacteria_Proteobacteria_Alphaproteobacteria_Rickettsiales_Rickettsiaceae_Rickettsia_Candidatus Rickettsia longicornii		PVIL-merged-M01780:105:000000000-CWNB3:1:2108:14818:21868	MK239931.1	100	402	0	0	1	402	257	658	0	743	Bacteria_Proteobacteria_Alphaproteobacteria_Rickettsiales_Anaplasmataceae_Anaplasma_Anaplasma phagocytophilum
NWSE-merged-M01780:105:000000000-CWNB3:1:2111:9034:9618	MT535574.1	99.502	402	2	0	1	402	257	658	0	732	Bacteria_Proteobacteria_Alphaproteobacteria_Rickettsiales_Rickettsiaceae_Rickettsia_Candidatus Rickettsia longicornii		PVIL-merged-M01780:105:000000000-CWNB3:1:2118:11225:17421	MK239931.1	100	402	0	0	1	402	257	658	0	743	Bacteria_Proteobacteria_Alphaproteobacteria_Rickettsiales_Anaplasmataceae_Anaplasma_Anaplasma phagocytophilum
NWSE-merged-M01780:105:000000000-CWNB3:1:1106:20505:16389	MT535574.1	92.04	402	32	0	1	402	257	658	3.86e-157	566	Bacteria_Proteobacteria_Alphaproteobacteria_Rickettsiales_Rickettsiaceae_Rickettsia_Candidatus Rickettsia longicornii		PVIL-merged-M01780:105:000000000-CWNB3:1:2116:14118:3899	MK239931.1	99.751	402	1	0	1	402	257	658	0	737	Bacteria_Proteobacteria_Alphaproteobacteria_Rickettsiales_Anaplasmataceae_Anaplasma_Anaplasma phagocytophilum
NWSE-merged-M01780:105:000000000-CWNB3:1:2109:23050:8996	MT535574.1	96.341	410	15	0	1	410	257	666	0	675	Bacteria_Proteobacteria_Alphaproteobacteria_Rickettsiales_Rickettsiaceae_Rickettsia_Candidatus Rickettsia longicornii		PVIL-merged-M01780:105:000000000-CWNB3:1:1106:9093:9452	AY969012.1	96.02	402	16	0	1	402	311	712	0	654	Bacteria_Proteobacteria_Alphaproteobacteria_Rickettsiales_Anaplasmataceae_Anaplasma_Anaplasma phagocytophilum
NWSE-merged-M01780:105:000000000-CWNB3:1:1107:17961:19941	MT535574.1	99.005	402	4	0	1	402	257	658	0	721	Bacteria_Proteobacteria_Alphaproteobacteria_Rickettsiales_Rickettsiaceae_Rickettsia_Candidatus Rickettsia longicornii		PVIL-merged-M01780:105:000000000-CWNB3:1:1107:20895:10062	MK239931.1	100	402	0	0	1	402	257	658	0	743	Bacteria_Proteobacteria_Alphaproteobacteria_Rickettsiales_Anaplasmataceae_Anaplasma_Anaplasma phagocytophilum
NWSE-merged-M01780:105:000000000-CWNB3:1:2114:10351:11168	MT535574.1	97.761	402	9	0	1	402	257	658	0	693	Bacteria_Proteobacteria_Alphaproteobacteria_Rickettsiales_Rickettsiaceae_Rickettsia_Candidatus Rickettsia longicornii		PVIL-merged-M01780:105:000000000-CWNB3:1:1110:7924:4995	MK239931.1	98.259	402	7	0	1	402	257	658	0	704	Bacteria_Proteobacteria_Alphaproteobacteria_Rickettsiales_Anaplasmataceae_Anaplasma_Anaplasma phagocytophilum
NWSE-merged-M01780:105:000000000-CWNB3:1:1101:26611:5743	MT535574.1	97.761	402	9	0	1	402	257	658	0	693	Bacteria_Proteobacteria_Alphaproteobacteria_Rickettsiales_Rickettsiaceae_Rickettsia_Candidatus Rickettsia longicornii		PVIL-merged-M01780:105:000000000-CWNB3:1:1109:14974:20977	MK239931.1	100	402	0	0	1	402	257	658	0	743	Bacteria_Proteobacteria_Alphaproteobacteria_Rickettsiales_Anaplasmataceae_Anaplasma_Anaplasma phagocytophilum
NWSE-merged-M01780:105:000000000-CWNB3:1:1104:21233:17519	MT535574.1	99.254	402	3	0	1	402	257	658	0	726	Bacteria_Proteobacteria_Alphaproteobacteria_Rickettsiales_Rickettsiaceae_Rickettsia_Candidatus Rickettsia longicornii		PVIL-merged-M01780:105:000000000-CWNB3:1:1110:25536:9184	MK239931.1	100	402	0	0	1	402	257	658	0	743	Bacteria_Proteobacteria_Alphaproteobacteria_Rickettsiales_Anaplasmataceae_Anaplasma_Anaplasma phagocytophilum
NWSE-merged-M01780:105:000000000-CWNB3:1:1109:9300:13051	MT535574.1	97.761	402	9	0	1	402	257	658	0	693	Bacteria_Proteobacteria_Alphaproteobacteria_Rickettsiales_Rickettsiaceae_Rickettsia_Candidatus Rickettsia longicornii		PVIL-merged-M01780:105:000000000-CWNB3:1:1111:14850:17062	MK239931.1	100	402	0	0	1	402	257	658	0	743	Bacteria_Proteobacteria_Alphaproteobacteria_Rickettsiales_Anaplasmataceae_Anaplasma_Anaplasma phagocytophilum
[truncated: 229,675+ more rows]
