# Supplementary material for: Comparative hologenomics of two Ixodes scapularis tick populations in New Jersey
Source: PeerJ. 2021 Nov 9;9:e12313. doi: 10.7717/peerj.12313 (PMC8588856; doi:10.7717/peerj.12313)
Supplement: Supplemental Information 7 — The mitochondrial genome generated in this study was derived from the Perrineville (PVIL) data, annotated with MITOS (Bernt et al., 2013) and deposited as NCBI accession MZ645749. [file peerj-09-12313-s007.xlsx]

## Sheet: Sheet1
Gene	Type	Start Pos.	End Pos.	NT Length	Direction
tRNA-Met	tRNA	1	64	64	forward
nad2	CDS	80	937	858	forward
tRNA-Trp	tRNA	1036	1100	65	forward
tRNA-Cys	tRNA	1093	1154	62	reverse
tRNA-Tyr	tRNA	1164	1229	66	reverse
cox1	CDS	1222	2739	1518	forward
cox2	CDS	2787	3431	645	forward
tRNA-Lys	tRNA	3445	3512	68	forward
tRNA-Asp	tRNA	3513	3575	63	forward
atp8	CDS	3576	3728	153	forward
atp6	CDS	3725	4384	660	forward
cox3	CDS	4400	5167	768	forward
tRNA-Gly	tRNA	5175	5237	63	forward
nad3	CDS	5250	5564	315	forward
tRNA-Ala	tRNA	5574	5635	62	forward
tRNA-Arg	tRNA	5636	5696	61	forward
tRNA-Asn	tRNA	5697	5761	65	forward
tRNA-Ser	tRNA	5765	5819	55	forward
tRNA-Glu	tRNA	5820	5882	63	forward
tRNA-Phe	tRNA	5886	5950	65	reverse
nad5	CDS	6069	7568	1500	reverse
tRNA-His	tRNA	7620	7680	61	reverse
nad4	CDS	7698	8999	1302	reverse
nad4l	CDS	8996	9253	258	reverse
tRNA-Thr	tRNA	9271	9332	62	forward
tRNA-Pro	tRNA	9333	9397	65	reverse
nad6-0	CDS	9400	9816	417	forward
cob	CDS	9859	10908	1050	forward
tRNA-Ser	tRNA	10913	10976	64	forward
nad1	CDS	11033	11914	882	reverse
tRNA-Leu	tRNA	11915	11979	65	reverse
tRNA-Leu	tRNA	11987	12048	62	reverse
rrnL	rRNA	12085	13076	992	reverse
tRNA-Val	tRNA	13269	13328	60	reverse
rrnS	rRNA	13321	14115	795	reverse
tRNA-Ile	tRNA	14388	14456	69	forward
tRNA-Gln	tRNA	14462	14532	71	reverse
