# Supplementary material for: Comparative hologenomics of two Ixodes scapularis tick populations in New Jersey
Source: PeerJ. 2021 Nov 9;9:e12313. doi: 10.7717/peerj.12313 (PMC8588856; doi:10.7717/peerj.12313)
Supplement: Supplemental Information 8 — Variants with a frequency of greater or equal to 25% shown; frequency defined as the number of reads containing the variant divided by total number of reads mapped at each reference nucleotide position. Variant p-value of each SNV was defined as the probability of encountering the variant by chance due to sequencing error after averaging base quality scores for all nucleotides that comprise the variant and reference sets separately (as implemented in Geneious Prime 2020 [https://www.geneious.com ]). [file peerj-09-12313-s008.xlsx]

## Sheet: Sheet1
Sample	Gene	Position	Amino Acid Change	CDS Position	Change	Polymorphism Type	Protein Effect	Variant P-Value (approximate)	Reference Frequency	Variant Frequency	Coverage
PVIL	intergenic	12736			A -> T	SNP (transversion)		1.1e-238	0.738	0.26	389
PVIL	nad5	7557		12	A -> G	SNP (transition)	None	1e-277	0.735	0.265	408
PVIL	intergenic	14437			(T)8 -> (T)7	Deletion (tandem repeat)		2.4e-55		0.27	252
PVIL	nad2	514		435	G -> A	SNP (transition)	None	4.4e-197	0.711	0.279	294
PVIL	nad5	6159		1410	A -> T	SNP (transversion)	None	4.9e-240	0.718	0.279	344
PVIL	intergenic	6018			A -> T	SNP (transversion)		6.8e-238	0.716	0.281	338
PVIL	cob	10095		237	C -> T	SNP (transition)	None	7.7e-169	0.693	0.288	306
PVIL	cox3	4435		36	A -> G	SNP (transition)	None	2.5e-257	0.705	0.292	349
PVIL	intergenic	13981			(TA)5 -> (TA)6	Insertion (tandem repeat)		2.6E-322		0.315	400
PVIL	nad6-0	9558		159	G -> A	SNP (transition)	None	1.9e-278	0.666	0.325	320
PVIL	atp6	4318		594	G -> A	SNP (transition)	None	1.0E-318	0.659	0.327	364
PVIL	cox1	2625		1404	C -> T	SNP (transition)	None	2.3e-298	0.668	0.332	334
PVIL	intergenic	14444			A -> G	SNP (transition)		6.1e-185	0.659	0.337	249
PVIL	cob	10197		339	A -> G	SNP (transition)	None	1e-255	0.648	0.338	361
PVIL	intergenic	13859			T -> C	SNP (transition)		0	0.65	0.346	468
PVIL	intergenic	13976			T -> A	SNP (transversion)		0	0.647	0.353	391
PVIL	cox3	4744		345	G -> A	SNP (transition)	None	0	0.638	0.359	398
PVIL	atp8	3666	V -> F	91	G -> T	SNP (transversion)	Substitution	1.7e-257	0.593	0.367	300
PVIL	intergenic	13795			T -> A	SNP (transversion)		0	0.629	0.369	453
PVIL	intergenic	14402			G -> A	SNP (transition)		1.3E-322	0.626	0.371	356
PVIL	nad2	334		255	C -> T	SNP (transition)	None	2.3E-313	0.624	0.373	330
PVIL	intergenic	12726			-C	Deletion		2.8e-219		0.377	374
PVIL	intergenic	13472			A -> T	SNP (transversion)		0	0.613	0.379	385
PVIL	cox1	1812		591	T -> C	SNP (transition)	None	0	0.604	0.393	394
PVIL	atp6	4137	T -> S	413	C -> G	SNP (transversion)	Substitution	4.9E-324	0.599	0.394	307
PVIL	intergenic	5692			(TT)3 -> (TT)4	Insertion (tandem repeat)		0		0.42	326
PVIL	nad5	6411	L -> F	1158	T -> A	SNP (transversion)	Substitution	0	0.562	0.438	377
PVIL	nad4	8889		111	G -> A	SNP (transition)	None	0	0.541	0.448	366
PVIL	cox1	2523		1302	G -> A	SNP (transition)	None	0	0.519	0.479	420
NWSE	cox1	1443		222	T -> C	SNP (transition)	None	4e-160	0.749	0.251	271
NWSE	cox2	2996		210	C -> T	SNP (transition)	None	3.1e-176	0.738	0.251	275
NWSE	intergenic	10928			C -> T	SNP (transition)		7.5e-182	0.747	0.253	292
NWSE	intergenic	1062			A -> G	SNP (transition)		1.5e-188	0.743	0.254	315
NWSE	intergenic	13047			A -> G	SNP (transition)		3.6e-121	0.745	0.255	192
NWSE	intergenic	13856			(T)6 -> (T)5	Deletion (tandem repeat)		1.2e-129		0.255	325
NWSE	cox1	1632		411	C -> T	SNP (transition)	None	9.4e-199	0.744	0.256	344
NWSE	nad2	118		39	A -> G	SNP (transition)	None	1.2e-98	0.739	0.257	230
NWSE	intergenic	13541			(T)7 -> (T)8	Insertion (tandem repeat)		6.8e-190		0.258	298
NWSE	cox1	1698		477	G -> A	SNP (transition)	None	4.7e-208	0.738	0.259	340
NWSE	cox1	2598		1377	T -> C	SNP (transition)	None	2e-205	0.74	0.26	308
NWSE	cox2	2912		126	T -> C	SNP (transition)	None	1.5e-205	0.726	0.261	307
NWSE	nad2	664		585	C -> T	SNP (transition)	None	3.6e-178	0.727	0.265	260
NWSE	cob	10715	I -> T	857	T -> C	SNP (transition)	Substitution	3.8e-209	0.733	0.267	303
NWSE	nad1	11825		90	A -> T	SNP (transversion)	None	3.1e-167	0.724	0.272	246
NWSE	intergenic	14350			A -> T	SNP (transversion)		5.1e-197	0.727	0.273	289
NWSE	nad4	8166		834	A -> G	SNP (transition)	None	4.1e-155	0.726	0.274	226
NWSE	intergenic	14282			C -> T	SNP (transition)		1.4e-199	0.723	0.274	292
NWSE	nad6-0	9807		408	C -> T	SNP (transition)	None	4.4e-170	0.709	0.275	247
NWSE	nad5	6528	I -> M	1041	A -> T	SNP (transversion)	Substitution	1.8e-187	0.717	0.276	272
NWSE	atp6	4162		438	T -> C	SNP (transition)	None	7.8e-208	0.721	0.279	297
NWSE	nad5	6669		900	G -> A	SNP (transition)	None	2.8e-180	0.717	0.283	276
NWSE	intergenic	13283			C -> T	SNP (transition)		8.4e-221	0.717	0.283	311
NWSE	cob	9864	I -> M	6	T -> A	SNP (transversion)	Substitution	8.8e-174	0.707	0.285	242
NWSE	nad1	11837		78	C -> T	SNP (transition)	None	4.4e-169	0.708	0.288	233
NWSE	intergenic	13789			(T)7 -> (T)8	Insertion (tandem repeat)		1.1e-221		0.289	305
NWSE	nad3	5525		276	G -> A	SNP (transition)	None	7e-194	0.707	0.29	276
NWSE	cox1	2409		1188	T -> C	SNP (transition)	None	1.1e-236	0.705	0.295	305
NWSE	cob	10623		765	G -> A	SNP (transition)	None	7.1e-223	0.704	0.296	297
NWSE	nad2	799	F -> L	720	C -> A	SNP (transversion)	Substitution	1.3e-218	0.704	0.296	280
NWSE	intergenic	13247			G -> A	SNP (transition)		3.8e-217	0.702	0.298	312
NWSE	cob	10894		1036	C -> T	SNP (transition)	None	4.1e-206	0.694	0.302	268
NWSE	intergenic	12405			T -> A	SNP (transversion)		5.3e-300	0.685	0.312	362
NWSE	cox1	2718		1497	T -> A	SNP (transversion)	None	1e-244	0.68	0.313	294
NWSE	cox2	3377		591	T -> C	SNP (transition)	None	7.7e-232	0.678	0.315	276
NWSE	intergenic	11980			T -> C	SNP (transition)		4.5e-261	0.684	0.316	310
NWSE	intergenic	5970			C -> T	SNP (transition)		5.1e-214	0.673	0.323	257
NWSE	nad2	376		297	C -> T	SNP (transition)	None	1.3e-240	0.67	0.33	282
NWSE	nad4	8060		940	A -> G	SNP (transition)	None	9.4e-243	0.664	0.336	268
NWSE	intergenic	12078			(A)6 -> (A)7	Insertion (tandem repeat)		1.4e-253		0.348	279
NWSE	intergenic	12938			(A)7 -> (A)8	Insertion (tandem repeat)		1.3e-193		0.351	202
NWSE	intergenic	985			C -> T	SNP (transition)		5.4e-263	0.642	0.358	279
NWSE	cox1	2274		1053	G -> A	SNP (transition)	None	8.4e-244	0.629	0.363	245
NWSE	nad6-0	9429		30	C -> T	SNP (transition)	None	1.1e-279	0.626	0.367	278
NWSE	cox1	1527		306	G -> A	SNP (transition)	None	7.1e-281	0.618	0.375	293
NWSE	cox1	2724		1503	G -> A	SNP (transition)	None	5.6E-319	0.614	0.38	316
NWSE	nad1	11804		111	G -> A	SNP (transition)	None	1.2e-270	0.62	0.38	258
NWSE	nad3	5348		99	A -> T	SNP (transversion)	None	4.2e-296	0.615	0.385	278
NWSE	intergenic	9855			C -> T	SNP (transition)		3.3e-251	0.597	0.387	243
NWSE	intergenic	12727			(TT)4 -> (TT)3	Deletion (tandem repeat)		8.3e-214		0.39	292
NWSE	intergenic	5224			G -> T	SNP (transversion)		1.6e-268	0.52	0.397	252
NWSE	intergenic	13087			A -> G	SNP (transition)		1.1e-232	0.586	0.41	210
NWSE	cox1	2202		981	T -> C	SNP (transition)	None	5.7e-297	0.584	0.416	245
NWSE	cox1	1425		204	A -> G	SNP (transition)	None	1e-297	0.582	0.418	273
NWSE	cox1	1593		372	C -> T	SNP (transition)	None	0	0.569	0.431	313
NWSE	intergenic	10976			(T)7 -> (T)8	Insertion (tandem repeat)		1.0E-318		0.435	278
NWSE	cox2	3027		241	C -> T	SNP (transition)	None	0	0.547	0.443	300
NWSE	nad4	8211		789	C -> T	SNP (transition)	None	0	0.552	0.448	261
NWSE	cob	10764		906	A -> G	SNP (transition)	None	0	0.533	0.453	287
NWSE	atp6	3732	T -> M	8	C -> T	SNP (transition)	Substitution	0	0.492	0.488	258
NWSE	intergenic	13262			T -> A	SNP (transversion)		0	0.511	0.489	307
NWSE	atp8	3719		144	G -> A	SNP (transition)	None	0	0.474	0.494	247
NWSE	cox1	1950		729	T -> C	SNP (transition)	None	0	0.495	0.505	297
NWSE	nad4l	9164		90	C -> T	SNP (transition)	None	0	0.469	0.521	290
NWSE	intergenic	10961			(T)6 -> (T)7	Insertion (tandem repeat)		0		0.59	273
NWSE	intergenic	13313			A -> G	SNP (transition)		0	0.325	0.675	308
NWSE	nad4	8559		441	A -> G	SNP (transition)	None	0	0.255	0.745	243
BOTH	atp6	3982		258	A -> G	SNP (transition)	None
BOTH	atp6	3988	M -> I	264	G -> T	SNP (transversion)	Substitution
BOTH	cob	10383		525	A -> G	SNP (transition)	None
BOTH	cox1	1843		622	C -> T	SNP (transition)	None
BOTH	cox2	3080		294	A -> G	SNP (transition)	None
BOTH	cox3	4903	L -> F	504	A -> T	SNP (transversion)	Substitution
BOTH	cox3	5113		714	T -> C	SNP (transition)	None
BOTH	cox3	5137		738	G -> A	SNP (transition)	None
BOTH	nad1	11129		786	G -> A	SNP (transition)	None
BOTH	nad1	11180		735	A -> G	SNP (transition)	None
BOTH	nad1	11219		696	G -> A	SNP (transition)	None		0.612
BOTH	nad1	11264		651	C -> T	SNP (transition)	None		0.628
BOTH	nad1	11412	S -> K	503	C -> T	SNP (transition)	Substitution		0.603
BOTH	nad1	11816		99	G -> A	SNP (transition)	None
BOTH	nad2	456	L -> S	377	T -> C	SNP (transition)	Substitution
BOTH	nad3	5399		150	A -> G	SNP (transition)	None
BOTH	nad4	7905		1095	A -> C	SNP (transversion)	None
BOTH	nad4	8903	M -> L	97	T -> A	SNP (transversion)	Substitution
BOTH	nad4l	9233		21	C -> T	SNP (transition)	None
BOTH	nad5	6228		1341	A -> G	SNP (transition)	None
BOTH	nad5	6843		726	G -> A	SNP (transition)	None
BOTH	nad5	7008		561	A -> G	SNP (transition)	None
BOTH	nad5	7050		519	A -> G	SNP (transition)	None		0.513
BOTH	nad5	7224		345	A -> G	SNP (transition)	None
BOTH	intergenic	18			T -> A	SNP (transversion)
BOTH	intergenic	997			G -> A	SNP (transition)
BOTH	intergenic	1049			(A)7 -> (A)8	Insertion (tandem repeat)
BOTH	intergenic	3529			C -> T	SNP (transition)
BOTH	intergenic	5867			(T)5 -> (T)6	Insertion (tandem repeat)
BOTH	intergenic	5925			(T)6 -> (T)7	Insertion (tandem repeat)
BOTH	intergenic	9376			C -> T	SNP (transition)
BOTH	intergenic	9858			T -> A	SNP (transversion)
BOTH	intergenic	12030			(T)6 -> (T)5	Deletion (tandem repeat)
BOTH	intergenic	12049			G -> T	SNP (transversion)
BOTH	intergenic	12078			T -> A	SNP (transversion)
BOTH	intergenic	12765			(A)10 -> (A)9	Deletion (tandem repeat)
BOTH	intergenic	13258			A -> G	SNP (transition)
BOTH	intergenic	13984			A -> T	SNP (transversion)
BOTH	intergenic	13986			#NAME?	Deletion
BOTH	intergenic	14089			T -> A	SNP (transversion)
BOTH	intergenic	14181			C -> T	SNP (transition)
BOTH	intergenic	14279			T -> C	SNP (transition)
BOTH	intergenic	14358			CA -> AC	Substitution
BOTH	intergenic	14363			A -> T	SNP (transversion)
BOTH	intergenic	14436			(T)8 -> (T)7	Deletion (tandem repeat)
