# Supplementary material for: Comparative hologenomics of two Ixodes scapularis tick populations in New Jersey
Source: PeerJ. 2021 Nov 9;9:e12313. doi: 10.7717/peerj.12313 (PMC8588856; doi:10.7717/peerj.12313)
Supplement: Supplemental Information 9 — Reads were mapped to the Rickettsia endosymbiont of Ixodes scapularis str. Wikel genome sequence + 3 associated plasmids (NCBI BioProject PRJNA33979) using BBmap. Variants with a frequency of greater or equal to 25% shown; frequency defined as the number of reads containing the variant divided by total number of reads mapped at each reference nucleotide position. Variant p-value of each SNV was defined as the probability of encountering the variant by chance due to sequencing error after averaging base quality scores for all nucleotides that comprise the variant and reference sets separately (as implemented in Geneious Prime 2020 [https://www.geneious.com ]). [file peerj-09-12313-s009.xlsx]

## Sheet: Sheet1
Sample	Gene	Position	Amino Acid Change	CDS Position	Change	Polymorphism Type	Protein Effect	Variant P-Value (approximate)	Reference Frequency	Variant Frequency	Coverage
NWSE	DUF2497	1163556			A->G	SNP (transition)		3.2e-109		1	31
NWSE	intergenic	1207349			T->C	SNP (transition)		4e-69		1	19
NWSE	integrase (pseudogene)	1670138		983	T->G	SNP (transversion)	Truncation	1.8e-96	0.036	0.964	28
NWSE	intergenic	1549907			G->A	SNP (transition)		4.4e-73		0.917	24
NWSE	hypothetical protein	1329719		46	T->C	SNP (transition)	None	3.5e-78	0.074	0.926	27
PVIL	conjugal transfer pilus assembly protein TraU	706940		252	G->A	SNP (transition)	None	7.7e-50	0.2	0.8	20
PVIL	conjugal transfer pilus assembly protein TraU	706943		255	C->G	SNP (transversion)	None	1.5e-39	0.2	0.7	20
PVIL	conjugal transfer pilus assembly protein TraU	706946		258	GC.GT.A->AAGACTT	Substitution	None	1.7e-40		68.4% -> 70.0%	19 -> 20
NWSE	conjugal transfer protein TraA	760409	L -> I	1000	G->T	SNP (transversion)	Substitution	1e-99		1	30
NWSE	conjugal transfer protein TraA	760415	I -> L	994	T->G	SNP (transversion)	Substitution	2.5e-106		1	32
NWSE	conjugal transfer protein TraA	760419		990	G->A	SNP (transition)	None	1.6e-109		1	32
NWSE	conjugal transfer protein TraA	760423	N -> S	986	T->C	SNP (transition)	Substitution	1e-112		1	32
NWSE	conjugal transfer protein TraA	760431	I -> M	978	A->C	SNP (transversion)	Substitution	1.6e-109		1	32
PVIL	conjugal transfer protein TraA	760431	I -> M	978	A->C	SNP (transversion)	Substitution	3.4e-17	0.75	0.25	24
NWSE	conjugal transfer protein TraA	760434		975	C->T	SNP (transition)	None	1e-112		1	32
PVIL	conjugal transfer protein TraA	760434		975	C->T	SNP (transition)	None	3.4e-17	0.75	0.25	24
